# Supplementary material for: PROFILING OF Y1 CELLS TREATED WITH FGF-2 REVEALS PARALLELS WITH ONCOGENE-INDUCED SENESCENCE
Source: bioRxiv preprint, doi:10.1101/2020.08.17.247023, version 1 (2020-08-18)
Supplement: Table 2 [file 247023_file05.csv]

SYMBOL	RNA_baseMean	RNA_log2FoldChange_FGFvFBS	RNA_lfcSE	RNA_stat	RNA_pvalue	RNA_padj	PeakNo	seqnames	start	end	width	strand	Conc	Conc_FBS	Conc_FGF	Fold	p.value	FDR	FBS_1	FBS_2	FGF_1	FGF_2	annotation	geneChr	geneStart	geneEnd	geneLength	geneStrand	geneId	transcriptId	distanceToTSS	ENSEMBL	GENENAME	flank_txIds	flank_geneIds	flank_gene_distances	H3K27ac_subset	RNA_subset	concordance
0610009B22Rik	60.2234879939433	-0.471815277851012	0.285290590888394	-1.65380595406873	0.0981669458235118	0.189149014425699	5126	chr11	51687907	51688649	743	*	6.56	6.52	6.59	0.07	0.817	0.952	111.42	71.87	77.03	116	Promoter (<=1kb)	11	51685385	51688634	3250	2	66050	uc007iuh.1	0	ENSMUSG00000007777	RIKEN cDNA 0610009B22 gene	uc007iuh.1;uc007iui.1;uc007iuj.1;uc011xuk.1	66050;77371;77371;77371	0;0;0;0	Unchanged	Unchanged	Unchanged
0610009L18Rik	6.60420467226245	-0.514970126037373	0.802246526513463	-0.641910072550163	0.520931573823316	0.656977331469481	7456	chr11	120352188	120354858	2671	*	7.81	7.66	7.95	0.29	0.183	0.524	209.95	195.56	237.73	257	Distal Intergenic	11	120348678	120351190	2513	1	66838	uc007msj.2	3510	ENSMUSG00000043644	RIKEN cDNA 0610009L18 gene	uc033gbw.1;uc007msi.2;uc057bav.1;uc007msj.2	102465564;11465;11465;66838	0;0;0;0	Unchanged	Unchanged	Unchanged
0610010K14Rik	81.1593335521987	0.288809811838473	0.24922712527473	1.15882174350047	0.246528852598048	0.384311053378357	5668	chr11	70236828	70240544	3717	*	8.43	8.33	8.52	0.19	0.37	0.729	367.41	276.62	352.8	381	Promoter (<=1kb)	11	70235204	70238470	3267	2	104457	uc007jud.2	0	ENSMUSG00000020831	RIKEN cDNA 0610010K14 gene	uc033fxl.1;uc007jud.2;uc007jue.2;uc007jug.2;uc007juh.2;uc011xxr.1;uc011xxs.1;uc007juf.2;uc007juj.1;uc007juk.1;uc011xxq.1;uc007jui.2;uc011xxp.1	102465891;104457;104457;104457;104457;104457;104457;104457;11684;11684;387190;52898;751537	0;0;0;0;0;0;0;0;14797;14797;0;0;0	Unchanged	Unchanged	Unchanged
0610012G03Rik	152.071282651481	-0.541814282783116	0.211623211032496	-2.56027814784418	0.010458841709551	0.0305932638552504	14892	chr16	31946842	31950003	3162	*	8.31	8.38	8.23	-0.15	0.476	0.807	378.46	289.15	285.28	315	Promoter (<=1kb)	16	31947051	31948521	1471	2	106264	uc007yxy.2	0	ENSMUSG00000107002	RIKEN cDNA 0610012G03 gene	uc007yxy.2;uc007yxw.2;uc007yxx.2;uc007yxz.2	106264;239827;239827;68092	0;0;0;0	Unchanged	FGF_down	Unchanged
0610030E20Rik	137.405228228785	0.0837168604718459	0.200173098090581	0.418222334921164	0.675784567319177	0.785392565985882	31286	chr6	72346929	72348443	1515	*	7.44	7.3	7.56	0.26	0.297	0.664	186.93	127.86	179.73	198	Promoter (<=1kb)	6	72347317	72353162	5846	1	68364	uc009cig.3	0	ENSMUSG00000058706	RIKEN cDNA 0610030E20 gene	uc009cif.1;uc009cig.3	28035;68364	0;0	Unchanged	Unchanged	Unchanged
0610038B21Rik	7.63602181791387	-0.684854582545008	0.722314624915804	-0.948138884249835	0.34305875518381	0.489036302674589	36352	chr8	77516649	77519115	2467	*	7.88	7.78	7.97	0.2	0.4	0.754	255.07	183.86	273.87	229	Promoter (<=1kb)	8	77517056	77518578	1523	1	70345	uc012ggf.1	0	ENSMUSG00000097882	RIKEN cDNA 0610038B21 gene	uc012ggf.1;uc009mhm.1;uc009mhn.1;uc012gge.1	70345;78514;78514;78514	0;0;0;0	Unchanged	Unchanged	Unchanged
0610040B10Rik	3.10755527901923	-0.257245536919306	1.08848175496965	-0.236334266279437	0.813173299269062	0.883469436675196	30108	chr5	143328390	143330116	1727	*	7.55	7.49	7.61	0.12	0.604	0.877	184.16	174.66	180.68	209	Promoter (<=1kb)	5	143329308	143332704	3397	1	67672	uc009akc.2	0	ENSMUSG00000089889	RIKEN cDNA 0610040B10 gene	uc009akc.2;uc009ajz.2;uc009akb.1	67672;72881;72881	0;0;-3432	Unchanged	Unchanged	Unchanged
0610040F04Rik	12.7570149178101	1.08228237889478	0.618026274386479	1.75119153302855	0.0799129234388361	0.160497271205002	31777	chr6	108660688	108662303	1616	*	6.95	6.66	7.18	0.52	0.0539	0.255	115.1	87.75	137.89	153	Promoter (<=1kb)	6	108577036	108660934	83899	2	75394	uc009ddk.2	0	ENSMUSG00000087341	RIKEN cDNA 0610040F04 gene	uc009ddn.1;uc009ddk.2	20893;75394	0;0	Unchanged	Unchanged	Unchanged
1010001N08Rik	34.2882946189241	0.242530805797097	0.38662579606744	0.627301148200653	0.530461850929538	0.664128359546249	17510	chr18	11046792	11047439	648	*	4.8	4.39	5.12	0.73	0.167	0.5	27.62	14.21	32.33	37	Intron (uc033hfu.1/68434, intron 4 of 5)	18	11042037	11052567	10531	2	68434	uc033hfu.1	5128	ENSMUSG00000097222	RIKEN cDNA 1010001N08 gene	uc033hfu.1;uc008ebh.4;uc008ebi.2	68434;68434;68434	0;0;0	Unchanged	Unchanged	Unchanged
1110002L01Rik	121.817576800182	0.628856287598897	0.246775837829913	2.54828954539839	0.01082525812245	0.0314725091412119	7565	chr12	3423111	3428235	5125	*	9.36	9.26	9.45	0.19	0.32	0.686	681.41	544.88	736.98	658	Promoter (<=1kb)	12	3403883	3426747	22865	2	100043040	uc007mwo.2	0	ENSMUSG00000071456	RIKEN cDNA 1110002L01 gene	uc007mwo.2;uc007mwp.2;uc033gcg.2;uc057kno.1	100043040;100043040;75302;75302	0;0;0;0	Unchanged	FGF_up	Unchanged
1110004F10Rik	628.215594887444	0.324213138823771	0.134454497179297	2.41132238508488	0.0158947916411967	0.043244832619072	34725	chr7	116093319	116094378	1060	*	7.33	7.16	7.48	0.33	0.188	0.531	163.91	121.18	180.68	177	Promoter (<=1kb)	7	116093341	116105210	11870	1	56372	uc009jiw.1	0	ENSMUSG00000030663	RIKEN cDNA 1110004F10 gene	uc009jiw.1;uc009jix.1;uc009jiv.2;uc057luy.1	56372;56372;69350;69350	0;0;0;0	Unchanged	FGF_up	Unchanged
1110006O24Rik	7.64197593014078	0.238055113720616	0.736868666450391	0.323063151629671	0.746647415911959	0.837849020277883	29065	chr5	115631063	115633039	1977	*	7.28	7.1	7.44	0.34	0.187	0.53	151.01	122.85	146.44	201	Promoter (<=1kb)	5	115631049	115631816	768	2	66123	uc008zeh.2	0	ENSMUSG00000107121	RIKEN cDNA 1110006O24 gene	uc008zeh.2;uc008zei.1	66123;77407	0;0	Unchanged	Unchanged	Unchanged
1110008P14Rik	111.539455185454	0.759541708459529	0.223735001635918	3.39482737571622	0.000686718843025632	0.00295665115700373	20638	chr2	32381290	32381844	555	*	5.07	4.62	5.41	0.79	0.0937	0.359	25.78	23.4	36.14	49	Promoter (<=1kb)	2	32379101	32381915	2815	2	73737	uc008jfk.2	71	ENSMUSG00000039195	RIKEN cDNA 1110008P14 gene	uc008jfl.1;uc008jff.2;uc008jfg.2;uc008jfh.2;uc008jfi.2;uc008jfj.2;uc008jfk.2	16819;68379;68379;68379;68379;68379;73737	5895;0;0;0;0;0;0	Unchanged	FGF_up	Unchanged
1110012L19Rik	40.2255172919326	-0.335997317622326	0.335925334121899	-1.00021428422663	0.317206817954519	0.463762188158093	40175	chrX	70385285	70386389	1105	*	6.06	6.15	5.96	-0.19	0.573	0.863	76.43	66.02	66.57	58	Promoter (<=1kb)	20	70385913	70389416	3504	1	68618	uc009tjf.1	0	ENSMUSG00000045237	RIKEN cDNA 1110012L19 gene	uc009tjf.1	68618	0	Unchanged	Unchanged	Unchanged
1110019D14Rik	12.2929828817809	-0.798398373398523	0.56089659772472	-1.42343236995416	0.154610854342846	0.270162124430658	30484	chr6	13873435	13873652	218	*	3.27	3.11	3.41	0.3	0.729	0.928	6.45	10.86	13.31	8	Promoter (1-2kb)	6	13871569	13896421	24853	1	76311	uc009ayu.2	1866	ENSMUSG00000097616	RIKEN cDNA 1110019D14 gene	uc009ayt.2;uc012eid.1;uc009ayu.2;uc009ayv.2	66520;66520;76311;76311	0;0;0;0	Unchanged	Unchanged	Unchanged
1110051M20Rik	170.312347212044	-0.0570598090413603	0.198015571945722	-0.288158191200241	0.773225650577598	0.856264471108053	21377	chr2	91444259	91444629	371	*	3.92	3.45	4.28	0.83	0.222	0.577	10.13	11.7	21.87	17	Promoter (<=1kb)	2	91273240	91444714	171475	2	228356	uc008kvs.2	85	ENSMUSG00000040591	RIKEN cDNA 1110051M20 gene	uc008kvs.2;uc008kvt.2;uc008kvu.2	228356;228356;228356	0;0;0	Unchanged	Unchanged	Unchanged
1190002N15Rik	212.4167607473	0.0510436263681505	0.192869136652809	0.264654196384131	0.791275865554592	0.870087520784625	39199	chr9	94537076	94539517	2442	*	7.1	7.02	7.17	0.15	0.574	0.864	140.89	119.51	124.57	164	Promoter (<=1kb)	9	94517864	94538081	20218	2	68861	uc009rax.1	0	ENSMUSG00000045414	RIKEN cDNA 1190002N15 gene	uc009rax.1	68861	0	Unchanged	Unchanged	Unchanged
1190007I07Rik	24.9138159291734	-0.73668264557186	0.457518516732435	-1.61017012127333	0.107360722286535	0.203355840375384	3639	chr10	82622331	82623888	1558	*	6.82	6.6	7.02	0.42	0.163	0.494	116.94	76.89	108.41	151	Promoter (<=1kb)	10	82619851	82623228	3378	2	544717	uc007gjp.2	0	ENSMUSG00000063320	RIKEN cDNA 1190007I07 gene	uc007gjp.2;uc011xjp.1;uc011xjq.1	544717;544717;544717	0;0;0	Unchanged	Unchanged	Unchanged
1300002E11Rik	24.4035171638122	0.222770507550093	0.435284412821262	0.511781495014313	0.608803942794827	0.730051642849782	14667	chr16	21793907	21795190	1284	*	6.4	6.44	6.36	-0.07	0.823	0.954	100.37	72.71	88.44	76	Promoter (<=1kb)	16	21794347	21806125	11779	1	100043489	uc007yrn.2	0	ENSMUSG00000097290	RIKEN cDNA 1300002E11 gene	uc007yrn.2;uc007yro.2;uc007yrp.3;uc057kuz.1	100043489;100043489;100043489;100043489	0;0;0;0	Unchanged	Unchanged	Unchanged
1500011B03Rik	91.6878049436252	0.22038884616886	0.231489251118083	0.952047860124787	0.341072710047561	0.487270025159987	28991	chr5	114812997	114814000	1004	*	6.85	6.8	6.89	0.09	0.748	0.932	132.6	90.26	113.16	124	Promoter (<=1kb)	5	114808196	114813976	5781	2	66236	uc008zah.2	0	ENSMUSG00000072694	RIKEN cDNA 1500011B03 gene	uc008zah.2;uc008zai.2	66236;66236	0;0	Unchanged	Unchanged	Unchanged
1600002K03Rik	78.9334722469801	0.0567897248555387	0.245912733483906	0.230934462201224	0.817365717294194	0.886493199010908	3459	chr10	80172209	80173726	1518	*	6.56	6.34	6.75	0.41	0.157	0.484	83.79	78.56	107.46	108	Promoter (<=1kb)	10	80172944	80175119	2176	1	69770	uc007gcf.1	0	ENSMUSG00000035595	RIKEN cDNA 1600002K03 gene	uc007gce.1;uc007gcf.1	12696;69770	0;0	Unchanged	Unchanged	Unchanged
1600012H06Rik	362.479765380845	0.568175239454571	0.202355130039307	2.80781238085837	0.00498792774107666	0.0163285982912485	15799	chr17	14942147	14944198	2052	*	7.31	7.24	7.37	0.13	0.602	0.876	162.06	141.23	155.95	175	Promoter (<=1kb)	17	14943184	14945939	2756	1	67912	uc008ang.1	0	ENSMUSG00000050088	RIKEN cDNA 1600012H06 gene	uc008ang.1;uc008anh.1;uc008ani.1;uc012ako.1;uc008anc.1;uc008anf.1;uc008anj.3;uc029tag.2	67912;67912;67912;67912;71682;71682;72057;72057	0;0;0;0;0;0;12666;0	Unchanged	FGF_up	Unchanged
1600014C10Rik	165.015710492978	-1.24094231333492	0.226617307553816	-5.47593794459071	4.35200194145767e-08	5.06733288328354e-07	33381	chr7	38182840	38184219	1380	*	6.71	6.88	6.53	-0.35	0.264	0.627	144.57	91.09	105.55	79	Promoter (<=1kb)	7	38183217	38197568	14352	1	72244	uc009gks.2	0	ENSMUSG00000054676	RIKEN cDNA 1600014C10 gene	uc009gks.2;uc009gkt.2	72244;72244	0;0	Unchanged	FGF_down	Unchanged
1600014C23Rik	4.80722584830064	0.827103485481514	0.899861772429752	0.919145040741335	0.358019713214718	0.504188949256781	16649	chr17	45733293	45737351	4059	*	8.79	7.83	9.36	1.53	1.97e-11	5.65e-09	279.93	174.66	616.21	700	Promoter (<=1kb)	17	45732864	45733844	981	2	72240	uc008crk.1	0	ENSMUSG00000094690	RIKEN cDNA 1600014C23 gene	uc008crk.1	72240	0	FGF_up	Unchanged	Unchanged
1600020E01Rik	79.2188291973076	0.56113148500752	0.29208939450755	1.92109503309274	0.054719727687111	0.118409365024184	31491	chr6	86528526	86528764	239	*	3.42	3.28	3.55	0.27	0.731	0.928	11.05	8.36	10.46	13	Promoter (2-3kb)	6	86526271	86564449	38179	1	72012	uc009csd.1	2255	ENSMUSG00000097048	RIKEN cDNA 1600020E01 gene	uc009csc.2;uc009csd.1;uc029vxh.1;uc009cse.1	23983;72012;72012;72012	0;0;0;0	Unchanged	Unchanged	Unchanged
1700001G11Rik	5.60763318384048	0.00789835178628566	0.955927723017964	0.008262498927586	0.993407554681933	0.99640878596496	11901	chr14	66297050	66298765	1716	*	6.94	7.01	6.86	-0.15	0.583	0.868	144.57	113.66	118.87	114	Promoter (<=1kb)	14	66295327	66297129	1803	2	69303	uc007ukb.3	0	ENSMUSG00000085984	RIKEN cDNA 1700001G11 gene	uc007ukc.1;uc007ukd.1;uc007ukb.3	66854;66854;69303	0;0;0	Unchanged	Unchanged	Unchanged
1700001L05Rik	244.194607983315	0.728764835347582	0.181344415754123	4.01867811764153	5.85255581736912e-05	0.000339561879267941	13728	chr15	83366598	83367320	723	*	5.46	5	5.81	0.81	0.0482	0.238	30.39	33.43	53.25	59	Promoter (<=1kb)	15	83353847	83367297	13451	2	69291	uc007xaz.2	0	NA	RIKEN cDNA 1700001L05 gene	uc007xaz.2;uc007xax.1;uc007xay.2	69291;69291;69291	0;0;0	Unchanged	FGF_up	Unchanged
1700001O22Rik	16.1375666804436	-0.870160812615569	0.495419637961723	-1.75641162751566	0.0790181488822805	0.159181681348562	20542	chr2	30794462	30796977	2516	*	7.18	7.12	7.23	0.11	0.699	0.917	176.8	101.96	148.35	152	3' UTR	2	30795563	30801737	6175	2	73598	uc008jcr.3	4760	ENSMUSG00000044320	RIKEN cDNA 1700001O22 gene	uc008jcr.3;uc008jcs.3;uc008jct.3	73598;73598;73598	0;0;0	Unchanged	Unchanged	Unchanged
1700001P01Rik	4.02555496181225	0.675193422028662	1.10257911060108	0.612376395976317	0.540288755005685	0.672869771785761	6567	chr11	97777173	97777508	336	*	3.33	2.3	3.92	1.61	0.0665	0.292	7.37	2.51	15.22	15	Promoter (1-2kb)	11	97771481	97775918	4438	2	72215	uc007let.1	-1255	ENSMUSG00000018543	RIKEN cDNA 1700001P01 gene	uc011ydw.1;uc007leu.2;uc007lev.1;uc007let.1	100302498;65019;65019;72215	0;0;0;-1255	Unchanged	Unchanged	Unchanged
1700007F19Rik	4.37077062155976	0.973013938908275	1.04685535390732	0.929463593300228	0.352648884282205	0.498269235718278	23575	chr3	58162030	58164889	2860	*	7.51	7.3	7.69	0.39	0.109	0.392	183.24	131.21	198.75	214	Promoter (<=1kb)	3	58141707	58163807	22101	2	67850	uc008pho.1	0	ENSMUSG00000100666	RIKEN cDNA 1700007F19 gene	uc008pho.1	67850	0	Unchanged	Unchanged	Unchanged
1700007L15Rik	3.76273992908218	-0.423581734853642	1.10344699426671	-0.383871393056929	0.701073770022962	0.803202081815448	14962	chr16	33379514	33382587	3074	*	8.67	8.62	8.71	0.1	0.635	0.89	450.28	335.12	407.95	432	Promoter (<=1kb)	16	33379854	33380736	883	2	100502742	uc007zaa.2	0	ENSMUSG00000097318	RIKEN cDNA 1700007L15 gene	uc007zaa.2;uc007zab.1	100502742;22661	0;0	Unchanged	Unchanged	Unchanged
1700008O03Rik	4.13948550617788	-1.01259581400935	0.999898204905644	-1.01269890178961	0.311204002592362	0.457504334438365	33445	chr7	44373707	44375048	1342	*	5.89	6.08	5.68	-0.4	0.287	0.654	81.03	54.32	46.6	56	Promoter (<=1kb)	7	44360043	44375030	14988	2	69349	uc009gpf.3	0	ENSMUSG00000008028	RIKEN cDNA 1700008O03 gene	uc009gpf.3	69349	0	Unchanged	Unchanged	Unchanged
1700017B05Rik	781.034834257199	-0.209438151513958	0.177965243067585	-1.17684862450597	0.239255930876254	0.375915194667147	38359	chr9	57260649	57263283	2635	*	8.79	8.78	8.8	0.02	0.927	0.982	514.74	366.04	392.74	500	Promoter (<=1kb)	9	57252322	57262599	10278	2	74211	uc009puq.2	0	ENSMUSG00000032300	RIKEN cDNA 1700017B05 gene	uc009puq.2;uc009pur.2;uc009pus.2	74211;74211;74211	0;0;0	Unchanged	Unchanged	Unchanged
1700020A23Rik	2.92769663312257	0.25963221292373	1.32995723168557	0.195218467735746	0.845221922033775	0.903799604771659	22065	chr2	130402004	130402606	603	*	4.2	3.89	4.45	0.56	0.367	0.726	12.89	16.71	24.72	19	Promoter (2-3kb)	2	130405259	130406074	816	1	75656	uc012cee.1	-2653	ENSMUSG00000027409	RIKEN cDNA 1700020A23 gene	uc008mir.2;uc008mit.1;uc012cee.1;uc008mis.1	56264;66766;75656;75656	-4375;-3916;-2653;-2690	Unchanged	Unchanged	Unchanged
1700020I14Rik	153.013541138324	-0.144520357567518	0.19881382157183	-0.726913030617968	0.467279234192932	0.610040568768314	21741	chr2	119593513	119595546	2034	*	7.65	7.65	7.66	0.01	0.955	0.99	204.42	196.39	185.43	219	Promoter (<=1kb)	2	119594296	119600746	6451	1	66602	uc008ltx.3	0	ENSMUSG00000085438	RIKEN cDNA 1700020I14 gene	uc008ltx.3;uc008lty.3	66602;66602	0;0	Unchanged	Unchanged	Unchanged
1700021F05Rik	125.342971264283	-0.192338608557963	0.212528792001878	-0.9050002437141	0.365465258078365	0.511480183202883	2898	chr10	43539842	43541017	1176	*	7.17	7.15	7.2	0.04	0.863	0.965	160.22	124.52	152.15	141	Promoter (<=1kb)	10	43525121	43540994	15874	2	67851	uc007ezk.1	0	ENSMUSG00000019797	RIKEN cDNA 1700021F05 gene	uc007ezk.1	67851	0	Unchanged	Unchanged	Unchanged
1700025G04Rik	660.676985054285	0.332654211727903	0.16644799279726	1.99854745099323	0.0456573409423641	0.10227884080034	1466	chr1	152088222	152090531	2310	*	7.54	7.45	7.63	0.18	0.478	0.809	201.66	147.92	166.41	230	Promoter (<=1kb)	1	151852403	152090320	237918	2	69399	uc007czd.2	0	ENSMUSG00000032666	RIKEN cDNA 1700025G04 gene	uc007czd.2;uc007cze.2	69399;69399	0;0	Unchanged	Unchanged	Unchanged
1700030K09Rik	51.5133540203554	-0.178731221718741	0.308541574270597	-0.579277597002181	0.562401879431855	0.692509613092308	36301	chr8	72443955	72444260	306	*	4.22	4.11	4.33	0.21	0.741	0.931	12.89	21.73	17.12	23	Promoter (<=1kb)	8	72443880	72460541	16662	1	72254	uc009mfy.2	75	ENSMUSG00000052794	RIKEN cDNA 1700030K09 gene	uc009mfy.2;uc009mfz.1;uc009mfx.1	72254;72254;73316	0;-490;0	Unchanged	Unchanged	Unchanged
1700034H15Rik	36.4692872528972	0.0362510626304998	0.392331759057419	0.0923990010841675	0.926381033054059	0.956388192715048	2257	chr1	191905934	191906519	586	*	5.98	6.07	5.89	-0.18	0.611	0.88	76.43	57.66	54.2	64	Promoter (1-2kb)	1	191894072	191907527	13456	2	98736	uc007edb.2	1008	ENSMUSG00000055833	RIKEN cDNA 1700034H15 gene	uc007edc.1;uc007eda.1;uc007edb.2	22782;98736;98736	0;0;0	Unchanged	Unchanged	Unchanged
1700034P13Rik	18.5115412091848	-0.352937859642195	0.501096890974508	-0.704330571590296	0.48122693189008	0.621765579192616	26	chr1	9748662	9748936	275	*	3.81	3.73	3.88	0.15	0.837	0.959	16.57	10.03	10.46	19	Promoter (1-2kb)	1	9747648	9771256	23609	1	73331	uc029qmu.1	1014	NA	RIKEN cDNA 1700034P13 gene	uc007ags.3;uc029qmu.1;uc029qmv.1	70675;73331;73331	0;0;0	Unchanged	Unchanged	Unchanged
1700037C18Rik	9.60839109927437	0.144143768882341	0.63472051199164	0.22709801583384	0.820347526881729	0.888356767354392	14294	chr16	3908323	3909944	1622	*	7.11	7.11	7.11	0	0.995	0.999	160.22	117	146.44	130	Promoter (<=1kb)	16	3905798	3908689	2892	2	73261	uc007xyz.1	0	ENSMUSG00000005983	RIKEN cDNA 1700037C18 gene	uc007xyx.1;uc007xyz.1;uc007xyw.1;uc056zat.1;uc007xyy.1;uc007xza.1;uc012aao.1;uc007xzb.1	105246059;73261;74763;74763;74763;76779;76779;76779	-566;0;0;0;6274;0;0;0	Unchanged	Unchanged	Unchanged
1700037H04Rik	280.672134478132	-0.0712752542990769	0.182200143481722	-0.391192086554132	0.695655257212679	0.799161056728753	22103	chr2	131159322	131160037	716	*	6.39	6.16	6.59	0.43	0.166	0.497	79.19	63.51	88.44	104	Promoter (<=1kb)	2	131146315	131160081	13767	2	67326	uc008mks.2	44	ENSMUSG00000027327	RIKEN cDNA 1700037H04 gene	uc008mks.2;uc008mkt.2;uc008mku.2	67326;67326;67326	0;0;0	Unchanged	Unchanged	Unchanged
1700061G19Rik	16.1035624660285	0.265284201926745	0.519565774729843	0.510588292819487	0.609639375247131	0.73061363811829	16890	chr17	56883107	56884219	1113	*	5.94	6.02	5.85	-0.17	0.647	0.896	76.43	53.49	49.45	66	Exon (uc008ddj.1/78625, exon 9 of 14)	17	56875633	56888838	13206	1	78625	uc008ddj.1	7474	ENSMUSG00000024209	RIKEN cDNA 1700061G19 gene	uc008ddj.1	78625	0	Unchanged	Unchanged	Unchanged
1700066M21Rik	84.5827106975692	-0.33510712920127	0.234571463514619	-1.42859290802176	0.153121273716343	0.268225921655831	338	chr1	57377112	57378284	1173	*	6.13	6.36	5.86	-0.5	0.183	0.523	107.74	56.83	53.25	63	Promoter (<=1kb)	1	57377620	57385423	7804	1	73467	uc007bay.3	0	ENSMUSG00000038323	RIKEN cDNA 1700066M21 gene	uc007bay.3;uc007bax.1	73467;75323	0;0	Unchanged	Unchanged	Unchanged
1700088E04Rik	68.4798327373479	0.725392556031636	0.297093260256232	2.4416324874082	0.014621022383123	0.0403860548932485	13513	chr15	79140691	79141213	523	*	4.52	4.37	4.66	0.28	0.606	0.878	23.94	17.55	28.53	22	Promoter (<=1kb)	15	79134655	79141176	6522	2	27660	uc007wsr.1	0	ENSMUSG00000033029	RIKEN cDNA 1700088E04 gene	uc007wso.3;uc057kug.1;uc007wsp.3;uc007wsq.3;uc007wsr.1;uc007wss.1;uc011zvx.1;uc011zvy.1;uc057bgm.1;uc007wst.2	27008;27008;27008;27008;27660;27660;27660;27660;27660;69833	0;0;0;0;0;0;0;0;0;0	Unchanged	FGF_up	Unchanged
1700096K18Rik	4.16783830057532	-0.092466852848898	0.944778460984758	-0.0978714658169898	0.922034358160765	0.953708028768974	27867	chr5	25529816	25530987	1172	*	7.67	7.7	7.65	-0.05	0.831	0.957	231.13	183.86	197.8	203	Promoter (<=1kb)	5	25530018	25531466	1449	1	73571	uc012dtm.1	0	ENSMUSG00000101856	RIKEN cDNA 1700096K18 gene	uc012dtm.1	73571	0	Unchanged	Unchanged	Unchanged
1700101I11Rik	4.75413913762389	1.23607535357446	0.9281216459395	1.33180317362734	0.182924874834366	0.306550491309639	32234	chr6	129532702	129534851	2150	*	8.67	8.46	8.86	0.4	0.0342	0.191	368.33	335.95	466.91	461	Promoter (<=1kb)	6	129532184	129533284	1101	2	100504641	uc009efy.2	0	ENSMUSG00000097675	RIKEN cDNA 1700101I11 gene	uc009efy.2;uc009efz.1;uc009ega.1	100504641;57436;57436	0;0;0	Unchanged	Unchanged	Unchanged
1700102H20Rik	2.80150967192229	-0.634624249663399	1.2816771384414	-0.495151415773197	0.620493242488756	0.739690328568284	15618	chr17	3558006	3559010	1005	*	6.25	6.25	6.25	0.01	0.977	0.995	79.19	72.71	82.73	70	Promoter (<=1kb)	17	3557824	3559863	2040	1	68230	uc008aet.2	182	ENSMUSG00000116852	RIKEN cDNA 1700102H20 gene	uc008aes.1;uc008aet.2;uc008aeu.2	224481;68230;68230	0;0;0	Unchanged	Unchanged	Unchanged
1700113A16Rik	8.9383179968888	-1.34338597960207	0.700654263178482	-1.91733077239532	0.0551959229125587	0.119158097962186	23930	chr3	88176666	88178695	2030	*	8.33	8.24	8.42	0.18	0.397	0.751	348.07	255.73	353.75	331	Promoter (<=1kb)	3	88171560	88177785	6226	2	76642	uc008pue.2	0	ENSMUSG00000096935	RIKEN cDNA 1700113A16 gene	uc008ptz.2;uc008pua.2;uc008pub.2;uc008pue.2;uc008puf.2	17261;17261;17261;76642;76642	0;0;0;0;0	Unchanged	Unchanged	Unchanged
1700120C14Rik	9.40750446194329	-0.205502151617471	0.637850972548111	-0.322178942201065	0.747317136366292	0.838059481400514	14038	chr15	99255442	99255750	309	*	4.02	4.35	3.6	-0.76	0.261	0.623	17.5	23.4	15.22	9	Intron (uc007xpe.2/73600, intron 1 of 2)	15	99251788	99262041	10254	1	73600	uc007xpe.2	3654	ENSMUSG00000100599	RIKEN cDNA 1700120C14 gene	uc007xpb.2;uc007xpc.2;uc007xpe.2	51812;51812;73600	0;0;0	Unchanged	Unchanged	Unchanged
1700123M08Rik	11.0112489566208	2.47929138616483	0.718720752940478	3.44958925427072	0.000561440097448355	0.00247979750358564	25167	chr4	11966632	11967439	808	*	6.4	6.45	6.35	-0.11	0.753	0.935	97.61	77.72	97.95	65	Promoter (<=1kb)	4	11966574	11994295	27722	1	100503636	uc008sac.2	58	NA	RIKEN cDNA 1700123M08 gene	uc008sac.2;uc008sad.2;uc008rzz.2;uc056zvd.1;uc056zve.1;uc008saa.2;uc008sab.2	100503636;100503636;381511;381511;381511;381511;381511	0;0;0;0;0;0;0	Unchanged	FGF_up	Unchanged
1810010H24Rik	7.29320499949698	-1.66854424136012	0.773332711431665	-2.1576020472109	0.0309587854016759	0.0747967259189065	6985	chr11	107027459	107029152	1694	*	7.02	7.19	6.82	-0.37	0.158	0.485	147.33	144.58	103.65	123	Promoter (<=1kb)	11	107028223	107030443	2221	1	69066	uc007mab.3	0	ENSMUSG00000078607	RIKEN cDNA 1810010H24 gene	uc007mac.1;uc007mae.2;uc007mab.3	207165;207165;69066	0;0;0	Unchanged	Unchanged	Unchanged
1810013L24Rik	406.387269705424	0.959003503939054	0.189988176338295	5.04770098025174	4.47158273861381e-07	4.27213084667564e-06	14382	chr16	8830066	8831743	1678	*	8.4	8.52	8.28	-0.24	0.305	0.671	430.94	300.85	269.12	351	Promoter (<=1kb)	16	8830100	8858924	28825	1	69053	uc007yda.2	0	ENSMUSG00000022507	RIKEN cDNA 1810013L24 gene	uc007yda.2	69053	0	Unchanged	FGF_up	Unchanged
1810014B01Rik	9.15263852890214	-1.25886025950987	0.664169613310051	-1.89538972317031	0.0580407891882543	0.124030665542288	3725	chr10	86685072	86686466	1395	*	6.64	6.64	6.64	0	0.991	0.998	119.71	79.39	91.29	108	Promoter (<=1kb)	10	86685527	86689954	4428	1	66263	uc007gqe.2	0	ENSMUSG00000097412	RIKEN cDNA 1810014B01 gene	uc007gqi.1;uc007gqe.2;uc007gqf.1;uc007gqg.1;uc007gqh.1	22027;66263;66263;66263;66263	0;0;0;0;0	Unchanged	Unchanged	Unchanged
1810030O07Rik	349.150053412473	-0.039043447652858	0.182622211477602	-0.213793532215804	0.830708068894706	0.894376790755838	39933	chrX	12673209	12673590	382	*	5.11	5.2	5.01	-0.19	0.693	0.915	46.04	27.58	29.48	35	Promoter (<=1kb)	20	12654879	12673639	18761	2	69155	uc009sqy.3	49	ENSMUSG00000044148	RIKEN cDNA 1810030O07 gene	uc009sqz.1;uc009sqy.3	26896;69155	0;0	Unchanged	Unchanged	Unchanged
1810032O08Rik	385.699498721531	0.384444000611614	0.152191562943054	2.52605330530355	0.0115351977346184	0.0331176275100069	7255	chr11	116675634	116676283	650	*	4.45	4.73	4.1	-0.63	0.275	0.64	30.39	22.56	15.22	19	Exon (uc007mly.2/66293, exon 6 of 6)	11	116671660	116675798	4139	1	66293	uc007mly.2	3974	ENSMUSG00000020812	RIKEN cDNA 1810032O08 gene	uc011yhz.1;uc011yhy.1;uc011yia.1;uc007mma.1;uc007mly.2;uc007mlz.2;uc011yhx.1	100216531;100216536;100216538;20446;66293;66293;66293	0;0;0;18377;0;0;0	Unchanged	FGF_up	Unchanged
1810034E14Rik	4.56561529395699	-0.00819070302549398	0.942844727305069	-0.00868722366290942	0.993068685545139	0.996284828468746	10227	chr13	64248598	64249279	682	*	5.85	5.64	6.03	0.38	0.288	0.655	51.57	48.47	69.42	61	Promoter (<=1kb)	13	64248700	64268145	19446	1	66503	uc007qys.1	0	ENSMUSG00000097101	RIKEN cDNA 1810034E14 gene	uc007qym.2;uc007qyo.2;uc007qyp.2;uc007qyq.2;uc007qyr.2;uc007qys.1	218294;218294;218294;218294;218294;66503	0;-60;0;0;0;0	Unchanged	Unchanged	Unchanged
1810037I17Rik	254.077902839232	0.0564783559556358	0.213596494871047	0.264416117828773	0.791459293129829	0.870087520784625	24648	chr3	122923095	122925303	2209	*	6.96	7.06	6.86	-0.19	0.463	0.798	142.73	123.68	114.11	119	Promoter (<=1kb)	3	122924397	122926194	1798	1	67704	uc008rey.1	0	ENSMUSG00000054091	RIKEN cDNA 1810037I17 gene	uc008rey.1;uc029uom.1	67704;74057	0;0	Unchanged	Unchanged	Unchanged
1810043G02Rik	98.6232990024801	-0.729014538879665	0.231124238417566	-3.15421066985875	0.00160932866311361	0.00617882948330674	3371	chr10	77978671	77978885	215	*	3.9	3.93	3.88	-0.06	0.93	0.983	13.81	16.71	12.36	17	Promoter (<=1kb)	10	77978650	77985438	6789	1	67884	uc007fwn.1	21	ENSMUSG00000020284	RIKEN cDNA 1810043G02 gene	uc007fwn.1;uc029qzt.1;uc011xhq.1	67884;67884;67884	0;0;-2699	Unchanged	FGF_down	Unchanged
1810044D09Rik	4.49371716024274	-0.39807978679861	0.934011571475405	-0.42620434152629	0.669958954210921	0.780494053745644	31623	chr6	91440489	91441466	978	*	6.02	5.91	6.13	0.23	0.502	0.824	58.01	61.84	68.47	72	Promoter (<=1kb)	6	91440987	91441755	769	1	69798	uc009cya.2	0	ENSMUSG00000100680	RIKEN cDNA 1810044D09 gene	uc009cya.2;uc029vxr.1	69798;75787	0;0	Unchanged	Unchanged	Unchanged
1810058I24Rik	837.194765721863	0.809689911681691	0.159026748958517	5.09153282063826	3.55180374681705e-07	3.4739082145628e-06	30835	chr6	35251796	35254019	2224	*	8.89	8.69	9.07	0.38	0.048	0.237	445.68	382.75	504	571	Promoter (<=1kb)	6	35252699	35262059	9361	1	67705	uc009bin.2	0	ENSMUSG00000073155	RIKEN cDNA 1810058I24 gene	uc009bin.2;uc057lpn.1;uc057lpo.1;uc009bio.2;uc057lpp.1;uc009bik.3;uc009bil.2	67705;67705;67705;67705;67705;70699;70699	0;0;0;0;0;0;46749	Unchanged	FGF_up	Unchanged
1810062G17Rik	9.48522435747147	-0.134262981473164	0.643418454339926	-0.208671325119052	0.834704826577875	0.896508146349851	23388	chr3	36475966	36480511	4546	*	8.64	8.61	8.68	0.07	0.744	0.932	385.82	395.29	466.91	351	Promoter (<=1kb)	3	36475937	36482299	6363	1	72282	uc029uli.1	29	ENSMUSG00000027713	RIKEN cDNA 1810062G17 gene	uc033hsz.1;uc008ozj.3;uc029uli.1	102466786;11747;72282	0;0;0	Unchanged	Unchanged	Unchanged
1810062O18Rik	2.90350235042174	0.755021636284973	1.11644690536542	0.676271869854704	0.498868049295692	0.638095862908109	11011	chr14	20545250	20546539	1290	*	6.65	6.59	6.7	0.12	0.694	0.915	108.66	83.57	93.19	115	Promoter (<=1kb)	14	20546293	20570680	24388	1	75602	uc007ska.1	0	ENSMUSG00000084925	RIKEN cDNA 1810062O18 gene	uc007sjx.3;uc007sjy.3;uc057bef.1;uc007sjz.2;uc007ska.1;uc007skb.1	19056;19056;19056;19056;75602;78787	0;0;0;0;0;0	Unchanged	Unchanged	Unchanged
1810064F22Rik	2.98626898152778	-2.93695259947553	1.40582849212576	-2.08912581863706	0.0366963987870296	0.085881213687601	37840	chr9	22213154	22214781	1628	*	6	6.64	4.82	-1.82	6.21e-07	4.12e-05	102.21	97.78	26.63	30	Promoter (<=1kb)	9	22206786	22213860	7075	2	69862	uc009ooe.1	0	ENSMUSG00000090925	RIKEN cDNA 1810064F22 gene	uc009ooe.1	69862	0	FGF_down	Unchanged	Unchanged
2010001A14Rik	18.1286859872862	-0.630476911695096	0.468522965221899	-1.34566917418123	0.178409231962402	0.300839043512222	5286	chr11	57800424	57801445	1022	*	5.92	5.76	6.06	0.3	0.426	0.773	60.77	47.64	52.3	81	Promoter (<=1kb)	11	57795499	57801467	5969	2	76516	uc007jad.2	22	ENSMUSG00000087165	RIKEN cDNA 2010001A14 gene	uc007jae.1;uc007jad.2;uc057klc.1	50724;76516;76516	0;0;0	Unchanged	Unchanged	Unchanged
2010003K11Rik	4.04189784932241	-1.18880267467815	1.052127532945	-1.12990358816158	0.258516851855757	0.398015382375371	18712	chr19	4497930	4498932	1003	*	5.55	5.71	5.38	-0.32	0.46	0.797	62.62	41.79	29.48	54	Promoter (<=1kb)	19	4496788	4498583	1796	2	69861	uc008gae.1	0	ENSMUSG00000042041	RIKEN cDNA 2010003K11 gene	uc008gae.1	69861	0	Unchanged	Unchanged	Unchanged
2010109I03Rik	6.88859622634579	0.827141726442925	0.873539566249864	0.946885245271571	0.343697257222146	0.489462382062747	13249	chr15	74891597	74892008	412	*	4.42	3.76	4.87	1.11	0.0564	0.263	11.97	15.04	29.48	29	Distal Intergenic	15	74878336	74881704	3369	2	67038	uc007wgg.1	-9893	ENSMUSG00000063522	RIKEN cDNA 2010109I03 gene	NA	NA	NA	Unchanged	Unchanged	Unchanged
2010111I01Rik	192.150589848345	0.479413502651393	0.210007014281199	2.2828451911109	0.0224394889300736	0.0575282650562506	10195	chr13	63238822	63243579	4758	*	8.98	8.71	9.2	0.5	0.0141	0.104	484.35	351	581.02	598	Promoter (<=1kb)	13	63240029	63302877	62849	1	72061	uc007qxk.2	0	ENSMUSG00000021458	RIKEN cDNA 2010111I01 gene	uc007qxj.2;uc033gmg.1;uc007qxi.2;uc007qxk.2;uc033gmh.1	72061;72061;72061;72061;72061	0;0;0;0;0	Unchanged	Unchanged	Unchanged
2010204K13Rik	29.746207427662	-0.0474174246423693	0.371461899561461	-0.127650843056446	0.898425293283125	0.937814769023572	39864	chrX	7422648	7422947	300	*	3.86	3.74	3.98	0.24	0.742	0.931	17.5	9.19	9.51	22	Promoter (<=1kb)	20	7411817	7422988	11172	2	68355	uc009slh.2	41	NA	RIKEN cDNA 2010204K13 gene	uc009slg.2;uc009slh.2;uc009sli.2	68355;68355;68355	-1601;0;0	Unchanged	Unchanged	Unchanged
2010315B03Rik	41.9231847912593	-0.300218672879564	0.314312680515806	-0.95515927765589	0.339497155746376	0.485632840541556	39836	chr9	124311622	124312949	1328	*	6.66	6.71	6.6	-0.11	0.707	0.92	109.58	99.45	94.14	100	Promoter (<=1kb)	9	124291804	124312694	20891	2	630836	uc029xgv.1	0	ENSMUSG00000074829	RIKEN cDNA 2010315B03 gene	uc029xgv.1;uc029xgw.1;uc057maz.1;uc057mba.1	630836;630836;630836;630836	0;0;0;0	Unchanged	Unchanged	Unchanged
2200002D01Rik	37.8474085138371	0.262128836873406	0.387886762085608	0.675787014395592	0.499175880490153	0.638227441550953	33208	chr7	29247633	29248751	1119	*	6.05	5.82	6.25	0.43	0.205	0.554	52.49	60.17	77.98	74	Promoter (<=1kb)	7	29247521	29248467	947	2	72275	uc009gbj.2	0	ENSMUSG00000030587	RIKEN cDNA 2200002D01 gene	uc009gbj.2;uc009gbh.2;uc009gbi.2	72275;77254;77254	0;0;0	Unchanged	Unchanged	Unchanged
2210016L21Rik	123.000427726769	-0.484675221066498	0.19902596712851	-2.43523610541506	0.0148820755173081	0.040955691131215	28999	chr5	114942003	114942868	866	*	6.4	6.26	6.54	0.28	0.357	0.718	70.9	81.9	98.9	87	Promoter (<=1kb)	5	114942202	114948540	6339	1	72357	uc008zcy.1	0	ENSMUSG00000029559	RIKEN cDNA 2210016L21 gene	uc008zcv.1;uc008zcw.1;uc057bvc.1;uc008zcy.1	231655;231655;231655;72357	0;0;7490;0	Unchanged	FGF_down	Unchanged
2210406O10Rik	26.6037558328141	4.06821799517969	0.606073274297581	6.71241938508941	1.91423565495973e-11	3.82591045954493e-10	28179	chr5	36464036	36464851	816	*	5.95	5.33	6.38	1.05	0.00494	0.0496	46.96	33.43	98.9	68	Promoter (<=1kb)	5	36447611	36464854	17244	2	76710	uc008xen.2	3	ENSMUSG00000039563	RIKEN cDNA 2210406O10 gene	uc008xep.1;uc008xen.2;uc056zzm.1;uc008xeo.3	17713;76710;76710;76710	-334;0;0;0	FGF_up	FGF_up	FGF_up
2300009A05Rik	22.2582436775761	-0.010986388014284	0.424846344403612	-0.0258596741127817	0.979369264677301	0.989051242198826	38560	chr9	63398035	63400222	2188	*	8.07	8.12	8.01	-0.11	0.607	0.878	309.4	248.2	249.15	267	Promoter (<=1kb)	9	63394447	63399244	4798	2	69478	uc009qba.2	0	ENSMUSG00000032403	RIKEN cDNA 2300009A05 gene	uc009qba.2	69478	0	Unchanged	Unchanged	Unchanged
2310009B15Rik	27.6861867714429	-0.25974156209811	0.393370750065593	-0.6602970913694	0.509063196302073	0.647061929405762	1390	chr1	138856411	138856850	440	*	5.22	5.35	5.07	-0.27	0.55	0.851	48.8	32.59	32.33	35	Promoter (<=1kb)	1	138851979	138856519	4541	2	69549	uc007cvv.1	0	ENSMUSG00000079283	RIKEN cDNA 2310009B15 gene	uc007cvv.1;uc007cvw.1	69549;69549	0;0	Unchanged	Unchanged	Unchanged
2310010J17Rik	4.27239969294633	-0.556302734020531	0.948889966009072	-0.586266852794619	0.557696202426603	0.688538371083429	34081	chr7	90125060	90125926	867	*	5.09	5.36	4.77	-0.58	0.21	0.562	45.12	36.77	25.68	29	Intron (uc009ign.2/78329, intron 3 of 3)	7	90124836	90129474	4639	2	78329	uc009ign.2	3548	ENSMUSG00000097162	RIKEN cDNA 2310010J17 gene	uc009igp.1;uc009igq.2;uc009igr.2;uc009igs.2;uc009igt.2;uc009igu.2;uc009igv.2;uc009ign.2;uc009igo.2;uc057lur.1	233489;233489;233489;233489;233489;233489;233489;78329;78329;78329	0;0;0;0;0;0;0;0;0;0	Unchanged	Unchanged	Unchanged
2310011J03Rik	187.556212986583	0.326904224193703	0.187450249813326	1.74395192601373	0.0811674729880559	0.162416480353799	3473	chr10	80319733	80321030	1298	*	5.96	5.77	6.13	0.36	0.311	0.676	58.93	50.14	62.76	77	Promoter (<=1kb)	10	80318255	80320548	2294	2	66374	uc007gcq.1	0	ENSMUSG00000020133	RIKEN cDNA 2310011J03 gene	uc007gcr.2;uc007gcs.2;uc011xiq.1;uc007gcp.1;uc007gcq.1	18551;18551;18551;23805;66374	0;0;0;17913;0	Unchanged	Unchanged	Unchanged
2310015A10Rik	30.136610281983	-0.96883639066303	0.383139062439973	-2.52868079932418	0.0114492100644686	0.0328865558016171	8483	chr12	80130153	80133195	3043	*	8.24	8.31	8.17	-0.14	0.515	0.831	352.67	284.14	250.1	326	Promoter (<=1kb)	12	80120546	80132844	12299	2	69548	uc007oan.2	0	NA	RIKEN cDNA 2310015A10 gene	uc007oan.2;uc007oam.1	69548;69548	0;0	Unchanged	FGF_down	Unchanged
2310022A10Rik	257.321925334833	0.0675845598322211	0.166472323910469	0.405980755507259	0.684756740580592	0.792074838421578	33086	chr7	27559571	27561575	2005	*	7.14	7.19	7.09	-0.1	0.71	0.921	172.19	120.34	124.57	148	Promoter (<=1kb)	7	27560476	27573327	12852	1	66367	uc009fwp.2	0	ENSMUSG00000049643	RIKEN cDNA 2310022A10 gene	uc009fwo.4;uc009fwp.2;uc009fwq.3	66367;66367;66367	0;0;0	Unchanged	Unchanged	Unchanged
2310022B05Rik	453.540978491957	-0.921863799576387	0.19326853534902	-4.76985970795304	1.84354267194792e-06	1.5174946291406e-05	37411	chr8	124662236	124664016	1781	*	6.86	6.76	6.95	0.19	0.55	0.851	138.12	79.39	100.8	147	Promoter (<=1kb)	8	124635756	124663369	27614	2	69551	uc009nxg.1	0	ENSMUSG00000031983	RIKEN cDNA 2310022B05 gene	uc009nxg.1	69551	0	Unchanged	FGF_down	Unchanged
2310030G06Rik	84.7399127207455	0.729627562679791	0.287490609861761	2.53791789245092	0.0111514143771959	0.0322325766955854	38216	chr9	50745652	50746832	1181	*	5.77	5.42	6.06	0.65	0.0824	0.333	46.96	38.44	65.61	68	Promoter (<=1kb)	9	50739691	50746521	6831	2	66952	uc009pki.1	0	ENSMUSG00000032062	RIKEN cDNA 2310030G06 gene	uc009pkl.3;uc009pki.1;uc009pkj.2;uc009pkk.2	12955;66952;69253;69253	0;0;0;0	Unchanged	FGF_up	Unchanged
2310033P09Rik	139.820145316542	-0.124239349117305	0.193386730882326	-0.642439884838341	0.520587609803131	0.656935160840682	5331	chr11	59207805	59209174	1370	*	7.04	7.1	6.98	-0.12	0.66	0.903	154.7	119.51	110.31	142	Promoter (<=1kb)	11	59208361	59210736	2376	1	67862	uc007jdl.2	0	ENSMUSG00000020441	RIKEN cDNA 2310033P09 gene	uc007jdm.2;uc007jdn.2;uc007jdo.2;uc007jdi.2;uc007jdj.2;uc007jdk.2;uc056ykx.1;uc056yky.1;uc007jdl.2	11840;11840;11840;67212;67212;67212;67212;67212;67862	0;0;0;0;0;0;0;0;0	Unchanged	Unchanged	Unchanged
2310034G01Rik	3.76539402181473	-0.340105117015451	1.03932293971926	-0.32723718876764	0.743488495309832	0.835559426040725	19717	chr19	46347691	46349922	2232	*	8.5	8.39	8.6	0.21	0.345	0.707	404.24	266.59	363.26	415	Promoter (<=1kb)	19	46348201	46348988	788	2	75579	uc029tsp.1	0	NA	RIKEN cDNA 2310034G01 gene	uc012bmy.1;uc029tsp.1	751550;75579	4929;0	Unchanged	Unchanged	Unchanged
2310039H08Rik	36.9107835984258	-0.398288397309113	0.360628478887788	-1.10442857573942	0.269407270658983	0.411062836779115	16716	chr17	46771690	46774522	2833	*	8.26	8.33	8.18	-0.15	0.486	0.813	360.04	284.98	273.87	308	Promoter (<=1kb)	17	46772635	46773407	773	1	67101	uc008cui.1	0	ENSMUSG00000062619	RIKEN cDNA 2310039H08 gene	uc008cuj.1;uc008cuk.1;uc008cui.1	66229;66229;67101	0;0;0	Unchanged	Unchanged	Unchanged
2310040G24Rik	13.4168986540174	-0.911433395533685	0.571417567604235	-1.59503915736267	0.110703479660651	0.208169916441802	31483	chr6	86486642	86488829	2188	*	7.14	7.41	6.82	-0.59	0.0383	0.205	207.18	132.04	123.62	102	Promoter (<=1kb)	6	86483376	86488227	4852	2	381792	uc009csa.1	0	ENSMUSG00000101655	RIKEN cDNA 2310040G24 gene	uc009csa.1;uc029vxg.1	381792;381792	0;0	Unchanged	Unchanged	Unchanged
2310061I04Rik	267.871298826959	-0.222363608978512	0.157196774816594	-1.41455579631293	0.157198777028986	0.273484684577938	16531	chr17	35896318	35898481	2164	*	7.73	7.69	7.77	0.08	0.748	0.933	254.15	159.62	210.16	227	Promoter (<=1kb)	17	35892677	35897111	4435	2	69662	uc008cix.1	0	ENSMUSG00000050705	RIKEN cDNA 2310061I04 gene	uc008ciw.3;uc012art.2;uc012aru.2;uc008cix.1;uc008ciy.1;uc012arv.1;uc012arw.3;uc008cja.4;uc008cjb.4;uc008cjc.4;uc008cjd.4;uc008cje.4;uc008cjf.1	69192;69192;69192;69662;69662;69662;73242;73242;73242;73242;73242;73242;73242	0;0;0;0;0;0;0;0;0;0;0;0;0	Unchanged	Unchanged	Unchanged
2310069B03Rik	6.87372609192331	-0.38799686073289	0.79256082694519	-0.489548369717398	0.624453518950144	0.743336988514742	31343	chr6	82881032	82883049	2018	*	7.98	7.75	8.18	0.43	0.0468	0.234	237.57	193.88	282.43	298	Promoter (<=1kb)	6	82877866	82881853	3988	2	69652	uc009clm.1	0	ENSMUSG00000100291	RIKEN cDNA 2310069B03 gene	uc009clm.1;uc029vwu.1	69652;69652	0;0	Unchanged	Unchanged	Unchanged
2410002F23Rik	1171.04257817885	0.21407976680166	0.117114586472854	1.82795135302195	0.0675568529344913	0.140156137176365	33436	chr7	44245724	44247759	2036	*	8.18	8.24	8.13	-0.11	0.643	0.893	366.49	238.18	251.05	308	Promoter (<=1kb)	7	44246722	44252319	5598	1	668661	uc009got.2	0	ENSMUSG00000045411	RIKEN cDNA 2410002F23 gene	uc012fjm.1;uc012fjl.1;uc009got.2;uc009gou.2;uc009gov.2;uc009gos.2;uc057bzv.1;uc009gox.2	100217433;100217434;668661;668661;668661;668661;668661;668661	-2391;-2096;0;0;0;0;0;0	Unchanged	Unchanged	Unchanged
2410015M20Rik	256.059816585622	-0.0528380923583574	0.164814635827513	-0.320591020894862	0.748520343022483	0.838848114374563	16872	chr17	56608429	56610570	2142	*	7.65	7.7	7.6	-0.11	0.64	0.892	221.92	194.72	189.24	198	Promoter (<=1kb)	17	56607452	56609771	2320	2	224904	uc008dcl.1	0	ENSMUSG00000049760	RIKEN cDNA 2410015M20 gene	uc012avv.1;uc008dck.2;uc008dcl.1;uc008dcm.1;uc008dcn.2;uc008dco.3;uc008dcp.3	224903;224903;224904;224904;54217;74142;74142	0;10659;0;0;0;0;0	Unchanged	Unchanged	Unchanged
2410131K14Rik	336.052325604255	0.310700692286493	0.163092559661828	1.9050574283139	0.0567726064510489	0.121952946136401	29125	chr5	118245323	118246433	1111	*	6.83	6.65	6.99	0.34	0.241	0.598	122.47	77.72	125.52	128	Promoter (<=1kb)	5	118245227	118263114	17888	1	76792	uc008zgj.1	96	ENSMUSG00000032840	RIKEN cDNA 2410131K14 gene	uc008zgh.2;uc012ecl.1;uc008zgj.1	269695;269695;76792	0;0;0	Unchanged	Unchanged	Unchanged
2500002B13Rik	5.22299690013078	-1.83174044810093	0.916591254103052	-1.99842671409015	0.0456704178403798	0.10227884080034	36002	chr8	57488009	57488614	606	*	6.16	6.37	5.93	-0.44	0.183	0.523	87.48	77.72	65.61	56	Promoter (<=1kb)	8	57487963	57510262	22300	1	78353	uc057all.1	46	ENSMUSG00000096917	RIKEN cDNA 2500002B13 gene	uc009lsu.2;uc057all.1	60406;78353	0;0	Unchanged	Unchanged	Unchanged
2500004C02Rik	20.0929835077063	-0.805832660741351	0.484368574497775	-1.66367659499151	0.0961770759683358	0.185944421218627	22488	chr2	153344772	153345555	784	*	6.22	5.92	6.47	0.55	0.0902	0.351	64.46	56.83	79.88	98	Promoter (<=1kb)	2	153341157	153345810	4654	2	72326	uc008nhr.2	255	ENSMUSG00000073236	RIKEN cDNA 2500004C02 gene	uc033hqy.1;uc008nhr.2	228790;72326	0;0	Unchanged	Unchanged	Unchanged
2510002D24Rik	107.54610041604	-0.124501505874558	0.207866085466176	-0.598950548355886	0.549205861830558	0.680782872910064	14606	chr16	18836182	18837334	1153	*	6.82	6.63	6.99	0.36	0.265	0.628	120.63	77.72	95.09	159	Promoter (<=1kb)	16	18836580	18840113	3534	1	72307	uc007yoo.1	0	ENSMUSG00000071632	RIKEN cDNA 2510002D24 gene	uc007yon.2;uc012acl.1;uc007yoo.1	22230;22230;72307	0;0;0	Unchanged	Unchanged	Unchanged
2510003B16Rik	4.49075213991542	0.13289012478278	0.908352297185874	0.146298000450355	0.88368614428537	0.928919683069371	26193	chr4	116123848	116124435	588	*	4.66	4.9	4.36	-0.54	0.319	0.684	31.31	28.41	16.17	25	Promoter (<=1kb)	4	116123840	116138841	15002	1	76786	uc008ugf.2	8	ENSMUSG00000028700	RIKEN cDNA 2510003B16 gene	uc008ugb.2;uc008ugd.2;uc008ugc.2;uc008uge.2;uc008ugf.2	19366;19366;19366;19366;76786	0;0;0;0;0	Unchanged	Unchanged	Unchanged
2510009E07Rik	169.230351270947	-1.14542542268386	0.194760008773099	-5.88121468005435	4.07266516547215e-09	5.6931571997337e-08	14665	chr16	21693684	21695136	1453	*	6.6	6.66	6.54	-0.12	0.673	0.908	110.5	91.93	83.68	102	Promoter (<=1kb)	16	21649045	21694665	45621	2	72190	uc007yrl.2	0	ENSMUSG00000043391	RIKEN cDNA 2510009E07 gene	uc007yrl.2	72190	0	Unchanged	FGF_down	Unchanged
2510039O18Rik	1896.30255594769	0.0642749739297883	0.130339805878206	0.493133877994641	0.62191799466594	0.741019227619112	27263	chr4	147940889	147941945	1057	*	5.95	5.73	6.14	0.41	0.275	0.639	65.38	40.95	61.81	79	Promoter (<=1kb)	4	147940895	147947314	6420	1	77034	uc008vtm.1	0	ENSMUSG00000044496	RIKEN cDNA 2510039O18 gene	uc008vtk.2;uc008vtl.2;uc008vtm.1;uc008vtn.1	18822;18822;77034;77034	0;0;0;0	Unchanged	Unchanged	Unchanged
2610005L07Rik	39.3144536676414	-0.164550371080775	0.321090737459742	-0.512473117046568	0.60831993013933	0.729837362479951	35578	chr8	20424132	20424853	722	*	7.36	7.24	7.47	0.24	0.356	0.717	179.56	122.01	172.12	183	Promoter (<=1kb)	8	20385782	20424814	39033	2	381598	uc009lba.2	0	ENSMUSG00000071793	cadherin 11 pseudogene	uc009lba.2;uc029wrd.1;uc012gan.2	381598;381598;381598	0;0;0	Unchanged	Unchanged	Unchanged
2610008E11Rik	19.2114800568065	-1.18759187441592	0.50261816763181	-2.36281127682174	0.0181369030112443	0.048301090258567	3397	chr10	79096904	79097610	707	*	5.71	5.81	5.61	-0.2	0.598	0.875	56.17	55.99	43.74	54	Promoter (<=1kb)	10	79064374	79097600	33227	2	72128	uc007fyo.2	0	ENSMUSG00000060301	RIKEN cDNA 2610008E11 gene	uc007fyo.2	72128	0	Unchanged	FGF_down	Unchanged
2610020C07Rik	72.5124577223352	-0.0346870745484059	0.270518461000611	-0.128224426606979	0.897971369989973	0.937422815452891	14429	chr16	11210981	11212429	1449	*	5.75	5.53	5.94	0.41	0.301	0.668	59.85	32.59	56.11	67	Intron (uc029swc.1/69918, intron 1 of 2)	16	11203383	11225796	22414	1	69918	uc029swc.1	7598	NA	RIKEN cDNA 2610020C07 gene	uc007yfd.3;uc007yfe.3;uc007yff.3;uc029swc.1	14852;14852;14852;69918	28411;0;0;0	Unchanged	Unchanged	Unchanged
2610035D17Rik	50.242406064791	3.74068474796607	0.445064345878328	8.40481782602442	4.28526263504731e-17	1.7722304157123e-15	7070	chr11	113201447	113201831	385	*	4.47	3.81	4.92	1.1	0.0532	0.253	14.73	13.37	31.38	29	Promoter (<=1kb)	11	113043906	113201838	157933	2	72386	uc007mei.2	7	ENSMUSG00000087259	RIKEN cDNA 2610035D17 gene	uc007mej.1;uc007mei.2;uc011ygz.1	319871;72386;72386	7838;0;0	Unchanged	FGF_up	Unchanged
2610044O15Rik8	19.4262985161128	-0.263664705263063	0.466818842319007	-0.564811617185932	0.572201904446666	0.700067270134769	37556	chr8	129233484	129235095	1612	*	6.73	6.66	6.8	0.14	0.644	0.894	125.23	76.89	95.09	128	Promoter (<=1kb)	8	129216354	129234046	17693	2	72139	uc029wwy.2	0	ENSMUSG00000071302	RIKEN cDNA 2610044O15 gene	uc029wwy.2	72139	0	Unchanged	Unchanged	Unchanged
2610203C22Rik	23.6628940329616	-0.59697395379318	0.443146657490341	-1.34712502893287	0.177939968386139	0.300259565459711	23	chr1	9628966	9632325	3360	*	8.61	8.81	8.38	-0.44	0.0341	0.191	508.29	391.95	318.56	347	Promoter (<=1kb)	1	9560832	9631092	70261	2	72481	uc007agn.3	0	ENSMUSG00000079671	RIKEN cDNA 2610203C22 gene	uc007agn.3;uc007ago.2;uc007agp.1	72481;72481;76982	0;0;0	Unchanged	Unchanged	Unchanged
2610301B20Rik	83.6528530562822	-0.239392586228987	0.235326180406447	-1.01727987007445	0.309020309901496	0.45541439506075	25135	chr4	10874090	10876074	1985	*	7.81	7.79	7.82	0.03	0.896	0.974	261.51	182.18	213.96	239	Promoter (<=1kb)	4	10874498	10899425	24928	1	67157	uc012dam.2	0	ENSMUSG00000059482	RIKEN cDNA 2610301B20 gene	uc012dam.2	67157	0	Unchanged	Unchanged	Unchanged
2610507B11Rik	8782.76777017966	0.0293966827305403	0.120567884092829	0.243818517275354	0.807371378344942	0.879805134389018	5981	chr11	78261751	78262614	864	*	6.7	6.6	6.8	0.2	0.506	0.826	115.1	79.39	100.8	122	Promoter (<=1kb)	11	78261754	78290625	28872	1	72503	uc007kir.2	0	ENSMUSG00000010277	RIKEN cDNA 2610507B11 gene	uc007kir.2	72503	0	Unchanged	Unchanged	Unchanged
2610524H06Rik	179.787777382658	-0.111329721531149	0.216500081084262	-0.514224849125205	0.607094796389413	0.72866007295102	28992	chr5	114822918	114823466	549	*	5.34	5.34	5.34	0	0.996	0.999	45.12	35.94	42.79	38	Promoter (<=1kb)	5	114821937	114823468	1532	2	330173	uc008zau.1	2	ENSMUSG00000092486	RIKEN cDNA 2610524H06 gene	uc008zau.1	330173	0	Unchanged	Unchanged	Unchanged
2700038G22Rik	62.5792102793465	0.759248264803298	0.282843921768675	2.68433650635156	0.00726739182827077	0.0224096664425934	27785	chr5	23850092	23852090	1999	*	7.96	7.97	7.95	-0.01	0.958	0.991	276.25	223.97	232.98	263	Promoter (<=1kb)	5	23850597	23855033	4437	1	67194	uc008wqt.2	0	ENSMUSG00000097180	RIKEN cDNA 2700038G22 gene	uc012dsy.3;uc008wqt.2;uc029vgl.1	100217436;67194;67194	-143;0;0	Unchanged	FGF_up	Unchanged
2700062C07Rik	103.085415545073	-0.0280900360355628	0.231671998975976	-0.12124916329865	0.903493684650309	0.941063203020111	17612	chr18	24470300	24471583	1284	*	6.87	6.78	6.96	0.18	0.528	0.839	133.52	86.08	122.67	126	Promoter (<=1kb)	18	24470871	24477767	6897	1	68046	uc008egt.1	0	ENSMUSG00000024273	RIKEN cDNA 2700062C07 gene	uc008egt.1;uc012bai.1	68046;68046	0;0	Unchanged	Unchanged	Unchanged
2700069I18Rik	5.11484344596022	-0.334975073359982	0.868413392721396	-0.385732274706464	0.69969495744323	0.802301937045011	23206	chr3	5217512	5224427	6916	*	9.45	9.6	9.28	-0.31	0.0907	0.352	860.05	686.95	640.93	604	Promoter (<=1kb)	3	5177824	5220823	43000	2	72608	uc008onz.2	0	NA	RIKEN cDNA 2700069I18 gene	uc008onz.2;uc008ooa.1	72608;80892	0;0	Unchanged	Unchanged	Unchanged
2700070H01Rik	5.79759419381109	-0.489373718256643	0.835151076406707	-0.585970289785419	0.55789548043182	0.688626126419613	11821	chr14	63053903	63054745	843	*	5.54	5.63	5.44	-0.19	0.647	0.896	59.85	39.28	42.79	44	Intron (uc007uhg.1/72609, intron 2 of 3)	14	63046991	63058149	11159	1	72609	uc007uhg.1	6912	NA	RIKEN cDNA 2700070H01 gene	uc007uhg.1;uc029sks.1;uc007uhe.1	72609;72609;73670	0;-328;-3943	Unchanged	Unchanged	Unchanged
2810001G20Rik	37.2132675978299	0.783289675147444	0.379498947805473	2.06401013672625	0.0390167552963214	0.0901291571901108	5513	chr11	64078850	64080377	1528	*	7.58	7.43	7.71	0.28	0.224	0.58	185.09	160.46	201.6	217	Promoter (<=1kb)	11	64079484	64083259	3776	1	66456	uc007jkq.2	0	ENSMUSG00000087497	RIKEN cDNA 2810001G20 gene	uc007jkq.2;uc007jko.2;uc007jkp.2	66456;70383;70383	0;0;0	Unchanged	Unchanged	Unchanged
2810002D19Rik	22.3906543381419	0.306497102497949	0.440179515675714	0.696300240204158	0.486240822787742	0.626109708463596	21462	chr2	94405729	94407554	1826	*	7.76	7.69	7.83	0.14	0.535	0.843	235.73	177.17	239.64	216	Promoter (<=1kb)	2	94406707	94411682	4976	1	66457	uc008lgw.3	0	NA	RIKEN cDNA 2810002D19 gene	uc008lgx.2;uc008lgy.2;uc008lgw.3;uc008lgu.1	11800;11800;66457;74569	0;0;0;0	Unchanged	Unchanged	Unchanged
2810006K23Rik	82.5102851258151	-0.733917781609998	0.240023611219381	-3.05768994092501	0.002230502335342	0.00816757472794349	29398	chr5	124328113	124329164	1052	*	7.3	7.25	7.35	0.1	0.686	0.913	166.67	137.89	158.81	167	Promoter (<=1kb)	5	124328089	124340121	12033	1	72650	uc008zpm.1	24	ENSMUSG00000047635	RIKEN cDNA 2810006K23 gene	uc008zpg.2;uc008zph.2;uc033imc.1;uc008zpi.2;uc008zpj.2;uc008zpl.2;uc008zpm.1;uc008zpn.2	269702;269702;269702;269702;269702;269702;72650;72650	0;0;0;0;0;0;0;0	Unchanged	FGF_down	Unchanged
2810013P06Rik	13.9193111710209	0.0991811417024473	0.592897587529896	0.167282080056442	0.867148103504001	0.918220983807807	37349	chr8	123042513	123043920	1408	*	7.94	7.88	7.99	0.11	0.642	0.893	274.4	197.23	237.73	270	Promoter (<=1kb)	8	123042575	123044602	2028	1	100503178	uc029wwr.1	0	ENSMUSG00000099881	RIKEN cDNA 2810013P06 gene	uc029wwr.1;uc009ntz.2;uc012gml.1;uc009nub.2	100503178;77087;77087;77087	0;0;0;0	Unchanged	Unchanged	Unchanged
2810021J22Rik	57.0078955784943	0.0866996609590941	0.292168707395121	0.296745198115429	0.766661047287514	0.8523051657688	5316	chr11	58866947	58867755	809	*	5.44	5.4	5.47	0.07	0.855	0.964	45.12	39.28	40.89	48	Promoter (<=1kb)	11	58867240	58884338	17099	1	69944	uc007jcm.1	0	ENSMUSG00000020491	RIKEN cDNA 2810021J22 gene	uc007jcm.1	69944	0	Unchanged	Unchanged	Unchanged
2810025M15Rik	228.430355759521	0.338069251402958	0.162935651132158	2.0748635983217	0.0379991782520663	0.0882218683894127	1603	chr1	157416787	157418384	1598	*	6.15	5.69	6.49	0.8	0.0166	0.117	53.41	50.14	83.68	96	Intron (uc007ddi.1/69953, intron 2 of 2)	1	157412352	157420236	7885	1	69953	uc007ddi.1	4435	ENSMUSG00000049881	RIKEN cDNA 2810025M15 gene	uc007ddg.2;uc007ddh.2;uc007ddi.1	226525;226525;69953	0;0;0	Unchanged	Unchanged	Unchanged
2810029C07Rik	13.5038269429037	0.518263132288343	0.55294060872429	0.937285350562418	0.348611796404479	0.49409953303007	9081	chr12	111573103	111574344	1242	*	6.15	5.26	6.69	1.43	2.36e-05	0.00079	41.44	35.1	104.6	102	Promoter (<=1kb)	12	111572317	111574402	2086	2	100504687	uc029ryf.1	58	ENSMUSG00000096995	RIKEN cDNA 2810029C07 gene	uc029ryf.1;uc007pdj.1;uc007pdk.2;uc007pdl.2	100504687;100504687;17169;17169	0;0;-166;-166	FGF_up	Unchanged	Unchanged
2810403D21Rik	6.60352063797945	-0.12685970372395	0.807736045015937	-0.157055890357657	0.875200800467977	0.9240970607865	40478	chrX	108834636	108835388	753	*	5.44	5.4	5.47	0.07	0.864	0.966	55.25	29.25	43.74	45	Promoter (<=1kb)	20	108834657	108874974	40318	1	69964	uc009ucp.2	0	ENSMUSG00000086629	RIKEN cDNA 2810403D21 gene	uc009ucm.1;uc009ucn.1;uc009uco.1;uc057mcc.1;uc009ucp.2;uc057mcd.1;uc009ucq.1	382236;382236;69964;69964;69964;69964;69964	0;0;0;0;0;0;0	Unchanged	Unchanged	Unchanged
2810408I11Rik	30.3122073725093	0.691257644528335	0.437704233222632	1.57928023551177	0.114271793201052	0.213435923165958	485	chr1	64689662	64690649	988	*	6.08	6.09	6.07	-0.02	0.966	0.993	93	43.46	68.47	66	Promoter (<=1kb)	1	64679869	64690659	10791	2	69941	uc007bgw.2	10	ENSMUSG00000087213	RIKEN cDNA 2810408I11 gene	uc007bgx.2;uc007bgw.2	227210;69941	0;0	Unchanged	Unchanged	Unchanged
2810410L24Rik	18.921649048171	-1.75489196954574	0.499780001969779	-3.51132890997879	0.000445872364124204	0.0020308942439072	7436	chr11	120184233	120190021	5789	*	8.85	9.07	8.59	-0.48	0.0308	0.178	639.97	437.07	348.99	424	Promoter (<=1kb)	11	120186650	120189856	3207	2	100042332	uc007msb.2	0	NA	RIKEN cDNA 2810410L24 gene	uc007msb.2	100042332	0	Unchanged	FGF_down	Unchanged
2810429I04Rik	41.996936744666	-0.354701285605074	0.312486813588188	-1.13509201086647	0.256336768588874	0.395422955365801	9201	chr13	3477534	3479174	1641	*	6.38	6.3	6.45	0.15	0.636	0.89	97.61	60.17	90.34	85	Promoter (<=1kb)	13	3478260	3485220	6961	1	76937	uc007pit.1	0	ENSMUSG00000097709	RIKEN cDNA 2810429I04 gene	uc007pit.1;uc007pip.2;uc007piq.2;uc007pis.2	76937;76937;76937;76937	0;0;0;0	Unchanged	Unchanged	Unchanged
2900076A07Rik	20.5356024934553	-0.470093799994165	0.438157253534303	-1.07288832080778	0.283321226826303	0.426641716395108	34033	chr7	81522800	81524354	1555	*	7.01	6.96	7.05	0.09	0.722	0.926	134.44	115.33	136.94	129	Promoter (<=1kb)	7	81523550	81531498	7949	1	100504421	uc057luk.1	0	ENSMUSG00000097277	RIKEN cDNA 2900076A07 gene	uc057luk.1;uc057lul.1;uc057lum.1	100504421;100504421;100504421	0;0;0	Unchanged	Unchanged	Unchanged
2900097C17Rik	607.044268466545	0.554708946278041	0.159451036062347	3.47886699250512	0.000503538441712267	0.00226171610505388	22643	chr2	156392708	156393952	1245	*	6.6	6.37	6.8	0.43	0.155	0.481	97.61	67.69	121.72	101	Promoter (<=1kb)	2	156388063	156392979	4917	2	347740	uc012chs.3	0	ENSMUSG00000102869	RIKEN cDNA 2900097C17 gene	uc012chs.3	347740	0	Unchanged	FGF_up	Unchanged
3110009E18Rik	11.7064138822999	-0.3580855323385	0.571919461892264	-0.626111815033766	0.531241603123843	0.664788989690732	1093	chr1	120121200	120122653	1454	*	7.61	7.65	7.57	-0.08	0.733	0.929	220.08	181.35	202.55	177	Promoter (<=1kb)	1	120121187	120188189	67003	1	73103	uc007cjg.1	13	ENSMUSG00000026388	RIKEN cDNA 3110009E18 gene	uc007cje.1;uc007cjf.2;uc007cjg.1;uc007cjh.2	13167;13167;73103;73103	0;0;0;0	Unchanged	Unchanged	Unchanged
3110021A11Rik	3.07495256834511	2.0333787150443	1.3020097195333	1.56172314579431	0.118353223713233	0.219379300530485	32006	chr6	119849326	119849911	586	*	4.2	3.7	4.57	0.87	0.185	0.526	18.42	7.52	29.48	18	Promoter (1-2kb)	6	119848193	119849029	837	1	67289	uc012erq.2	1133	NA	RIKEN cDNA 3110021A11 gene	uc009dmk.1;uc009dml.1;uc009dmm.1;uc009dmn.1;uc012erq.2	111173;111173;111173;111173;67289	0;0;0;0;0	Unchanged	Unchanged	Unchanged
3110039I08Rik	510.873168996418	1.15647655158002	0.240066049622976	4.81732653741029	1.45494479619325e-06	1.22980906676816e-05	37998	chr9	41474839	41476755	1917	*	7.98	7.91	8.05	0.13	0.528	0.839	238.49	244.03	285.28	244	Promoter (<=1kb)	9	41474893	41592829	117937	1	73144	uc057cdj.1	0	ENSMUSG00000074415	RIKEN cDNA 3110039I08 gene	uc057cdh.1;uc057cdi.1;uc057cdj.1;uc009paj.3	73144;73144;73144;73144	0;0;0;0	Unchanged	FGF_up	Unchanged
3110040N11Rik	91.8132086510126	-0.292183530596987	0.247273100429669	-1.18162278909141	0.237355406957441	0.373370863905678	34036	chr7	81788159	81790201	2043	*	7.7	7.58	7.81	0.23	0.333	0.698	221.92	160.46	217.76	230	Promoter (<=1kb)	7	81782187	81789453	7267	2	67290	uc009icm.1	0	ENSMUSG00000025102	RIKEN cDNA 3110040N11 gene	uc009icm.1;uc009icn.1	67290;83962	0;0	Unchanged	Unchanged	Unchanged
3110056K07Rik	22.0260772169035	0.352554398430422	0.427774701694918	0.824159065586488	0.409849182596157	0.556621407841978	8240	chr12	71013475	71015663	2189	*	7.59	7.54	7.63	0.09	0.692	0.915	216.39	155.44	197.8	199	Promoter (<=1kb)	12	70991615	71015823	24209	2	73204	uc007nub.2	160	ENSMUSG00000085622	RIKEN cDNA 3110056K07 gene	uc011ynm.1;uc007nud.1;uc007nue.1;uc007nub.2;uc007nuc.3	238247;238247;238247;73204;73204	0;0;0;0;0	Unchanged	Unchanged	Unchanged
3110082I17Rik	209.854259481204	-0.270110838048229	0.189535846332342	-1.42511742910417	0.154123259305246	0.269586008373526	29942	chr5	139460023	139461055	1033	*	5.97	5.49	6.33	0.84	0.0169	0.119	44.2	45.96	75.12	86	Promoter (<=1kb)	5	139359739	139460534	100796	2	73212	uc009agk.1	0	ENSMUSG00000053553	RIKEN cDNA 3110082I17 gene	uc009agk.1;uc009agl.1	73212;73212	0;0	Unchanged	Unchanged	Unchanged
3300002I08Rik	4.0066334985029	-0.573766499161077	1.00113898475914	-0.573113731355809	0.566567690491588	0.695809395474256	22355	chr2	150362347	150362732	386	*	4.72	4.87	4.55	-0.33	0.527	0.839	28.55	30.09	24.72	22	Promoter (<=1kb)	2	150310937	150362765	51829	2	69277	uc008mtz.1	33	ENSMUSG00000063364	RIKEN cDNA 3300002I08 gene	uc008mtz.1;uc012cfu.1	69277;69277	0;0	Unchanged	Unchanged	Unchanged
3300002P13Rik	10.8552205036604	-1.37146663259804	0.658450794294394	-2.08286882555549	0.0372631818982586	0.0869013756191193	32648	chr7	3420397	3424575	4179	*	8.48	8.68	8.26	-0.41	0.0821	0.332	466.86	351	245.34	369	Promoter (<=1kb)	7	3421665	3423445	1781	2	70230	uc009eux.3	0	ENSMUSG00000107585	RIKEN cDNA 3300002P13 gene	uc009euy.2;uc009eux.3;uc029wda.3	54378;70230;81905	-87;0;26355	Unchanged	Unchanged	Unchanged
3300005D01Rik	158.963023564491	1.5737013791951	0.272372088439539	5.77776301606773	7.57003292595667e-09	1.02233936193259e-07	15651	chr17	5799488	5800156	669	*	6.66	6.47	6.83	0.36	0.196	0.542	92.08	85.24	116.01	112	Promoter (<=1kb)	17	5799490	5803242	3753	1	78512	uc008afh.2	0	ENSMUSG00000096965	RIKEN cDNA 3300005D01 gene	uc029szi.1;uc057kwc.1;uc008afh.2;uc008afi.2	78512;78512;78512;78512	0;0;0;0	Unchanged	FGF_up	Unchanged
3830403N18Rik	163.277444578089	0.500649487224767	0.28237424951016	1.77299979758513	0.076228740411929	0.154444034773618	40152	chrX	56136547	56137259	713	*	5.17	5.32	5.01	-0.31	0.495	0.82	40.52	39.28	28.53	36	Promoter (<=1kb)	20	56136572	56153496	16925	1	70691	uc009tfy.1	0	ENSMUSG00000031125	RIKEN cDNA 3830403N18 gene	uc009tfy.1	70691	0	Unchanged	Unchanged	Unchanged
3830406C13Rik	28.7494608379704	-0.733839412450792	0.403476685816658	-1.81879012653597	0.0689434553020039	0.142537999960137	10948	chr14	12283960	12285186	1227	*	6.68	6.74	6.62	-0.12	0.679	0.91	126.15	87.75	93.19	103	Promoter (<=1kb)	14	12284203	12303231	19029	1	218734	uc007sfo.2	0	ENSMUSG00000033111	RIKEN cDNA 3830406C13 gene	uc007sfo.2;uc007sfp.2;uc007sfq.2;uc007sfr.2;uc033gnu.1;uc033gnv.1;uc033gnw.1	218734;218734;218734;218734;218734;218734;218734	0;0;0;0;0;0;0	Unchanged	Unchanged	Unchanged
3830408C21Rik	11.8346753111257	0.106439479414617	0.56618465583315	0.187994284758546	0.850881131407353	0.906635578370391	10767	chr13	107021012	107023634	2623	*	8.39	8.4	8.38	-0.02	0.932	0.983	384.9	290.83	312.86	354	Promoter (<=1kb)	13	107022570	107033518	10949	1	100040322	uc007rug.2	0	ENSMUSG00000071181	RIKEN cDNA 3830408C21 gene	uc007rug.2;uc011zej.1;uc007ruc.2;uc007rud.2;uc007rue.1	100040322;100040322;16563;16563;16563	0;0;0;0;0	Unchanged	Unchanged	Unchanged
3930402G23Rik	5.53993894585653	-1.94965585383262	0.890249630397414	-2.19001029291333	0.0285234903492035	0.0700313797563024	35448	chr8	10925634	10926688	1055	*	4.32	4.97	3.13	-1.83	0.00377	0.0405	34.07	28.41	8.56	9	Promoter (1-2kb)	8	10924427	10928457	4031	2	665306	uc009kuy.1	1769	ENSMUSG00000038917	RIKEN cDNA 3930402G23 gene	uc009kuy.1;uc057cbp.1	665306;665306	0;0	FGF_down	Unchanged	Unchanged
4430402I18Rik	22.4233765283756	-0.690968474790268	0.429924797472465	-1.60718450959908	0.108013899061922	0.204237007053962	19318	chr19	28963082	28964712	1631	*	6.79	6.93	6.63	-0.3	0.332	0.697	151.94	91.93	92.24	106	Promoter (<=1kb)	19	28923064	28964154	41091	2	381218	uc008hcq.1	0	ENSMUSG00000064202	RIKEN cDNA 4430402I18 gene	uc008hcp.1;uc008hcq.1;uc012bke.1;uc012bkf.1;uc008hcr.2	381218;381218;381218;381218;74411	0;0;0;0;0	Unchanged	Unchanged	Unchanged
4632404H12Rik	36.2932430166913	-0.106278577846719	0.363238447057263	-0.292586257615963	0.769838419153497	0.854248332162529	24010	chr3	89772142	89772548	407	*	4.16	3.83	4.42	0.59	0.35	0.712	18.42	10.03	21.87	21	Promoter (<=1kb)	3	89767511	89773400	5890	2	74034	uc008qab.2	852	ENSMUSG00000042579	RIKEN cDNA 4632404H12 gene	uc008qad.2;uc008qab.2	70093;74034	0;0	Unchanged	Unchanged	Unchanged
4632415L05Rik	71.4130085189399	-0.587320070430334	0.267016371261382	-2.19956577065234	0.0278377179649514	0.0686296215175535	23259	chr3	19894834	19895814	981	*	5.62	5.77	5.45	-0.32	0.422	0.77	62.62	46.8	44.69	43	Promoter (<=1kb)	3	19894871	19898984	4114	1	70808	uc012cnt.1	0	ENSMUSG00000048106	RRS1 ribosome biogenesis regulator homolog pseudogene	uc012cnt.1	70808	0	Unchanged	Unchanged	Unchanged
4632427E13Rik	5.27665486337111	0.413393261763581	0.852746550525221	0.484778579882809	0.627833418678483	0.746188307750864	34158	chr7	92740473	92741503	1031	*	7.41	7.43	7.39	-0.05	0.845	0.961	188.77	157.11	161.66	173	Promoter (<=1kb)	7	92740706	92741459	754	2	666737	uc012fpc.1	0	ENSMUSG00000074024	RIKEN cDNA 4632427E13 gene	uc012fpc.1;uc009iif.1	666737;75985	0;0	Unchanged	Unchanged	Unchanged
4732416N19Rik	3.59319849462921	-1.30297234082657	1.08904364315827	-1.19643721260601	0.231525986854215	0.366273804749382	32592	chr6	148212232	148212832	601	*	6.98	6.89	7.07	0.18	0.484	0.813	113.26	123.68	140.74	128	Promoter (<=1kb)	6	148212288	148235663	23376	1	320737	uc009eth.1	0	NA	RIKEN cDNA 4732416N19 gene	uc009eth.1;uc009etd.1;uc009ete.1;uc009etf.1	320737;67456;67456;67456	0;0;0;0	Unchanged	Unchanged	Unchanged
4732471J01Rik	26.0081572783201	0.287124032930845	0.408137026913528	0.703499104460518	0.481744764658809	0.622113932750133	33022	chr7	25375596	25378369	2774	*	7.88	7.65	8.07	0.43	0.0448	0.227	200.74	199.73	285.28	254	Promoter (<=1kb)	7	25376819	25385734	8916	1	654804	uc009fsn.1	0	ENSMUSG00000053714	RIKEN cDNA 4732471J01 gene	uc009fsp.1;uc009fsq.2;uc009fsr.1;uc009fss.1;uc009fsn.1;uc009fso.1	16890;16890;16890;16890;654804;654804	0;0;0;0;0;0	Unchanged	Unchanged	Unchanged
4732491K20Rik	10.7430354343219	0.217550366794914	0.598328113577466	0.36359709974876	0.716158892826127	0.815504105093166	15766	chr17	12317684	12319725	2042	*	7.66	7.55	7.77	0.22	0.336	0.701	213.63	160.46	217.76	219	Promoter (<=1kb)	17	12318853	12327250	8398	1	224523	uc008akr.2	0	ENSMUSG00000097350	RIKEN cDNA 4732491K20 gene	uc008akr.2;uc008akn.1;uc008ako.1;uc008akp.1;uc008akq.1	224523;26407;26407;26407;26407	0;0;0;0;0	Unchanged	Unchanged	Unchanged
4833417C18Rik	5.67043215062073	-0.269051184946743	0.831848511989204	-0.323437718609797	0.746363767961167	0.837609366635856	6457	chr11	95858872	95860557	1686	*	8.13	8.16	8.09	-0.07	0.764	0.938	327.81	244.86	282.43	264	Promoter (<=1kb)	11	95858817	95861046	2230	1	73906	uc029rnr.1	55	ENSMUSG00000086015	RIKEN cDNA 4833417C18 gene	uc007lax.1;uc011ydc.1;uc029rnr.1	14422;14422;73906	54314;54314;0	Unchanged	Unchanged	Unchanged
4833420G17Rik	149.512672458094	-0.324528703269119	0.207029398169064	-1.56754888986396	0.116986447976026	0.217486704963363	10901	chr13	119461836	119463499	1664	*	7.07	7.05	7.1	0.04	0.866	0.966	141.81	123.68	125.52	148	Promoter (<=1kb)	13	119462759	119470161	7403	1	67392	uc007rzf.2	0	ENSMUSG00000062822	RIKEN cDNA 4833420G17 gene	uc007rzc.2;uc007rzd.2;uc007rzf.2;uc007rzg.2;uc007rzh.2;uc007rzi.2;uc007rzj.2;uc011zex.1	218693;218693;67392;67392;67392;67392;67392;67392	0;0;0;0;0;0;0;0	Unchanged	Unchanged	Unchanged
4833427F10Rik	21.9465441830538	3.88102456748262	0.710588289571133	5.46170634169185	4.7157969574013e-08	5.42998123649907e-07	16515	chr17	35770740	35772802	2063	*	7.04	6.29	7.53	1.24	3.08e-06	0.000149	88.4	67.69	177.83	192	Promoter (<=1kb)	17	35772450	35780687	8238	1	74601	uc029thk.1	0	ENSMUSG00000092171	RIKEN cDNA 4833427F10 gene	uc029thk.1	74601	0	FGF_up	FGF_up	FGF_up
4833427G06Rik	3.0119794658826	0.0424691678933299	1.08554984580146	0.039122264221755	0.968792910273433	0.983029529172456	38238	chr9	51097244	51097541	298	*	3.66	3.83	3.48	-0.34	0.651	0.898	17.5	10.86	12.36	10	Intron (uc009plc.1/235345, intron 3 of 5)	9	51081313	51102078	20766	2	235345	uc009plc.1	4537	ENSMUSG00000032057	RIKEN cDNA 4833427G06 gene	uc009plc.1	235345	0	Unchanged	Unchanged	Unchanged
4833439L19Rik	690.699890648369	0.159935991892002	0.131661352479884	1.21475276441838	0.224460401453713	0.358082049943244	10056	chr13	54564593	54565928	1336	*	6.88	6.76	6.98	0.22	0.415	0.766	121.55	95.27	118.87	134	Promoter (<=1kb)	13	54551192	54565382	14191	2	97820	uc007qog.2	0	ENSMUSG00000025871	RIKEN cDNA 4833439L19 gene	uc007qog.2;uc007qof.3;uc007qoi.3;uc029sbj.1;uc029sbk.1;uc029sbl.1	97820;97820;97820;97820;97820;97820	0;0;0;0;0;0	Unchanged	Unchanged	Unchanged
4921524J17Rik	129.380197130509	-0.313547784847704	0.233162639370497	-1.34475997395738	0.17870275991932	0.301164042097534	36546	chr8	85431020	85432854	1835	*	8.27	8.51	7.99	-0.52	0.0143	0.105	407	320.08	255.8	252	Promoter (<=1kb)	8	85408759	85432841	24083	2	66714	uc009mpv.2	0	ENSMUSG00000036934	RIKEN cDNA 4921524J17 gene	uc009mpv.2;uc009mpw.2	66714;66714	0;0	Unchanged	Unchanged	Unchanged
4921531C22Rik	6.2097737658128	0.83911413701388	0.889063681233731	0.943817810496389	0.345262757570389	0.490850538656035	23138	chr2	179980093	179980485	393	*	4.28	3.99	4.52	0.52	0.386	0.743	19.34	12.54	23.77	22	Distal Intergenic	2	179976853	179979013	2161	1	66730	uc008ohx.1	3240	ENSMUSG00000085704	RIKEN cDNA 4921531C22 gene	uc008ohw.1;uc008ohx.1	228980;66730	0;0	Unchanged	Unchanged	Unchanged
4930402H24Rik	240.808692106165	-0.0518473409651015	0.158176097790534	-0.32778240005491	0.743076195529808	0.835253144829518	22090	chr2	130838665	130840949	2285	*	7.8	7.43	8.09	0.66	0.00812	0.0709	211.79	133.71	267.21	277	Promoter (<=1kb)	2	130706200	130839687	133488	2	228602	uc008mjw.2	0	ENSMUSG00000027309	RIKEN cDNA 4930402H24 gene	uc008mjw.2;uc008mjx.2;uc008mjy.2;uc008mjz.2;uc008mka.2	228602;228602;228602;228602;228602	0;0;0;0;0	Unchanged	Unchanged	Unchanged
4930412C18Rik	6.87101748022594	-1.38501913357194	0.788756686993746	-1.7559523188967	0.079096550413714	0.159259092072896	25133	chr4	9769326	9771235	1910	*	7.49	7.73	7.21	-0.52	0.0236	0.149	221	203.08	150.25	145	Promoter (<=1kb)	4	9770585	9823411	52827	1	320152	uc008ryq.1	0	NA	RIKEN cDNA 4930412C18 gene	uc008ryq.1;uc008rys.1	320152;320152	0;0	Unchanged	Unchanged	Unchanged
4930430F08Rik	19.1288493312853	-0.0988293636945824	0.462646816958723	-0.213617299572602	0.830845507677549	0.894376790755838	3954	chr10	100588825	100589174	350	*	3.7	3.28	4.01	0.73	0.325	0.69	11.97	7.52	13.31	19	Promoter (<=1kb)	10	100572274	100589259	16986	2	68281	uc007gxx.2	85	ENSMUSG00000046567	RIKEN cDNA 4930430F08 gene	uc007gxz.1;uc007gxx.2;uc007gxy.2	66605;68281;68281	-3212;0;0	Unchanged	Unchanged	Unchanged
4930451G09Rik	6.26057853943964	-0.15392270758173	0.888979039795987	-0.173145485654031	0.862537072462662	0.915404511483752	14359	chr16	4964435	4965493	1059	*	5.99	5.94	6.05	0.11	0.74	0.931	67.22	55.16	70.37	62	Promoter (<=1kb)	16	4964289	4978962	14674	1	74684	uc007ybf.3	146	ENSMUSG00000022543	RIKEN cDNA 4930451G09 gene	uc007ybc.2;uc007ybd.2;uc007ybe.2;uc007ybf.3	72615;72615;72615;74684	0;0;0;0	Unchanged	Unchanged	Unchanged
4930453N24Rik	169.556273480334	0.382267468033086	0.203409364986633	1.8793012212501	0.06020337504892	0.127988391779561	15311	chr16	64770157	64771638	1482	*	7.32	7.42	7.22	-0.2	0.421	0.77	186.93	154.61	139.79	158	Promoter (<=1kb)	16	64766104	64770939	4836	2	67609	uc007zqb.1	0	ENSMUSG00000059920	RIKEN cDNA 4930453N24 gene	uc007zqb.1;uc007zqc.1	67609;67609	0;0	Unchanged	Unchanged	Unchanged
4930461G14Rik	3.24240212913084	0.245102163352872	1.09252393395761	0.224344891434096	0.822488947978229	0.890012628476349	38415	chr9	58453486	58454616	1131	*	5.35	5.32	5.39	0.07	0.87	0.967	40.52	39.28	45.65	38	Promoter (<=1kb)	9	58455173	58469623	14451	1	74879	uc009pwy.1	-557	ENSMUSG00000097651	RIKEN cDNA 4930461G14 gene	uc009pwy.1	74879	0	Unchanged	Unchanged	Unchanged
4930465K10Rik	2.49658795226455	1.08543425311711	1.20657085542144	0.899602578862209	0.368331784321795	0.514416109972316	18505	chr18	77714689	77715206	518	*	4.82	4.96	4.67	-0.29	0.569	0.862	23.02	39.28	21.87	29	Promoter (<=1kb)	18	77714184	77715445	1262	1	67640	uc008frr.2	505	NA	RIKEN cDNA 4930465K10 gene	uc008frn.1;uc008fro.1;uc008frq.1;uc008frr.2	212163;212163;212163;67640	0;0;0;0	Unchanged	Unchanged	Unchanged
4930473A02Rik	55.3502306873741	-0.620232757125903	0.298081410879332	-2.0807495351563	0.0374568374614914	0.0871840473108954	22072	chr2	130563132	130563615	484	*	4.2	4.29	4.09	-0.2	0.74	0.931	17.5	21.73	18.07	16	Promoter (<=1kb)	2	130543791	130563749	19959	2	321014	uc008mje.1	134	ENSMUSG00000060029	RIKEN cDNA 4930473A02 gene	uc008mje.1;uc008mjf.1	321014;99045	0;0	Unchanged	Unchanged	Unchanged
4930479D17Rik	8.17547651461318	0.0166239179998001	0.786691940004817	0.021131420260513	0.983140820743306	0.99145412575825	32526	chr6	146655044	146657000	1957	*	10.74	10.53	10.93	0.4	0.0164	0.116	1541.46	1417.36	2120.59	1783	Promoter (<=1kb)	6	146657218	146665403	8186	1	74925	uc029wct.1	-218	ENSMUSG00000085238	RIKEN cDNA 4930479D17 gene	uc009esg.1;uc029wct.1	108098;74925	0;0	Unchanged	Unchanged	Unchanged
4930481A15Rik	3.03495187446267	0.812365813820052	1.22792427669295	0.66157647441251	0.508242688732045	0.646592610987583	18766	chr19	5408096	5410061	1966	*	7.13	6.95	7.29	0.34	0.199	0.546	134.44	113.66	180.68	133	Promoter (1-2kb)	19	5406815	5422847	16033	1	74931	uc008gcx.3	1281	ENSMUSG00000086938	RIKEN cDNA 4930481A15 gene	uc008gcx.3;uc012bgw.2	74931;74931	0;0	Unchanged	Unchanged	Unchanged
4930486L24Rik	1534.65347367394	-0.190187805969074	0.462345567712878	-0.411354232095034	0.68081280858831	0.789317556334026	10170	chr13	60863337	60864415	1079	*	5.78	5.67	5.89	0.22	0.604	0.877	41.44	60.17	82.73	36	Promoter (<=1kb)	13	60842612	60864416	21805	2	214639	uc007qvs.1	1	ENSMUSG00000050345	RIKEN cDNA 4930486L24 gene	uc007qvs.1	214639	0	Unchanged	Unchanged	Unchanged
4930503B20Rik	16.408987060671	0.241281321507407	0.499292316332838	0.483246614487382	0.628920640830111	0.747054213794622	24994	chr3	146652269	146653283	1015	*	5.34	5	5.61	0.61	0.186	0.528	43.28	20.89	43.74	54	Promoter (<=1kb)	3	146646259	146651317	5059	2	75015	uc008rrr.1	-952	ENSMUSG00000048652	RIKEN cDNA 4930503B20 gene	uc029upa.1;uc008rrq.1;uc008rrr.1	100286843;75015;75015	0;-3963;0	Unchanged	Unchanged	Unchanged
4930506C21Rik	12.0632701650199	0.0169107969511221	0.598307535836766	0.0282643890277454	0.977451282684542	0.987865527705533	15715	chr17	8310551	8310879	329	*	3.91	4.07	3.72	-0.35	0.611	0.88	20.26	13.37	12.36	14	Promoter (<=1kb)	17	8293366	8311118	17753	2	75060	uc008ajk.2	239	ENSMUSG00000087478	RIKEN cDNA 4930506C21 gene	uc008ajm.1;uc008ajn.1;uc008ajk.2	106489;106489;75060	0;0;0	Unchanged	Unchanged	Unchanged
4930511M06Rik	30.8088673393057	-1.95735870720272	0.4024052978138	-4.86414745987868	1.14951193164914e-06	9.99924789452001e-06	18069	chr18	57550009	57553839	3831	*	8.76	8.95	8.54	-0.41	0.0384	0.206	554.33	437.91	358.5	387	Promoter (<=1kb)	18	57373455	57552397	178943	2	75084	uc008ezc.2	0	ENSMUSG00000086607	RIKEN cDNA 4930511M06 gene	uc008ezc.2;uc008ezi.2;uc008ezj.2;uc008ezk.2;uc008ezg.3;uc008ezh.3	75084;75084;75084;75084;75444;75444	0;0;0;0;0;0	Unchanged	FGF_down	Unchanged
4930512B01Rik	21.288050733294	1.10554660739188	0.47033963016826	2.35052829164402	0.0187467824541383	0.049603473573662	8188	chr12	69790810	69791185	376	*	3.61	3.77	3.43	-0.35	0.647	0.896	15.65	11.7	9.51	12	Promoter (<=1kb)	12	69790344	69841880	51537	1	74724	uc011ynd.1	466	NA	RIKEN cDNA 4930512B01 gene	uc007nst.1;uc011ynd.1	71091;74724	0;0	Unchanged	FGF_up	Unchanged
4930520O04Rik	8.56281305662721	-0.990758828468437	0.710455512815795	-1.39454027816843	0.16315451529953	0.281145150931369	39634	chr9	114367915	114368977	1063	*	5.78	6.04	5.48	-0.56	0.173	0.509	81.03	50.14	34.23	55	Promoter (<=1kb)	9	114368324	114377238	8915	1	75116	uc009rxf.3	0	ENSMUSG00000074039	RIKEN cDNA 4930520O04 gene	uc009rxe.1;uc009rxf.3;uc029xgi.1;uc057mas.1;uc057mat.1;uc057mau.1	75100;75116;75116;75116;75116;75116	-3288;0;0;0;0;0	Unchanged	Unchanged	Unchanged
4930526I15Rik	38.0721569776712	0.0798439434139005	0.34862352529262	0.229026263637495	0.818848503154806	0.887698622195578	39837	chr9	124422496	124426388	3893	*	9.14	9.08	9.2	0.12	0.502	0.823	572.75	508.95	592.43	583	Promoter (<=1kb)	9	124423251	124424856	1606	1	75135	uc012hdi.2	0	NA	RIKEN cDNA 4930526I15 gene	uc012hdi.2;uc029xhd.2	75135;75135	0;0	Unchanged	Unchanged	Unchanged
4930539J05Rik	12.7620302549898	0.482403790245145	0.552354242145715	0.873359437543494	0.382467192737215	0.528619541274425	24817	chr3	135438355	135441033	2679	*	8.91	8.92	8.9	-0.02	0.938	0.985	559.86	406.15	433.63	521	Promoter (<=1kb)	3	135436220	135438665	2446	2	319587	uc012cyc.3	0	ENSMUSG00000097032	RIKEN cDNA 4930539J05 gene	uc012cyc.3;uc008rln.1;uc008rlo.1;uc008rlp.1;uc012cyd.4;uc008rlq.1	319587;66105;66105;66105;66105;66105	0;0;0;0;0;0	Unchanged	Unchanged	Unchanged
4930550C14Rik	7.54825604493013	-1.53944349805791	0.73972610560259	-2.08109932365285	0.037424815751815	0.0871762615212811	38264	chr9	53401819	53405965	4147	*	8.42	8.41	8.42	0	0.983	0.997	365.57	316.73	327.12	357	Promoter (<=1kb)	9	53405286	53432803	27518	1	75311	uc009pmc.1	0	ENSMUSG00000005131	RIKEN cDNA 4930550C14 gene	uc033jkn.1;uc009pmb.1;uc009pmc.1	102466640;68304;75311	-933;0;0	Unchanged	Unchanged	Unchanged
4930556M19Rik	7.85456900061183	-1.09353068500704	0.716532993222339	-1.52614142733232	0.126974646795854	0.231447457450671	12448	chr15	10713336	10715564	2229	*	7.57	7.48	7.67	0.19	0.41	0.762	197.06	158.78	212.06	194	Promoter (<=1kb)	15	10714836	10718467	3632	1	75259	uc007vgq.1	0	ENSMUSG00000096971	RIKEN cDNA 4930556M19 gene	uc007vgq.1;uc029snu.1;uc007vgr.2;uc007vgs.1;uc007vgt.2;uc007vgl.1;uc007vgm.1;uc007vgn.2;uc007vgo.2	75259;75259;75259;75259;75259;75646;75646;75646;75646	0;0;0;0;-1580;0;0;0;0	Unchanged	Unchanged	Unchanged
4930577N17Rik	11.9181162550437	0.542751054235172	0.616848619361707	0.879877229516687	0.378925821347554	0.524909760865317	23458	chr3	51276285	51278243	1959	*	8.61	8.69	8.52	-0.17	0.425	0.773	476.06	350.16	342.34	392	Promoter (<=1kb)	3	51276761	51278407	1647	1	67746	uc008pdu.2	0	ENSMUSG00000087440	RIKEN cDNA 4930577N17 gene	uc008pdu.2;uc008pdo.2;uc008pdp.2;uc008pdq.2;uc008pdr.2;uc008pds.2;uc057lfr.1;uc012cpi.2	67746;69257;69257;69257;69257;69257;69257;69257	0;0;0;0;0;0;0;0	Unchanged	Unchanged	Unchanged
4930579G24Rik	69.1446139680081	-1.4353547447742	0.26926667204762	-5.33060676933817	9.78851640734159e-08	1.06260080018662e-06	23743	chr3	79629041	79630294	1254	*	6.78	6.85	6.71	-0.14	0.638	0.891	138.12	91.93	102.7	106	Promoter (<=1kb)	3	79629079	79632820	3742	1	75939	uc008pnu.3	0	ENSMUSG00000027811	RIKEN cDNA 4930579G24 gene	uc008pnq.2;uc008pnr.2;uc008pns.2;uc008pnt.2;uc008pnu.3	66841;66841;66841;66841;75939	0;0;0;0;0	Unchanged	FGF_down	Unchanged
4930592A05Rik	40.7208895763104	0.268339102434567	0.369023132338489	0.72716065449369	0.467127545806738	0.609909157470192	12592	chr15	33644316	33644920	605	*	4.92	5.04	4.81	-0.23	0.67	0.907	31.31	34.26	39.94	16	Exon (uc029soi.1/75880, exon 3 of 6)	15	33593881	33653436	59556	2	75880	uc029soi.1	8516	ENSMUSG00000115779	RIKEN cDNA 4930592A05 gene	uc029soi.1	75880	0	Unchanged	Unchanged	Unchanged
4931406C07Rik	10.8749601742939	-0.00468220496574854	0.585273914681426	-0.00800002331950355	0.993616972993396	0.996451590973072	37693	chr9	15305424	15309582	4159	*	8.83	8.87	8.78	-0.09	0.666	0.905	523.95	412	445.04	437	Promoter (<=1kb)	9	15283337	15306167	22831	2	70984	uc009ofn.2	0	ENSMUSG00000031938	RIKEN cDNA 4931406C07 gene	uc033jiu.1;uc009ofm.2;uc009ofn.2;uc012gop.1;uc009ofo.2;uc009ofp.2;uc009ofq.2;uc009ofr.2;uc009ofs.2	102465758;70984;70984;70984;70984;75316;75316;75316;75316	-3029;0;0;0;0;0;0;0;0	Unchanged	Unchanged	Unchanged
4931406H21Rik	2.53075072578598	0.717604234864686	1.19381971710102	0.60109933232403	0.547773828067756	0.679305829321911	11218	chr14	25585250	25590792	5543	*	9.26	9.29	9.23	-0.07	0.725	0.927	692.46	563.27	600.04	600	Promoter (<=1kb)	14	25586804	25590661	3858	1	77592	uc007srp.1	0	NA	RIKEN cDNA 4931406H21 gene	uc007srm.2;uc007srn.3;uc007sro.3;uc007srp.1	328365;328365;328365;77592	0;0;0;0	Unchanged	Unchanged	Unchanged
4931406P16Rik	888.467222208346	-0.0540743190888819	0.141630721419317	-0.381797949957393	0.702611239487754	0.803752826795333	33307	chr7	34312145	34315740	3596	*	8.49	8.43	8.55	0.12	0.604	0.877	424.5	264.92	397.49	352	Promoter (<=1kb)	7	34236714	34313522	76809	2	233103	uc009gja.1	0	ENSMUSG00000066571	RIKEN cDNA 4931406P16 gene	uc009gja.1	233103	0	Unchanged	Unchanged	Unchanged
4931408D14Rik	6.67090138095729	-2.43088037691083	0.941175907929183	-2.58281194453794	0.00979987239661385	0.0289205123171182	19420	chr19	37263273	37265890	2618	*	7.84	8.13	7.47	-0.66	0.00245	0.0296	279.93	279.96	190.19	164	Promoter (<=1kb)	19	37258423	37264095	5673	2	77059	uc008hij.3	0	NA	RIKEN cDNA 4931408D14 gene	uc008hil.2;uc008hij.3;uc008hik.3	15925;77059;77059	68654;0;0	Unchanged	FGF_down	FGF_down
4931414P19Rik	30.5276218198225	-2.08254421304343	0.446558325440892	-4.66354358299627	3.10810321967829e-06	2.44878376279466e-05	11672	chr14	54605048	54606622	1575	*	6.64	6.96	6.23	-0.73	0.0162	0.115	145.49	103.63	69.42	81	Promoter (<=1kb)	14	54583663	54605908	22246	2	74359	uc007twk.1	0	ENSMUSG00000022179	RIKEN cDNA 4931414P19 gene	uc007twk.1	74359	0	Unchanged	FGF_down	Unchanged
4931428F04Rik	128.338335657942	0.488507154635581	0.202699533446992	2.41000630997176	0.0159522446217317	0.0433799816575244	36758	chr8	105289303	105289884	582	*	5.12	5.17	5.07	-0.09	0.852	0.963	44.2	27.58	31.38	36	Promoter (<=1kb)	8	105280409	105289528	9120	2	74356	uc009nce.2	0	ENSMUSG00000014837	RIKEN cDNA 4931428F04 gene	uc009nci.1;uc009ncj.1;uc009ncf.1;uc009nce.2;uc009ncg.2;uc009nch.2	277978;277978;74356;74356;74356;74356	0;0;0;0;0;0	Unchanged	FGF_up	Unchanged
4931440P22Rik	7.03441937556712	0.333464222446017	0.718990778625675	0.463794852951274	0.642794731326175	0.758408946575562	23645	chr3	65527081	65530287	3207	*	8.79	8.67	8.9	0.23	0.259	0.621	465.01	351	467.86	487	Promoter (<=1kb)	3	65515315	65529414	14100	2	71004	uc008pkq.2	0	ENSMUSG00000074580	RIKEN cDNA 4931440P22 gene	uc008pkq.2;uc012cqe.2;uc008pkr.1	71004;71004;99929	0;0;0	Unchanged	Unchanged	Unchanged
4932438A13Rik	946.496225820306	0.0997561894621375	0.187436788406108	0.532212434444842	0.594578871826269	0.718835391064897	23399	chr3	36862517	36863740	1224	*	6.53	6.56	6.5	-0.06	0.843	0.96	104.05	85.24	85.58	96	Promoter (<=1kb)	3	36863106	36943396	80291	1	229227	uc008ozw.2	0	ENSMUSG00000037270	RIKEN cDNA 4932438A13 gene	uc008ozw.2;uc008ozx.2;uc008pab.2;uc008ozy.1;uc008ozz.1;uc008paa.1	229227;229227;229227;229227;229227;229227	0;0;0;0;-647;-647	Unchanged	Unchanged	Unchanged
4933404O12Rik	95.0604781627821	-1.12337496055044	0.240785933737349	-4.66545093857443	3.0794096578069e-06	2.42777732388576e-05	29782	chr5	136918838	136920053	1216	*	6.59	6.84	6.3	-0.53	0.0764	0.318	131.68	96.94	77.03	81	Promoter (<=1kb)	5	136919146	136937109	17964	1	66752	uc009abd.2	0	ENSMUSG00000097908	RIKEN cDNA 4933404O12 gene	uc009abd.2;uc009abe.2	66752;66752	0;0	Unchanged	FGF_down	Unchanged
4933406I18Rik	4.04695442882409	2.31798635502029	1.15868118434827	2.00053853150648	0.0454421435313692	0.101937781435234	34693	chr7	114414375	114415113	739	*	5.16	5.21	5.1	-0.11	0.812	0.951	41.44	32.59	27.58	41	Promoter (<=1kb)	7	114315479	114415161	99683	2	71045	uc009jia.2	48	ENSMUSG00000087475	RIKEN cDNA 4933406I18 gene	uc009jic.1;uc009jia.2;uc009jib.1	18576;71045;71045	0;0;0	Unchanged	Unchanged	Unchanged
4933407K13Rik	28.5355605359369	0.347741766483158	0.390217381796948	0.891148838326498	0.372849327211025	0.518955692900975	40255	chrX	75763901	75765410	1510	*	6.16	6.1	6.21	0.11	0.725	0.926	70.9	66.02	73.22	75	Promoter (<=1kb)	20	75725458	75764699	39242	2	74396	uc009tqh.2	0	ENSMUSG00000087396	RIKEN cDNA 4933407K13 gene	uc009tqh.2;uc057mbn.1	74396;74396	0;0	Unchanged	Unchanged	Unchanged
4933412O06Rik	39.829870689268	4.3840952793831	1.27529111287171	3.43772118783997	0.000586631387754233	0.0025758333381479	9303	chr13	15802027	15802536	510	*	4.04	3.4	4.48	1.08	0.102	0.377	11.97	9.19	24.72	20	Promoter (<=1kb)	13	15781664	15802630	20967	2	71071	uc029rza.1	94	ENSMUSG00000113960	RIKEN cDNA 4933412O06 gene	uc007pnt.1;uc029rza.1	328190;71071	-4707;0	Unchanged	FGF_up	Unchanged
4933421O10Rik	32.5351120133693	-0.908302230795945	0.408483659290296	-2.22359502060386	0.026175703882618	0.0652590765133604	25256	chr4	33030316	33032370	2055	*	8.36	8.31	8.4	0.09	0.653	0.899	357.28	277.45	327.12	350	Promoter (<=1kb)	4	33027139	33031323	4185	2	100504166	uc008sfo.2	0	ENSMUSG00000085037	RIKEN cDNA 4933421O10 gene	uc008sfo.2;uc008sfp.1	100504166;56228	0;0	Unchanged	Unchanged	Unchanged
4933434E20Rik	523.112881188329	0.307808204160216	0.159890791811865	1.92511526568958	0.0542149395571915	0.117472254820079	24030	chr3	90052865	90053954	1090	*	6.82	6.79	6.84	0.05	0.866	0.966	131.68	90.26	114.11	115	Promoter (1-2kb)	3	90051636	90063341	11706	1	99650	uc008qbd.3	1229	ENSMUSG00000027942	RIKEN cDNA 4933434E20 gene	uc008qal.2;uc008qam.2;uc008qap.2;uc008qao.2;uc008qaq.2;uc008qas.3;uc008qat.3;uc008qau.2;uc008qav.2;uc008qaw.1;uc008qaz.2;uc008qbd.3;uc008qba.3;uc008qbb.3;uc008qbc.3;uc012csq.2	74383;74383;74383;74383;74383;74383;74383;74383;74383;74383;74383;99650;99650;99650;99650;99650	0;0;0;0;0;0;0;0;0;0;0;0;0;0;0;0	Unchanged	Unchanged	Unchanged
4933440J02Rik	4.9625780575504	4.68164624963053	1.47947632270105	3.16439416960951	0.00155406168536769	0.00600072883822242	4034	chr10	111599523	111601142	1620	*	6.64	6.18	6.98	0.8	0.00529	0.0521	76.43	68.53	117.92	135	Distal Intergenic	10	111586719	111594273	7555	2	71321	uc029rfn.1	-5250	ENSMUSG00000097082	RIKEN cDNA 4933440J02 gene	NA	NA	NA	Unchanged	FGF_up	Unchanged
5031425E22Rik	46.9738166494085	0.273953181719855	0.310507435457066	0.882275753933545	0.37762770477507	0.523926475144626	27768	chr5	23431482	23436692	5211	*	10.04	10.06	10.01	-0.05	0.79	0.945	1255.08	881.67	997.53	1063	Promoter (<=1kb)	5	23431808	23434353	2546	2	269630	uc008wpy.2	0	ENSMUSG00000073147	RIKEN cDNA 5031425E22 gene	uc008wpy.2;uc008wpz.2;uc008wqa.2	269630;69188;69188	0;0;0	Unchanged	Unchanged	Unchanged
5031434O11Rik	4.08369113480935	-1.1142757850284	0.958345944227012	-1.16270725800083	0.244948295844954	0.382917349812671	23480	chr3	51558970	51562258	3289	*	9.03	9	9.06	0.06	0.745	0.932	586.56	434.57	534.43	533	Promoter (<=1kb)	3	51559757	51567117	7361	1	100039684	uc012cpj.2	0	NA	RIKEN cDNA 5031434O11 gene	uc012cpj.2;uc008peb.1	100039684;73251	0;0	Unchanged	Unchanged	Unchanged
5031439G07Rik	1763.03273786496	1.28068301017801	0.148131853347886	8.64556124313344	5.35414726214989e-18	2.40574316079757e-16	13771	chr15	84986956	84988778	1823	*	7.51	7.13	7.81	0.69	0.0125	0.0961	179.56	100.28	213.96	236	Promoter (<=1kb)	15	84945720	84987971	42252	2	223739	uc007xcr.1	0	ENSMUSG00000036046	RIKEN cDNA 5031439G07 gene	uc007xcr.1	223739	0	Unchanged	FGF_up	Unchanged
5033406O09Rik	77.1321127105075	1.05928279377328	0.260440569733154	4.06727260218567	4.75665876874351e-05	0.000282422183825248	9117	chr12	111942834	111946942	4109	*	9.32	8.94	9.62	0.67	0.000494	0.00876	564.46	421.2	794.03	778	Promoter (<=1kb)	12	111941991	111944482	2492	2	77675	uc007pee.2	0	ENSMUSG00000113769	RIKEN cDNA 5033406O09 gene	uc007pee.2;uc011yuz.1	77675;77675	0;0	Unchanged	FGF_up	FGF_up
5430416N02Rik	60.7252467789076	0.469253428550392	0.286531821954397	1.63770092044114	0.10148409852113	0.194293803218329	28704	chr5	100428429	100431169	2741	*	8.06	8.06	8.06	0	0.996	0.999	285.45	246.53	291.94	240	Promoter (<=1kb)	5	100420842	100429535	8694	2	100503199	uc008yhl.2	0	ENSMUSG00000097772	RIKEN cDNA 5430416N02 gene	uc008yhl.2;uc008yhm.2	100503199;100503199	0;0	Unchanged	Unchanged	Unchanged
5430425K12Rik	5.79052755646382	3.37392280113627	1.18751238244097	2.84116852255559	0.00449485528620475	0.0149395344844941	10355	chr13	80940067	80941621	1555	*	6.33	5.97	6.62	0.65	0.0445	0.226	55.25	70.2	108.41	88	Promoter (<=1kb)	13	80940403	80948597	8195	1	71416	uc033gmn.1	0	NA	RIKEN cDNA 5430425K12 gene	uc033gmn.1;uc007rhk.1	71416;71416	0;0	Unchanged	FGF_up	Unchanged
5530601H04Rik	26.6187470613323	0.150109715013943	0.391371081462151	0.383548305237927	0.701313261107586	0.803202081815448	40456	chrX	105069720	105070418	699	*	4.54	4.51	4.58	0.07	0.893	0.974	30.39	15.04	24.72	23	Promoter (<=1kb)	20	105037350	105070119	32770	2	71445	uc009uao.1	0	ENSMUSG00000087174	RIKEN cDNA 5530601H04 gene	uc009uao.1;uc009ual.2;uc009uam.2;uc009uan.2;uc012hnk.1;uc009uap.2;uc009uaq.2;uc009uar.2;uc057mcb.1	71445;71445;71445;71445;71445;71445;71445;71445;71445	0;0;0;0;0;0;0;0;0	Unchanged	Unchanged	Unchanged
5730409E04Rik	122.213090362315	-0.874426449402271	0.2037070929968	-4.29256751219756	1.76618822526748e-05	0.000116177664658211	26482	chr4	126609240	126610297	1058	*	6.6	6.75	6.43	-0.32	0.269	0.632	116.02	99.45	90.34	82	Promoter (<=1kb)	4	126609854	126614371	4518	1	230757	uc008utp.2	0	ENSMUSG00000073755	RIKEN cDNA 5730409E04Rik gene	uc008utp.2;uc012dlg.1	230757;230757	0;0	Unchanged	FGF_down	Unchanged
5730455P16Rik	166.166974218619	-0.525139240414503	0.185811729848966	-2.82618993344152	0.00471053240002952	0.0155568619080279	6067	chr11	80377346	80378939	1594	*	7.06	7.05	7.06	0.01	0.957	0.991	143.65	121.18	132.18	135	Promoter (<=1kb)	11	80360492	80378015	17524	2	70591	uc007klv.2	0	ENSMUSG00000057181	RIKEN cDNA 5730455P16 gene	uc007klw.2;uc007kly.2;uc007klz.2;uc007kma.2;uc007kmb.2;uc007kmc.4;uc007klv.2	22680;22680;22680;22680;22680;22680;70591	0;0;0;0;0;0;0	Unchanged	FGF_down	Unchanged
5830417I10Rik	139.657946159005	0.176569870740938	0.194820638956785	0.906320150095107	0.364766423172781	0.510920929305177	23969	chr3	88774627	88775819	1193	*	6.86	6.99	6.71	-0.27	0.346	0.708	146.41	106.97	115.06	95	Promoter (<=1kb)	3	88775239	88854795	79557	1	100302730	uc008pwo.1	0	NA	gon-4-like pseudogene	uc008pwo.1;uc008pwv.2;uc008pwk.1;uc008pwl.1;uc008pwm.1	100302730;100302730;229521;229521;229521	0;-1165;0;0;0	Unchanged	Unchanged	Unchanged
5830428M24Rik	4.21832066370526	2.03020540448918	1.27906266771336	1.58726030845594	0.112453700799228	0.210741316334313	8167	chr12	69473290	69475830	2541	*	8.61	8.52	8.7	0.18	0.371	0.73	410.69	321.75	421.27	408	Promoter (<=1kb)	12	69464787	69475550	10764	2	76062	uc007nsk.2	0	ENSMUSG00000113035	RIKEN cDNA 5830428M24 gene	uc007nsk.2;uc057koj.1	76062;76062	0;0	Unchanged	Unchanged	Unchanged
5930430L01Rik	28.6401408683562	-0.395626758784723	0.382172544206569	-1.03520455559173	0.300573391730561	0.445943999524928	30306	chr5	148994041	148996607	2567	*	8.98	9.09	8.87	-0.23	0.26	0.623	629.84	463.82	445.99	487	Promoter (<=1kb)	5	148990056	148995215	5160	2	319982	uc009aoz.1	0	ENSMUSG00000106951	RIKEN cDNA 5930430L01 gene	uc009aoz.1;uc033inx.3	319982;319982	0;0	Unchanged	Unchanged	Unchanged
6030469F06Rik	2.39756164301994	-2.63063424553553	1.47397156468054	-1.78472523389939	0.0743058958220138	0.151148313212573	7823	chr12	31168060	31169736	1677	*	5.64	6.18	4.78	-1.4	0.00285	0.0331	101.29	43.46	21.87	33	Promoter (<=1kb)	12	31168862	31185922	17061	1	100043065	uc033gcz.1	0	ENSMUSG00000095953	RIKEN cDNA 6030469F06 gene	uc033gcz.1	100043065	0	FGF_down	Unchanged	Unchanged
6330415G19Rik	10.2313106567016	-0.505945260170802	0.624701944835241	-0.809898647432962	0.417998429285044	0.564321295741432	15879	chr17	23550378	23551280	903	*	5.79	5.68	5.89	0.21	0.576	0.865	57.09	45.13	70.37	48	Promoter (<=1kb)	17	23550799	23561634	10836	1	320020	uc056zdm.1	0	ENSMUSG00000117322	RIKEN cDNA 6330415G19 gene	uc056zdm.1;uc056zdn.1	320020;320020	0;0	Unchanged	Unchanged	Unchanged
6330549D23Rik	3.4503133431942	-0.11601982596545	1.031596678594	-0.112466265521112	0.910453716222703	0.945662884878226	24271	chr3	96629079	96630742	1664	*	7.38	7.31	7.46	0.15	0.526	0.838	178.64	137.89	174.97	177	Promoter (<=1kb)	3	96606662	96629819	23158	2	229613	uc008qni.2	0	ENSMUSG00000045327	RIKEN cDNA 6330549D23 gene	uc008qnm.2;uc008qnn.2;uc008qno.2;uc008qnp.2;uc008qni.2;uc008qnh.1;uc008qnk.2;uc008qnl.2	18632;18632;18632;18632;229613;280411;60365;60365	0;0;0;0;0;0;0;0	Unchanged	Unchanged	Unchanged
6430548M08Rik	420.707532531037	-0.275669902680646	0.174723190508418	-1.57775222555453	0.114622543136051	0.213898232145911	37177	chr8	120143389	120145026	1638	*	6.31	5.91	6.62	0.71	0.0476	0.236	74.59	45.96	75.12	122	Promoter (<=1kb)	8	120144929	120165307	20379	1	234797	uc009nqw.2	0	ENSMUSG00000031824	RIKEN cDNA 6430548M08 gene	uc009nqs.1;uc009nqt.1;uc009nqu.2;uc009nqv.2;uc009nqw.2	234797;234797;234797;234797;234797	0;0;0;0;0	Unchanged	Unchanged	Unchanged
6430550D23Rik	3.42123004915417	0.657011610208587	1.03242420578338	0.636377572831182	0.52453035498557	0.659470834051532	22619	chr2	156007556	156007837	282	*	3.66	3.51	3.8	0.28	0.731	0.928	11.97	10.86	23.77	4	Promoter (<=1kb)	2	156000443	156007977	7535	2	320095	uc008nlw.2	140	ENSMUSG00000074646	RIKEN cDNA 6430550D23 gene	uc012chn.1;uc008nlw.2;uc008nlx.1;uc008nly.1	320095;320095;66366;66366	-3129;0;0;0	Unchanged	Unchanged	Unchanged
6430562O15Rik	16.8674063027089	-0.283040526235445	0.492478154926734	-0.574727068406827	0.565475897819761	0.694903689651829	10624	chr13	99409723	99413325	3603	*	7.42	7.14	7.65	0.5	0.0317	0.182	134.44	147.92	206.35	194	Promoter (<=1kb)	13	99410836	99412826	1991	2	320893	uc007rpp.2	0	NA	RIKEN cDNA 6430562O15 gene	uc007rpn.1;uc007rpp.2	218506;320893	0;0	Unchanged	Unchanged	Unchanged
6530402F18Rik	319.297941447033	0.98271721163296	0.189275619369303	5.19199046822581	2.08057657798932e-07	2.13634460997667e-06	20436	chr2	29251353	29253938	2586	*	7.87	7.9	7.85	-0.05	0.819	0.953	263.35	213.94	196.84	263	Promoter (<=1kb)	2	29243238	29252040	8803	2	76220	uc008izq.1	0	ENSMUSG00000079499	RIKEN cDNA 6530402F18 gene	uc008izo.2;uc008izp.2;uc012btf.2;uc008izq.1	171171;171171;171171;76220	0;0;0;0	Unchanged	FGF_up	Unchanged
6720489N17Rik	20.5035134138888	-1.8904038858194	0.532699092154566	-3.54872744042688	0.000387097536605464	0.0017894762319801	10182	chr13	62623621	62624172	552	*	4.79	4.9	4.66	-0.24	0.669	0.906	41.44	18.39	25.68	25	Promoter (<=1kb)	13	62603015	62624182	21168	2	211378	uc007qxb.2	10	ENSMUSG00000072066	RIKEN cDNA 6720489N17 gene	uc007qxb.2;uc057kqh.1	211378;211378	0;0	Unchanged	FGF_down	Unchanged
6820431F20Rik	17.0477072756077	-0.282206590399978	0.483789862233781	-0.583324729247029	0.559674718225597	0.68982491824609	35577	chr8	20296762	20297487	726	*	7.5	7.5	7.5	0	0.996	0.999	219.16	142.91	168.32	193	Promoter (<=1kb)	8	20268053	20297432	29380	2	547150	uc029wqz.1	0	ENSMUSG00000071796	cadherin 11 pseudogene	uc029wqz.1;uc029wra.1;uc029wrc.1	547150;547150;547150	0;0;0	Unchanged	Unchanged	Unchanged
8030462N17Rik	480.838463517141	0.826929350370715	0.143770665859436	5.75172512019387	8.83373486139321e-09	1.16922258098972e-07	18504	chr18	77712461	77714522	2062	*	8.14	8.07	8.2	0.12	0.576	0.865	309.4	229.82	319.52	268	Promoter (<=1kb)	18	77633281	77714010	80730	2	212163	uc008frn.1	0	ENSMUSG00000047466	RIKEN cDNA 8030462N17 gene	uc008frn.1;uc008fro.1;uc008frq.1;uc008frr.2	212163;212163;212163;67640	0;0;0;0	Unchanged	FGF_up	Unchanged
8430429K09Rik	25.1486106093981	-0.112107907121486	0.432183948898411	-0.259398590362359	0.795327717230809	0.872683659879421	4470	chr11	3454902	3456146	1245	*	5.33	5.01	5.6	0.58	0.182	0.522	38.67	25.91	43.74	53	Promoter (2-3kb)	11	3452437	3458342	5906	1	71523	uc029rke.1	2465	ENSMUSG00000034587	RIKEN cDNA 8430429K09 gene	uc007hsv.2;uc007hsw.2;uc056yje.1;uc056yjf.1;uc029rke.1;uc007hsy.2;uc007hsx.2	193670;193670;193670;193670;71523;71523;71523	0;0;0;0;0;0;0	Unchanged	Unchanged	Unchanged
9130019O22Rik	28.9759554670733	0.298646646074702	0.373341893572763	0.79992803169435	0.423752495587558	0.569770483435988	34977	chr7	127386484	127387795	1312	*	6.42	6.13	6.67	0.54	0.076	0.317	74.59	65.19	109.36	94	Promoter (<=1kb)	7	127382260	127387166	4907	2	78921	uc009jve.1	0	ENSMUSG00000030823	RIKEN cDNA 9130019O22 gene	uc009jvg.2;uc012fud.1;uc029wov.1;uc009jve.1	101604;101604;233887;78921	0;0;0;0	Unchanged	Unchanged	Unchanged
9130023H24Rik	45.3205226679508	0.103024420281189	0.307931789412369	0.334568965671884	0.73795025879538	0.831759854123198	35024	chr7	128237183	128238385	1203	*	7.74	7.68	7.8	0.12	0.606	0.878	236.65	173.83	214.91	231	Promoter (<=1kb)	7	128234451	128238031	3581	2	100043133	uc009jyj.2	0	ENSMUSG00000062944	RIKEN cDNA 9130023H24 gene	uc009jyj.2;uc009jyk.1	100043133;233912	0;0	Unchanged	Unchanged	Unchanged
9130230L23Rik	11.6003572347834	1.88132468471409	0.69722112564531	2.6983185326934	0.00696907218372698	0.0216012320383571	28415	chr5	66000831	66001763	933	*	5.22	4.84	5.53	0.69	0.116	0.409	30.39	26.74	49.45	43	Promoter (2-3kb)	5	65987928	66004285	16358	2	231253	uc008xoi.2	2522	ENSMUSG00000054598	RIKEN cDNA 9130230L23 gene	uc008xoi.2;uc008xoj.1	231253;231253	0;0	Unchanged	FGF_up	Unchanged
9130401M01Rik	248.185123401595	-0.176376077751301	0.161569807291839	-1.09164008243642	0.274991330940953	0.417570370652556	12922	chr15	58033509	58035313	1805	*	7.1	7.05	7.15	0.1	0.691	0.915	137.2	127.86	135.98	148	Promoter (<=1kb)	15	58022259	58034294	12036	2	75758	uc007vta.1	0	ENSMUSG00000101892	RIKEN cDNA 9130401M01 gene	uc007vta.1;uc007vtc.2	75758;75758	0;0	Unchanged	Unchanged	Unchanged
9230112J17Rik	53.1892455032501	-0.75909558678342	0.304031115229697	-2.49676940536142	0.0125330427001533	0.0354460308452987	38483	chr9	60544404	60546514	2111	*	7.68	7.66	7.7	0.04	0.871	0.968	219.16	186.36	221.57	194	Promoter (<=1kb)	9	60523967	60545882	21916	2	100504561	uc009pza.1	0	ENSMUSG00000111761	RIKEN cDNA 9230112J17 gene	uc009pza.1;uc029xbl.1	100504561;100504561	0;0	Unchanged	FGF_down	Unchanged
9230116N13Rik	2.0450865489624	-1.0954453812463	1.35485458753045	-0.808533543989408	0.418783503899358	0.564996098725039	1361	chr1	136414619	136416139	1521	*	7.23	7.15	7.3	0.15	0.545	0.848	149.17	135.38	149.3	166	Promoter (<=1kb)	1	136411916	136415519	3604	2	320054	uc007cus.1	0	ENSMUSG00000097403	RIKEN cDNA 9230116N13 gene	uc007cus.1;uc007cut.1;uc007cuu.2	320054;67997;67997	0;0;0	Unchanged	Unchanged	Unchanged
9330020H09Rik	38.0583734113603	0.214004444739813	0.357857060665329	0.598016549797664	0.549828890315111	0.68141382175925	13972	chr15	98566636	98567753	1118	*	8.26	8.36	8.15	-0.21	0.344	0.707	388.59	269.93	277.67	290	Promoter (<=1kb)	15	98567324	98570864	3541	1	100048895	uc007xmx.2	0	NA	RIKEN cDNA 9330020H09 gene	uc007xmx.2;uc007xmv.1;uc007xmw.1;uc007xmy.2	100048895;12455;12455;73863	0;0;0;-3251	Unchanged	Unchanged	Unchanged
9330133O14Rik	12.7970452207953	-0.0482704143095428	0.564919708414015	-0.0854465043272427	0.931906423213046	0.959590406672566	37313	chr8	122443637	122445132	1496	*	6.77	6.67	6.87	0.19	0.482	0.812	109.58	94.43	107.46	126	Promoter (<=1kb)	8	122443656	122446476	2821	1	100689703	uc009nsu.2	0	NA	RIKEN cDNA 9330133O14 gene	uc009nsu.2;uc009nss.2;uc009nst.2;uc029wwq.1	100689703;192156;192156;319574	0;0;0;6190	Unchanged	Unchanged	Unchanged
9330136K24Rik	5.63834068747487	-1.10148520907042	0.834253683876842	-1.32032405772754	0.186726846649188	0.311375333545173	15852	chr17	21533767	21534540	774	*	5.61	5.64	5.59	-0.06	0.896	0.974	58.93	40.95	36.14	60	Promoter (1-2kb)	17	21528196	21535878	7683	2	319870	uc056zdl.1	1338	ENSMUSG00000097781	RIKEN cDNA 9330136K24 gene	uc008arb.1;uc008ara.4;uc056zdl.1	22710;24132;319870	0;0;0	Unchanged	Unchanged	Unchanged
9330159M07Rik	3.24839434887895	-0.338380360582352	1.0404166885865	-0.325235421821301	0.745002901939134	0.836396269394752	39141	chr9	88858511	88858846	336	*	4.41	4.62	4.17	-0.45	0.434	0.779	26.7	22.56	19.02	17	Promoter (<=1kb)	9	88841798	88858801	17004	2	319673	uc009qzd.1	0	ENSMUSG00000097177	RIKEN cDNA 9330159M07 gene	uc009qzd.1;uc057mah.1;uc009qze.2;uc009qzf.2	319673;319673;319673;319673	0;0;0;0	Unchanged	Unchanged	Unchanged
9330182L06Rik	511.56681256111	-0.394927265953709	0.147313237145995	-2.68086747399568	0.00734315906829594	0.0226024818913915	27665	chr5	9265665	9266969	1305	*	6.32	6.36	6.28	-0.09	0.8	0.947	99.45	65.19	76.08	79	Promoter (<=1kb)	5	9266193	9411545	145353	1	231014	uc008wlh.1	0	ENSMUSG00000056004	RIKEN cDNA 9330182L06 gene	uc008wlh.1;uc012dsc.1;uc008wli.1;uc008wlj.1;uc008wlk.1;uc012dsd.1;uc012dse.1	231014;231014;231014;231014;231014;231014;231014	0;0;0;0;0;0;0	Unchanged	FGF_down	Unchanged
9430015G10Rik	228.247217362633	-0.730310540698279	0.202546501619365	-3.60564381442989	0.000311379988231973	0.00148271458938189	27609	chr4	156110002	156110784	783	*	6.6	6.54	6.65	0.12	0.682	0.911	100.37	85.24	109.36	92	Promoter (<=1kb)	4	156109998	156127263	17266	1	230996	uc008wgd.2	4	ENSMUSG00000059939	RIKEN cDNA 9430015G10 gene	uc008wgd.2;uc012drg.1;uc012drh.1	230996;230996;230996	0;0;0	Unchanged	FGF_down	Unchanged
9430018G01Rik	26.2313798513388	0.0231933085877786	0.402084260586803	0.0576827069876603	0.954001368582878	0.974132794301799	30982	chr6	43442257	43442923	667	*	4.9	4.98	4.82	-0.16	0.743	0.931	31.31	31.76	31.38	25	Promoter (<=1kb)	6	43442429	43474318	31890	1	319812	uc029vve.1	0	NA	RIKEN cDNA 9430018G01 gene	uc009bsq.2;uc009bsr.2;uc029vve.1	29807;29807;319812	0;0;0	Unchanged	Unchanged	Unchanged
9430037G07Rik	3.19199061742564	-1.47186833577747	1.15061025612141	-1.27920668875227	0.200824281071663	0.329026978391847	39138	chr9	88599142	88599442	301	*	4.29	4.58	3.92	-0.66	0.288	0.655	30.39	17.55	13.31	17	Promoter (<=1kb)	9	88595325	88599243	3919	2	320692	uc009qyw.1	0	ENSMUSG00000097073	RIKEN cDNA 9430037G07 gene	uc009qyw.1;uc057mag.1	320692;320692	0;0	Unchanged	Unchanged	Unchanged
9430038I01Rik	51.628304244638	0.432650256302276	0.313383811812678	1.38057627737609	0.167409281544906	0.286453218758013	35180	chr7	137410013	137411912	1900	*	7.28	7.38	7.18	-0.2	0.443	0.786	177.72	154.61	120.77	169	Promoter (<=1kb)	7	137375569	137410756	35188	2	77252	uc009ket.2	0	ENSMUSG00000040139	RIKEN cDNA 9430038I01 gene	uc009ket.2;uc009keu.2;uc009kev.2	77252;77252;77252	0;0;0	Unchanged	Unchanged	Unchanged
9430091E24Rik	11.3259068815014	-0.661885761979823	0.629256533071496	-1.05185361961847	0.292866713955525	0.437542870649555	36984	chr8	111144447	111146430	1984	*	7.43	7.29	7.56	0.26	0.301	0.668	187.85	126.19	184.48	192	Promoter (<=1kb)	8	111127444	111145498	18055	2	434350	uc009nlx.2	0	NA	RIKEN cDNA 9430091E24 gene	uc009nlx.2;uc009nly.2	434350;434350	0;0	Unchanged	Unchanged	Unchanged
9530027J09Rik	14.4132285434289	-0.0314319493762514	0.548823108364108	-0.0572715486961572	0.954328883993089	0.97438397586583	40095	chrX	48284851	48285358	508	*	4.82	4.9	4.74	-0.16	0.756	0.936	30.39	29.25	29.48	24	Promoter (<=1kb)	20	48276792	48285426	8635	2	100500713	uc029xju.1	68	ENSMUSG00000097197	RIKEN cDNA 9530027J09 gene	uc029xju.1;uc009tcb.1	100500713;72554	0;0	Unchanged	Unchanged	Unchanged
9530068E07Rik	4344.39340502211	-0.137606508349563	0.114447526393518	-1.2023545871705	0.229226175982996	0.363646304134426	5165	chr11	52395750	52397345	1596	*	7.83	7.78	7.87	0.09	0.697	0.916	249.54	191.38	219.67	249	Promoter (<=1kb)	11	52396428	52404242	7815	1	213673	uc007ivn.1	0	ENSMUSG00000036275	RIKEN cDNA 9530068E07 gene	uc007ivn.1;uc007ivo.1	213673;213673	0;0	Unchanged	Unchanged	Unchanged
9530077C05Rik	8.80724337327683	-1.69285504900148	0.744695854291072	-2.27321669544277	0.0230131246843799	0.0587594245305936	37848	chr9	22411264	22411971	708	*	5.76	5.97	5.51	-0.46	0.239	0.596	71.82	53.49	37.09	54	Promoter (<=1kb)	9	22411577	22425030	13454	1	68283	uc009ool.1	0	ENSMUSG00000036411	RIKEN cDNA 9530077C05 gene	uc009ool.1;uc009oom.2;uc009oon.2	68283;68283;68283	0;0;0	Unchanged	Unchanged	Unchanged
9530080O11Rik	3.74875062589054	0.326132384409531	0.989570331645825	0.329569686943946	0.741725130322987	0.833969779644434	25933	chr4	95967199	95968194	996	*	6.55	6.5	6.59	0.08	0.773	0.941	101.29	80.23	107.46	85	Promoter (<=1kb)	4	95959711	95967655	7945	2	319247	uc008tsz.2	0	ENSMUSG00000044125	RIKEN cDNA 9530080O11 gene	uc029uyb.1;uc008tsz.2;uc008tta.1;uc008ttb.1;uc008ttc.2	319247;319247;77963;77963;77963	0;0;0;0;0	Unchanged	Unchanged	Unchanged
9530082P21Rik	47.6347233146019	-0.953153785980215	0.307010728659349	-3.10462696252485	0.0019051914112653	0.00714940274644986	15899	chr17	23749155	23749924	770	*	5.06	5.03	5.09	0.06	0.887	0.972	36.83	28.41	35.18	33	Promoter (<=1kb)	17	23749236	23754065	4830	1	638247	uc008atf.1	0	ENSMUSG00000097006	RIKEN cDNA 9530082P21 gene	uc008ath.1;uc008ate.1;uc008atf.1;uc008atg.1;uc008atd.1	224613;638247;638247;638247;73016	13394;0;0;0;-3326	Unchanged	FGF_down	Unchanged
9930021J03Rik	343.177799737017	0.453845226600289	0.146941409924796	3.08861352856602	0.00201092844666808	0.00749140187195746	19346	chr19	29804736	29807169	2434	*	8.21	8.26	8.15	-0.11	0.672	0.907	376.62	235.67	245.34	323	Promoter (<=1kb)	19	29714402	29806009	91608	2	240613	uc008hdy.2	0	ENSMUSG00000046138	RIKEN cDNA 9930021J03 gene	uc008hdy.2;uc008heb.2	240613;240614	0;0	Unchanged	FGF_up	Unchanged
A130010J15Rik	35.1309690122424	0.219610316929038	0.358832671884043	0.612013158601135	0.540529051599499	0.673028776405585	2294	chr1	193172937	193173383	447	*	3.97	3.72	4.19	0.46	0.506	0.826	14.73	11.7	11.41	25	Intron (uc007eea.2/319266, intron 2 of 2)	1	193168049	193177832	9784	1	319266	uc007eea.2	4888	ENSMUSG00000079144	RIKEN cDNA A130010J15 gene	uc007eec.2;uc007eea.2;uc011wza.1;uc007eeb.2;uc011wzb.1;uc007edy.2	215243;319266;319266;319266;319266;54139	28163;0;0;0;0;19825	Unchanged	Unchanged	Unchanged
A230020J21Rik	17.1501949160668	-0.222557476515222	0.513847864229978	-0.433119395852181	0.664928032634182	0.776126564724305	2218	chr1	191025108	191026137	1030	*	6.07	6.07	6.07	0	1	1	71.82	62.68	70.37	64	Promoter (<=1kb)	1	191025351	191029781	4431	1	100125339	uc011wyo.1	0	ENSMUSG00000097845	RIKEN cDNA A230020J21 gene	uc011wyo.1;uc007ebv.1;uc011wyn.1;uc057awb.1	100125339;226844;226844;226844	0;0;0;0	Unchanged	Unchanged	Unchanged
A230028O05Rik	22.0788083204991	2.28007098612641	0.511033783373641	4.46168347437677	8.13182795631273e-06	5.76462679322952e-05	14772	chr16	25056175	25063183	7009	*	9.63	9.23	9.94	0.71	4.54e-05	0.00134	616.03	587.5	1049.84	915	Promoter (<=1kb)	16	25059639	25069058	9420	1	319487	uc007yuk.1	0	ENSMUSG00000096960	RIKEN cDNA A230028O05 gene	uc007yuk.1	319487	0	Unchanged	FGF_up	FGF_up
A230056P14Rik	16.2998042843134	-1.03097424355587	0.532185970518931	-1.93724431057545	0.0527154861132808	0.114826952802248	33664	chr7	55961515	55963161	1647	*	7.63	7.67	7.58	-0.09	0.715	0.923	231.13	176.33	163.56	219	Promoter (<=1kb)	7	55962531	55973080	10550	1	320845	uc009hds.1	0	NA	RIKEN cDNA A230056P14 gene	uc009hds.1;uc009hdt.2;uc009hdp.2;uc009hdq.2;uc009hdr.2;uc029wfs.1;uc029wft.1	320845;320845;93790;93790;93790;93790;93790	0;0;0;0;0;0;0	Unchanged	Unchanged	Unchanged
A230072C01Rik	14.2678521015123	-0.873760497865084	0.534282705278085	-1.63538982121891	0.101967354837965	0.19497271231198	40019	chrX	20962187	20962657	471	*	4.34	4.32	4.36	0.04	0.939	0.985	24.86	15.04	17.12	24	Promoter (<=1kb)	20	20961676	20987349	25674	1	320742	uc009sug.2	511	NA	RIKEN cDNA A230072C01 gene	uc009sue.1;uc009suf.1;uc009sug.2;uc009suh.2	22294;22294;320742;320742	0;0;0;0	Unchanged	Unchanged	Unchanged
A230103J11Rik	56.4555862690566	-0.404827060161077	0.283682234847055	-1.42704410228345	0.153567182910553	0.268849417042176	36533	chr8	85059644	85060786	1143	*	5.64	5.82	5.43	-0.39	0.337	0.702	63.54	49.31	34.23	52	Promoter (<=1kb)	8	85053160	85060460	7301	2	320466	uc009mpb.1	0	ENSMUSG00000087026	RIKEN cDNA A230103J11 gene	uc033jgl.1;uc009moz.3;uc009mpa.3;uc012gho.2;uc009mpb.1;uc009mpc.2;uc009mpd.2;uc009mpe.2	102465648;212999;212999;212999;320466;320466;68628;68628	-1300;0;0;0;0;0;0;0	Unchanged	Unchanged	Unchanged
A330009N23Rik	3.68178357096809	-0.338857666060936	1.11415387551659	-0.30413901841325	0.761021981556059	0.848482716749815	14161	chr15	101224184	101225189	1006	*	6.53	6.25	6.77	0.52	0.104	0.383	93.92	58.5	98.9	119	Promoter (<=1kb)	15	101221191	101224777	3587	2	380977	uc029svf.1	0	ENSMUSG00000097915	RIKEN cDNA A330009N23 gene	uc029svg.1;uc007xss.2;uc029svf.1;uc007xst.2;uc007xsu.1	105968;380977;380977;380977;56149	0;0;0;0;0	Unchanged	Unchanged	Unchanged
A330069E16Rik	5.92960251890338	0.662403507639635	0.795422342553563	0.832769551724062	0.404974710055057	0.551739968787566	21365	chr2	91237165	91238099	935	*	6.07	6.2	5.93	-0.27	0.45	0.791	89.32	57.66	63.71	58	Promoter (<=1kb)	2	91237146	91238357	1212	1	606735	uc008kvk.1	19	ENSMUSG00000097868	RIKEN cDNA A330069E16 gene	uc008kvg.3;uc008kvh.3;uc008kvi.3;uc008kvj.3;uc008kvk.1	107986;107986;107986;107986;606735	-1834;0;0;0;0	Unchanged	Unchanged	Unchanged
A330074K22Rik	17.5671255002943	-1.14845077690872	0.515181324879883	-2.22921663004087	0.0257994945640857	0.0644960382827761	37183	chr8	120226023	120229733	3711	*	7.91	7.7	8.09	0.38	0.129	0.433	257.83	158.78	249.15	294	Promoter (<=1kb)	8	120204434	120228230	23797	2	434353	uc009nqy.1	0	ENSMUSG00000097960	RIKEN cDNA A330074K22 gene	uc009nqy.1	434353	0	Unchanged	Unchanged	Unchanged
A330102I10Rik	3.60950054787567	-2.01686269576858	1.16398732234909	-1.73271878227872	0.083145664492709	0.165488256788819	9508	chr13	29014015	29015624	1610	*	6.76	6.91	6.58	-0.33	0.238	0.594	119.71	121.18	106.51	85	Promoter (<=1kb)	13	29014414	29028804	14391	1	77920	uc029rzp.1	0	ENSMUSG00000086363	RIKEN cDNA A330102I10 gene	uc029rzp.1;uc007pyl.2;uc029rzq.1;uc029rzr.1	77920;77920;77920;77920	0;-631;-631;-631	Unchanged	Unchanged	Unchanged
A430005L14Rik	179.552368079299	-0.44409312437093	0.178265330829662	-2.49119176625137	0.0127315382537363	0.0358958493275089	27515	chr4	153956346	153958256	1911	*	7.71	7.79	7.61	-0.18	0.478	0.808	265.2	178.84	169.27	222	Promoter (<=1kb)	4	153957237	153961925	4689	1	97159	uc008wau.3	0	ENSMUSG00000047613	RIKEN cDNA A430005L14 gene	uc008wau.3;uc012dqe.2	97159;97159	0;0	Unchanged	FGF_down	Unchanged
A430033K04Rik	28.8145771659547	-0.745006159032272	0.425416295599164	-1.75124029506907	0.0799045272137452	0.160497271205002	29884	chr5	138622875	138623721	847	*	6.51	6.31	6.68	0.37	0.216	0.569	91.16	67.69	104.6	101	Promoter (<=1kb)	5	138622859	138640823	17965	1	243308	uc009aft.2	16	ENSMUSG00000056014	RIKEN cDNA A430033K04 gene	uc009afq.1;uc009afr.1;uc009afs.1;uc009aft.2;uc009afu.3	24135;24135;24135;243308;243308	0;0;0;0;0	Unchanged	Unchanged	Unchanged
A430046D13Rik	20.9134936540678	-1.6085238426203	0.454764626614586	-3.53704696558014	0.000404627705963651	0.00185718523105897	4389	chr10	128498946	128500188	1243	*	7.38	7.59	7.13	-0.46	0.0741	0.312	221.92	163.8	124.57	156	Promoter (<=1kb)	10	128499247	128504242	4996	1	654440	uc007hnf.1	0	ENSMUSG00000097353	Riken cDNA A430046D13 gene	uc007hne.1;uc007hnf.1;uc056yja.1	216459;654440;654440	0;0;0	Unchanged	FGF_down	Unchanged
A4galt	198.119239586317	-1.29253504893351	0.223282162226389	-5.78879672270009	7.08924278930317e-09	9.63943456402179e-08	13720	chr15	83250839	83252651	1813	*	6.66	6.66	6.65	-0.01	0.985	0.997	122.47	80.23	108.41	93	Promoter (<=1kb)	15	83226722	83251731	25010	2	239559	uc007xaf.2	0	ENSMUSG00000047878	alpha 1,4-galactosyltransferase	uc007xaf.2;uc007xae.2	239559;239559	0;0	Unchanged	FGF_down	Unchanged
A530046M15Rik	59.0922198020604	3.26321501204759	0.534904366759982	6.10055780963896	1.05698944744701e-09	1.62588647051309e-08	9304	chr13	15802814	15809181	6368	*	8.24	7.49	8.73	1.25	1.06e-07	9.1e-06	162.06	196.39	502.1	348	Promoter (<=1kb)	13	15807243	15827537	20295	1	328190	uc007pnt.1	0	ENSMUSG00000113338	RIKEN cDNA A530046M15 gene	uc007pnu.1;uc007pnt.1;uc029rza.1	100503142;328190;71071	0;0;-184	FGF_up	FGF_up	FGF_up
A530072M11Rik	5.6868029793679	-0.0900364039836006	0.811803269534714	-0.110909141860447	0.911688396174437	0.946616254980181	25192	chr4	16164091	16164775	685	*	6.1	6.08	6.12	0.04	0.907	0.977	75.51	60.17	73.22	66	Promoter (<=1kb)	4	16164110	16193167	29058	1	100415915	uc008sbs.2	0	ENSMUSG00000085112	RIKEN cDNA gene A530072M11	uc008sbs.2;uc008sbt.2;uc008sbr.1;uc012das.1	100415915;100415915;192656;192656	0;0;0;0	Unchanged	Unchanged	Unchanged
A630001G21Rik	57.6659666260379	-0.14036951324042	0.278040929922477	-0.50485197729542	0.613662805644492	0.733669886272179	767	chr1	85735240	85736632	1393	*	7.23	7.14	7.31	0.16	0.511	0.829	154.7	127.86	149.3	167	Promoter (<=1kb)	1	85717083	85736606	19524	2	319997	uc007bui.2	0	ENSMUSG00000052760	RIKEN cDNA A630001G21 gene	uc007bui.2;uc007buj.2;uc011wod.1	319997;319997;319997	0;0;0	Unchanged	Unchanged	Unchanged
A630089N07Rik	46.3178208336412	-0.268365876164574	0.339392025315299	-0.79072534457832	0.429104282992594	0.574803275812051	15598	chr16	98080796	98083069	2274	*	7.22	7.35	7.08	-0.27	0.28	0.645	176.8	149.59	135.03	136	Promoter (<=1kb)	16	98001310	98081992	80683	2	320586	uc008aea.1	0	ENSMUSG00000116673	RIKEN cDNA A630089N07 gene	uc008aea.1;uc008aeb.1;uc012ajd.1;uc008aec.2	320586;320586;320586;320586	0;0;0;0	Unchanged	Unchanged	Unchanged
A830010M20Rik	24.8810601601686	-1.36905758166383	0.417551599325	-3.27877460863999	0.00104258870757854	0.00426017785742863	28822	chr5	107492164	107492386	223	*	3.48	3.03	3.82	0.78	0.336	0.701	5.52	10.86	16.17	12	Distal Intergenic	5	107497745	107512556	14812	1	231570	uc008ymg.2	-5359	ENSMUSG00000111375	RIKEN cDNA A830010M20 gene	uc029vkf.1	100503185	0	Unchanged	FGF_down	Unchanged
A830052D11Rik	2.41372460442078	0.00259304040378699	1.25306695678821	0.00206935502507649	0.998348894753074	0.999147899808989	17675	chr18	32377272	32378915	1644	*	7.36	7.39	7.33	-0.06	0.802	0.948	184.16	151.26	174.97	146	Promoter (<=1kb)	18	32359057	32378284	19228	2	402767	uc008ejg.1	0	ENSMUSG00000097413	RIKEN cDNA A830052D11 gene	uc008ejh.1;uc008eji.1;uc008ejj.1;uc008ejg.1	30948;30948;30948;402767	0;0;0;0	Unchanged	Unchanged	Unchanged
A830082K12Rik	7.52030609219867	-1.13818393716739	0.736696292443105	-1.54498393550051	0.12235014913408	0.225112220204822	10352	chr13	78202648	78205091	2444	*	7.34	7.51	7.14	-0.36	0.173	0.508	216.39	147.08	126.47	156	Exon (uc007rhg.1/uc007rhg.1, exon 1 of 2)	13	78198017	78236564	38548	1	320174	uc029sch.1	4631	NA	RIKEN cDNA A830082K12 gene	uc007rhe.2;uc029sch.1	13865;320174	0;0	Unchanged	Unchanged	Unchanged
A930005H10Rik	24.6396678990662	-0.142386427857946	0.46917889510566	-0.303480035746026	0.761524059688093	0.84884324070819	24547	chr3	115886991	115889223	2233	*	8.07	8.08	8.06	-0.02	0.922	0.981	289.14	252.38	257.7	276	Promoter (<=1kb)	3	115881578	115888059	6482	2	68161	uc008rbp.3	0	ENSMUSG00000054426	RIKEN cDNA A930005H10 gene	uc008rbp.3;uc012cwo.2;uc008rbq.3;uc012cwp.1;uc008rbr.1;uc008rbs.1	68161;68161;68161;68161;69740;69740	0;0;0;0;0;0	Unchanged	Unchanged	Unchanged
A930006K02Rik	2.13404310087869	0.456582977314343	1.38167298268987	0.33045661530231	0.74105496898339	0.833547544894624	15424	chr16	91465068	91465633	566	*	4.98	4.77	5.16	0.38	0.427	0.774	31.31	23.4	30.43	41	Promoter (<=1kb)	16	91465104	91470123	5020	1	100503120	uc007zxm.2	0	ENSMUSG00000084866	RIKEN cDNA A930006K02 gene	uc007zxm.2	100503120	0	Unchanged	Unchanged	Unchanged
A930015D03Rik	51.7067946091641	1.12834206529206	0.331357424024644	3.40521136236303	0.00066112861939115	0.00285883113565956	16539	chr17	35993947	35995652	1706	*	6.59	6.29	6.83	0.54	0.0654	0.289	88.4	68.53	110.31	118	Promoter (<=1kb)	17	35994504	36038174	43671	1	77810	uc008cjp.2	0	NA	RIKEN cDNA A930015D03 gene	uc008cjo.1;uc008cjp.2	14670;77810	0;0	Unchanged	FGF_up	Unchanged
A930024E05Rik	19.8488031370218	-1.54619184846428	0.473050508015835	-3.26855551841523	0.00108097967827706	0.00439600854534446	29323	chr5	122985466	122991503	6038	*	8.99	9.39	8.43	-0.96	1.06e-05	0.000411	790.06	549.06	310.01	378	Promoter (<=1kb)	5	122989354	122998345	8992	1	109202	uc008zmw.3	0	ENSMUSG00000056735	RIKEN cDNA A930024E05 gene	uc008zmw.3;uc008zms.4;uc008zmu.2;uc057abp.1;uc008zmv.2	109202;30841;30841;30841;30841	0;0;0;0;0	Unchanged	FGF_down	FGF_down
AA388235	2.79623369528088	-1.17317106453495	1.18412726149007	-0.990747449778896	0.321808915165752	0.468656044116128	16407	chr17	33981481	33981808	328	*	4.36	4.62	4.05	-0.57	0.33	0.696	25.78	23.4	18.07	15	Promoter (<=1kb)	17	33981492	33985358	3867	1	433100	uc008cao.1	0	NA	expressed sequence AA388235	uc008cao.1;uc012app.1	433100;630499	0;-2690	Unchanged	Unchanged	Unchanged
AA414768	90.4526149291462	0.0236190772940575	0.228980261489293	0.103148966380064	0.917844742700025	0.950709678137722	39938	chrX	12936536	12937441	906	*	5.58	5.52	5.64	0.12	0.77	0.94	54.33	37.61	39.94	60	Promoter (<=1kb)	20	12936873	12938541	1669	1	245350	uc033jol.1	0	ENSMUSG00000083307	expressed sequence AA414768	uc033jol.1	245350	0	Unchanged	Unchanged	Unchanged
AA465934	30.5331913568236	-0.0524718779858952	0.414845147439963	-0.126485456825764	0.899347660358551	0.938531671754597	6112	chr11	83291067	83292664	1598	*	6.48	6.67	6.25	-0.42	0.213	0.565	129.84	74.38	68.47	84	Promoter (<=1kb)	11	83291699	83294637	2939	1	613254	uc007kom.2	0	ENSMUSG00000093483	expressed sequence AA465934	uc011ybh.1;uc007kon.1;uc007koo.1;uc007kop.1;uc007koq.1;uc011ybg.1;uc057klt.1;uc007kom.2	103729;103737;103737;103737;103737;237890;237890;613254	-766;0;0;0;0;-4341;-4341;0	Unchanged	Unchanged	Unchanged
AA467197	132.432204498293	1.15756374875225	0.220314871844768	5.25413350020175	1.48722978948352e-07	1.56611193338388e-06	21860	chr2	122637894	122638287	394	*	4.04	4.12	3.96	-0.16	0.82	0.953	23.94	10.86	17.12	14	Promoter (<=1kb)	2	122637915	122641076	3162	1	433470	uc008maz.1	0	ENSMUSG00000033213	expressed sequence AA467197	uc012ccy.1;uc008may.1;uc008maz.1	387165;433470;433470	-2516;0;0	Unchanged	FGF_up	Unchanged
AA543186	2.67306695347797	-2.79682771905565	1.45955380237662	-1.91622104954371	0.0553369651522813	0.119356174665502	20288	chr2	25331689	25332583	895	*	6.87	6.9	6.83	-0.07	0.8	0.947	138.12	101.12	106.51	121	Promoter (<=1kb)	2	25327450	25332571	5122	2	100272219	uc008irn.1	0	ENSMUSG00000097345	expressed sequence AA543186	uc008irn.1;uc008iro.2;uc008irp.2	100272219;227619;227619	0;0;0	Unchanged	Unchanged	Unchanged
AA986860	8.08460677448189	-1.56962886223208	0.756983415279443	-2.07353137539037	0.0381228542823048	0.0884402861766512	1158	chr1	130740263	130741943	1681	*	6.86	6.85	6.88	0.03	0.905	0.977	138.12	91.93	112.21	123	Promoter (<=1kb)	1	130740272	130744622	4351	1	212439	uc007cmj.2	0	ENSMUSG00000042510	expressed sequence AA986860	uc007cmi.2;uc007cmj.2	212439;212439	0;0	Unchanged	Unchanged	Unchanged
Aaas	365.050330446476	-0.970074754508979	0.158964956303811	-6.10244406732634	1.04458670255322e-09	1.60887890063351e-08	14209	chr15	102349922	102351523	1602	*	7.49	7.42	7.57	0.15	0.534	0.843	197.98	143.74	190.19	189	Promoter (<=1kb)	15	102338247	102350759	12513	2	223921	uc007xvl.2	0	ENSMUSG00000036678	achalasia, adrenocortical insufficiency, alacrimia	uc007xvl.2	223921	0	Unchanged	FGF_down	Unchanged
Aacs	1408.92856887839	0.478828650258367	0.138596096583088	3.45484946591775	0.000550600145952413	0.00243642093462541	29500	chr5	125475836	125477118	1283	*	7.66	7.64	7.67	0.03	0.896	0.974	210.87	188.87	199.7	208	Promoter (<=1kb)	5	125475873	125517403	41531	1	78894	uc008zrs.1	0	ENSMUSG00000029482	acetoacetyl-CoA synthetase	uc008zrs.1	78894	0	Unchanged	FGF_up	Unchanged
Aaed1	59.3741884910204	-0.439414783904499	0.273361745744305	-1.60744797231254	0.107956133790434	0.204192389786876	10231	chr13	64311833	64312716	884	*	6.79	6.69	6.88	0.2	0.476	0.807	114.18	91.93	115.06	121	Promoter (<=1kb)	13	64291836	64312710	20875	2	66129	uc007qyt.1	0	ENSMUSG00000021482	AhpC/TSA antioxidant enzyme domain containing 1	uc007qyt.1;uc007qyu.1;uc007qyv.1	66129;66129;66129	0;0;0	Unchanged	Unchanged	Unchanged
Aak1	1337.39775347186	0.000604774509944605	0.118866166056553	0.00508786082708238	0.995940491912858	0.997527237802439	31506	chr6	86848499	86852896	4398	*	9.1	9.04	9.16	0.12	0.564	0.859	613.27	437.07	530.62	610	Promoter (<=1kb)	6	86849517	86951019	101503	1	269774	uc009csr.1	0	ENSMUSG00000057230	AP2 associated kinase 1	uc009csr.1;uc009css.1;uc009cst.1;uc009csu.1;uc009csq.2	269774;269774;269774;269774;67170	0;0;0;0;0	Unchanged	Unchanged	Unchanged
Aamp	1114.65339036249	0.461729765844069	0.121598333486539	3.79717182468773	0.000146356345287357	0.000767888954729803	605	chr1	74284296	74284710	415	*	6	5.95	6.05	0.11	0.756	0.936	67.22	55.99	66.57	66	Promoter (<=1kb)	1	74279840	74284738	4899	2	227290	uc007blr.2	28	ENSMUSG00000006299	angio-associated migratory protein	uc007blq.1;uc007blr.2;uc011wmz.1;uc007bls.2;uc007blt.1;uc007blu.1;uc007blv.2	227289;227290;227290;56695;56695;56695;69660	5696;0;0;0;0;0;0	Unchanged	FGF_up	Unchanged
Aar2	326.324334413787	0.427017519642839	0.151898711619493	2.81119908845916	0.00493572347462061	0.0161842982081387	22655	chr2	156546939	156548489	1551	*	6.74	6.77	6.7	-0.08	0.789	0.945	117.87	101.12	99.85	108	Promoter (<=1kb)	2	156547576	156568972	21397	1	68295	uc008nnp.2	0	ENSMUSG00000027628	AAR2 splicing factor homolog	uc008nni.2;uc008nnk.2;uc008nnl.2;uc008nnm.2;uc008nnn.2;uc008nno.2;uc008nnp.2;uc008nnq.2	13821;13821;13821;13821;13821;13821;68295;68295	0;0;0;0;0;0;0;0	Unchanged	FGF_up	Unchanged
Aars	3054.80264218752	0.0229920972753538	0.104151677049048	0.220755900690165	0.825282502566758	0.890999341796335	36977	chr8	111033196	111035701	2506	*	8.35	8.25	8.45	0.21	0.316	0.681	340.7	266.59	346.14	355	Promoter (<=1kb)	8	111033842	111055569	21728	1	234734	uc009nlo.2	0	ENSMUSG00000031960	alanyl-tRNA synthetase	uc009nln.2;uc009nlo.2	234733;234734	0;0	Unchanged	Unchanged	Unchanged
Aarsd1	170.659332598026	-0.705510880623229	0.190855425780401	-3.69657230198419	0.000218530042421015	0.00108964166333582	6751	chr11	101416671	101418282	1612	*	6.97	6.9	7.04	0.14	0.605	0.878	137.2	101.12	144.54	118	Promoter (<=1kb)	11	101406839	101417433	10595	2	69684	uc007los.2	0	ENSMUSG00000075528	alanyl-tRNA synthetase domain containing 1	uc033gag.1;uc007los.2;uc007lot.1;uc007lou.1;uc011yfl.1	102465560;69684;73635;73635;73635	971;0;0;0;0	Unchanged	FGF_down	Unchanged
Aasdh	117.281774500048	-0.809632746565705	0.210646966616841	-3.84355283899435	0.000121265875083308	0.000649650264005244	28559	chr5	76904585	76906853	2269	*	7.93	7.95	7.91	-0.04	0.882	0.97	292.82	201.41	234.88	247	Promoter (<=1kb)	5	76875935	76905514	29580	2	231326	uc008xvi.2	0	ENSMUSG00000055923	aminoadipate-semialdehyde dehydrogenase	uc012dxo.1;uc008xvi.2;uc012dxp.1;uc008xvj.2;uc008xvk.2	231326;231326;231326;231326;231326	-205;0;0;0;0	Unchanged	FGF_down	Unchanged
Aatf	396.414699891441	0.196017336120205	0.148772124338265	1.31756763568501	0.187648425705693	0.312320565942687	6137	chr11	84512347	84513554	1208	*	7.07	7.05	7.1	0.05	0.844	0.96	145.49	118.67	122.67	151	Promoter (<=1kb)	11	84422856	84513501	90646	2	56321	uc007kqm.1	0	ENSMUSG00000018697	apoptosis antagonizing transcription factor	uc007kqm.1;uc007kqn.1	56321;56321	0;0	Unchanged	Unchanged	Unchanged
Aatk	82.754428735913	-1.0245430617932	0.265501665235678	-3.8588950501826	0.000113900834392976	0.000614047258757263	7425	chr11	120046485	120047131	647	*	4.33	4.14	4.5	0.36	0.587	0.87	27.62	7.52	16.17	29	Promoter (<=1kb)	11	120007313	120047145	39833	2	11302	uc007mrm.4	14	ENSMUSG00000025375	apoptosis-associated tyrosine kinase	uc007mrl.4;uc007mrm.4;uc007mro.4;uc007mrn.3	11302;11302;11302;11302	-4704;0;0;0	Unchanged	FGF_down	Unchanged
Abca2	3010.31862766693	-0.905537193455171	0.180089484178605	-5.02826246399317	4.94944124439882e-07	4.6779766684102e-06	20296	chr2	25428182	25429364	1183	*	6.64	6.47	6.79	0.32	0.279	0.645	105.89	71.04	112.21	109	Promoter (<=1kb)	2	25428674	25448539	19866	1	11305	uc008isc.1	0	ENSMUSG00000026944	ATP-binding cassette, sub-family A (ABC1), member 2	uc008isc.1;uc008irz.4;uc012brx.3;uc033hlv.2;uc008isa.3;uc008isb.3;uc012bry.2;uc012brz.2;uc012bsa.2	11305;14347;14347;14347;14347;14347;14347;14347;14347	0;0;0;0;4488;4488;4488;4488;3618	Unchanged	FGF_down	Unchanged
Abca3	2965.12988579306	-0.574317963278704	0.145115686471348	-3.95765597258226	7.5688863670886e-05	0.00042530949628323	15931	chr17	24351433	24353449	2017	*	7.72	7.73	7.71	-0.03	0.926	0.982	256.91	167.98	182.58	235	Promoter (<=1kb)	17	24352023	24383344	31322	1	27410	uc008avl.2	0	ENSMUSG00000024130	ATP-binding cassette, sub-family A (ABC1), member 3	uc008avl.2;uc008avm.2;uc008avn.2;uc008avo.2;uc008avp.2;uc008avk.1;uc057kwo.1	27410;27410;27410;27410;27410;381072;381072	0;0;0;0;0;0;-404	Unchanged	FGF_down	Unchanged
Abca4	7.13339075334328	-0.381744434703586	0.780000241881608	-0.489415790157574	0.624547359326058	0.743336988514742	24610	chr3	122042396	122043932	1537	*	6.5	6.76	6.17	-0.6	0.0733	0.31	138.12	79.39	67.52	76	Promoter (<=1kb)	3	122044460	122180061	135602	1	11304	uc008rel.1	-528	ENSMUSG00000028125	ATP-binding cassette, sub-family A (ABC1), member 4	uc008rel.1	11304	0	Unchanged	Unchanged	Unchanged
Abcb10	481.289809844397	-0.421244886405512	0.167575956168905	-2.51375493260457	0.0119453408701456	0.0340416581020458	37392	chr8	123983051	123984016	966	*	6.3	6.33	6.28	-0.05	0.881	0.97	93.92	66.86	73.22	82	Promoter (<=1kb)	8	123952459	123983122	30664	2	56199	uc009nwv.1	0	ENSMUSG00000031974	ATP-binding cassette, sub-family B (MDR/TAP), member 10	uc009nwv.1	56199	0	Unchanged	FGF_down	Unchanged
Abcb1b	1111.3732515559	0.456324326509208	0.151763400310444	3.0068140643644	0.00264001186950168	0.0094495643705709	27655	chr5	8797840	8799223	1384	*	7.4	7.27	7.52	0.25	0.332	0.697	183.24	125.36	176.87	189	Promoter (<=1kb)	5	8798147	8849821	51675	1	18669	uc008wko.2	0	ENSMUSG00000028970	ATP-binding cassette, sub-family B (MDR/TAP), member 1B	uc008wko.2;uc008wkp.2;uc008wkn.1	18669;18669;330031	0;0;0	Unchanged	FGF_up	Unchanged
Abcb6	1506.90598974015	-0.594932751715553	0.13884698043056	-4.28480871438965	1.82896481770326e-05	0.000119911066929179	638	chr1	75179501	75180364	864	*	5.82	5.87	5.77	-0.1	0.821	0.954	81.03	35.94	55.15	54	Promoter (<=1kb)	1	75171640	75180392	8753	2	74104	uc007bnx.3	28	ENSMUSG00000026198	ATP-binding cassette, sub-family B (MDR/TAP), member 6	uc007boa.2;uc007bob.2;uc011wnh.2;uc033fjn.1;uc007bnz.1;uc007bnx.3;uc007bny.2	245860;245860;245860;245860;245860;74104;74104	0;0;0;0;9263;0;0	Unchanged	FGF_down	Unchanged
Abcb7	479.086140294349	-0.416704134016959	0.164155898933644	-2.5384657921151	0.0111339686985321	0.0321977241434445	40450	chrX	104412695	104414550	1856	*	7.14	7.13	7.14	0.01	0.978	0.995	161.14	119.51	142.64	139	Promoter (<=1kb)	20	104280565	104413846	133282	2	11306	uc009uaf.2	0	ENSMUSG00000031333	ATP-binding cassette, sub-family B (MDR/TAP), member 7	uc009uaf.2;uc009uag.2	11306;11306	0;0	Unchanged	FGF_down	Unchanged
Abcb8	735.617457851018	-0.490293436949624	0.151939256754486	-3.22690427360635	0.00125137317323222	0.00499546164544805	27816	chr5	24393643	24394680	1038	*	7.25	7	7.45	0.45	0.0648	0.287	139.96	116.16	178.78	172	Promoter (<=1kb)	5	24394156	24403977	9822	1	74610	uc008wrg.1	0	ENSMUSG00000028973	ATP-binding cassette, sub-family B (MDR/TAP), member 8	uc033ihy.1;uc008wrg.1;uc008wrh.1	213948;74610;74610	-1500;0;0	Unchanged	FGF_down	Unchanged
Abcc1	4936.59534632068	0.22243497061451	0.150283000042217	1.48010733450905	0.138844604516074	0.248758913682524	14504	chr16	14360618	14362824	2207	*	8.45	8.48	8.42	-0.06	0.786	0.945	430.94	284.14	339.49	345	Promoter (<=1kb)	16	14361558	14474878	113321	1	17250	uc007yhj.2	0	ENSMUSG00000023088	ATP-binding cassette, sub-family C (CFTR/MRP), member 1	uc007yhj.2	17250	0	Unchanged	Unchanged	Unchanged
Abcc4	848.770505160663	0.0952154962724541	0.122922710761682	0.774596457257229	0.438578151382236	0.584112636948228	12256	chr14	118705588	118706628	1041	*	5.97	5.98	5.96	-0.02	0.961	0.991	81.95	44.29	51.35	73	Promoter (<=1kb)	14	118482692	118706219	223528	2	239273	uc007uyv.2	0	ENSMUSG00000032849	ATP-binding cassette, sub-family C (CFTR/MRP), member 4	uc007uyv.2;uc011zqa.1	239273;239273	0;0	Unchanged	Unchanged	Unchanged
Abcc5	1243.42270265121	-0.953312149177981	0.121043678347298	-7.87576982287947	3.3865118812332e-15	1.12120747934901e-13	14625	chr16	20425414	20427137	1724	*	6.66	6.75	6.58	-0.17	0.575	0.864	127.99	86.91	98.9	92	Promoter (<=1kb)	16	20331303	20426394	95092	2	27416	uc007ypp.2	0	ENSMUSG00000022822	ATP-binding cassette, sub-family C (CFTR/MRP), member 5	uc007ypp.2;uc007ypq.1;uc007ypr.1;uc007yps.1;uc007ypt.1	27416;27416;27416;27416;27416	0;0;0;0;0	Unchanged	FGF_down	Unchanged
Abcd1	59.5425639642667	-1.57277393349356	0.355787764807732	-4.42053968422295	9.84547021152637e-06	6.84145697489321e-05	40205	chrX	73716690	73717580	891	*	5.67	5.73	5.61	-0.12	0.752	0.934	58.01	48.47	42.79	55	Promoter (<=1kb)	20	73716597	73731432	14836	1	11666	uc009tmk.1	93	ENSMUSG00000031378	ATP-binding cassette, sub-family D (ALD), member 1	uc009tmk.1;uc009tml.2;uc009tmj.2;uc057cff.1	11666;11666;27061;27061	0;0;0;0	Unchanged	FGF_down	Unchanged
Abcd3	6.74327716085605	-0.926828936355413	0.768986403433217	-1.20526049903807	0.228102753581278	0.362345043966433	24605	chr3	121813919	121816274	2356	*	8	7.85	8.13	0.28	0.233	0.589	269.8	193.05	253.9	307	Promoter (<=1kb)	3	121758910	121815215	56306	2	19299	uc008reg.1	0	ENSMUSG00000028127	ATP-binding cassette, sub-family D (ALD), member 3	uc008reg.1	19299	0	Unchanged	Unchanged	Unchanged
Abcd4	139.734400596481	-0.907276696910714	0.243538458183258	-3.72539394261914	0.000195010431977993	0.000985107642857552	8636	chr12	84616952	84617399	448	*	4.94	4.86	5.02	0.16	0.748	0.932	29.47	28.41	24.72	40	Promoter (<=1kb)	12	84602531	84617413	14883	2	19300	uc007ofp.2	14	ENSMUSG00000021240	ATP-binding cassette, sub-family D (ALD), member 4	uc007ofp.2;uc007ofo.2;uc011yoz.1	19300;19300;19300	0;0;0	Unchanged	FGF_down	Unchanged
Abcf1	1492.84994154819	0.446742913423966	0.111352222275401	4.01198022181418	6.02115456731455e-05	0.000347824259973627	16536	chr17	35968937	35969803	867	*	6.73	6.9	6.54	-0.36	0.261	0.623	147.33	91.09	77.03	109	Promoter (<=1kb)	17	35956819	35969750	12932	2	224742	uc008cjk.1	0	ENSMUSG00000038762	ATP-binding cassette, sub-family F (GCN20), member 1	uc008cjk.1;uc008cjl.2;uc008cjm.2;uc033hdn.1;uc012asa.1	224742;75210;75210;75210;75210	0;0;0;0;0	Unchanged	FGF_up	Unchanged
Abcf3	494.406061513627	0.275904269544501	0.152841521610193	1.8051656816671	0.0710487594402691	0.145981566585886	14639	chr16	20548672	20549220	549	*	5.18	5.07	5.29	0.21	0.639	0.891	41.44	25.91	38.99	39	Promoter (<=1kb)	16	20548603	20561603	13001	1	27406	uc007ypz.1	69	ENSMUSG00000003234	ATP-binding cassette, sub-family F (GCN20), member 3	uc012act.1;uc007ypy.2;uc033gyi.3;uc007ypz.1;uc007yqa.1	100042948;11773;11773;27406;27406	0;0;0;0;-2424	Unchanged	Unchanged	Unchanged
Abcg4	171.16388734887	-1.60054412708705	0.246151227311072	-6.50227969436192	7.91118316159233e-11	1.42187159620077e-09	38097	chr9	44287574	44289196	1623	*	6.12	6.36	5.83	-0.53	0.165	0.496	109.58	55.16	56.11	58	Promoter (<=1kb)	9	44273190	44288244	15055	2	192663	uc009pcq.1	0	ENSMUSG00000032131	ATP binding cassette subfamily G member 4	uc009pcp.1;uc009pcq.1	192663;192663	-38;0	Unchanged	FGF_down	Unchanged
Abhd1	353.807605284352	1.47253520841338	0.173287060915612	8.49766393770436	1.93444191898291e-17	8.28689957551388e-16	27946	chr5	30948646	30951220	2575	*	7.76	7.38	8.06	0.68	0.006	0.057	202.58	130.37	274.82	258	Promoter (<=1kb)	5	30950066	30955095	5030	1	57742	uc057llu.1	0	ENSMUSG00000006638	abhydrolase domain containing 1	uc008wwr.3;uc012dui.2;uc057llu.1;uc057llv.1;uc012duh.1;uc008wwo.1	50907;50907;57742;57742;68567;68567	0;0;0;0;-3219;-3166	Unchanged	FGF_up	Unchanged
Abhd10	168.906043819035	0.207064872415356	0.186373986977973	1.11101809739053	0.266560559576511	0.407668817409911	15169	chr16	45742176	45744352	2177	*	7.69	7.55	7.81	0.25	0.248	0.607	187.85	188.03	231.08	217	Promoter (<=1kb)	16	45729725	45742955	13231	2	213012	uc007zix.3	0	ENSMUSG00000033157	abhydrolase domain containing 10	uc012agi.3;uc007zjb.4;uc012agj.3;uc007zix.3;uc007ziy.3;uc007ziz.2	208177;208177;208177;213012;213012;213012	0;0;0;0;0;0	Unchanged	Unchanged	Unchanged
Abhd11	467.535721501415	-0.398674103767686	0.140210773169298	-2.84339137967883	0.00446362210330034	0.0148605045622968	29651	chr5	135009092	135010791	1700	*	8.8	8.87	8.74	-0.13	0.509	0.828	510.14	423.7	411.76	443	Promoter (<=1kb)	5	135009152	135012175	3024	1	68758	uc012eeh.1	0	ENSMUSG00000040532	abhydrolase domain containing 11	uc012eeh.1;uc008zxg.2;uc008zxh.2;uc008zxi.1;uc012eei.1;uc008zxj.2	68758;68758;68758;68758;69812;69812	0;0;0;0;0;0	Unchanged	FGF_down	Unchanged
Abhd11os	3.90934606787817	0.0514152128979785	0.979537008593939	0.0524893010135285	0.958138820138526	0.976522143625451	29652	chr5	135012887	135013302	416	*	4.21	4.2	4.22	0.02	0.977	0.995	16.57	20.06	16.17	21	Promoter (<=1kb)	5	135012122	135013157	1036	2	69812	uc012eei.1	0	ENSMUSG00000085042	abhydrolase domain containing 11, opposite strand	uc012eeh.1;uc008zxg.2;uc008zxh.2;uc008zxi.1;uc012eei.1;uc008zxj.2	68758;68758;68758;68758;69812;69812	0;0;0;0;0;0	Unchanged	Unchanged	Unchanged
Abhd13	637.607438409957	0.434738867060529	0.167978407624543	2.5880639851774	0.00965170504057947	0.0285325695387103	35441	chr8	9976729	9978809	2081	*	7.74	7.74	7.74	-0.01	0.975	0.995	245.86	183.02	207.3	219	Promoter (<=1kb)	8	9977717	9992155	14439	1	68904	uc009kum.2	0	ENSMUSG00000040396	abhydrolase domain containing 13	uc009kul.1;uc009kum.2;uc012fzf.2	319583;68904;68904	0;0;0	Unchanged	FGF_up	Unchanged
Abhd14a	14.131646314467	-0.537853407994398	0.533556906263203	-1.00805256511679	0.313429227964993	0.459644924250012	39400	chr9	106446989	106449331	2343	*	7.38	7.44	7.33	-0.11	0.661	0.904	191.53	154.61	150.25	171	Promoter (<=1kb)	9	106440051	106447678	7628	2	68644	uc009rjq.2	0	ENSMUSG00000042210	abhydrolase domain containing 14A	uc009rjt.4;uc009rjq.2;uc009rjr.2;uc012gzu.1;uc009rjs.2	59092;68644;68644;68644;76491	0;0;0;0;0	Unchanged	Unchanged	Unchanged
Abhd14b	104.277993585237	-0.378761041451021	0.244067730069929	-1.55186857903132	0.120693672517424	0.222887944055662	39401	chr9	106452877	106453718	842	*	6.53	6.33	6.71	0.38	0.205	0.555	86.56	74.38	94.14	115	3' UTR	9	106448640	106452918	4279	1	76491	uc009rjs.2	4237	ENSMUSG00000042073	abhydrolase domain containing 14b	uc009rjt.4;uc009rjs.2	59092;76491	0;0	Unchanged	Unchanged	Unchanged
Abhd15	6.16781067360946	-0.631147221216669	0.849150556645721	-0.743268924782667	0.457318881489432	0.60110802502603	5932	chr11	77513460	77515034	1575	*	7.23	7.35	7.1	-0.25	0.344	0.707	194.29	132.04	126.47	147	Promoter (<=1kb)	11	77515117	77520628	5512	1	67477	uc007kha.1	-83	ENSMUSG00000000686	abhydrolase domain containing 15	uc007kgz.1;uc007kha.1	216964;67477	0;-83	Unchanged	Unchanged	Unchanged
Abhd16a	539.196029025856	-0.195892505017519	0.138103224902647	-1.41844989612379	0.156059456946971	0.272136362624774	16478	chr17	35088774	35090529	1756	*	6.96	7.01	6.91	-0.1	0.695	0.916	139.96	117.83	119.82	120	Promoter (<=1kb)	17	35089291	35102987	13697	1	193742	uc008cfq.1	0	ENSMUSG00000007036	abhydrolase domain containing 16A	uc057kxl.1;uc057kxm.1;uc008cfq.1;uc012aqz.2;uc057kxn.1;uc057kxo.1	114654;114654;193742;433099;433099;433099	-3179;-3179;0;-3179;-3179;-3179	Unchanged	Unchanged	Unchanged
Abhd17a	399.579475317966	0.281163821539803	0.20992006683782	1.33938515633679	0.180445319174694	0.303160311326391	3500	chr10	80589502	80590302	801	*	6.06	5.84	6.26	0.43	0.235	0.591	69.98	44.29	67.52	86	Promoter (<=1kb)	10	80583649	80590341	6693	2	216169	uc007gdv.2	39	ENSMUSG00000003346	abhydrolase domain containing 17A	uc007gdv.2;uc007gdw.2	216169;216169	0;0	Unchanged	Unchanged	Unchanged
Abhd17b	403.286013302272	0.291545596353671	0.178885788879446	1.62978623500466	0.103146684011241	0.196808615469724	19195	chr19	21651143	21655108	3966	*	8.86	8.93	8.79	-0.14	0.493	0.819	557.1	418.69	426.02	460	Promoter (<=1kb)	19	21653309	21678782	25474	1	226016	uc008gza.1	0	ENSMUSG00000047368	abhydrolase domain containing 17B	uc008gza.1;uc008gzb.1;uc012bjk.1;uc008gyz.1	226016;226016;226016;66206	0;0;0;0	Unchanged	Unchanged	Unchanged
Abhd17c	420.426853682882	0.0453416397906287	0.162253130048112	0.279450016016232	0.779899491991873	0.861095494529965	34064	chr7	84150727	84152165	1439	*	7.04	7.01	7.07	0.05	0.841	0.96	154.7	103.63	137.89	130	Promoter (<=1kb)	7	84109356	84151893	42538	2	70178	uc009ied.2	0	ENSMUSG00000038459	abhydrolase domain containing 17C	uc009ied.2	70178	0	Unchanged	Unchanged	Unchanged
Abhd18	18.8041975320214	-0.0814626597926084	0.640710050119283	-0.127144345211133	0.898826153841838	0.938069349521276	23426	chr3	40894371	40894673	303	*	3.64	3.73	3.53	-0.2	0.805	0.949	16.57	10.03	16.17	7	Promoter (<=1kb)	3	40894277	40917067	22791	1	269423	uc008pbt.1	94	ENSMUSG00000037818	abhydrolase domain containing 18	uc008pbt.1;uc008pbu.1;uc008pbw.2;uc033htf.1	269423;269423;269423;269423	0;0;0;0	Unchanged	Unchanged	Unchanged
Abhd2	12402.4084449931	1.93222819546355	0.583360768375385	3.31223541282122	0.000925536278711476	0.00383964234750418	33910	chr7	79273218	79275690	2473	*	7.31	7.26	7.35	0.09	0.718	0.924	170.35	137.06	164.51	162	Promoter (<=1kb)	7	79273266	79345371	72106	1	54608	uc012fnf.1	0	ENSMUSG00000039202	abhydrolase domain containing 2	uc012fnf.1;uc009hyc.1	54608;54608	0;0	Unchanged	FGF_up	Unchanged
Abhd3	206.295845519545	-0.707580657377843	0.177620087197148	-3.98367475516701	6.78577294073379e-05	0.00038547318530252	17490	chr18	10706256	10707320	1065	*	5.3	5.44	5.13	-0.31	0.475	0.807	45.12	41.79	34.23	36	Promoter (<=1kb)	18	10644411	10706696	62286	2	106861	uc008eba.1	0	ENSMUSG00000002475	abhydrolase domain containing 3	uc008eba.1;uc029tlr.1	106861;75370	0;0	Unchanged	FGF_down	Unchanged
Abhd4	407.908638041874	-0.387904332705863	0.181559822848819	-2.13650975540367	0.0326378866766907	0.0780488238414981	11651	chr14	54254204	54254555	352	*	4.32	4.32	4.31	-0.01	0.983	0.997	17.5	22.56	25.68	14	Promoter (<=1kb)	14	54254129	54269169	15041	1	105501	uc007tvo.2	75	ENSMUSG00000040997	abhydrolase domain containing 4	uc007tvo.2;uc007tvp.2;uc007tvq.2;uc007tvm.2;uc007tvn.2	105501;105501;105501;13135;13135	0;0;0;0;0	Unchanged	Unchanged	Unchanged
Abhd8	479.199869749069	-0.727180024008253	0.158023042586176	-4.60173410223825	4.18987877720662e-06	3.19983585592163e-05	36237	chr8	71462803	71464577	1775	*	7.13	7.42	6.77	-0.65	0.0363	0.199	219.16	124.52	86.54	132	Promoter (<=1kb)	8	71456700	71463657	6958	2	64296	uc009mdf.2	0	ENSMUSG00000007950	abhydrolase domain containing 8	uc009mdf.2;uc009mdg.2;uc009mdi.3;uc009mdk.3;uc057aly.1;uc057alz.2;uc057ama.1;uc009mdh.1	64296;64296;66498;66498;66498;66498;66498;94065	0;0;0;0;0;0;0;0	Unchanged	FGF_down	Unchanged
Abi2	1040.1373315644	1.23390147821648	0.121948429033677	10.1182236457981	4.58664109787859e-24	3.63043274184403e-22	430	chr1	60408658	60410637	1980	*	7.75	7.41	8.02	0.62	0.00462	0.0471	171.27	167.98	257.7	262	Promoter (<=1kb)	1	60409619	60481163	71545	1	329165	uc007bep.2	0	ENSMUSG00000026782	abl-interactor 2	uc007bep.2;uc007beq.2;uc007ber.2	329165;329165;329165	0;0;0	Unchanged	FGF_up	FGF_up
Abi3	87.7123517055535	-0.456842495591335	0.253251758059213	-1.80390651220877	0.0712459639195634	0.146286164021065	6454	chr11	95836337	95837589	1253	*	5.31	5.72	4.75	-0.97	0.0475	0.235	72.74	32.59	23.77	30	5' UTR	11	95830072	95842439	12368	2	66610	uc007lat.2	4850	ENSMUSG00000018381	ABI gene family, member 3	uc007lau.1;uc033fzh.1;uc007lap.1;uc007las.2;uc007lat.2;uc011ydb.1	14710;14710;237928;237928;66610;66610	0;0;0;0;0;0	Unchanged	Unchanged	Unchanged
Abl1	1085.33195964122	-0.302882445428063	0.122671250372441	-2.46905810863168	0.0135469218173845	0.0378035978429558	20606	chr2	31758995	31761595	2601	*	8.12	8.13	8.11	-0.02	0.93	0.983	298.35	260.74	273.87	278	Promoter (<=1kb)	2	31759939	31804362	44424	1	11350	uc008jec.3	0	ENSMUSG00000026842	c-abl oncogene 1, non-receptor tyrosine kinase	uc008jdz.3;uc008jea.3;uc008jeb.3;uc033hmk.1;uc008jec.3;uc033hml.1	11350;11350;11350;11350;11350;11350	0;0;0;0;0;0	Unchanged	FGF_down	Unchanged
Abl2	1882.82717399502	0.912147057525305	0.162133350598367	5.62590641690282	1.84536376043802e-08	2.29270142045273e-07	1578	chr1	156557928	156559945	2018	*	8.29	8.1	8.46	0.36	0.112	0.4	330.57	217.28	341.39	364	Promoter (<=1kb)	1	156558787	156649619	90833	1	11352	uc007dcl.2	0	ENSMUSG00000026596	v-abl Abelson murine leukemia viral oncogene 2 (arg, Abelson-related gene)	uc007dcl.2;uc011wuf.1;uc011wug.1	11352;11352;11352	0;0;0	Unchanged	FGF_up	Unchanged
Ablim1	41.1008455490253	-0.8443370711082	0.348972795101669	-2.4194925305344	0.0155421799277655	0.0424594593135206	19936	chr19	57197040	57200881	3842	*	8.22	8.2	8.24	0.04	0.848	0.962	351.75	234.83	308.1	296	Promoter (<=1kb)	19	57033264	57197631	164368	2	226251	uc033hla.2	0	ENSMUSG00000025085	actin-binding LIM protein 1	uc033hla.2;uc033hle.2;uc056ziu.1;uc033hlc.1;uc057lbe.1;uc008hzv.1;uc008hzz.1	226251;226251;226251;226251;226251;226251;226251	0;0;0;0;0;0;0	Unchanged	FGF_down	Unchanged
Abr	49.4591820760113	-0.24210635517316	0.36697534177757	-0.659734667731176	0.509424115292494	0.647451831771149	5899	chr11	76569642	76572017	2376	*	7.15	6.92	7.36	0.44	0.131	0.439	151.01	91.09	139.79	188	Promoter (<=1kb)	11	76416732	76571384	154653	2	109934	uc007kft.2	0	ENSMUSG00000017631	active BCR-related gene	uc007kft.2;uc007kfu.2	109934;109934	0;0	Unchanged	Unchanged	Unchanged
Abracl	441.417056771449	0.76384445469058	0.199717673771326	3.82462122788978	0.0001309732887359	0.000695421033750098	2522	chr10	18021688	18023543	1856	*	7.62	7.51	7.72	0.21	0.363	0.723	197.98	166.31	199.7	221	Promoter (<=1kb)	10	18011260	18023252	11993	2	73112	uc007ely.2	0	ENSMUSG00000078453	ABRA C-terminal like	uc007ely.2;uc007elz.2	73112;73112	0;0	Unchanged	FGF_up	Unchanged
Abt1	229.948505382066	0.604053685724095	0.217180953118145	2.78133822073934	0.00541353048589806	0.0174777191700307	9414	chr13	23423275	23423891	617	*	6.05	6.11	5.99	-0.13	0.738	0.93	88.4	50.14	60.86	66	Promoter (<=1kb)	13	23418361	23423866	5506	2	30946	uc007pto.1	0	ENSMUSG00000036376	activator of basal transcription 1	uc007pto.1;uc007ptp.1;uc057kps.1;uc057kpt.1	30946;320842;320842;320842	0;0;0;0	Unchanged	FGF_up	Unchanged
Abtb1	39.826326032227	-0.386625221369369	0.352130327446416	-1.09796058798202	0.272221699417648	0.414050638895047	31566	chr6	88841154	88842104	951	*	5.62	5.56	5.68	0.11	0.797	0.947	56.17	38.44	34.23	68	Promoter (<=1kb)	6	88835914	88841935	6022	2	80283	uc009cvs.2	0	ENSMUSG00000030083	ankyrin repeat and BTB (POZ) domain containing 1	uc029vxo.1;uc009cvu.2;uc057lqu.1;uc009cvs.2;uc009cvt.2	100038356;319655;319655;80283;80283	0;0;0;0;0	Unchanged	Unchanged	Unchanged
Abtb2	458.472978666975	1.71104714435142	0.173940309367116	9.83697884968177	7.80184941931241e-23	5.42137815462918e-21	21520	chr2	103566337	103567536	1200	*	5.93	5.46	6.28	0.82	0.0324	0.184	57.09	30.92	72.27	83	Promoter (<=1kb)	2	103566310	103718423	152114	1	99382	uc008lix.1	27	ENSMUSG00000032724	ankyrin repeat and BTB (POZ) domain containing 2	uc008lix.1	99382	0	Unchanged	FGF_up	Unchanged
Acaa1a	2.16563208696168	-2.01286191180056	1.46778073916344	-1.37136416774878	0.170261461680399	0.290176121014778	39709	chr9	119339546	119342202	2657	*	7.67	7.74	7.59	-0.15	0.511	0.829	241.26	187.2	191.14	194	Promoter (<=1kb)	9	119341294	119350295	9002	1	113868	uc009sas.1	0	ENSMUSG00000036138	acetyl-Coenzyme A acyltransferase 1A	uc009sas.1;uc009sar.1;uc057mav.1;uc057maw.1	113868;17874;17874;17874	0;0;0;0	Unchanged	Unchanged	Unchanged
Acaa2	319.097540986141	-0.226255234819903	0.211506089474738	-1.06973390402987	0.284739100847059	0.428129542498936	18419	chr18	74783372	74783768	397	*	3.21	3.41	2.98	-0.43	0.627	0.887	12.89	8.36	4.75	11	Intron (uc008fpt.1/52538, intron 1 of 9)	18	74779212	74806207	26996	1	52538	uc008fpt.1	4160	ENSMUSG00000036880	acetyl-Coenzyme A acyltransferase 2 (mitochondrial 3-oxoacyl-Coenzyme A thiolase)	uc012bey.1;uc008fpt.1	100217466;52538	0;0	Unchanged	Unchanged	Unchanged
Acaca	1086.63065404996	-0.141194722088061	0.176540433165446	-0.799786879166311	0.423834286303277	0.569816354319096	6131	chr11	84128672	84130000	1329	*	6.62	6.67	6.56	-0.11	0.702	0.918	116.94	86.91	92.24	96	Promoter (<=1kb)	11	84129672	84214290	84619	1	107476	uc007kqg.1	0	ENSMUSG00000020532	acetyl-Coenzyme A carboxylase alpha	uc007kqg.1;uc007kqf.1	107476;217031	0;0	Unchanged	Unchanged	Unchanged
Acacb	290.100992125832	-1.43104158914007	0.193448197193297	-7.39754419996038	1.38726066703899e-13	3.7092929513311e-12	28963	chr5	114161586	114163314	1729	*	6.48	6.67	6.26	-0.42	0.167	0.5	106.82	96.94	81.78	71	Promoter (2-3kb)	5	114165518	114250758	85241	1	100705	uc008yzi.2	-2204	ENSMUSG00000042010	acetyl-Coenzyme A carboxylase beta	uc008yzi.2	100705	0	Unchanged	FGF_down	Unchanged
Acad10	187.722521960387	-0.213578908728393	0.177111335498466	-1.20590197192795	0.22785529022389	0.362048182498795	29242	chr5	121659850	121661551	1702	*	7.41	7.18	7.61	0.43	0.0784	0.323	158.38	132.04	175.92	215	Promoter (<=1kb)	5	121621029	121660510	39482	2	71985	uc008zjz.1	0	ENSMUSG00000029456	acyl-Coenzyme A dehydrogenase family, member 10	uc008zjz.1;uc029vod.2;uc008zkc.2;uc008zkd.2;uc033ils.1	71985;72399;72399;72399;72399	0;0;0;0;0	Unchanged	Unchanged	Unchanged
Acad11	46.4449125826599	-0.913228055535554	0.321223890431381	-2.84296430850505	0.00446960753973211	0.0148721462457901	39373	chr9	104063767	104063990	224	*	3.36	3.62	3.06	-0.56	0.496	0.821	11.97	12.54	6.66	10	Promoter (<=1kb)	9	104063703	104127646	63944	1	102632	uc009rhg.1	64	ENSMUSG00000090150	acyl-Coenzyme A dehydrogenase family, member 11	uc009rhg.1;uc009rhf.2;uc009rhe.1	102632;66663;74025	0;0;0	Unchanged	FGF_down	Unchanged
Acad12	22.20643875249	-0.459271531643983	0.428056411510706	-1.0729229122468	0.283305704930789	0.426641716395108	29239	chr5	121618375	121618855	481	*	5.14	4.71	5.47	0.76	0.106	0.386	32.23	20.06	49.45	39	Promoter (<=1kb)	5	121598281	121618938	20658	2	338350	uc008zjv.2	83	ENSMUSG00000042647	acyl-Coenzyme A dehydrogenase family, member 12	uc008zjv.2;uc008zjx.1;uc008zjy.1;uc008zjz.1	338350;338350;71985;71985	0;0;0;0	Unchanged	Unchanged	Unchanged
Acad8	197.339825425666	-0.215399847176962	0.197175969298036	-1.09242443662787	0.274646586939265	0.417205898207689	37864	chr9	26998846	27000575	1730	*	7.38	7.53	7.2	-0.33	0.243	0.601	232.05	137.89	135.03	160	Promoter (<=1kb)	9	26974138	26999549	25412	2	66948	uc009opy.3	0	ENSMUSG00000031969	acyl-Coenzyme A dehydrogenase family, member 8	uc009opy.3;uc009oqd.2;uc009oqa.2;uc009oqb.2;uc009oqc.2	66948;69091;77862;77862;77862	0;0;0;0;0	Unchanged	Unchanged	Unchanged
Acad9	353.488527605297	-0.475346187225917	0.156299192735245	-3.0412581082943	0.00235591778783657	0.00856384714118695	23377	chr3	36065490	36065962	473	*	4.59	4.66	4.52	-0.14	0.809	0.95	30.39	20.06	20.92	25	Promoter (<=1kb)	3	36066000	36092857	26858	1	229211	uc008oze.1	-38	ENSMUSG00000027710	acyl-Coenzyme A dehydrogenase family, member 9	uc008oze.1	229211	0	Unchanged	FGF_down	Unchanged
Acadl	502.380020214903	-0.294601489571081	0.171595789628412	-1.71683402144678	0.0860095028352883	0.170309075196714	549	chr1	66861835	66863354	1520	*	6.35	6.37	6.34	-0.03	0.944	0.987	95.77	69.36	95.09	67	Promoter (<=1kb)	1	66830839	66863309	32471	2	11363	uc007bir.2	0	ENSMUSG00000026003	acyl-Coenzyme A dehydrogenase, long-chain	uc007bir.2	11363	0	Unchanged	Unchanged	Unchanged
Acadm	469.755094070594	-0.587069286426452	0.148457956051261	-3.9544481282212	7.67115118000389e-05	0.000430246827327107	25082	chr3	153943559	153944576	1018	*	6.38	6.38	6.39	0	0.987	0.997	94.84	71.87	74.17	93	Promoter (<=1kb)	3	153922353	153944643	22291	2	11364	uc008ruj.2	67	ENSMUSG00000062908	acyl-Coenzyme A dehydrogenase, medium chain	uc008ruj.2	11364	0	Unchanged	FGF_down	Unchanged
Acads	441.50227972949	-0.455412007723978	0.162637600399198	-2.800164332271	0.0051076597310276	0.0166475999741592	29011	chr5	115118664	115120163	1500	*	6.79	6.7	6.86	0.16	0.618	0.883	111.42	96.94	80.83	152	Promoter (<=1kb)	5	115110299	115119346	9048	2	11409	uc008zdb.2	0	ENSMUSG00000029545	acyl-Coenzyme A dehydrogenase, short chain	uc008zdc.1;uc008zdb.2	106840;11409	0;0	Unchanged	FGF_down	Unchanged
Acadsb	149.468692951523	0.201479424955095	0.233443738143595	0.863074874302956	0.388096301363518	0.53488549283865	35108	chr7	131409293	131411043	1751	*	7.73	7.6	7.86	0.26	0.235	0.591	204.42	183.02	234.88	229	Promoter (<=1kb)	7	131410601	131437519	26919	1	66885	uc009kbk.2	0	ENSMUSG00000030861	acyl-Coenzyme A dehydrogenase, short/branched chain	uc009kbk.2;uc009kbl.2;uc009kbm.2;uc009kbj.1	66885;66885;66885;67143	0;0;0;0	Unchanged	Unchanged	Unchanged
Acadvl	640.419902503367	0.273286778528514	0.138742286806364	1.96974393906256	0.0488677244869687	0.107940684359314	5651	chr11	70014713	70015368	656	*	5.27	5.09	5.42	0.33	0.444	0.786	31.31	36.77	41.84	44	Promoter (<=1kb)	11	70010183	70015428	5246	2	11370	uc007jto.2	60	ENSMUSG00000018574	acyl-Coenzyme A dehydrogenase, very long chain	uc007jto.2;uc007jtp.3;uc007jtq.3;uc007jtm.1;uc007jtn.1;uc011xxn.1	11370;13385;13385;13543;13543;723896	0;0;0;0;0;2670	Unchanged	Unchanged	Unchanged
Acap2	551.563095320861	-0.233917747871438	0.144399229813082	-1.61993764214833	0.105245672809311	0.200142606430689	14869	chr16	31199377	31201195	1819	*	7.52	7.66	7.37	-0.3	0.202	0.55	212.71	192.21	155	175	Promoter (<=1kb)	16	31092413	31201238	108826	2	78618	uc007yxb.1	43	ENSMUSG00000049076	ArfGAP with coiled-coil, ankyrin repeat and PH domains 2	uc007yxb.1;uc007yxc.1;uc012aeh.1	78618;78618;78618	0;0;0	Unchanged	Unchanged	Unchanged
Acap3	883.328972358471	0.356086459912279	0.120095885789563	2.9650179735235	0.0030266524592896	0.0106772580263959	27598	chr4	155890863	155893747	2885	*	7.96	7.83	8.08	0.25	0.255	0.616	255.99	198.9	254.85	287	Promoter (<=1kb)	4	155891875	155907251	15377	1	140500	uc033ihg.1	0	ENSMUSG00000029033	ArfGAP with coiled-coil, ankyrin repeat and PH domains 3	uc033ihg.1;uc008wfi.2;uc012drb.2;uc008wfh.1	140500;433813;433813;71957	0;0;0;0	Unchanged	FGF_up	Unchanged
Acat1	1294.03263483291	-0.0734656129951429	0.142002849765553	-0.517353089155849	0.604909700367318	0.727132730442541	38269	chr9	53608913	53610755	1843	*	7.04	7.16	6.91	-0.25	0.341	0.704	156.54	129.53	129.33	111	Promoter (<=1kb)	9	53580522	53610350	29829	2	110446	uc009pmg.1	0	ENSMUSG00000032047	acetyl-Coenzyme A acetyltransferase 1	uc009pmg.1;uc009pmh.2;uc009pmi.2;uc012gtk.1	110446;75717;75717;75717	0;11279;0;0	Unchanged	Unchanged	Unchanged
Acat2	281.09219675627	-0.602608182631735	0.19472801164263	-3.09461477857463	0.00197068667655305	0.00735362071750299	15784	chr17	12960061	12961269	1209	*	6.67	6.74	6.6	-0.13	0.652	0.899	118.79	94.43	86.54	108	Promoter (<=1kb)	17	12943042	12960317	17276	2	110460	uc008alp.1	0	ENSMUSG00000023832	acetyl-Coenzyme A acetyltransferase 2	uc008alp.1;uc008alq.1	110460;110460	0;0	Unchanged	FGF_down	Unchanged
Acat3	133.582701809575	-0.0205597032753138	0.224106715448144	-0.0917406836033483	0.926904072827661	0.956634054513067	15783	chr17	12940034	12941785	1752	*	6.57	6.63	6.5	-0.13	0.681	0.91	114.18	83.57	77.98	103	Promoter (<=1kb)	17	12923959	12940396	16438	2	224530	uc008alo.1	0	ENSMUSG00000062480	acetyl-Coenzyme A acetyltransferase 3	uc008alp.1;uc008alq.1;uc008alo.1	110460;110460;224530	0;0;0	Unchanged	Unchanged	Unchanged
Acbd3	480.528335965116	0.543661835796787	0.139956696256447	3.88450035145597	0.000102540544501214	0.000558343775798867	2070	chr1	180725424	180727530	2107	*	7.67	7.47	7.84	0.38	0.118	0.413	203.5	150.43	252	207	Promoter (<=1kb)	1	180726043	180754204	28162	1	170760	uc007dwq.2	0	ENSMUSG00000026499	acyl-Coenzyme A binding domain containing 3	uc007dwq.2	170760	0	Unchanged	FGF_up	Unchanged
Acbd4	115.688316722531	-1.05202055467672	0.219162003120951	-4.80019592673703	1.58510478482665e-06	1.325764337876e-05	6859	chr11	103100930	103102730	1801	*	7.96	8.15	7.73	-0.42	0.0664	0.291	318.6	249.88	190.19	235	Promoter (<=1kb)	11	103101688	103112199	10512	1	67131	uc007lth.1	0	ENSMUSG00000056938	acyl-Coenzyme A binding domain containing 4	uc007lth.1;uc007lti.1;uc007ltj.1;uc007ltk.1;uc007ltl.1;uc007ltm.1;uc007ltn.1;uc007ltf.2	67131;67131;67131;67131;67131;67131;67131;72469	0;0;0;0;0;0;0;0	Unchanged	FGF_down	Unchanged
Acbd6	215.705473451403	0.164209517629637	0.180604681037664	0.909220717238177	0.363233630588806	0.509311162927898	1545	chr1	155557532	155558944	1413	*	7.14	6.99	7.28	0.28	0.343	0.706	156.54	97.78	120.77	189	Promoter (<=1kb)	1	155558120	155572287	14168	1	72482	uc007dbk.2	0	ENSMUSG00000033701	acyl-Coenzyme A binding domain containing 6	uc007dbk.2;uc007dbl.2;uc011wtw.1	72482;72482;72482	0;0;0	Unchanged	Unchanged	Unchanged
Accs	41.5365036201394	-1.17552906194717	0.337310253525586	-3.48500838518982	0.000492121619375268	0.00221371381060339	21424	chr2	93849147	93850272	1126	*	5.94	6.21	5.59	-0.62	0.107	0.388	93	55.16	45.65	51	Promoter (<=1kb)	2	93833467	93849799	16333	2	329470	uc008lgj.2	0	ENSMUSG00000040272	1-aminocyclopropane-1-carboxylate synthase (non-functional)	uc008lgj.2;uc008lgk.3	329470;329470	0;0	Unchanged	FGF_down	Unchanged
Ache	20.8544004347975	-0.755955532584791	0.472956606657243	-1.598361291383	0.109962594088924	0.207048331851778	29824	chr5	137286988	137288385	1398	*	6.9	6.94	6.86	-0.08	0.772	0.94	139.04	106.97	105.55	127	Promoter (<=1kb)	5	137287766	137291101	3336	1	11423	uc009abt.1	0	ENSMUSG00000023328	acetylcholinesterase	uc009abt.1;uc009abu.2;uc009abv.2;uc009abw.1;uc009abx.2;uc009aby.1	11423;11423;11423;11423;11423;11423	0;0;0;0;0;0	Unchanged	Unchanged	Unchanged
Acin1	2193.60110286291	0.0801955770042959	0.113018589410464	0.709578640315883	0.477965469068517	0.619055405971708	11677	chr14	54685116	54687899	2784	*	8.1	8.05	8.14	0.09	0.667	0.905	296.5	233.16	286.23	278	Promoter (<=1kb)	14	54642161	54686931	44771	2	56215	uc007twv.2	0	ENSMUSG00000022185	apoptotic chromatin condensation inducer 1	uc007twv.2;uc007tww.2;uc007twx.2;uc007twy.2	56215;56215;56215;58248	0;0;0;0	Unchanged	Unchanged	Unchanged
Acly	3609.77532459642	0.025293868558982	0.122334007763557	0.206760728446575	0.836196727532335	0.897330364704447	6679	chr11	100526795	100527890	1096	*	7.02	7.02	7.03	0.01	0.966	0.993	151.94	106.97	123.62	137	Promoter (<=1kb)	11	100476352	100528000	51649	2	104112	uc007lll.2	110	ENSMUSG00000020917	ATP citrate lyase	uc007lll.2;uc007llm.2	104112;104112	0;0	Unchanged	Unchanged	Unchanged
Aco1	1050.07821885168	-0.226384449359841	0.156781691731146	-1.4439469740386	0.148753891729842	0.262421625676026	25304	chr4	40141791	40144313	2523	*	8.63	8.6	8.67	0.07	0.736	0.929	423.58	350.16	349.95	463	Promoter (<=1kb)	4	40143265	40199009	55745	1	11428	uc008shd.1	0	ENSMUSG00000028405	aconitase 1	uc008shd.1	11428	0	Unchanged	Unchanged	Unchanged
Aco2	4186.46580975223	-0.0304932848581714	0.136623842057022	-0.223191533769373	0.823386440837386	0.890276347104075	13665	chr15	81871102	81873381	2280	*	8.26	8.23	8.28	0.05	0.822	0.954	338.86	262.41	310.96	310	Promoter (<=1kb)	15	81872463	81915137	42675	1	11429	uc007wxp.1	0	ENSMUSG00000022477	aconitase 2, mitochondrial	uc007wxp.1;uc007wxo.1	11429;68479	0;0	Unchanged	Unchanged	Unchanged
Acot13	116.228223819791	-0.335561860922804	0.268715640489043	-1.24876192659313	0.211752163310985	0.34274943877206	9485	chr13	24830582	24831498	917	*	7.08	7.25	6.89	-0.36	0.176	0.513	171.27	133.71	131.23	106	Promoter (<=1kb)	13	24817955	24831489	13535	2	66834	uc007pwj.1	0	ENSMUSG00000006717	acyl-CoA thioesterase 13	uc007pwl.2;uc011yxq.1;uc007pwm.2;uc007pwj.1	56196;56196;56196;66834	0;0;0;0	Unchanged	Unchanged	Unchanged
Acot2	34.375893120241	-1.35024503765762	0.413536561615093	-3.26511646850317	0.00109419074984981	0.00444462955191623	8608	chr12	83987070	83988711	1642	*	6.86	6.99	6.71	-0.28	0.314	0.68	143.65	111.15	92.24	117	Promoter (<=1kb)	12	83987861	83993877	6017	1	171210	uc011yor.2	0	ENSMUSG00000021226	acyl-CoA thioesterase 2	uc011yor.2	171210	0	Unchanged	FGF_down	Unchanged
Acot6	25.6914880605354	-0.678462191508028	0.405625653800246	-1.67263136626497	0.0943998881358388	0.183214108642888	8610	chr12	84100407	84101734	1328	*	7.27	7.09	7.43	0.34	0.181	0.52	155.62	117	183.53	161	Promoter (<=1kb)	12	84100654	84109783	9130	1	217700	uc007oei.1	0	ENSMUSG00000043487	acyl-CoA thioesterase 6	uc007oei.1	217700	0	Unchanged	Unchanged	Unchanged
Acot7	1179.35854835957	-0.0237535352593435	0.12098572069634	-0.196333378208838	0.844349237720547	0.903137827925182	27495	chr4	152177112	152180020	2909	*	8.4	8.43	8.37	-0.07	0.768	0.94	407.92	284.14	330.93	330	Promoter (<=1kb)	4	152178100	152271855	93756	1	70025	uc008vzx.2	0	ENSMUSG00000028937	acyl-CoA thioesterase 7	uc008vzx.2	70025	0	Unchanged	Unchanged	Unchanged
Acot8	113.024787656227	0.0647413937509051	0.233176271151373	0.277650008859076	0.781281039300527	0.861586176575005	22828	chr2	164804172	164804862	691	*	5.91	6.04	5.76	-0.28	0.464	0.799	80.11	51.81	45.65	63	Promoter (<=1kb)	2	164792768	164804881	12114	2	170789	uc008nwf.2	19	ENSMUSG00000017307	acyl-CoA thioesterase 8	uc008nwf.2;uc008nwg.2;uc008nwh.1	170789;170789;67538	0;0;0	Unchanged	Unchanged	Unchanged
Acot9	934.863068674363	0.411238627570867	0.164379314805661	2.50176628401851	0.012357547278766	0.0350242838690564	40635	chrX	155262463	155263680	1218	*	7.85	7.97	7.73	-0.24	0.332	0.697	303.87	196.39	205.4	218	Promoter (<=1kb)	20	155262443	155297654	35212	1	56360	uc009urs.2	20	ENSMUSG00000025287	acyl-CoA thioesterase 9	uc009urs.2;uc009urt.2	56360;56360	0;0	Unchanged	FGF_up	Unchanged
Acox1	887.024474921611	0.130536876630151	0.140664877978038	0.927999074868793	0.353408049507077	0.499072564825462	7223	chr11	116198121	116200055	1935	*	8	7.95	8.04	0.09	0.676	0.909	287.3	206.42	252.95	274	Promoter (<=1kb)	11	116171883	116199045	27163	2	11430	uc007mkl.2	0	ENSMUSG00000020777	acyl-Coenzyme A oxidase 1, palmitoyl	uc007mkl.2;uc007mkm.2;uc007mkn.2	11430;11430;69535	0;0;0	Unchanged	Unchanged	Unchanged
Acp1	81.09032839819	-0.210695326801489	0.245907710464053	-0.856806508441257	0.391551828152503	0.538096751762529	7822	chr12	30910592	30912051	1460	*	6.87	6.7	7.02	0.32	0.241	0.598	116.02	91.93	133.13	126	Promoter (<=1kb)	12	30893326	30911612	18287	2	11431	uc007ngw.2	0	ENSMUSG00000044573	acid phosphatase 1, soluble	uc007ngw.2;uc007ngx.2;uc007ngz.2;uc007nha.2;uc011ylg.2	11431;11431;24057;24057;24057	0;0;0;0;0	Unchanged	Unchanged	Unchanged
Acp6	246.814248570159	-0.347947489963823	0.173741990014611	-2.00266780606439	0.045212956543748	0.101576176054676	24281	chr3	97158181	97160031	1851	*	7.73	7.66	7.8	0.14	0.551	0.852	235.73	167.98	209.21	236	Promoter (<=1kb)	3	97158777	97176576	17800	1	66659	uc008qoq.2	0	ENSMUSG00000028093	acid phosphatase 6, lysophosphatidic	uc008qoq.2	66659	0	Unchanged	Unchanged	Unchanged
Acsbg2	2.22748884939783	-0.0584249375331426	1.81685261352886	-0.0321572245861288	0.974346668357161	0.986228944800541	16889	chr17	56872079	56872744	666	*	4.5	3.28	5.15	1.87	0.00166	0.0221	11.05	8.36	39.94	31	Promoter (1-2kb)	17	56843104	56874447	31344	2	328845	uc008ddi.1	1703	ENSMUSG00000024207	acyl-CoA synthetase bubblegum family member 2	uc008ddi.1;uc008ddj.1	328845;78625	0;-2889	FGF_up	Unchanged	Unchanged
Acsf2	501.849535236645	-0.697130670864374	0.184080046277829	-3.78710612562649	0.000152412014659714	0.000795123701096858	6379	chr11	94600889	94603467	2579	*	8.03	8.07	7.98	-0.1	0.69	0.915	316.76	222.3	209.21	294	Promoter (<=1kb)	11	94557102	94601786	44685	2	264895	uc007kzc.1	0	ENSMUSG00000076435	acyl-CoA synthetase family member 2	uc007kzc.1	264895	0	Unchanged	FGF_down	Unchanged
Acsl1	177.425354072396	-0.338019963001302	0.19832694975684	-1.70435719107128	0.0883143764199934	0.173671611628521	35944	chr8	46471100	46471627	528	*	5.4	5.45	5.34	-0.1	0.81	0.95	47.88	39.28	35.18	46	Promoter (<=1kb)	8	46471037	46536051	65015	1	14081	uc009lqe.2	63	ENSMUSG00000018796	acyl-CoA synthetase long-chain family member 1	uc009lqe.2	14081	0	Unchanged	Unchanged	Unchanged
Acsl4	2343.60911745501	0.869006220760015	0.119777114355593	7.25519416155007	4.0108606809114e-13	1.01134613625006e-11	40555	chrX	142389159	142391954	2796	*	7.75	7.66	7.84	0.17	0.469	0.803	236.65	168.81	207.3	250	Promoter (<=1kb)	20	142317993	142390535	72543	2	50790	uc009ulu.1	0	ENSMUSG00000031278	acyl-CoA synthetase long-chain family member 4	uc009ulu.1;uc009ulv.1;uc009ulw.1;uc012hps.1	50790;50790;50790;50790	0;0;0;0	Unchanged	FGF_up	Unchanged
Acsl5	2576.82489493754	-0.113051505268272	0.121316613289996	-0.931871589573915	0.351402891643866	0.496978743453732	19888	chr19	55252967	55255504	2538	*	8.97	9	8.95	-0.05	0.83	0.956	616.03	406.15	455.5	533	Promoter (<=1kb)	19	55253369	55296628	43260	1	433256	uc008hxp.1	0	ENSMUSG00000024981	acyl-CoA synthetase long-chain family member 5	uc008hxp.1	433256	0	Unchanged	Unchanged	Unchanged
Acss2	136.557891784022	-0.602978570047165	0.228016374710414	-2.64445292936949	0.00818230862062177	0.0247604198860765	22600	chr2	155518027	155519374	1348	*	6.32	6.5	6.11	-0.39	0.23	0.585	102.21	78.56	60.86	77	Promoter (<=1kb)	2	155518043	155525291	7249	1	60525	uc008nks.1	0	ENSMUSG00000027605	acyl-CoA synthetase short-chain family member 2	uc012chc.1;uc008nkr.2;uc008nks.1;uc008nkt.1;uc008nku.1;uc008nkv.1	207182;207182;60525;60525;60525;60525	0;0;0;0;0;0	Unchanged	FGF_down	Unchanged
Acta1	4.06383557209775	-2.83450472581511	1.19278918822469	-2.37636688343386	0.0174840687476841	0.0468355278184919	37389	chr8	123883945	123884867	923	*	5.76	5.59	5.91	0.32	0.388	0.744	50.65	45.96	65.61	55	Distal Intergenic	8	123891758	123894775	3018	2	11459	uc009nwr.2	9908	ENSMUSG00000031972	actin, alpha 1, skeletal muscle	NA	NA	NA	Unchanged	FGF_down	Unchanged
Actb	33464.2440045014	-0.0500107374689946	0.130740012067397	-0.382520520521397	0.702075310927062	0.803595386720191	30070	chr5	142904644	142910871	6228	*	9.72	9.88	9.54	-0.34	0.0836	0.336	1075.52	809.8	685.63	808	Promoter (<=1kb)	5	142903115	142906754	3640	2	11461	uc009ajk.2	0	ENSMUSG00000029580	actin, beta	uc009ajk.2	11461	0	Unchanged	Unchanged	Unchanged
Actl6a	489.522462850074	0.308871938251798	0.13992531390238	2.20740571979196	0.0272857271357843	0.0674635934478474	23355	chr3	32708652	32709754	1103	*	6.98	7.08	6.88	-0.2	0.497	0.821	165.75	104.46	107.46	128	Promoter (<=1kb)	3	32708546	32726971	18426	1	56456	uc012coo.1	106	ENSMUSG00000027671	actin-like 6A	uc012coo.1	56456	0	Unchanged	Unchanged	Unchanged
Actn1	18.6332174985088	1.07510148838428	0.472264117376596	2.27648353712838	0.0228170848392878	0.0583168052185706	8495	chr12	80257283	80261881	4599	*	8.74	8.82	8.65	-0.16	0.391	0.747	488.96	414.51	408.9	397	Promoter (<=1kb)	12	80167542	80260371	92830	2	109711	uc007oap.2	0	ENSMUSG00000015143	actinin, alpha 1	uc007oap.2;uc007oaq.2	109711;109711	0;0	Unchanged	Unchanged	Unchanged
Actn3	124.522547915349	-0.0308179998690088	0.262211703414897	-0.117530985336095	0.906439291444036	0.943088992316743	18730	chr19	4877631	4878488	858	*	6.11	5.82	6.35	0.53	0.112	0.4	56.17	56.83	80.83	82	Promoter (<=1kb)	19	4861216	4877909	16694	2	11474	uc008gbf.2	0	ENSMUSG00000006457	actinin alpha 3	uc008gbf.2;uc008gbh.2;uc012bgp.1;uc008gbg.2;uc008gbi.2	11474;70605;70605;70605;70605	0;0;0;0;0	Unchanged	Unchanged	Unchanged
Actn4	17392.46563135	0.4475364789805	0.106945099272432	4.18473106318267	2.8550390860014e-05	0.000178097218976455	33187	chr7	28952870	28962316	9447	*	9.64	9.42	9.84	0.41	0.023	0.147	763.36	610.07	890.08	937	Promoter (<=1kb)	7	28893254	28962280	69027	2	60595	uc009gah.1	0	ENSMUSG00000054808	actinin alpha 4	uc009gah.1	60595	0	Unchanged	FGF_up	Unchanged
Actr10	591.994014637722	0.5378120900928	0.143188654248403	3.75596860600286	0.00017267233969044	0.000887265607902036	8235	chr12	70936960	70938888	1929	*	7.37	7.4	7.34	-0.06	0.822	0.954	186.01	151.26	165.46	159	Promoter (<=1kb)	12	70937857	70964718	26862	1	56444	uc007nty.3	0	ENSMUSG00000021076	ARP10 actin-related protein 10	uc007nty.3	56444	0	Unchanged	FGF_up	Unchanged
Actr1a	972.790260670087	-0.169971951714456	0.125605892455858	-1.35321638492549	0.175986512278729	0.297939927397257	19722	chr19	46395296	46396484	1189	*	6.8	6.87	6.74	-0.13	0.646	0.895	131.68	101.96	105.55	108	Promoter (<=1kb)	19	46376814	46395735	18922	2	54130	uc008htm.1	0	ENSMUSG00000025228	ARP1 actin-related protein 1A, centractin alpha	uc008htn.2;uc008hto.2;uc008htp.2;uc008htq.2;uc008htm.1;uc012bmz.1	24069;24069;24069;24069;54130;54130	0;0;0;0;0;0	Unchanged	Unchanged	Unchanged
Actr1b	1172.61019554232	0.0719766523250674	0.112549178365773	0.639512907781087	0.522489319336614	0.65796990250882	180	chr1	36708365	36710024	1660	*	7.75	7.55	7.93	0.38	0.111	0.397	219.16	156.28	252	235	Promoter (<=1kb)	1	36699202	36709925	10724	2	226977	uc007aqx.1	0	ENSMUSG00000037351	ARP1 actin-related protein 1B, centractin beta	uc007aqx.1;uc007aqy.2	226977;71166	0;-4514	Unchanged	Unchanged	Unchanged
Actr2	1750.65578171965	0.321889389669395	0.115569955385152	2.7852341778333	0.00534890773483095	0.0173158573257583	4756	chr11	20112050	20114065	2016	*	7.69	7.66	7.72	0.06	0.786	0.945	209.03	196.39	191.14	232	Promoter (<=1kb)	11	20062304	20112951	50648	2	66713	uc011xrw.1	0	ENSMUSG00000020152	ARP2 actin-related protein 2	uc011xrw.1;uc007ict.2	66713;66713	0;0	Unchanged	FGF_up	Unchanged
Actr3	1496.03848699496	0.423546324093727	0.136793403036434	3.09624817200372	0.00195986256084988	0.00732466458013688	1114	chr1	125433539	125435707	2169	*	8.28	8.27	8.28	0.01	0.948	0.988	353.6	263.25	301.45	321	Promoter (<=1kb)	1	125392905	125435727	42823	2	74117	uc007cke.2	20	ENSMUSG00000026341	ARP3 actin-related protein 3	uc007cke.2;uc007ckf.2;uc029qta.1	74117;74117;74117	0;0;0	Unchanged	FGF_up	Unchanged
Actr3b	99.8156798627698	-1.1281152453562	0.229421696957428	-4.91721254056252	8.77852258729191e-07	7.82407919189507e-06	27872	chr5	25759382	25760513	1132	*	6.15	6.15	6.15	0	0.99	0.998	79.19	62.68	51.35	91	Promoter (<=1kb)	5	25759973	25777338	17366	1	242894	uc008wtb.2	0	ENSMUSG00000056367	ARP3 actin-related protein 3B	uc008wtb.2;uc008wtc.2;uc008wtd.2	242894;242894;242894	0;0;0	Unchanged	FGF_down	Unchanged
Actr5	205.564924808046	0.52562051514899	0.180189405001684	2.91704451293392	0.00353365339624467	0.0121607329087004	22736	chr2	158624909	158625885	977	*	6.44	6.59	6.28	-0.31	0.309	0.675	103.13	89.42	71.32	84	Promoter (<=1kb)	2	158624913	158629157	4245	1	109275	uc008nql.1	0	ENSMUSG00000037761	ARP5 actin-related protein 5	uc008nql.1;uc008nqm.1;uc012cij.1	109275;109275;109275	0;0;0	Unchanged	FGF_up	Unchanged
Actr6	36.6409010933574	0.0918826736011216	0.329481867968511	0.278870197524505	0.780344440498977	0.861162737119236	3773	chr10	89731799	89732244	446	*	4.27	4.01	4.49	0.48	0.437	0.781	22.1	10.03	21.87	23	Promoter (<=1kb)	10	89711973	89732295	20323	2	67019	uc007gss.1	51	ENSMUSG00000019948	ARP6 actin-related protein 6	uc007gss.1	67019	0	Unchanged	Unchanged	Unchanged
Actr8	551.775166270685	0.224052840486824	0.140378183973363	1.59606595658296	0.110474068369494	0.2078366228793	11308	chr14	29977839	29979519	1681	*	8.55	8.61	8.48	-0.13	0.501	0.823	418.97	363.53	336.63	377	Promoter (<=1kb)	14	29978337	29993221	14885	1	56249	uc007sum.2	0	ENSMUSG00000015971	ARP8 actin-related protein 8	uc007sum.2;uc007sul.1	56249;80795	0;0	Unchanged	Unchanged	Unchanged
Acvr1	8.0202385584632	1.84775398201309	0.781119091122992	2.36552147170879	0.0180046992266737	0.048033965436876	20961	chr2	58565545	58568767	3223	*	7.74	7.66	7.82	0.16	0.504	0.825	238.49	166.31	217.76	234	Promoter (<=1kb)	2	58446438	58566828	120391	2	11477	uc008jss.1	0	ENSMUSG00000026836	activin A receptor, type 1	uc008jss.1;uc008jst.1;uc008jsu.1;uc008jsv.2	11477;11477;11477;76654	0;0;0;0	Unchanged	FGF_up	Unchanged
Acvr1b	311.221091364629	-0.337971948967786	0.165437696612192	-2.04289563919665	0.0410627701091342	0.0939655807666805	14157	chr15	101174006	101174698	693	*	6.12	6.07	6.16	0.1	0.772	0.94	77.35	56.83	69.42	74	Promoter (<=1kb)	15	101174125	101212601	38477	1	11479	uc007xsr.1	0	ENSMUSG00000000532	activin A receptor, type 1B	uc007xsr.1	11479	0	Unchanged	Unchanged	Unchanged
Acvr2a	273.422638634304	0.480001886735273	0.161450366869978	2.97306160426279	0.0029484526720853	0.0104234221182464	20891	chr2	48813342	48815101	1760	*	7.28	7.35	7.2	-0.16	0.563	0.858	196.13	131.21	137.89	156	Promoter (<=1kb)	2	48814109	48903264	89156	1	11480	uc008jpn.2	0	ENSMUSG00000052155	activin receptor IIA	uc008jpn.2;uc008jpo.2	11480;11480	0;0	Unchanged	FGF_up	Unchanged
Acvr2b	107.161374016751	-0.685080715367941	0.242455351806247	-2.8255953529762	0.00471928394446168	0.0155814590343111	39714	chr9	119402154	119403455	1302	*	6.56	6.67	6.45	-0.22	0.52	0.835	132.6	71.04	78.93	96	Promoter (<=1kb)	9	119402178	119442148	39971	1	11481	uc009sax.2	0	ENSMUSG00000061393	activin receptor IIB	uc009sax.2;uc009say.2	11481;11481	0;0	Unchanged	FGF_down	Unchanged
Acy1	49.0535667757978	-0.351864039723125	0.317811391319152	-1.1071473500765	0.268230226466964	0.409698104374844	39398	chr9	106437685	106438239	555	*	5.07	5.09	5.05	-0.04	0.948	0.988	49.72	18.39	35.18	31	Promoter (<=1kb)	9	106432981	106438236	5256	2	109652	uc009rjp.2	0	ENSMUSG00000023262	aminoacylase 1	uc009rjp.2;uc033jmr.1;uc009rjq.2;uc009rjr.2;uc012gzu.1	109652;109652;68644;68644;68644	0;0;0;0;0	Unchanged	Unchanged	Unchanged
Acy3	63.31575794195	-0.261397243806907	0.304281252315869	-0.859064572060965	0.390304891910549	0.536691678338114	18653	chr19	3986583	3986986	404	*	4	3.7	4.24	0.54	0.422	0.77	10.13	15.88	21.87	16	Promoter (<=1kb)	19	3986661	3990007	3347	1	71670	uc008fxz.2	0	ENSMUSG00000024866	aspartoacylase (aminoacylase) 3	uc008fxw.2;uc008fxx.3;uc008fxy.3;uc056zhb.2;uc056zhc.2;uc008fxz.2	621603;71670;71670;71670;71670;71670	14255;0;0;0;0;0	Unchanged	Unchanged	Unchanged
Acyp1	43.2350628177725	-0.0527473556634081	0.372748301150585	-0.141509312049417	0.887467604118	0.931011393348401	8667	chr12	85279521	85280873	1353	*	6.84	6.96	6.7	-0.26	0.342	0.705	140.89	108.64	102.7	105	Promoter (<=1kb)	12	85272398	85280435	8038	2	66204	uc007ogu.2	0	ENSMUSG00000008822	acylphosphatase 1, erythrocyte (common) type	uc007ogu.2;uc007ogv.4	66204;66204	0;0	Unchanged	Unchanged	Unchanged
Acyp2	40.9617109749037	-0.0791737649730141	0.355458287285525	-0.222737147521946	0.82374008799713	0.890477806352655	4915	chr11	30648504	30650173	1670	*	7.21	7.13	7.29	0.16	0.528	0.839	152.86	127.03	138.84	174	Promoter (<=1kb)	11	30505992	30649396	143405	2	75572	uc007ihw.1	0	ENSMUSG00000060923	acylphosphatase 2, muscle type	uc007ihw.1	75572	0	Unchanged	Unchanged	Unchanged
Ada	58.3362663472003	0.176811652592187	0.30156432517634	0.58631488485515	0.557663930139694	0.688538371083429	22800	chr2	163749873	163750175	303	*	3.76	4.08	3.35	-0.73	0.331	0.697	23.02	10.86	10.46	10	Promoter (<=1kb)	2	163726571	163750239	23669	2	11486	uc008ntl.2	64	ENSMUSG00000017697	adenosine deaminase	uc008ntl.2;uc033hrg.1	11486;11486	0;0	Unchanged	Unchanged	Unchanged
Adam10	1766.91140467264	-0.750042615140702	0.135869948552886	-5.52029807274681	3.3842509425126e-08	4.00480864009015e-07	38841	chr9	70678936	70680381	1446	*	7.55	7.46	7.64	0.18	0.42	0.77	183.24	167.98	204.45	194	Promoter (<=1kb)	9	70678982	70780229	101248	1	11487	uc009qor.2	0	ENSMUSG00000054693	a disintegrin and metallopeptidase domain 10	uc009qor.2	11487	0	Unchanged	FGF_down	Unchanged
Adam15	3144.3275292184	-0.482470397953956	0.177183175915529	-2.72300344240343	0.00646913837915647	0.0202512157956202	23994	chr3	89348835	89350785	1951	*	7.74	7.57	7.89	0.32	0.158	0.485	207.18	173.83	224.42	250	Promoter (<=1kb)	3	89339012	89350028	11017	2	11490	uc008pyv.2	0	ENSMUSG00000028041	a disintegrin and metallopeptidase domain 15 (metargidin)	uc008pyv.2;uc008pyw.2;uc008pyx.2;uc008pyy.2	11490;11490;11490;77772	0;0;0;0	Unchanged	FGF_down	Unchanged
Adam17	1161.04512976653	0.132577111485942	0.136776146022891	0.969299949888588	0.332395554292004	0.478995860248135	7758	chr12	21372772	21374840	2069	*	7.69	7.68	7.7	0.03	0.916	0.979	234.81	174.66	178.78	238	Promoter (<=1kb)	12	21323509	21373632	50124	2	11491	uc007ndu.2	0	ENSMUSG00000052593	a disintegrin and metallopeptidase domain 17	uc007ndu.2;uc007ndv.2;uc011yks.2;uc011ykt.2;uc011yku.2	11491;11491;11491;11491;11491	0;0;0;0;0	Unchanged	Unchanged	Unchanged
Adam23	282.647725737548	-0.376893162311114	0.159921487230227	-2.3567387274765	0.0184362131901556	0.0489013803925299	456	chr1	63445893	63446480	588	*	4.01	4.16	3.83	-0.33	0.64	0.892	25.78	10.03	11.41	17	Promoter (<=1kb)	1	63445891	63532849	86959	1	23792	uc007bgd.2	2	ENSMUSG00000025964	a disintegrin and metallopeptidase domain 23	uc007bgd.2;uc007bge.2;uc007bgf.4;uc007bgg.2	23792;23792;23792;23792	0;0;0;0	Unchanged	FGF_down	Unchanged
Adam33	5.76442270441934	-4.11817982324236	1.24503981811869	-3.30766917114755	0.00094075872341131	0.00389333388580747	22098	chr2	131067091	131067786	696	*	4.98	5.28	4.6	-0.68	0.173	0.508	43.28	34.26	29.48	19	Downstream (1-2kb)	2	131050822	131063814	12993	2	110751	uc057lee.1	-3277	ENSMUSG00000027318	a disintegrin and metallopeptidase domain 33	uc008mkm.3;uc008mkn.3;uc057lee.1;uc008mko.1;uc008mkp.1	110751;110751;110751;20612;20612	0;0;0;18979;18979	Unchanged	FGF_down	Unchanged
Adam9	1869.22819576567	-0.265381637442898	0.13031838184805	-2.03640985776151	0.0417092163931757	0.0951567953779732	35641	chr8	25014921	25016912	1992	*	7.63	7.65	7.62	-0.03	0.902	0.976	221	180.51	184.48	209	Promoter (<=1kb)	8	24949611	25016922	67312	2	11502	uc009lfk.2	10	ENSMUSG00000031555	a disintegrin and metallopeptidase domain 9 (meltrin gamma)	uc009lfk.2;uc009lfl.2;uc009lfm.2;uc009lfn.2	11502;11502;69742;69742	0;0;0;0	Unchanged	Unchanged	Unchanged
Adamts14	456.964392052957	-0.975117574822049	0.168529914506186	-5.78602070545912	7.20733341681059e-09	9.76667222196375e-08	3084	chr10	61272398	61274716	2319	*	7.57	7.2	7.86	0.66	0.00845	0.0727	176.8	117	236.78	227	Promoter (<=1kb)	10	61197112	61273438	76327	2	237360	uc007ffu.1	0	ENSMUSG00000059901	a disintegrin-like and metallopeptidase (reprolysin type) with thrombospondin type 1 motif, 14	uc007ffu.1;uc011xes.1	237360;237360	0;0	Unchanged	FGF_down	Unchanged
Adamts4	479.930717978321	0.135823019275204	0.292093414743301	0.46499856696382	0.641932482824227	0.757619568867277	1900	chr1	171250397	171252461	2065	*	6.37	6.28	6.45	0.18	0.56	0.857	84.72	70.2	90.34	85	Promoter (<=1kb)	1	171250422	171259922	9501	1	240913	uc007dnn.1	0	ENSMUSG00000006403	a disintegrin-like and metallopeptidase (reprolysin type) with thrombospondin type 1 motif, 4	uc007dnm.2;uc011wvz.2;uc007dnn.1;uc007dno.1	226646;226646;240913;240913	0;0;0;0	Unchanged	Unchanged	Unchanged
Adamts6	909.454088963196	2.20996579966651	0.480006272190899	4.60403525474684	4.14382268425519e-06	3.16668597968146e-05	10740	chr13	104285229	104289543	4315	*	8.57	8.23	8.85	0.61	0.00169	0.0223	314.92	287.48	490.68	430	Promoter (<=1kb)	13	104287835	104496695	208861	1	108154	uc007rti.2	0	ENSMUSG00000046169	a disintegrin-like and metallopeptidase (reprolysin type) with thrombospondin type 1 motif, 6	uc007rti.2;uc011zeh.2	108154;108154	0;0	Unchanged	FGF_up	FGF_up
Adamts7	790.560844547649	2.20501465574751	0.219808061801766	10.0315458754015	1.10768593641115e-23	8.27441394499132e-22	39180	chr9	90162850	90164709	1860	*	6.94	5.95	7.52	1.58	1.3e-08	1.51e-06	69.98	53.49	193.99	174	Promoter (<=1kb)	9	90162978	90200102	37125	1	108153	uc009raa.2	0	ENSMUSG00000032363	a disintegrin-like and metallopeptidase (reprolysin type) with thrombospondin type 1 motif, 7	uc009raa.2;uc009rab.1;uc012gyg.1;uc012gyh.1	108153;108153;108153;108153	0;0;0;0	FGF_up	FGF_up	FGF_up
Adamtsl4	342.43645713709	-0.377145547343746	0.231131726066299	-1.63173422256867	0.102735487369133	0.19611795959685	24187	chr3	95686564	95690810	4247	*	8.52	8.6	8.45	-0.15	0.49	0.817	432.79	340.97	311.91	387	Promoter (<=1kb)	3	95676201	95687917	11717	2	229595	uc008qkm.2	0	ENSMUSG00000015850	ADAMTS-like 4	uc008qkm.2;uc008qkn.2	229595;229595	0;0	Unchanged	Unchanged	Unchanged
Adamtsl5	300.987909602346	-0.863248354161294	0.191591354567803	-4.50567488344468	6.61623223032923e-06	4.81884263357068e-05	3477	chr10	80347135	80349486	2352	*	7.2	7.05	7.33	0.29	0.267	0.63	154.7	109.48	165.46	157	Promoter (<=1kb)	10	80339793	80347625	7833	2	66548	uc007gcv.3	0	ENSMUSG00000043822	ADAMTS-like 5	uc007gcv.3;uc033frc.1	66548;66548	0;0	Unchanged	FGF_down	Unchanged
Adap1	103.152498013088	-1.17042918437195	0.284241229928079	-4.11773191618998	3.82619413510379e-05	0.000232963180350283	29930	chr5	139325103	139325394	292	*	3.47	3.23	3.67	0.44	0.592	0.871	13.81	5.01	10.46	15	Promoter (<=1kb)	5	139271876	139325464	53589	2	231821	uc009agi.1	70	ENSMUSG00000056413	ArfGAP with dual PH domains 1	uc009agi.1	231821	0	Unchanged	FGF_down	Unchanged
Adap2	3.4772274852025	-1.16890807786881	1.124012282749	-1.03994244174094	0.298366642684693	0.443496344231189	6059	chr11	80151607	80153806	2200	*	6.91	7.22	6.5	-0.71	0.0133	0.101	177.72	120.34	84.63	97	Promoter (<=1kb)	11	80154162	80178827	24666	1	216991	uc007klk.1	-356	ENSMUSG00000020709	ArfGAP with dual PH domains 2	uc007klk.1;uc007kll.1	216991;216991	0;0	Unchanged	Unchanged	Unchanged
Adarb1	2041.87756262569	2.55609338326604	0.220697917096131	11.5818645544927	5.09261749355085e-31	6.63828357543998e-29	3352	chr10	77417424	77418190	767	*	4.83	4.3	5.21	0.91	0.0733	0.31	20.26	19.22	39.94	34	Promoter (<=1kb)	10	77290727	77418273	127547	2	110532	uc007fvl.2	83	ENSMUSG00000020262	adenosine deaminase, RNA-specific, B1	uc011xhd.1;uc007fvl.2;uc007fvm.2;uc007fvn.2;uc007fvo.2;uc007fvp.2;uc007fvq.2;uc007fvr.1;uc007fvs.1	100045653;110532;110532;110532;110532;110532;110532;110532;110532	0;0;0;0;0;0;0;0;0	Unchanged	FGF_up	Unchanged
Adat3	68.5270208067914	0.682776021760303	0.285400925585672	2.39233989994663	0.0167413302605304	0.0451064876631785	3503	chr10	80602229	80604186	1958	*	6.99	6.92	7.06	0.15	0.575	0.864	134.44	106.97	122.67	145	Promoter (<=1kb)	10	80602880	80607654	4775	1	100113398	uc007gdx.1	0	ENSMUSG00000113640	adenosine deaminase, tRNA-specific 3	uc007gdx.1;uc007gdy.1;uc007gdz.1	100113398;56214;56214	0;0;0	Unchanged	FGF_up	Unchanged
Adck1	232.393215570368	-0.336564356922813	0.172820218725964	-1.94748253071299	0.0514769121126564	0.112642265391884	8768	chr12	88360511	88361277	767	*	6.15	6.11	6.19	0.08	0.8	0.947	74.59	63.51	74.17	72	Promoter (<=1kb)	12	88360514	88461726	101213	1	72113	uc007oju.2	0	ENSMUSG00000021044	aarF domain containing kinase 1	uc029rul.1;uc007oju.2;uc007ojv.2;uc007ojw.2	71818;72113;72113;72113	16046;0;0;0	Unchanged	Unchanged	Unchanged
Adck2	382.504758655464	-1.03104187572156	0.164733451447144	-6.258849472673	3.87827982504464e-10	6.31514992764761e-09	30958	chr6	39573275	39575430	2156	*	8.29	8.2	8.37	0.17	0.445	0.787	354.52	233.16	321.42	342	Promoter (<=1kb)	6	39573876	39588769	14894	1	57869	uc009bmb.1	0	ENSMUSG00000046947	aarF domain containing kinase 2	uc009bmb.1	57869	0	Unchanged	FGF_down	Unchanged
Adck5	234.856684708028	-0.158407101900918	0.18384491342023	-0.861634401267514	0.388888734157809	0.535446521678799	13330	chr15	76576383	76577594	1212	*	6.96	7.04	6.87	-0.16	0.558	0.856	151.01	111.98	102.7	132	Promoter (<=1kb)	15	76576359	76595812	19454	1	268822	uc007wkv.3	24	ENSMUSG00000022550	aarF domain containing kinase 5	uc007wkv.3;uc011zuw.2	268822;268822	0;0	Unchanged	Unchanged	Unchanged
Adcy6	2347.61537746133	-0.327371364935141	0.138343927194151	-2.36635876669678	0.017964026860376	0.0479575718193465	13975	chr15	98607846	98610081	2236	*	7.76	7.75	7.77	0.02	0.923	0.981	253.23	177.17	180.68	257	Promoter (<=1kb)	15	98589978	98607633	17656	2	11512	uc007xna.3	-213	ENSMUSG00000022994	adenylate cyclase 6	uc007xmz.3;uc011zyz.3;uc007xna.3	11512;11512;11512	0;0;0	Unchanged	FGF_down	Unchanged
Adcy7	4655.25736582195	0.0281252883740939	0.197744883371942	0.142230169977104	0.886898201835567	0.930904303885018	36593	chr8	88279932	88286876	6945	*	9.61	9.03	10.03	0.99	1.31e-08	1.52e-06	562.62	486.38	1066	1018	Promoter (<=1kb)	8	88282992	88329962	46971	1	11513	uc009mri.2	0	ENSMUSG00000031659	adenylate cyclase 7	uc009mrh.2;uc009mri.2;uc009mrj.2	11513;11513;11513	0;0;0	Unchanged	Unchanged	Unchanged
Adcy9	454.811569582125	-0.615034764517738	0.243690131033134	-2.52383944278036	0.0116080932169417	0.0332470477184011	14311	chr16	4419445	4420489	1045	*	5.81	5.92	5.7	-0.22	0.567	0.86	70.9	50.14	42.79	61	Promoter (<=1kb)	16	4284886	4420498	135613	2	11515	uc007xzr.2	9	ENSMUSG00000005580	adenylate cyclase 9	uc007xzr.2;uc007xzs.2	11515;11515	0;0	Unchanged	FGF_down	Unchanged
Adcyap1	213.406709559813	0.88315100707055	0.228667567892562	3.86216119412916	0.000112388368314522	0.000607263009988774	17382	chr17	93194540	93195386	847	*	4.83	3.4	5.54	2.14	0.000132	0.00318	11.05	10.03	58.96	34	Distal Intergenic	17	93199017	93206537	7521	1	11516	uc008dwi.2	-3631	ENSMUSG00000024256	adenylate cyclase activating polypeptide 1	uc008dwi.2;uc008dwj.2;uc057bka.1	11516;11516;11516	-3631;-3782;-3782	FGF_up	FGF_up	FGF_up
Add3	293.315019325808	-0.838739401385775	0.18064181315895	-4.64310774298835	3.43207257257814e-06	2.66672163121135e-05	19823	chr19	53141636	53142454	819	*	5.98	6.14	5.79	-0.35	0.356	0.717	85.64	55.16	61.81	49	Promoter (1-2kb)	19	53140443	53247326	106884	1	27360	uc008hwi.3	1193	ENSMUSG00000025026	adducin 3 (gamma)	uc008hwi.3;uc008hwj.3;uc008hwk.3;uc008hwl.3	27360;27360;27360;27360	0;0;0;0	Unchanged	FGF_down	Unchanged
Adgra3	1115.50593693907	-0.0679434517747217	0.198954393766203	-0.341502645347778	0.732725213743238	0.827744022179506	28272	chr5	50057786	50059450	1665	*	6.97	6.74	7.17	0.43	0.11	0.394	122.47	91.09	137.89	150	Promoter (<=1kb)	5	49959951	50058996	99046	2	70693	uc008xjz.2	0	ENSMUSG00000029090	adhesion G protein-coupled receptor A3	uc008xjz.2	70693	0	Unchanged	Unchanged	Unchanged
Adgrb2	604.19683395336	-0.14899990044733	0.230579068636329	-0.646198726226681	0.518150664359192	0.655434200566933	26592	chr4	129984857	129985484	628	*	4.66	4.38	4.9	0.52	0.336	0.701	24.86	16.71	23.77	36	Promoter (<=1kb)	4	129984870	130022633	37764	1	230775	uc008uym.3	0	ENSMUSG00000028782	adhesion G protein-coupled receptor B2	uc008uym.3;uc008uyn.3;uc008uyo.3	230775;230775;230775	0;0;0	Unchanged	Unchanged	Unchanged
Adgrg1	1102.62208776149	1.13036050327799	0.477562494320245	2.36693734688468	0.0179359688448492	0.0478933645294097	36690	chr8	94983915	94984240	326	*	4.52	4.32	4.7	0.38	0.505	0.825	24.86	15.04	20.92	31	Intron (uc009mxm.2/14766, intron 1 of 14)	8	94977109	95014196	37088	1	14766	uc009mxm.2	6806	ENSMUSG00000031785	adhesion G protein-coupled receptor G1	uc009mxm.2;uc009mxl.2;uc009mxn.2	14766;14766;14766	0;0;0	Unchanged	FGF_up	Unchanged
Adgrl1	2669.84423237515	-0.255868041163681	0.173932060932011	-1.47108037352411	0.141269382089976	0.252233590489901	36459	chr8	83899821	83901518	1698	*	7.34	7.17	7.5	0.33	0.226	0.582	164.83	123.68	146.44	215	Promoter (<=1kb)	8	83900098	83937933	37836	1	330814	uc009mlg.2	0	ENSMUSG00000013033	adhesion G protein-coupled receptor L1	uc009mlg.2;uc009mlh.2	330814;330814	0;0	Unchanged	Unchanged	Unchanged
Adgrl2	1274.27927037435	-1.61873276918365	0.233092179354284	-6.94460351980873	3.79524691199362e-12	8.33838071546833e-11	25031	chr3	148987136	148990695	3560	*	7.39	7.64	7.09	-0.54	0.0369	0.201	227.44	170.48	116.01	157	Promoter (<=1kb)	3	148888941	148989480	100540	2	99633	uc008rsc.1	0	ENSMUSG00000028184	adhesion G protein-coupled receptor L2	uc008rsc.1	99633	0	Unchanged	FGF_down	Unchanged
Adh1	2.33819908972462	-0.384815742073148	1.55723692568513	-0.247114447214795	0.804819653141896	0.878309277226675	24858	chr3	138272561	138272821	261	*	2.52	3.39	-0.04	-3.43	0.0156	0.113	10.13	10.86	0.95	1	Distal Intergenic	3	138277645	138290691	13047	1	11522	uc008rnf.1	-4824	ENSMUSG00000074207	alcohol dehydrogenase 1 (class I)	uc008rnf.1	11522	-4824	Unchanged	Unchanged	Unchanged
Adh5	748.494739406851	-0.276819830041467	0.15290926378139	-1.81035355998593	0.0702409761170786	0.144719901146582	24859	chr3	138442155	138443749	1595	*	7.28	7.29	7.28	-0.01	0.975	0.995	162.06	150.43	161.66	149	Promoter (<=1kb)	3	138443093	138455499	12407	1	11532	uc008rnk.2	0	ENSMUSG00000028138	alcohol dehydrogenase 5 (class III), chi polypeptide	uc033iac.1;uc008rnk.2	11532;11532	0;0	Unchanged	Unchanged	Unchanged
Adh7	118.431961489344	-1.13012396999167	0.270394883059294	-4.17953164351798	2.9211007345613e-05	0.000181933277641879	24857	chr3	138217736	138218565	830	*	5.9	6.06	5.72	-0.34	0.353	0.715	74.59	58.5	50.4	55	Promoter (<=1kb)	3	138217773	138232042	14270	1	11529	uc008rnd.2	0	ENSMUSG00000055301	alcohol dehydrogenase 7 (class IV), mu or sigma polypeptide	uc008rnd.2;uc008rnc.2	11529;68369	0;0	Unchanged	FGF_down	Unchanged
Adi1	178.584672628494	-0.718677712053848	0.21922554358599	-3.27825717887639	0.0010445018541702	0.0042665366237328	7811	chr12	28674491	28676890	2400	*	8.19	8.13	8.25	0.11	0.594	0.873	314	248.2	303.35	304	Promoter (<=1kb)	12	28675207	28682175	6969	1	104923	uc007nfv.2	0	ENSMUSG00000020629	acireductone dioxygenase 1	uc033gcx.1;uc007nfv.2	102465980;104923	-2435;0	Unchanged	FGF_down	Unchanged
Adipor1	1210.06729338955	0.271718016275649	0.127142162715135	2.13711966568038	0.0325882598271814	0.077983011086733	1276	chr1	134414256	134416473	2218	*	8.19	8.21	8.17	-0.04	0.857	0.964	341.62	251.55	262.46	314	Promoter (<=1kb)	1	134415378	134433351	17974	1	72674	uc007crx.3	0	ENSMUSG00000026457	adiponectin receptor 1	uc007cru.1;uc007crv.1;uc007crw.1;uc007crx.3;uc007cry.3	72017;72017;72017;72674;72674	0;0;0;0;0	Unchanged	Unchanged	Unchanged
Adk	215.161492672034	-0.0304823534560632	0.223856720941356	-0.136169034049456	0.891687654367898	0.933555732154914	11049	chr14	21051004	21053716	2713	*	8.45	8.56	8.34	-0.22	0.291	0.658	417.13	338.46	291.94	356	Promoter (<=1kb)	14	21052574	21053921	1348	1	11534	uc007slb.2	0	ENSMUSG00000039197	adenosine kinase	uc007slb.2;uc007slc.2;uc007sld.2;uc007sla.2	11534;11534;11534;55946	0;0;0;0	Unchanged	Unchanged	Unchanged
Adnp	26.7633661872878	0.309194486031414	0.387984360708026	0.796925127258146	0.425494516660713	0.571277293094679	23014	chr2	168205628	168208220	2593	*	8.3	8.3	8.29	-0.01	0.973	0.994	375.7	255.73	300.5	327	Promoter (<=1kb)	2	168180965	168207112	26148	2	11538	uc008oaq.2	0	ENSMUSG00000051149	activity-dependent neuroprotective protein	uc008oar.1;uc008oaq.2;uc057bpe.1;uc057bpf.1;uc008oas.1;uc057bph.1	105980075;11538;11538;11538;13480;13480	0;0;0;0;0;0	Unchanged	Unchanged	Unchanged
Adnp2	303.4427364681	-0.387123408188421	0.158508812970445	-2.44228318245372	0.0145946933883828	0.0403319711856533	18540	chr18	80149330	80151839	2510	*	8.04	8.19	7.87	-0.32	0.148	0.468	324.13	260.74	208.26	259	Promoter (<=1kb)	18	80127135	80151482	24348	2	240442	uc008fsk.1	0	ENSMUSG00000053950	ADNP homeobox 2	uc008fsk.1	240442	0	Unchanged	FGF_down	Unchanged
Ado	1729.28438459812	-0.036720502272147	0.112196225804788	-0.327288213206367	0.743449906477446	0.835559426040725	3179	chr10	67546625	67550257	3633	*	9.85	9.65	10.03	0.38	0.0556	0.26	953.05	655.19	1040.33	1053	Promoter (<=1kb)	10	67544511	67548955	4445	2	211488	uc007flz.2	0	ENSMUSG00000057134	2-aminoethanethiol (cysteamine) dioxygenase	uc007flx.1;uc007fly.2;uc007flz.2	13654;13654;211488	0;0;0	Unchanged	Unchanged	Unchanged
Adora2b	104.03403218389	1.09719663017053	0.339925301095889	3.22775805929499	0.0012476444871434	0.00498224086546538	5481	chr11	62249025	62249441	417	*	3.75	3.81	3.68	-0.13	0.861	0.965	13.81	14.21	6.66	19	Promoter (<=1kb)	11	62248984	62266452	17469	1	11541	uc007jio.1	41	ENSMUSG00000018500	adenosine A2b receptor	uc007jio.1	11541	0	Unchanged	FGF_up	Unchanged
Adprh	1181.82779792289	-0.0834147876075035	0.16382275368755	-0.509177057093032	0.610628123167843	0.731128670948299	15094	chr16	38451176	38453577	2402	*	8.19	8.02	8.35	0.32	0.132	0.439	294.66	225.64	314.76	336	Promoter (<=1kb)	16	38445399	38452689	7291	2	11544	uc007zex.1	0	ENSMUSG00000002844	ADP-ribosylarginine hydrolase	uc007zex.1;uc007zez.2	11544;12519	0;-1984	Unchanged	Unchanged	Unchanged
Adprhl2	249.005337164049	-0.498173945202476	0.168953017619803	-2.9485945395987	0.00319222485491564	0.0111559858087578	26475	chr4	126320494	126321780	1287	*	7.69	7.62	7.76	0.15	0.507	0.827	202.58	189.71	216.81	217	Promoter (<=1kb)	4	126316351	126321703	5353	2	100206	uc008ute.1	0	ENSMUSG00000042558	ADP-ribosylhydrolase like 2	uc008ute.1;uc008utf.1	100206;24084	0;3423	Unchanged	FGF_down	Unchanged
Adrm1	609.100570042795	0.52659852525271	0.126521909216075	4.16211333290412	3.15315778337664e-05	0.000195469615284842	23149	chr2	180171546	180172883	1338	*	7.58	7.66	7.5	-0.16	0.532	0.842	237.57	167.14	169.27	194	Promoter (<=1kb)	2	180171588	180176283	4696	1	56436	uc008oin.1	0	ENSMUSG00000039041	adhesion regulating molecule 1	uc012clx.1;uc008oip.1;uc008oin.1;uc008oio.1	16776;16776;56436;56436	17360;0;0;0	Unchanged	FGF_up	Unchanged
Adsl	767.960538509413	0.0852430720123652	0.139768206636392	0.609888858588031	0.541935433396052	0.674147824724148	13610	chr15	80947988	80949426	1439	*	6.92	7	6.84	-0.16	0.576	0.865	154.7	101.12	106.51	122	Promoter (<=1kb)	15	80948490	80970947	22458	1	11564	uc007wvz.2	0	ENSMUSG00000022407	adenylosuccinate lyase	uc007wvz.2	11564	0	Unchanged	Unchanged	Unchanged
Adss	583.653067041152	0.152772663841407	0.151703899522637	1.00704506820282	0.31391311697864	0.460298070681966	1969	chr1	177794530	177796576	2047	*	8.34	8.34	8.35	0.01	0.958	0.991	345.31	300.85	316.66	334	Promoter (<=1kb)	1	177763178	177796509	33332	2	11566	uc007dut.1	0	ENSMUSG00000015961	adenylosuccinate synthetase, non muscle	uc007dut.1;uc007duu.1	11566;11566	0;0	Unchanged	Unchanged	Unchanged
Adssl1	142.197278307077	-0.375819273161121	0.202185047148918	-1.85878866147957	0.0630571002602157	0.132850072679376	9131	chr12	112618918	112621184	2267	*	7.26	7.2	7.32	0.12	0.612	0.88	163.91	129.53	155.95	164	Promoter (<=1kb)	12	112620047	112641355	21309	1	11565	uc007peu.2	0	ENSMUSG00000011148	adenylosuccinate synthetase like 1	uc007peu.2;uc011yvf.1;uc007pes.1;uc007pet.1	11565;11565;70435;70435	0;0;0;14904	Unchanged	Unchanged	Unchanged
Aebp1	17565.8035662556	0.208983044651343	0.17365231704403	1.20345670134856	0.228799637211208	0.363115971131326	4600	chr11	5858682	5863779	5098	*	9.7	9.62	9.78	0.16	0.401	0.754	906.09	666.06	886.27	870	Promoter (<=1kb)	11	5861866	5872248	10383	1	11568	uc007hxg.3	0	ENSMUSG00000020473	AE binding protein 1	uc007hxg.3;uc007hxh.3;uc007hxj.3	11568;11568;11568	0;0;-3822	Unchanged	Unchanged	Unchanged
Aebp2	1906.37887363174	1.12697196918332	0.164875564523325	6.83528800912086	8.18404391996862e-12	1.72210726992016e-10	32418	chr6	140619267	140626516	7250	*	9.94	9.66	10.17	0.51	0.0052	0.0514	907.93	713.69	1096.43	1208	Promoter (<=1kb)	6	140622663	140655481	32819	1	11569	uc009eoi.1	0	ENSMUSG00000030232	AE binding protein 2	uc009eoi.1;uc009eoj.2;uc009eok.3;uc009eol.2;uc057byq.1	11569;11569;11569;11569;11569	0;0;0;0;-369	Unchanged	FGF_up	Unchanged
Aen	686.776109231354	0.218344957035069	0.147623869178187	1.47906268986568	0.139123560735436	0.249197409024612	33901	chr7	78895906	78897415	1510	*	7.76	7.66	7.86	0.2	0.387	0.744	232.05	171.32	231.08	232	Promoter (<=1kb)	7	78895927	78908833	12907	1	68048	uc009hxp.1	0	ENSMUSG00000030609	apoptosis enhancing nuclease	uc009hxp.1;uc009hxq.1;uc009hxr.1	68048;68048;68048	0;0;0	Unchanged	Unchanged	Unchanged
Aes	3710.76918654652	0.196928706455019	0.15699488557511	1.2543638331505	0.209709791952675	0.340088389880376	3611	chr10	81558838	81563561	4724	*	8.16	7.9	8.38	0.49	0.0195	0.131	259.67	216.45	339.49	327	Promoter (<=1kb)	10	81559444	81566371	6928	1	14797	uc007gim.2	0	ENSMUSG00000054452	amino-terminal enhancer of split	uc007gim.2;uc011xjj.2;uc033fro.1;uc007gin.2	14797;14797;14797;14797	0;0;0;0	Unchanged	Unchanged	Unchanged
AF357399	13.3645117348266	0.908286740946362	0.55216092603087	1.64496743272917	0.0999765273335655	0.191924101299514	33121	chr7	28349648	28352438	2791	*	8.46	8.58	8.32	-0.26	0.202	0.55	427.26	338.46	308.1	330	Promoter (<=1kb)	7	28351540	28351633	94	1	100302567	uc012fgs.1	0	NA	snoRNA AF357399	uc012fgs.1;uc012fgr.1	100302567;20055	0;0	Unchanged	Unchanged	Unchanged
Afap1	377.071907167155	0.0998414874644677	0.195031970581145	0.511923697263406	0.60870441246299	0.730031147808678	28164	chr5	35893416	35894502	1087	*	5.9	6.17	5.56	-0.61	0.104	0.382	86.56	57.66	47.55	47	Promoter (<=1kb)	5	35893319	36003922	110604	1	70292	uc008xej.1	97	ENSMUSG00000029094	actin filament associated protein 1	uc008xej.1	70292	0	Unchanged	Unchanged	Unchanged
Afap1l2	68.0311063590985	-1.98898187953119	0.366127335758439	-5.43248669321829	5.5574099089709e-08	6.34404615396564e-07	19929	chr19	57012838	57013162	325	*	3.32	1.97	4.01	2.03	0.0219	0.142	3.68	4.18	15.22	17	Distal Intergenic	19	56942475	57008575	66101	2	226250	uc008hzo.2	-4263	ENSMUSG00000025083	actin filament associated protein 1-like 2	uc008hzm.2;uc008hzn.2;uc012bnu.1;uc012bnv.1;uc008hzo.2	226250;226250;226250;226250;226250	0;0;0;0;0	Unchanged	FGF_down	Unchanged
Aff1	889.474464966417	0.617366911352998	0.180920006498784	3.41237502308595	0.000643994491748023	0.00279288562905167	28734	chr5	103752252	103755298	3047	*	8.6	8.55	8.65	0.1	0.609	0.879	395.95	354.34	384.18	419	Promoter (<=1kb)	5	103754162	103855322	101161	1	17355	uc008yjt.1	0	ENSMUSG00000029313	AF4/FMR2 family, member 1	uc008yjs.1;uc008yjt.1;uc008yju.1	17355;17355;17355	0;0;0	Unchanged	FGF_up	Unchanged
Aff4	1986.49060125723	0.46017074888676	0.15006308611202	3.06651529572869	0.00216569727487432	0.00796443502439934	5179	chr11	53350109	53352635	2527	*	8.89	8.84	8.93	0.09	0.655	0.901	529.47	387.77	476.42	500	Promoter (<=1kb)	11	53350767	53421830	71064	1	93736	uc007ivu.2	0	ENSMUSG00000049470	AF4/FMR2 family, member 4	uc007ivu.2;uc011xuq.1	93736;93736	0;0	Unchanged	FGF_up	Unchanged
Afg3l1	1176.71814340722	0.00578683697136976	0.114802709278692	0.0504067979556282	0.959798219289617	0.977046956558173	37372	chr8	123476963	123479533	2571	*	8.13	8	8.26	0.26	0.213	0.565	274.4	237.34	295.74	316	Promoter (<=1kb)	8	123477862	123481293	3432	1	114896	uc009nwc.2	0	ENSMUSG00000031967	AFG3-like AAA ATPase 1	uc009nwc.2;uc009nwd.2;uc009nwe.2	114896;114896;114896	0;0;0	Unchanged	Unchanged	Unchanged
Afg3l2	2491.01555423891	-0.106915443196908	0.118301857711368	-0.903751177413967	0.36612735537167	0.512106980854559	18259	chr18	67448099	67449177	1079	*	7.63	7.48	7.77	0.28	0.244	0.602	212.71	145.41	210.16	226	Promoter (<=1kb)	18	67404764	67449136	44373	2	69597	uc008fmf.1	0	ENSMUSG00000024527	AFG3-like AAA ATPase 2	uc008fmf.1;uc008fmh.1	69597;69597	0;0	Unchanged	Unchanged	Unchanged
Aftph	430.249389884763	0.609837867697203	0.160877696389588	3.7906924414208	0.000150227884555186	0.000786131206744124	4784	chr11	20740105	20742658	2554	*	8.57	8.39	8.72	0.32	0.11	0.396	366.49	306.7	382.28	461	Promoter (<=1kb)	11	20685084	20741556	56473	2	216549	uc007idh.4	0	ENSMUSG00000049659	aftiphilin	uc007idh.4;uc011xry.4;uc056yjx.2;uc007idi.3	216549;216549;216549;216549	0;0;0;0	Unchanged	FGF_up	Unchanged
Aga	391.934525276983	-0.0389754082258466	0.174049508478771	-0.223932883042875	0.822809528421027	0.890055161886877	35983	chr8	53511728	53512646	919	*	6.45	6.57	6.31	-0.26	0.412	0.763	108.66	81.06	78.93	80	Promoter (<=1kb)	8	53511798	53523422	11625	1	11593	uc012gdv.1	0	ENSMUSG00000031521	aspartylglucosaminidase	uc009lrz.2;uc012gdu.2;uc012gdv.1	11593;11593;11593	0;0;0	Unchanged	Unchanged	Unchanged
Agap1	414.706169483402	-0.992076948323126	0.17569593855634	-5.64655595612985	1.63693903128956e-08	2.05944161073398e-07	884	chr1	89454857	89455792	936	*	5.13	5.54	4.55	-1	0.0323	0.184	51.57	41.79	22.82	24	Promoter (<=1kb)	1	89454811	89895282	440472	1	347722	uc007byw.1	46	ENSMUSG00000055013	ArfGAP with GTPase domain, ankyrin repeat and PH domain 1	uc007byw.1;uc007byx.1	347722;347722	0;0	Unchanged	FGF_down	Unchanged
Agap2	88.9997040092084	-0.266438076878379	0.365871431741233	-0.728228699383175	0.466473600379385	0.609254996364814	4287	chr10	127078427	127079344	918	*	4.7	4.76	4.63	-0.12	0.825	0.955	34.07	20.06	25.68	24	Promoter (<=1kb)	10	127078907	127093170	14264	1	216439	uc007hhx.2	0	ENSMUSG00000025422	ArfGAP with GTPase domain, ankyrin repeat and PH domain 2	uc007hhx.2;uc007hhy.2	216439;216439	0;0	Unchanged	Unchanged	Unchanged
Agap3	511.894214890751	-0.316772303432471	0.158561354441386	-1.99779009550255	0.0457394215876855	0.102412432899216	27827	chr5	24451262	24453618	2357	*	7.58	7.49	7.66	0.17	0.541	0.846	221	139.56	168.32	236	Promoter (<=1kb)	5	24452177	24483184	31008	1	213990	uc008wru.2	0	ENSMUSG00000023353	ArfGAP with GTPase domain, ankyrin repeat and PH domain 3	uc008wru.2;uc008wrv.1;uc008wrt.2	213990;213990;64295	0;0;0	Unchanged	Unchanged	Unchanged
Agbl2	20.577198475802	-1.46766127937277	0.456275642083759	-3.21661106578061	0.00129714314947388	0.00515236122383244	21343	chr2	90781021	90783681	2661	*	7.37	7.27	7.47	0.2	0.444	0.786	182.32	126.19	151.2	204	Promoter (<=1kb)	2	90782744	90810763	28020	1	271813	uc008ktc.2	0	ENSMUSG00000040812	ATP/GTP binding protein-like 2	uc008ktc.2;uc008ktd.2;uc008kte.2;uc008ktg.2;uc008kth.2;uc012byz.1;uc012bza.1;uc008ktj.1;uc008ktk.1;uc008ktb.2	271813;271813;271813;271813;271813;271813;271813;271813;271813;55935	0;0;0;0;0;0;0;0;0;0	Unchanged	FGF_down	Unchanged
Agbl3	44.3288636841018	0.133542387959615	0.334698123443345	0.398993536580792	0.689897966741829	0.795748462021236	30816	chr6	34779903	34781795	1893	*	8.84	8.75	8.93	0.18	0.341	0.705	463.17	396.96	481.17	492	Promoter (<=1kb)	6	34780432	34785710	5279	1	76223	uc009bhm.2	0	ENSMUSG00000038836	ATP/GTP binding protein-like 3	uc057lpk.1;uc009bhk.1;uc009bhm.2;uc009bhn.1;uc009bho.1;uc009bhp.1;uc009bhq.1;uc009bhr.2;uc009bhs.2;uc012eju.2	109624;109624;76223;76223;76223;76223;76223;76223;76223;76223	0;0;0;0;0;0;0;0;0;0	Unchanged	Unchanged	Unchanged
Agbl5	113.010372091021	-0.504438118913192	0.218799239602812	-2.30548387567024	0.0211394887827748	0.0547473824337431	27934	chr5	30888185	30890011	1827	*	7.62	7.53	7.71	0.18	0.459	0.796	209.03	161.29	192.09	226	Promoter (<=1kb)	5	30888852	30896687	7836	1	231093	uc008wwc.1	0	ENSMUSG00000029165	ATP/GTP binding protein-like 5	uc008wwc.1;uc008wwe.2;uc008wwf.2;uc008wwg.2;uc008wwh.2;uc008wwi.2;uc008wwd.1;uc008wwj.2	231093;231093;231093;231093;231093;231093;231093;231093	0;0;0;0;0;0;0;0	Unchanged	Unchanged	Unchanged
Agfg1	2.22616459513387	-0.494800096308661	1.24275717851256	-0.398147043415901	0.690521799059886	0.796018185027369	745	chr1	82838862	82840607	1746	*	7.18	7.01	7.34	0.33	0.174	0.509	131.68	125.36	158.81	165	Promoter (<=1kb)	1	82839460	82901001	61542	1	15463	uc007bse.2	0	ENSMUSG00000026159	ArfGAP with FG repeats 1	uc007bse.2;uc007bsf.2;uc007bsg.2;uc057kfv.1	15463;15463;15463;15463	0;0;0;0	Unchanged	Unchanged	Unchanged
Agfg2	490.008994635857	-0.507360029716156	0.199187448006465	-2.54714860195251	0.0108607173490256	0.031560246475943	29851	chr5	137682961	137684718	1758	*	7.19	7.17	7.2	0.03	0.914	0.979	174.04	114.49	134.08	160	Promoter (<=1kb)	5	137650463	137684753	34291	2	231801	uc009adl.3	35	ENSMUSG00000029722	ArfGAP with FG repeats 2	uc009adl.3;uc009adm.3;uc009adn.3;uc009ado.3	231801;231801;231801;231801	0;0;0;0	Unchanged	FGF_down	Unchanged
Aggf1	871.427654241694	0.282338069819318	0.161565640330339	1.74751308039288	0.0805483779609505	0.161312703315898	10513	chr13	95374576	95376054	1479	*	7.13	6.97	7.28	0.31	0.238	0.594	143.65	106.97	142.64	168	Promoter (<=1kb)	13	95350683	95375357	24675	2	66549	uc007rmi.2	0	ENSMUSG00000021681	angiogenic factor with G patch and FHA domains 1	uc007rmi.2;uc007rmj.2	66549;66549	0;0	Unchanged	Unchanged	Unchanged
Agk	365.5811795057	0.0247639408670046	0.150495804555737	0.164549044673422	0.869298940810535	0.919619484914809	30963	chr6	40324540	40326120	1581	*	7.95	8.02	7.87	-0.15	0.483	0.812	288.22	231.49	232.03	235	Promoter (<=1kb)	6	40325478	40349456	23979	1	69923	uc009bml.2	0	ENSMUSG00000029916	acylglycerol kinase	uc009bml.2;uc009bmm.2;uc009bmn.2	69923;69923;69923	0;0;0	Unchanged	Unchanged	Unchanged
Agl	618.979723548002	-0.14420095993354	0.155494616525727	-0.927369468830979	0.353734736948744	0.499213316331489	24567	chr3	116807337	116809011	1675	*	7.12	7.24	6.98	-0.26	0.325	0.691	174.96	127.86	122.67	130	Promoter (<=1kb)	3	116739999	116808166	68168	2	77559	uc008rcq.1	0	ENSMUSG00000033400	amylo-1,6-glucosidase, 4-alpha-glucanotransferase	uc008rcq.1;uc012cwu.1;uc008rcs.1;uc008rcu.1	77559;77559;77559;77559	0;0;0;0	Unchanged	Unchanged	Unchanged
Ago1	524.942144440274	-0.767276115749782	0.186353824489475	-4.11730812529215	3.83323431385214e-05	0.000233272996533405	26479	chr4	126467707	126468642	936	*	6.11	5.87	6.32	0.45	0.173	0.509	61.7	55.16	74.17	86	Promoter (<=1kb)	4	126435012	126468583	33572	2	236511	uc008utj.4	0	ENSMUSG00000041530	argonaute RISC catalytic subunit 1	uc008utj.4;uc012dle.3	236511;236511	0;0	Unchanged	FGF_down	Unchanged
Ago2	767.266702035907	0.655200985040696	0.146580612253412	4.46990208983416	7.82554122571176e-06	5.57062946573597e-05	13209	chr15	73182779	73185670	2892	*	8.49	8.46	8.52	0.06	0.793	0.946	418.97	286.65	345.19	389	Promoter (<=1kb)	15	73101625	73184947	83323	2	239528	uc007wbu.2	0	ENSMUSG00000036698	argonaute RISC catalytic subunit 2	uc007wbu.2	239528	0	Unchanged	FGF_up	Unchanged
Ago3	100.062002006192	0.433314511390347	0.253927847651479	1.7064473841604	0.0879248147276669	0.173126422672994	26477	chr4	126428688	126431764	3077	*	8.03	8	8.05	0.05	0.804	0.948	266.12	245.7	267.21	263	Promoter (<=1kb)	4	126340678	126429542	88865	2	214150	uc008uth.2	0	ENSMUSG00000028842	argonaute RISC catalytic subunit 3	uc008uth.2;uc012dlc.1;uc012dld.1;uc008uti.2;uc008utj.4;uc012dle.3	214150;214150;214150;214150;236511;236511	0;0;0;0;0;0	Unchanged	Unchanged	Unchanged
Agpat1	783.35735575577	0.230542987809649	0.14495317665346	1.59046523251303	0.11172997649686	0.209671326596087	16425	chr17	34604239	34607009	2771	*	8.48	8.35	8.6	0.26	0.227	0.582	374.77	276.62	368.96	409	Promoter (<=1kb)	17	34605861	34613449	7589	1	55979	uc008ccz.2	0	ENSMUSG00000034254	1-acylglycerol-3-phosphate O-acyltransferase 1 (lysophosphatidic acid acyltransferase, alpha)	uc008ccw.3;uc012aqe.2;uc033hcv.1;uc008ccx.2;uc012aqf.2;uc012aqg.2;uc012aqh.2;uc012aqi.2;uc008ccy.1;uc008ccz.2;uc008cda.1	11596;11596;11596;11596;11596;11596;11596;11596;54197;55979;55979	6389;6389;6389;6389;6389;6389;6389;4243;0;0;-2005	Unchanged	Unchanged	Unchanged
Agpat3	1033.4441342255	-0.0284215651750508	0.150042862970928	-0.189422972957786	0.849761320574168	0.906206384501676	3382	chr10	78297157	78299572	2416	*	6.99	6.87	7.11	0.24	0.351	0.713	123.39	110.31	148.35	128	Promoter (<=1kb)	10	78271563	78298198	26636	2	28169	uc007fxp.1	0	ENSMUSG00000001211	1-acylglycerol-3-phosphate O-acyltransferase 3	uc007fxo.1;uc007fxp.1;uc007fxq.1;uc007fxr.1	28169;28169;28169;28169	-1761;0;0;0	Unchanged	Unchanged	Unchanged
Agpat4	1409.3874485872	0.255120755980079	0.159688585449803	1.59761422684951	0.110128858243455	0.207317705737246	15748	chr17	12117972	12124138	6167	*	9.63	9.62	9.65	0.03	0.889	0.972	867.41	707.84	758.85	844	Promoter (<=1kb)	17	12119284	12219640	100357	1	68262	uc008akm.1	0	ENSMUSG00000023827	1-acylglycerol-3-phosphate O-acyltransferase 4 (lysophosphatidic acid acyltransferase, delta)	uc008akm.1	68262	0	Unchanged	Unchanged	Unchanged
Agpat5	1168.81067396531	-0.0888440625686167	0.164473142221725	-0.540173680447151	0.589077261759227	0.714351809308673	35568	chr8	18845380	18847309	1930	*	7.5	7.6	7.4	-0.19	0.464	0.799	234.81	152.1	152.15	186	Promoter (<=1kb)	8	18846279	18884413	38135	1	52123	uc009kzv.1	0	ENSMUSG00000031467	1-acylglycerol-3-phosphate O-acyltransferase 5 (lysophosphatidic acid acyltransferase, epsilon)	uc009kzv.1;uc012gaf.1	52123;52123	0;0	Unchanged	Unchanged	Unchanged
Agps	821.334392714276	0.445301166221182	0.145274147003552	3.06524715791512	0.0021749018455805	0.00799223193161455	21220	chr2	75831919	75833079	1161	*	6.81	6.67	6.94	0.27	0.317	0.682	107.74	96.11	116.97	129	Promoter (<=1kb)	2	75832177	75895178	63002	1	228061	uc008kes.2	0	ENSMUSG00000042410	alkylglycerone phosphate synthase	uc008kes.2;uc008ket.2	228061;228061	0;0	Unchanged	FGF_up	Unchanged
Agrn	5703.48461099714	-0.16531653395363	0.169947786105737	-0.97274897038538	0.330678080226746	0.477038063400588	27610	chr4	156196397	156198828	2432	*	7.55	7.6	7.5	-0.09	0.729	0.928	237.57	149.59	171.17	192	Promoter (<=1kb)	4	156165290	156197488	32199	2	11603	uc008wgf.2	0	ENSMUSG00000041936	agrin	uc012dri.1;uc008wgl.2;uc008wgf.2;uc008wgi.1	100038882;100382;11603;11603	0;0;0;0	Unchanged	Unchanged	Unchanged
Agt	2566.18769483819	0.0856803571075714	0.203664094189786	0.420694464816806	0.673978203566961	0.784129713314693	37402	chr8	124569329	124569828	500	*	3.96	4.2	3.66	-0.54	0.421	0.77	18.42	18.39	12.36	13	Promoter (<=1kb)	8	124556587	124569707	13121	2	11606	uc009nxe.1	0	ENSMUSG00000031980	angiotensinogen (serpin peptidase inhibitor, clade A, member 8)	uc009nxe.1	11606	0	Unchanged	Unchanged	Unchanged
Agtpbp1	150.906906026167	0.130583446309925	0.206667201877562	0.631853749039906	0.527482447983291	0.661737228937439	10137	chr13	59556477	59557352	876	*	6.19	6.08	6.29	0.21	0.53	0.84	78.27	56.83	68.47	88	Promoter (<=1kb)	13	59449535	59556922	107388	2	67269	uc007qum.1	0	ENSMUSG00000021557	ATP/GTP binding protein 1	uc007qum.1;uc007qun.2;uc007qup.2;uc007quq.3;uc007qur.3;uc011zar.2;uc007qus.2	67269;67269;67269;67269;67269;67269;67269	0;0;0;0;0;0;0	Unchanged	Unchanged	Unchanged
Agtrap	563.379222222642	-0.64095379438349	0.135236452614119	-4.73950463794236	2.14241331769028e-06	1.7419131954445e-05	27268	chr4	148086728	148088372	1645	*	6.7	6.82	6.58	-0.24	0.46	0.797	141.81	83.57	87.49	104	Promoter (<=1kb)	4	148077061	148088064	11004	2	11610	uc008vtz.1	0	ENSMUSG00000029007	angiotensin II, type I receptor-associated protein	uc008vtz.1;uc056zyk.1	11610;11610	0;0	Unchanged	FGF_down	Unchanged
Ahctf1	1545.96772795058	0.300487333954508	0.119573889773924	2.51298451963579	0.0119714587931271	0.0341079560179868	2033	chr1	179802003	179804390	2388	*	7.77	7.86	7.68	-0.18	0.462	0.798	267.04	197.23	182.58	228	Promoter (<=1kb)	1	179744904	179804015	59112	2	226747	uc011wxn.1	0	ENSMUSG00000026491	AT hook containing transcription factor 1	uc011wxn.1	226747	0	Unchanged	FGF_up	Unchanged
Ahcy	567.28171819072	-0.0921832416253738	0.177976082090302	-0.517952977404017	0.604491077812647	0.726921960158643	22573	chr2	155073357	155075609	2253	*	8.41	8.35	8.47	0.12	0.597	0.874	380.3	272.44	328.07	379	Promoter (<=1kb)	2	155059310	155074497	15188	2	269378	uc008nka.3	0	ENSMUSG00000027597	S-adenosylhomocysteine hydrolase	uc008nka.3	269378	0	Unchanged	Unchanged	Unchanged
Ahcyl2	33.2817665629515	0.491616912388233	0.38029345824793	1.29273039471462	0.196104321536987	0.323154398319326	30643	chr6	29767110	29769747	2638	*	8.84	8.82	8.87	0.05	0.815	0.951	510.14	393.62	446.94	486	Promoter (<=1kb)	6	29768443	29867419	98977	1	74340	uc009beg.2	0	ENSMUSG00000029772	S-adenosylhomocysteine hydrolase-like 2	uc009beg.2;uc012ejf.1;uc009beh.2;uc009bei.2	74340;74340;74340;74340	0;0;0;0	Unchanged	Unchanged	Unchanged
Ahdc1	543.005252754936	-0.956485227843979	0.189204346145058	-5.05530262561024	4.29708830976807e-07	4.12189401912905e-06	26722	chr4	133011047	133014832	3786	*	8.19	8.22	8.16	-0.06	0.824	0.954	370.17	226.48	258.66	315	Promoter (<=1kb)	4	133011506	133066277	54772	1	230793	uc008vcc.1	0	ENSMUSG00000037692	AT hook, DNA binding motif, containing 1	uc008vcc.1;uc008vcd.1;uc008vce.1	230793;230793;230793	0;0;0	Unchanged	FGF_down	Unchanged
Ahnak	23260.8149497104	1.41912432028587	0.218085090461192	6.50720467540812	7.65620665715092e-11	1.37811719828717e-09	18979	chr19	8987893	8992956	5064	*	9.17	9.21	9.12	-0.09	0.6	0.875	602.22	584.99	564.86	549	Promoter (<=1kb)	19	8989284	9019196	29913	1	66395	uc008goj.2	0	ENSMUSG00000069833	AHNAK nucleoprotein (desmoyokin)	uc008goj.2;uc008gok.2;uc008gol.2;uc012bii.2	66395;66395;66395;66395	0;0;0;0	Unchanged	FGF_up	Unchanged
Ahsa2	435.650231170555	0.285500490186563	0.155613858645546	1.83467264851307	0.0665542072678049	0.138605311947169	4853	chr11	23496805	23497982	1178	*	7.07	7.01	7.13	0.12	0.648	0.896	149.17	108.64	130.28	150	Promoter (<=1kb)	11	23487882	23498039	10158	2	268390	uc007ifb.2	57	ENSMUSG00000020288	AHA1, activator of heat shock protein ATPase 2	uc007ifb.2;uc007ifc.2;uc056ykb.1	268390;268390;268390	0;0;0	Unchanged	Unchanged	Unchanged
AI413582	93.9976775135936	-0.1821284153304	0.248440986821991	-0.733085219392142	0.463506454441852	0.606506365610796	16137	chr17	27563649	27566758	3110	*	7.93	7.63	8.17	0.54	0.0179	0.124	230.21	166.31	297.64	279	Promoter (<=1kb)	17	27563769	27565727	1959	2	106672	uc008bpe.1	0	ENSMUSG00000062753	expressed sequence AI413582	uc008bpe.1;uc008bpf.1;uc008boy.2;uc008boz.2;uc008bpb.2;uc008bpd.2;uc012anw.1;uc012anx.1;uc012any.1;uc012anz.1;uc012aoa.1;uc012aob.1;uc012aoc.1;uc012aod.1;uc008bpa.2;uc008bpc.2	106672;106672;15361;15361;15361;15361;15361;15361;15361;15361;15361;15361;15361;15361;15361;15361	0;0;0;0;0;0;0;0;0;0;0;0;0;0;0;0	Unchanged	Unchanged	Unchanged
AI429214	42.4593184183128	-1.55383843281062	0.473046040962708	-3.28475095077082	0.00102072553307935	0.00417798341485082	35882	chr8	36992186	36994433	2248	*	6.32	6.48	6.13	-0.35	0.273	0.637	89.32	89.42	58.01	82	Promoter (<=1kb)	8	36993575	36995533	1959	1	621080	uc009llx.2	0	ENSMUSG00000074384	expressed sequence AI429214	uc009llw.1;uc009llx.2	414128;621080	0;0	Unchanged	FGF_down	Unchanged
AI464131	148.388420393675	-1.11162482185446	0.208387246552534	-5.33441868561867	9.58511283813764e-08	1.04336310238088e-06	25355	chr4	41502366	41503044	679	*	5.11	4.88	5.32	0.44	0.343	0.706	31.31	27.58	45.65	34	Promoter (<=1kb)	4	41495601	41503075	7475	2	329828	uc008sit.2	31	ENSMUSG00000046312	expressed sequence AI464131	uc008sit.2;uc008siu.1;uc008siv.1;uc029uqf.1;uc029uqg.1;uc008six.1;uc008siy.1;uc029uqh.2;uc029uqi.1	329828;73721;73721;73721;73721;73721;73721;73721;73721	0;4720;4720;4720;4720;14289;14289;14289;14289	Unchanged	FGF_down	Unchanged
AI506816	451.183843537676	0.492262352612036	0.163466770134044	3.0113909524754	0.00260053790535503	0.00933382253597698	27780	chr5	23711277	23713596	2320	*	7.94	7.67	8.17	0.51	0.0258	0.158	235.73	171.32	295.74	282	Promoter (<=1kb)	5	23692261	23712667	20407	2	433855	uc029vgj.1	0	ENSMUSG00000105987	expressed sequence AI506816	uc029vgj.1;uc008wql.2;uc008wqm.2	433855;433855;433855	0;0;0	Unchanged	FGF_up	Unchanged
AI837181	346.045545468376	0.0650785001059474	0.151239377465852	0.430301295842357	0.666976484599994	0.777916452007019	18768	chr19	5425171	5426221	1051	*	7.41	7.41	7.41	0	1	1	201.66	137.89	150.25	189	Promoter (<=1kb)	19	5425144	5427317	2174	1	107242	uc008gda.3	27	ENSMUSG00000047423	expressed sequence AI837181	uc008gda.3;uc008gdb.3;uc008gcy.2;uc008gcz.2;uc056zhf.1;uc008gcx.3;uc012bgw.2	107242;107242;66556;66556;66556;74931;74931	0;0;0;0;0;0;0	Unchanged	Unchanged	Unchanged
AI839979	21.476116634359	0.0574589508542622	0.422720199485775	0.135926674249679	0.891879248173196	0.933672661309103	27967	chr5	31566072	31572875	6804	*	9.33	9.5	9.13	-0.37	0.0625	0.281	822.29	624.27	518.26	603	Promoter (<=1kb)	5	31569592	31571397	1806	2	100740	uc033iiq.1	0	NA	expressed sequence AI839979	uc033iiq.1	100740	0	Unchanged	Unchanged	Unchanged
AI987944	198.954051428159	1.09857435108564	0.302377266571868	3.63312481636096	0.000280009482430587	0.00135164512682164	33410	chr7	41392583	41393999	1417	*	6.71	6.69	6.72	0.02	0.928	0.982	107.74	99.45	100.8	110	Promoter (<=1kb)	7	41372930	41393379	20450	2	233168	uc009gll.2	0	ENSMUSG00000056383	expressed sequence AI987944	uc009gll.2;uc009glm.2;uc009gln.2	233168;233168;233168	0;0;0	Unchanged	FGF_up	Unchanged
Aida	266.051340556096	-0.0779949942490212	0.162648912645708	-0.479529761252783	0.631561801100692	0.748703297634941	2140	chr1	183296484	183298580	2097	*	8.31	8.17	8.44	0.27	0.238	0.594	336.1	240.68	310.01	384	Promoter (<=1kb)	1	183297060	183322989	25930	1	108909	uc008ict.1	0	ENSMUSG00000042901	axin interactor, dorsalization associated	uc008ict.1;uc012bom.1;uc008icu.2;uc008icq.1;uc008icr.1;uc008ics.1	108909;108909;108909;71678;71678;71678	0;0;0;0;0;0	Unchanged	Unchanged	Unchanged
Aif1l	278.21798015623	-0.727507910233021	0.21172092472088	-3.4361644282072	0.000590012766664329	0.00258782847235672	20613	chr2	31950256	31950746	491	*	4.5	4.48	4.52	0.04	0.935	0.984	29.47	15.04	22.82	23	Promoter (<=1kb)	2	31950303	31973442	23140	1	108897	uc008jeg.1	0	ENSMUSG00000001864	allograft inflammatory factor 1-like	uc008jeg.1;uc008jef.1;uc012btp.1	108897;23928;23928	0;62975;62975	Unchanged	FGF_down	Unchanged
Aifm1	2741.05039055804	-0.299755283406486	0.149710695134164	-2.00223025574665	0.0452599730775014	0.101662694648054	40106	chrX	48513619	48515436	1818	*	7.43	7.48	7.38	-0.1	0.683	0.912	199.82	157.95	157.86	176	Promoter (<=1kb)	20	48474944	48513563	38620	2	26926	uc057arf.1	-56	ENSMUSG00000036932	apoptosis-inducing factor, mitochondrion-associated 1	uc009tci.2;uc009tch.2;uc057arf.1	19337;26926;26926	0;0;0	Unchanged	Unchanged	Unchanged
Aifm2	162.643565695169	-0.609980884805407	0.19181229812128	-3.18009267799776	0.00147227957511657	0.00573555589367445	3108	chr10	61715321	61716238	918	*	5.79	5.45	6.07	0.62	0.0958	0.363	50.65	36.77	64.66	70	Promoter (<=1kb)	10	61715263	61738653	23391	1	71361	uc007fgi.3	58	ENSMUSG00000020085	apoptosis-inducing factor, mitochondrion-associated 2	uc007fgi.3;uc007fgj.3;uc007fgk.2;uc007fgl.2	71361;71361;71361;71361	0;0;0;-4411	Unchanged	FGF_down	Unchanged
Aig1	41.465859534085	1.7943509870209	0.416132816428359	4.31196703596149	1.61808561807849e-05	0.00010750060760019	2472	chr10	13867768	13870683	2916	*	8.28	7.82	8.62	0.8	6.76e-05	0.00185	240.33	212.27	401.3	388	Promoter (<=1kb)	10	13647669	13868830	221162	2	66253	uc007elb.2	0	ENSMUSG00000019806	androgen-induced 1	uc007elf.1;uc007elb.2;uc007elc.1;uc007ele.1	102634635;66253;66253;66253	-597;0;0;0	Unchanged	FGF_up	FGF_up
Aimp1	389.522402884534	-0.162905544441844	0.168220870584453	-0.968402695074983	0.332843294019249	0.479439601657944	24793	chr3	132683081	132684959	1879	*	7.96	7.92	8	0.08	0.726	0.927	283.61	202.24	279.58	234	Promoter (<=1kb)	3	132660498	132683879	23382	2	13722	uc008rjx.1	0	ENSMUSG00000028029	aminoacyl tRNA synthetase complex-interacting multifunctional protein 1	uc008rjx.1;uc008rjy.2;uc012cxw.2	13722;271981;271981	0;0;0	Unchanged	Unchanged	Unchanged
Aip	356.960463265335	0.160677972548	0.165988960624795	0.968003968114487	0.33304238793949	0.479554464355511	18672	chr19	4121077	4121871	795	*	6.48	6.47	6.49	0.02	0.954	0.99	88.4	89.42	72.27	108	Promoter (<=1kb)	19	4113756	4121575	7820	2	11632	uc008fyp.2	0	ENSMUSG00000024847	aryl-hydrocarbon receptor-interacting protein	uc008fyp.2;uc008fyq.2;uc008fyr.1;uc008fys.1;uc008fyt.1;uc008fyu.1	11632;11632;66990;66990;66990;66990	0;0;0;0;0;0	Unchanged	Unchanged	Unchanged
Airn	14.028392619891	-0.326715066633585	0.566905092391547	-0.57631351529284	0.564403289218276	0.694078414727527	15771	chr17	12740496	12742894	2399	*	7.18	7.35	6.97	-0.38	0.202	0.55	210.87	116.16	115.06	136	Promoter (<=1kb)	17	12741311	12815557	74247	1	104103	uc008akz.2	0	ENSMUSG00000078247	antisense Igf2r RNA	uc008akz.2;uc012akd.1;uc008ala.2;uc008alb.2;uc008aky.1	104103;104103;104103;104103;16004	0;0;0;0;0	Unchanged	Unchanged	Unchanged
Ajuba	23.9418743637806	-1.20943210124344	0.413585473495864	-2.92426155836814	0.00345274489994526	0.0119234923560086	11664	chr14	54571724	54573904	2181	*	7.18	7.46	6.83	-0.62	0.0176	0.122	201.66	149.59	120.77	107	Promoter (<=1kb)	14	54567469	54572082	4614	2	16475	uc007twi.2	0	ENSMUSG00000022178	ajuba LIM protein	uc007twi.2;uc007twj.2	16475;16475	0;0	Unchanged	FGF_down	Unchanged
Ak1	760.365520576598	0.444249675798943	0.192880101055894	2.30324265368466	0.0212651941793699	0.0550014284422916	20662	chr2	32628016	32629801	1786	*	7.49	7.05	7.83	0.78	0.00119	0.0171	150.09	114.49	237.73	217	Promoter (<=1kb)	2	32628390	32635058	6669	1	11636	uc012btw.1	0	ENSMUSG00000026817	adenylate kinase 1	uc008jgh.2;uc008jgi.2;uc012btw.1;uc008jgj.2	11636;11636;11636;11636	0;0;0;0	Unchanged	Unchanged	Unchanged
Ak3	602.964248653012	-0.727804393129028	0.14434039891711	-5.04227782789338	4.60022719937944e-07	4.39152679608491e-06	19320	chr19	29046333	29048584	2252	*	7.9	7.93	7.87	-0.06	0.806	0.949	271.64	215.61	235.83	233	Promoter (<=1kb)	19	29020832	29047902	27071	2	56248	uc008hcx.1	0	ENSMUSG00000024782	adenylate kinase 3	uc008hcx.1;uc008hcy.5	56248;67329	0;0	Unchanged	FGF_down	Unchanged
Ak6	62.8392252492484	6.44020523731705e-05	0.28563357487408	0.000225470876109581	0.999820100270566	0.999820100270566	10653	chr13	100650332	100652725	2394	*	8.19	8.1	8.28	0.17	0.449	0.79	328.73	220.63	290.99	329	Promoter (<=1kb)	13	100651343	100666415	15073	1	102216272	uc007rrg.3	0	ENSMUSG00000078941	adenylate kinase 6	uc007rrg.3;uc007rrf.2;uc007rrh.1;uc007rri.1;uc007rrc.2;uc007rrd.2;uc007rre.2	102216272;108143;108143;108143;19356;19356;19356	0;0;0;0;0;0;0	Unchanged	Unchanged	Unchanged
Akap1	2106.11830171244	-0.670826384570584	0.16237713981987	-4.13128587752409	3.60739618452747e-05	0.000221332644750884	6304	chr11	88863500	88864589	1090	*	6.35	6.47	6.22	-0.25	0.444	0.786	104.05	73.54	69.42	80	Promoter (<=1kb)	11	88830792	88864586	33795	2	11640	uc007kvw.1	0	ENSMUSG00000018428	A kinase (PRKA) anchor protein 1	uc007kvw.1;uc056yoc.1	11640;75285	0;0	Unchanged	FGF_down	Unchanged
Akap10	259.48763255454	0.265991698157144	0.160123806844886	1.66116271776385	0.0966807710595742	0.186797377255744	5462	chr11	61929220	61931711	2492	*	8.19	8.29	8.07	-0.23	0.314	0.679	365.57	262.41	269.12	268	Promoter (<=1kb)	11	61871307	61930257	58951	2	56697	uc007jii.2	0	ENSMUSG00000047804	A kinase (PRKA) anchor protein 10	uc007jii.2;uc007jik.2	56697;56697	0;0	Unchanged	Unchanged	Unchanged
Akap12	5646.18242563209	1.75879176192223	0.238305683408971	7.38040208174078	1.57812205432525e-13	4.17294575072906e-12	2339	chr10	4346398	4347912	1515	*	6.8	6.85	6.75	-0.11	0.696	0.916	124.31	106.97	103.65	111	Promoter (<=1kb)	10	4347768	4359471	11704	1	83397	uc007ehh.1	0	ENSMUSG00000038587	A kinase (PRKA) anchor protein (gravin) 12	uc007ehi.2;uc007ehh.1	83397;83397	0;0	Unchanged	FGF_up	Unchanged
Akap13	938.997935050331	0.48838914475451	0.177371813183884	2.7534766431473	0.00589659775645707	0.0187786134785971	33882	chr7	75455549	75456475	927	*	6.87	6.86	6.88	0.02	0.944	0.987	139.96	92.76	98.9	137	Promoter (<=1kb)	7	75455868	75580376	124509	1	75547	uc009hwp.1	0	ENSMUSG00000066406	A kinase (PRKA) anchor protein 13	uc009hwo.2;uc009hwx.2;uc009hwp.1	75547;75547;75547	0;0;0	Unchanged	FGF_up	Unchanged
Akap17b	72.6823861054569	-1.39055319814337	0.264812654605515	-5.25108288429358	1.51207616047973e-07	1.58807858260577e-06	40038	chrX	36644722	36645395	674	*	5.33	5.1	5.53	0.43	0.322	0.688	30.39	38.44	48.5	44	Promoter (<=1kb)	20	36608183	36645414	37232	2	338351	uc009sxp.1	19	ENSMUSG00000059708	A kinase (PRKA) anchor protein 17B	uc009sxp.1;uc012hft.1	338351;338351	0;0	Unchanged	FGF_down	Unchanged
Akap2	2.15354418929509	1.88737282688346	1.43457615362057	1.31563097721939	0.188297931152123	0.313136592797864	25639	chr4	57843964	57846381	2418	*	7.5	7.57	7.42	-0.15	0.523	0.837	210.87	170.48	169.27	174	Promoter (<=1kb)	4	57845248	57896984	51737	1	11641	uc008syj.2	0	ENSMUSG00000038729	A kinase (PRKA) anchor protein 2	uc008syj.2;uc008syk.2;uc056zwc.1	11641;11641;677884	0;0;0	Unchanged	Unchanged	Unchanged
Akap6	50.2967661346929	-3.44851058711458	0.407191993635547	-8.4690039121966	2.47500365773687e-17	1.05647298990254e-15	8053	chr12	52853457	52855445	1989	*	6.32	6.58	6	-0.58	0.126	0.429	131.68	59.34	62.76	65	Promoter (<=1kb)	12	52854721	52888063	33343	1	238161	uc007nnn.1	0	ENSMUSG00000061603	A kinase (PRKA) anchor protein 6	uc007nnm.1;uc011ylu.1;uc007nnn.1	238161;238161;238161	0;0;0	Unchanged	FGF_down	Unchanged
Akap7	43.6846170549545	-0.0603157065194673	0.379055075162112	-0.159121221351994	0.873573369009346	0.92304228251541	2651	chr10	25296364	25298762	2399	*	7.23	7.35	7.11	-0.24	0.334	0.699	174.04	151.26	138.84	137	Promoter (<=1kb)	10	25169090	25299163	130074	2	432442	uc007eri.1	401	ENSMUSG00000039166	A kinase (PRKA) anchor protein 7	uc007eri.1;uc011xbv.1	432442;432442	0;0	Unchanged	Unchanged	Unchanged
Akap8	165.856501093687	0.0560155294781696	0.196503651353579	0.285061010786908	0.775597400157884	0.857692461758608	16345	chr17	32319838	32322367	2530	*	8.08	8.09	8.06	-0.02	0.912	0.979	302.03	242.35	268.16	267	Promoter (<=1kb)	17	32303672	32321238	17567	2	56399	uc008bwg.2	0	ENSMUSG00000024045	A kinase (PRKA) anchor protein 8	uc008bwj.1;uc008bwk.1;uc008bwg.2;uc008bwh.2;uc008bwi.2;uc012aox.2	54194;54194;56399;56399;56399;56399	0;0;0;0;0;0	Unchanged	Unchanged	Unchanged
Akap8l	307.289465960513	0.103348675195883	0.215168426950105	0.480315242625482	0.63100325197924	0.748338049975776	16347	chr17	32349314	32350637	1324	*	7.3	7.06	7.5	0.43	0.0874	0.345	156.54	111.15	181.63	180	Promoter (<=1kb)	17	32321424	32350577	29154	2	54194	uc008bwj.1	0	ENSMUSG00000002625	A kinase (PRKA) anchor protein 8-like	uc008bwm.2;uc008bwn.2;uc008bwo.2;uc008bwq.2;uc008bwj.1;uc008bwk.1	22404;22404;22404;22404;54194;54194	0;0;0;0;0;0	Unchanged	Unchanged	Unchanged
Akap9	1000.95979320849	-0.212001022064595	0.16805978239329	-1.2614619574389	0.207142457948029	0.336930682824557	27630	chr5	3927773	3928981	1209	*	7.24	7.24	7.24	0	0.99	0.998	162.06	140.4	140.74	161	Promoter (<=1kb)	5	3928054	3954765	26712	1	100986	uc008wib.1	0	ENSMUSG00000040407	A kinase (PRKA) anchor protein (yotiao) 9	uc008wib.1;uc008wic.1;uc008wid.1	100986;100986;100986	0;0;0	Unchanged	Unchanged	Unchanged
Akip1	38.8329649892149	-0.491782209172751	0.343469221911557	-1.4318086681414	0.152198585864548	0.267019698929197	34488	chr7	109703026	109704853	1828	*	7.37	7.33	7.42	0.09	0.717	0.924	182.32	139.56	175.92	166	Promoter (<=1kb)	7	109703737	109712181	8445	1	57373	uc009jdy.1	0	ENSMUSG00000031023	A kinase (PRKA) interacting protein 1	uc009jdy.1	57373	0	Unchanged	Unchanged	Unchanged
Akirin1	532.177539325459	0.907925533814047	0.180339597676315	5.03453232408585	4.79016846958144e-07	4.54742601655579e-06	26403	chr4	123749120	123751091	1972	*	7.59	7.65	7.53	-0.13	0.595	0.873	224.68	178.01	174.02	195	Promoter (<=1kb)	4	123735195	123750299	15105	2	68050	uc008upv.1	0	ENSMUSG00000023075	akirin 1	uc008upv.1	68050	0	Unchanged	FGF_up	Unchanged
Akirin2	280.670552530742	0.265012423631009	0.164627025401096	1.60977471946259	0.107447046104542	0.20343646135905	25273	chr4	34550560	34553143	2584	*	8.74	8.72	8.76	0.04	0.845	0.961	472.38	371.05	448.84	417	Promoter (<=1kb)	4	34550615	34566908	16294	1	433693	uc008sga.1	0	ENSMUSG00000028291	akirin 2	uc008sga.1	433693	0	Unchanged	Unchanged	Unchanged
Akna	88.1451479321036	0.0958134642046062	0.244519607178208	0.391843686117067	0.695173714126397	0.799037752089418	25721	chr4	63402523	63404257	1735	*	7.08	7.09	7.07	-0.02	0.941	0.986	140.89	132.04	127.43	142	Promoter (<=1kb)	4	63367123	63402603	35481	2	100182	uc057lip.1	0	ENSMUSG00000039158	AT-hook transcription factor	uc057lip.1;uc008tgb.3;uc008tgc.1;uc008tge.2	100182;100182;100182;100182	0;0;0;0	Unchanged	Unchanged	Unchanged
Akr1a1	2847.3733889812	0.122786703314211	0.119853436269773	1.02447378344527	0.305611547497791	0.451727580471629	26220	chr4	116650461	116652724	2264	*	7.66	7.81	7.5	-0.3	0.202	0.551	255.07	193.05	170.22	193	Promoter (<=1kb)	4	116636510	116651674	15165	2	58810	uc008uha.2	0	ENSMUSG00000028692	aldo-keto reductase family 1, member A1 (aldehyde reductase)	uc008uha.2;uc008uhb.2	58810;58810	0;0	Unchanged	Unchanged	Unchanged
Akr1b8	741.607259051854	0.93836311453858	0.165542097746948	5.66842590078198	1.44115371347118e-08	1.83241161525612e-07	30786	chr6	34353374	34355520	2147	*	7.71	7.55	7.85	0.3	0.199	0.547	195.21	179.68	200.65	260	Promoter (<=1kb)	6	34354164	34368454	14291	1	14187	uc009bgz.1	0	ENSMUSG00000029762	aldo-keto reductase family 1, member B8	uc009bgz.1	14187	0	Unchanged	FGF_up	Unchanged
Akr1cl	577.943320751796	-0.663217567276601	0.24778845549832	-2.6765474845986	0.00743850243830299	0.022848877189051	511	chr1	65032087	65032772	686	*	6.03	6.29	5.72	-0.57	0.0927	0.357	78.27	78.56	50.4	55	Promoter (<=1kb)	1	65013078	65032759	19682	2	70861	uc007bhc.2	0	ENSMUSG00000025955	aldo-keto reductase family 1, member C-like	uc007bhc.2;uc007bhd.2;uc007bhe.3	70861;70861;70861	0;0;0	Unchanged	FGF_down	Unchanged
Akr1e1	75.167586457334	-0.554852034365985	0.260568807087876	-2.12938778270133	0.0332221904189155	0.0791925847401034	9216	chr13	4608544	4609184	641	*	5.59	5.75	5.42	-0.33	0.414	0.765	62.62	45.13	46.6	39	Promoter (<=1kb)	13	4592490	4609164	16675	2	56043	uc007pjs.1	0	ENSMUSG00000045410	aldo-keto reductase family 1, member E1	uc007pjs.1;uc007pjt.1	56043;56043	0;0	Unchanged	Unchanged	Unchanged
Akr7a5	259.160370844806	-0.605713562455239	0.155781511793617	-3.88822495995356	0.000100980012986332	0.00055083562369409	27088	chr4	139309817	139311330	1514	*	6.91	6.87	6.94	0.07	0.797	0.947	138.12	96.11	120.77	125	Promoter (<=1kb)	4	139310744	139318786	8043	1	110198	uc008vmc.2	0	ENSMUSG00000028743	aldo-keto reductase family 7, member A5 (aflatoxin aldehyde reductase)	uc008vmc.2;uc033igf.1;uc008vma.2;uc012dnr.1	110198;212555;212555;212555	0;0;0;-3127	Unchanged	FGF_down	Unchanged
Akt1	30.8917191640703	0.0190955184023351	0.361591271755513	0.0528096773730932	0.95788355083323	0.97645783960265	9136	chr12	112673099	112675349	2251	*	8.31	8.18	8.42	0.24	0.282	0.648	338.86	241.52	307.15	380	Promoter (<=1kb)	12	112653821	112674276	20456	2	11651	uc007pex.2	0	ENSMUSG00000001729	thymoma viral proto-oncogene 1	uc007pex.2;uc007pey.2;uc007pez.2;uc007pfa.2	11651;11651;382639;382639	0;0;-3491;-3491	Unchanged	Unchanged	Unchanged
Akt1s1	477.428411622409	0.00424077310676571	0.136783163754414	0.0310036190885288	0.975266653446399	0.986774458668489	33465	chr7	44851291	44851705	415	*	3.39	3.06	3.65	0.59	0.471	0.804	9.21	7.52	16.17	9	Promoter (2-3kb)	7	44849224	44855421	6198	1	67605	uc009grd.2	2067	ENSMUSG00000011096	AKT1 substrate 1 (proline-rich)	uc009grc.1;uc012fjv.1;uc009grd.2;uc057aha.1;uc057ahb.1;uc009gre.2;uc012fjw.1	233204;233204;67605;67605;67605;67605;735269	0;0;0;0;0;0;0	Unchanged	Unchanged	Unchanged
Akt2	5.50105076922697	-0.667827825132827	0.814602675074375	-0.819820319239502	0.412318545816779	0.5586703615919	33090	chr7	27590730	27593004	2275	*	8.3	8.15	8.44	0.28	0.172	0.507	313.08	256.56	363.26	329	Promoter (<=1kb)	7	27591560	27639453	47894	1	11652	uc009fwr.2	0	ENSMUSG00000004056	thymoma viral proto-oncogene 2	uc009fwr.2	11652	0	Unchanged	Unchanged	Unchanged
Alad	1435.00493132683	-0.74445023907299	0.20956806984603	-3.55230756107044	0.000381868226479807	0.00176765648446423	25713	chr4	62518368	62521482	3115	*	9.13	9.1	9.16	0.05	0.896	0.974	690.62	410.33	505.9	636	Promoter (<=1kb)	4	62505984	62519909	13926	2	17025	uc008tez.2	0	ENSMUSG00000028393	aminolevulinate, delta-, dehydratase	uc008tez.2;uc008tfa.2;uc008tfc.1;uc012dft.1;uc008tfb.2;uc012dfs.2	17025;17025;214106;214106;59001;59001	0;0;-3887;-3887;0;0	Unchanged	FGF_down	Unchanged
Alas1	586.915271439442	0.527833063371227	0.178132373095969	2.96315068506306	0.00304507462244917	0.0107295789762714	39389	chr9	106246988	106248559	1572	*	7.38	7.15	7.57	0.43	0.09	0.351	166.67	117	192.09	189	Promoter (<=1kb)	9	106233455	106247730	14276	2	11655	uc057apv.1	0	ENSMUSG00000032786	aminolevulinic acid synthase 1	uc057apv.1;uc009rjj.2;uc012gzt.1	11655;11655;11655	0;0;0	Unchanged	FGF_up	Unchanged
Aldh18a1	1123.9873603109	-0.214024698255242	0.122357067765462	-1.74918132776351	0.0802596806453164	0.16095715974395	19497	chr19	40587659	40590023	2365	*	7.76	7.65	7.87	0.22	0.376	0.735	247.7	153.77	223.47	245	Promoter (<=1kb)	19	40550257	40588463	38207	2	56454	uc008hkw.2	0	ENSMUSG00000025007	aldehyde dehydrogenase 18 family, member A1	uc008hkw.2;uc008hkx.2;uc008hky.2	56454;56454;56454	0;0;0	Unchanged	Unchanged	Unchanged
Aldh1a1	2769.36753909179	-0.806666877920043	0.257553207075564	-3.13203973299146	0.00173596380309295	0.00660141246406839	19163	chr19	20491940	20494626	2687	*	7.66	7.91	7.36	-0.55	0.0366	0.2	293.74	186.36	144.54	183	Promoter (<=1kb)	19	20492715	20566853	74139	1	11668	uc008gyl.1	0	ENSMUSG00000053279	aldehyde dehydrogenase family 1, subfamily A1	uc008gyl.1;uc008gyk.1;uc012bji.1	11668;320092;320092	0;0;0	Unchanged	FGF_down	Unchanged
Aldh1l2	191.921253327528	-0.233753999949099	0.233966670858707	-0.999091020490967	0.317750600650433	0.46433001332363	3688	chr10	83533510	83534009	500	*	4.4	4.34	4.46	0.12	0.839	0.959	23.02	17.55	19.97	24	Promoter (<=1kb)	10	83487447	83534140	46694	2	216188	uc007gkh.2	131	ENSMUSG00000020256	aldehyde dehydrogenase 1 family, member L2	uc007gkh.2;uc007gki.2	216188;216188	0;0	Unchanged	Unchanged	Unchanged
Aldh2	2549.15969132196	0.025892615145011	0.115501890002673	0.224174817783604	0.822621277340883	0.890012628476349	29238	chr5	121592397	121594870	2474	*	7.49	7.49	7.48	-0.01	0.976	0.995	210.87	148.76	167.37	190	Promoter (<=1kb)	5	121566027	121593824	27798	2	11669	uc008zjt.2	0	ENSMUSG00000029455	aldehyde dehydrogenase 2, mitochondrial	uc008zjt.2;uc008zju.2;uc008zjv.2	11669;11669;338350	0;0;0	Unchanged	Unchanged	Unchanged
Aldh3b1	132.184372568401	-0.396689996087381	0.287387739490173	-1.38033027014691	0.167484978955335	0.286541721797047	18652	chr19	3929317	3931155	1839	*	6.7	6.35	6.98	0.63	0.029	0.171	93	70.2	136.94	116	Promoter (<=1kb)	19	3913491	3929716	16226	2	67689	uc008fxq.1	0	ENSMUSG00000024885	aldehyde dehydrogenase 3 family, member B1	uc008fxr.3;uc008fxs.2;uc012bfz.1;uc008fxq.1	54445;54445;54445;67689	-4031;-4031;-4031;0	Unchanged	Unchanged	Unchanged
Aldh4a1	539.739731220651	-0.268194812575056	0.13996432761336	-1.91616547693439	0.0553440361442612	0.119356174665502	27115	chr4	139622797	139623567	771	*	5.7	5.81	5.59	-0.22	0.578	0.866	63.54	48.47	54.2	42	Promoter (<=1kb)	4	139622894	139649691	26798	1	212647	uc012dnu.1	0	ENSMUSG00000028737	aldehyde dehydrogenase 4 family, member A1	uc008vmn.2;uc008vmo.3;uc012dnu.1	212632;212632;212647	0;0;0	Unchanged	Unchanged	Unchanged
Aldh5a1	341.889479890479	-0.390570199605532	0.173725466907425	-2.24820348195501	0.0245632177617063	0.0620151201284143	9489	chr13	24937117	24938931	1815	*	6.68	6.82	6.52	-0.3	0.365	0.724	125.23	101.12	61.81	122	Promoter (<=1kb)	13	24907579	24937661	30083	2	214579	uc007pwp.2	0	ENSMUSG00000035936	aldhehyde dehydrogenase family 5, subfamily A1	uc007pws.1;uc007pwp.2;uc007pwr.2	14756;214579;493800	0;0;0	Unchanged	Unchanged	Unchanged
Aldh6a1	146.932105949323	-0.504341198677471	0.209293334604736	-2.40973368612026	0.0159641687623696	0.0433799816575244	8627	chr12	84450153	84450992	840	*	5.83	5.89	5.76	-0.13	0.721	0.925	65.38	53.49	49.45	59	Promoter (<=1kb)	12	84430717	84451024	20308	2	104776	uc007ofk.4	32	ENSMUSG00000021238	aldehyde dehydrogenase family 6, subfamily A1	uc057bcb.2;uc007ofk.4;uc007ofl.1	104776;104776;217708	-1836;0;0	Unchanged	FGF_down	Unchanged
Aldh7a1	754.078235252279	-0.0846041411716306	0.134606725390897	-0.628528336351254	0.529657889799336	0.663432309671102	18044	chr18	56570836	56573868	3033	*	8.2	8.25	8.15	-0.1	0.619	0.884	335.18	274.95	279.58	288	Promoter (<=1kb)	18	56525736	56572939	47204	2	110695	uc008eyo.2	0	ENSMUSG00000053644	aldehyde dehydrogenase family 7, member A1	uc008eyo.2;uc008eyp.2;uc008eyq.2	110695;56698;56698	0;0;0	Unchanged	Unchanged	Unchanged
Aldh9a1	301.483702852076	-0.14684495650607	0.178531002705322	-0.822517962039613	0.410782168083604	0.55734941794825	1786	chr1	167349493	167350674	1182	*	6.02	6.21	5.8	-0.41	0.259	0.621	89.32	58.5	53.25	58	Promoter (<=1kb)	1	167349991	167368530	18540	1	56752	uc007dkx.1	0	ENSMUSG00000026687	aldehyde dehydrogenase 9, subfamily A1	uc007dkx.1	56752	0	Unchanged	Unchanged	Unchanged
Aldoa	5466.72904599217	0.310601380067387	0.135586790279887	2.29079381130141	0.02197534175121	0.0565445176771715	34942	chr7	126799520	126800767	1248	*	7.38	7.48	7.27	-0.21	0.391	0.747	201.66	155.44	140.74	167	Promoter (<=1kb)	7	126795234	126800447	5214	2	11674	uc009jsv.2	0	ENSMUSG00000030695	aldolase A, fructose-bisphosphate	uc009jst.2;uc009jsu.2;uc009jsv.2	11674;11674;11674	0;0;0	Unchanged	Unchanged	Unchanged
Alg1	418.95252017543	-0.667074243158974	0.173748712943492	-3.839304659344	0.000123383250745865	0.000660105914464896	14366	chr16	5233599	5234464	866	*	6.82	6.65	6.96	0.31	0.342	0.705	134.44	66.86	112.21	137	Promoter (<=1kb)	16	5233621	5244907	11287	1	208211	uc007yby.2	0	ENSMUSG00000039427	asparagine-linked glycosylation 1 (beta-1,4-mannosyltransferase)	uc007yby.2;uc012aba.2	208211;208211	0;0	Unchanged	FGF_down	Unchanged
Alg10b	1161.64336850573	0.471659922231526	0.128650649814502	3.66620707249905	0.000246174611273285	0.00120981864882331	13872	chr15	90223731	90224089	359	*	4.01	4.01	4.02	0.01	0.997	0.999	13.81	18.39	12.36	20	Promoter (<=1kb)	15	90224311	90230522	6212	1	380959	uc007xhj.1	-222	ENSMUSG00000075470	asparagine-linked glycosylation 10B (alpha-1,2-glucosyltransferase)	uc033gwj.1;uc007xhj.1;uc007xhk.1	102466838;380959;380959	0;0;0	Unchanged	FGF_up	Unchanged
Alg11	667.73096104031	0.581705240341481	0.170254488269413	3.41668079505184	0.000633895574856933	0.00275502542206911	35580	chr8	22060722	22061705	984	*	5.74	5.64	5.83	0.19	0.621	0.884	57.09	42.62	65.61	48	Promoter (<=1kb)	8	22060721	22071627	10907	1	207958	uc009lcl.2	1	ENSMUSG00000063362	asparagine-linked glycosylation 11 (alpha-1,2-mannosyltransferase)	uc009lck.1;uc009lcl.2;uc009lcm.2;uc009lcn.2	11979;207958;207958;207958	-648;0;0;0	Unchanged	FGF_up	Unchanged
Alg12	218.90208535999	-0.222480374789501	0.176048708021528	-1.26374329746456	0.206322179085553	0.335962218587266	13836	chr15	88818364	88819377	1014	*	5.94	5.79	6.08	0.29	0.446	0.788	61.7	49.31	51.35	84	Promoter (<=1kb)	15	88805243	88819318	14076	2	223774	uc007xen.2	0	ENSMUSG00000035845	asparagine-linked glycosylation 12 (alpha-1,6-mannosyltransferase)	uc007xen.2;uc007xeo.2;uc007xep.1	223774;223774;76737	0;0;0	Unchanged	Unchanged	Unchanged
Alg13	118.946136881418	-0.0357870570159761	0.206591694827159	-0.173226019787081	0.862473771970625	0.915404511483752	40590	chrX	144317616	144318911	1296	*	6.44	6.5	6.38	-0.13	0.688	0.913	99.45	81.9	72.27	94	Promoter (<=1kb)	20	144317966	144325197	7232	1	67574	uc009ums.2	0	ENSMUSG00000041718	asparagine-linked glycosylation 13	uc009ums.2;uc009umt.2;uc009umu.3	67574;67574;67574	0;0;0	Unchanged	Unchanged	Unchanged
Alg14	212.514955105873	-0.170536020835433	0.183072540654036	-0.931521571865366	0.351583831218998	0.49717581054537	24586	chr3	121290910	121292853	1944	*	7.75	7.62	7.87	0.26	0.251	0.611	216.39	176.33	225.37	244	Promoter (<=1kb)	3	121291817	121362011	70195	1	66789	uc008rdx.1	0	ENSMUSG00000039887	asparagine-linked glycosylation 14	uc008rdx.1	66789	0	Unchanged	Unchanged	Unchanged
Alg5	573.666841015814	-0.282812411068734	0.148859244862981	-1.89986460920887	0.0574508894715766	0.12307815575628	23530	chr3	54734041	54736549	2509	*	8.4	8.33	8.46	0.13	0.515	0.831	356.36	285.81	329.98	375	Promoter (<=1kb)	3	54735539	54739738	4200	1	66248	uc008pfr.1	0	ENSMUSG00000036632	asparagine-linked glycosylation 5 (dolichyl-phosphate beta-glucosyltransferase)	uc008pfr.1;uc008pfs.1;uc008pft.1;uc008pfu.1;uc008pfq.2;uc012cpl.1	66248;66248;66248;66248;69639;69639	0;0;0;0;0;0	Unchanged	Unchanged	Unchanged
Alg6	225.47658516749	-0.883291761093855	0.184029458302291	-4.79973026733004	1.58879467147744e-06	1.32792125269219e-05	25967	chr4	99715092	99716639	1548	*	7.22	7.11	7.32	0.2	0.411	0.763	151.01	126.19	151.2	168	Promoter (<=1kb)	4	99715630	99763460	47831	1	320438	uc008tuw.1	0	ENSMUSG00000073792	asparagine-linked glycosylation 6 (alpha-1,3,-glucosyltransferase)	uc008tuw.1	320438	0	Unchanged	FGF_down	Unchanged
Alg8	644.820134359081	-0.506282326674479	0.16040384702056	-3.15629790730384	0.00159785571261494	0.00614909834848179	34179	chr7	97371600	97372564	965	*	6.99	7.14	6.83	-0.3	0.297	0.663	166.67	114.49	96.04	132	Promoter (<=1kb)	7	97371617	97392159	20543	1	381903	uc009ijc.3	0	ENSMUSG00000035704	asparagine-linked glycosylation 8 (alpha-1,3-glucosyltransferase)	uc009ijc.3	381903	0	Unchanged	FGF_down	Unchanged
Alg9	867.612465070975	0.037590994909629	0.146852812563699	0.255977357555365	0.797968321028038	0.873860855133509	38221	chr9	50774469	50776327	1859	*	7.09	7.09	7.1	0.01	0.957	0.991	157.46	114.49	128.38	146	Promoter (<=1kb)	9	50775225	50843639	68415	1	102580	uc009pkt.2	0	ENSMUSG00000032059	asparagine-linked glycosylation 9 (alpha 1,2 mannosyltransferase)	uc009pkt.2;uc009pku.2;uc012gtb.1;uc009pkq.1;uc009pkr.1;uc009pks.1	102580;102580;102580;382137;382137;382137	0;0;-2643;0;0;0	Unchanged	Unchanged	Unchanged
Alkbh1	345.571604068222	0.453910184741057	0.166366827307577	2.72836954389876	0.00636482601729961	0.0199980022499382	8765	chr12	87441910	87445252	3343	*	8.65	8.67	8.64	-0.03	0.882	0.97	473.3	341.8	406.05	391	Promoter (<=1kb)	12	87428077	87443839	15763	2	211064	uc007oix.2	0	ENSMUSG00000079036	alkB homolog 1, histone H2A dioxygenase	uc011ypm.1;uc007oix.2;uc007oiy.2;uc007oiz.2;uc007oja.2;uc007ojb.1;uc007oje.2;uc007ojd.2;uc007ojc.1;uc007ojf.1	100526546;211064;211064;211064;211064;211064;380773;380773;654309;66354	-4153;0;0;0;0;0;0;0;0;0	Unchanged	FGF_up	Unchanged
Alkbh2	101.865573073068	0.0188563634050866	0.22947509383238	0.082171721079501	0.934510160687409	0.961315036311599	28959	chr5	114126515	114128422	1908	*	8.09	8	8.18	0.18	0.396	0.75	279.01	234	291.94	288	Promoter (<=1kb)	5	114123934	114128176	4243	2	231642	uc008yzd.1	0	ENSMUSG00000044339	alkB homolog 2, alpha-ketoglutarate-dependent dioxygenase	uc008yzc.1;uc008yzf.1;uc008yzg.1;uc008yzh.1;uc008yzd.1;uc008yze.1	100756;22256;22256;22256;231642;231642	0;0;0;0;0;0	Unchanged	Unchanged	Unchanged
Alkbh3	245.451692708993	-0.223187205157751	0.162628402550122	-1.37237531487752	0.169946630636067	0.289840486495757	21437	chr2	94009867	94011231	1365	*	7.06	7.03	7.09	0.06	0.814	0.951	149.17	111.98	125.52	147	Promoter (<=1kb)	2	93980634	94010730	30097	2	69113	uc008lgn.1	0	ENSMUSG00000040174	alkB homolog 3, alpha-ketoglutarate-dependent dioxygenase	uc008lgn.1;uc008lgo.1	69113;69113	0;0	Unchanged	Unchanged	Unchanged
Alkbh3os1	2.93739463269018	1.40395560763732	1.18677170858036	1.18300394042656	0.23680758575331	0.372705328538789	21436	chr2	93980134	93980569	436	*	4.24	3.84	4.55	0.71	0.254	0.614	11.05	17.55	20.92	26	Promoter (<=1kb)	2	93980034	93983575	3542	1	70852	uc029udl.1	100	ENSMUSG00000027196	alkB homolog 3, opposite strand 1	uc008lgm.1;uc008lgn.1;uc029udl.1	69113;69113;70852	4220;0;0	Unchanged	Unchanged	Unchanged
Alkbh5	1300.00350994429	0.109066949997152	0.127977275814331	0.852236846761651	0.394082649606246	0.540704377005379	5407	chr11	60536224	60539594	3371	*	8.88	8.78	8.96	0.18	0.387	0.744	518.42	362.7	499.24	499	Promoter (<=1kb)	11	60537683	60558512	20830	1	268420	uc007jgd.2	0	ENSMUSG00000042650	alkB homolog 5, RNA demethylase	uc007jgd.2	268420	0	Unchanged	Unchanged	Unchanged
Alkbh6	69.9495632061011	-0.315380954748538	0.25957061189558	-1.21501025268381	0.224362181021933	0.357973139443885	33265	chr7	30308803	30309202	400	*	3.9	3.94	3.86	-0.08	0.912	0.979	15.65	15.04	18.07	11	Promoter (<=1kb)	7	30308753	30314303	5551	1	233065	uc009geb.1	50	ENSMUSG00000042831	alkB homolog 6	uc009geb.1;uc009gea.1	233065;76686	0;0	Unchanged	Unchanged	Unchanged
Alkbh7	60.3437622812667	-0.45530894691217	0.316629024417502	-1.43798866117784	0.150437271394559	0.264602290143045	16894	chr17	56997325	56998050	726	*	5.67	5.26	5.99	0.73	0.0667	0.292	45.12	31.76	56.11	71	Promoter (<=1kb)	17	56997339	56999340	2002	1	66400	uc008ddn.3	0	ENSMUSG00000002661	alkB homolog 7	uc008ddo.2;uc008ddm.2;uc008ddn.3;uc012avz.2	19197;53895;66400;66400	1968;0;0;0	Unchanged	Unchanged	Unchanged
Alkbh8	162.418519534267	0.543385506027965	0.18093307744493	3.00324027923171	0.00267121440456231	0.00953879730006834	37563	chr9	3334753	3336262	1510	*	6.21	6.19	6.24	0.05	0.873	0.968	77.35	68.53	77.03	74	Promoter (<=1kb)	9	3335231	3385847	50617	1	67667	uc009oat.2	0	ENSMUSG00000025899	alkB homolog 8, tRNA methyltransferase	uc009oat.2;uc012gnj.2;uc009oau.1;uc009oav.1;uc009oaw.2;uc012gnk.2	67667;67667;67667;67667;67667;67667	0;0;0;0;0;0	Unchanged	FGF_up	Unchanged
Alms1	173.658956840622	-0.821414714018407	0.225382293232561	-3.64453969403368	0.000267870792619328	0.00129882016770232	31452	chr6	85587586	85588242	657	*	5.76	6.04	5.41	-0.62	0.126	0.43	81.03	50.14	34.23	51	Promoter (<=1kb)	6	85587531	85702751	115221	1	236266	uc009cpz.1	55	ENSMUSG00000063810	ALMS1, centrosome and basal body associated	uc009cpz.1	236266	0	Unchanged	FGF_down	Unchanged
Alox5ap	19.892679974752	0.175978174839371	0.632475331217185	0.278237215198108	0.780830268692272	0.861392468625308	30326	chr5	149267729	149268222	494	*	4.49	4.48	4.5	0.01	0.986	0.997	23.02	21.73	17.12	28	Promoter (2-3kb)	5	149265004	149288153	23150	1	11690	uc009app.2	2725	ENSMUSG00000060063	arachidonate 5-lipoxygenase activating protein	uc009app.2;uc057bwd.1	11690;11690	0;0	Unchanged	Unchanged	Unchanged
Aloxe3	11.1387804576388	2.13045937823773	0.795595291112025	2.6778179836383	0.00741034756628344	0.0227799573333898	5580	chr11	69125273	69126597	1325	*	6.98	6.73	7.18	0.45	0.0936	0.359	121.55	91.09	135.98	155	Promoter (<=1kb)	11	69126377	69149115	22739	1	23801	uc007jpj.2	0	ENSMUSG00000020892	arachidonate lipoxygenase 3	uc007jpj.2;uc007jpi.1	23801;84653	0;0	Unchanged	FGF_up	Unchanged
Alpk1	204.141217707525	-0.201979148497099	0.207283356006879	-0.974410837358287	0.329852590631921	0.476307619092995	24730	chr3	127779716	127780558	843	*	6.45	6.52	6.37	-0.14	0.627	0.887	85.64	97.78	79.88	86	Promoter (<=1kb)	3	127670310	127780527	110218	2	71481	uc012cxm.1	0	ENSMUSG00000028028	alpha-kinase 1	uc012cxm.1;uc008rhl.1	71481;71481	0;0	Unchanged	Unchanged	Unchanged
Als2	449.57590062614	0.0405710262555086	0.141570378286657	0.286578497186459	0.774435080893532	0.85712085256408	386	chr1	59236512	59237988	1477	*	6.87	6.9	6.83	-0.07	0.825	0.955	142.73	96.11	112.21	116	Promoter (<=1kb)	1	59162756	59237093	74338	2	74018	uc011wlp.1	0	ENSMUSG00000026024	alsin Rho guanine nucleotide exchange factor	uc011wlp.1;uc007bdm.2;uc007bdn.3	74018;74018;74018	0;0;0	Unchanged	Unchanged	Unchanged
Als2cl	120.518892122267	-1.23997111543112	0.278828601998956	-4.44707288470986	8.70483091875182e-06	6.14531241234032e-05	39596	chr9	110880237	110880915	679	*	4.76	4.69	4.82	0.13	0.805	0.949	25.78	25.91	31.38	25	Promoter (<=1kb)	9	110880322	110900530	20209	1	235633	uc009rvf.2	0	ENSMUSG00000044037	ALS2 C-terminal like	uc009rvb.1;uc012hbl.4;uc009rvc.2;uc009rvd.2;uc009rve.2;uc009rvf.2	20776;20776;235633;235633;235633;235633	0;0;0;0;0;0	Unchanged	FGF_down	Unchanged
Alyref	751.066055560006	0.358797114165885	0.166621520981217	2.1533659760934	0.0312899273752637	0.0753986314494258	7478	chr11	120597066	120598417	1352	*	8.38	8.36	8.41	0.05	0.818	0.952	386.75	269.1	334.73	344	Promoter (<=1kb)	11	120594516	120598365	3850	2	21681	uc007mtl.1	0	ENSMUSG00000025134	Aly/REF export factor	uc007mtl.1;uc007mtm.2;uc007mtn.2	21681;66156;66156	0;0;0	Unchanged	Unchanged	Unchanged
Alyref2	28.1924423595333	-0.179542804633228	0.385741111659985	-0.46544897395196	0.641609969756807	0.757384924299591	1919	chr1	171503060	171504632	1573	*	7.73	7.7	7.76	0.06	0.788	0.945	210.87	206.42	224.42	210	Promoter (<=1kb)	1	171503478	171504750	1273	1	56009	uc007dop.1	0	ENSMUSG00000060244	Aly/REF export factor 2	uc007dop.1	56009	0	Unchanged	Unchanged	Unchanged
Amacr	53.2601707901127	-1.29636706344445	0.298257065839646	-4.34647561423215	1.38342423802216e-05	9.35219824255703e-05	12453	chr15	10981181	10982487	1307	*	6.46	6.61	6.29	-0.33	0.318	0.683	121.55	74.38	77.98	78	Promoter (<=1kb)	15	10981756	10996624	14869	1	17117	uc007vgw.1	0	ENSMUSG00000022244	alpha-methylacyl-CoA racemase	uc007vgw.1;uc007vgu.2;uc007vgv.2	17117;81799;81799	0;28849;28824	Unchanged	FGF_down	Unchanged
Ambra1	592.637409669286	0.273613467515562	0.145801251670535	1.87661946917879	0.0605702670366085	0.128631100145974	21386	chr2	91729742	91731216	1475	*	7.33	7.18	7.46	0.28	0.271	0.635	168.51	122.01	188.29	164	Promoter (<=1kb)	2	91730138	91810969	80832	1	228361	uc008kwq.1	0	ENSMUSG00000040506	autophagy/beclin 1 regulator 1	uc008kwq.1;uc008kwr.1;uc008kws.1;uc008kwt.1;uc008kwu.1	228361;228361;228361;228361;228361	0;0;0;0;0	Unchanged	Unchanged	Unchanged
Amdhd2	83.3962172329854	-0.82325200600024	0.265103582447031	-3.10539751444034	0.00190023458637819	0.00713786360281966	15919	chr17	24162719	24163742	1024	*	6.87	6.68	7.04	0.37	0.177	0.514	116.02	88.58	135.03	129	Promoter (<=1kb)	17	24155833	24163733	7901	2	245847	uc008aum.1	0	ENSMUSG00000036820	amidohydrolase domain containing 2	uc008aup.3;uc008aum.1;uc008auo.1	11984;245847;245847	0;0;0	Unchanged	FGF_down	Unchanged
Amer1	58.5810536068227	-1.74673296473761	0.31185579953914	-5.60109181012162	2.13005874700268e-08	2.61112432247959e-07	40338	chrX	95443517	95444880	1364	*	5.95	6.17	5.69	-0.48	0.189	0.532	84.72	59.34	51.35	52	Promoter (<=1kb)	20	95420313	95444840	24528	2	72345	uc009ttx.3	0	ENSMUSG00000050332	APC membrane recruitment 1	uc009ttx.3	72345	0	Unchanged	FGF_down	Unchanged
Amfr	4918.24183179727	0.584550651265709	0.11669036316218	5.00941667696485	5.45952569177629e-07	5.09783211469611e-06	36642	chr8	94011207	94015139	3933	*	8.74	8.54	8.92	0.38	0.0702	0.301	437.39	307.54	484.98	485	Promoter (<=1kb)	8	93971588	94012640	41053	2	23802	uc009mvn.1	0	ENSMUSG00000031751	autocrine motility factor receptor	uc009mvn.1;uc009mvo.1	23802;68219	0;0	Unchanged	FGF_up	Unchanged
Amigo1	138.908502637015	-0.762996540561044	0.251796974121468	-3.0302053597871	0.00244387507247202	0.00882719699794065	24497	chr3	108186019	108186777	759	*	4.76	4.27	5.13	0.86	0.0937	0.359	19.34	19.22	37.09	33	Promoter (<=1kb)	3	108186289	108192286	5998	1	229715	uc008qyg.2	0	ENSMUSG00000050947	adhesion molecule with Ig like domain 1	uc008qyg.2;uc008qyh.2;uc033hze.1	229715;229715;229715	0;0;0	Unchanged	FGF_down	Unchanged
Ammecr1	648.198117630282	1.02247782167552	0.159685655146475	6.40306620364633	1.52287117788537e-10	2.65713230920962e-09	40580	chrX	142965117	142967360	2244	*	7.42	7.19	7.61	0.43	0.0981	0.368	174.04	117	177.83	214	Promoter (<=1kb)	20	142853474	142966728	113255	2	56068	uc009umc.1	0	ENSMUSG00000042225	Alport syndrome, mental retardation, midface hypoplasia and elliptocytosis chromosomal region gene 1	uc009umc.1	56068	0	Unchanged	FGF_up	Unchanged
Ammecr1l	792.528121343991	0.541792557759606	0.12532647852676	4.32304939968389	1.53887259074303e-05	0.000102809419813084	17656	chr18	31759027	31761261	2235	*	8.47	8.41	8.54	0.13	0.524	0.837	380.3	299.18	355.65	388	Promoter (<=1kb)	18	31759824	31777524	17701	1	225339	uc008eif.2	0	ENSMUSG00000041915	AMME chromosomal region gene 1-like	uc008eif.2;uc008eig.2;uc008eih.2;uc008eii.2;uc008eij.2	225339;225339;225339;225339;225339	0;0;0;0;-519	Unchanged	FGF_up	Unchanged
Amotl2	2347.08757301206	0.781226379986901	0.209433289412474	3.73019199659465	0.000191333912543967	0.000969403528073545	39333	chr9	102716700	102719764	3065	*	9.05	9.18	8.9	-0.28	0.132	0.439	633.53	526.5	477.37	477	Promoter (<=1kb)	9	102716802	102733417	16616	1	56332	uc009rfw.1	0	ENSMUSG00000032531	angiomotin-like 2	uc009rfw.1;uc009rfx.1;uc012gzh.1;uc009rfy.1	56332;56332;56332;56332	0;0;0;0	Unchanged	FGF_up	Unchanged
Ampd2	61.686197949474	0.102408018736045	0.303717034312313	0.337182334760777	0.735979453189292	0.830423621825045	24493	chr3	108084900	108087808	2909	*	8.83	8.71	8.94	0.23	0.285	0.652	498.16	341.8	471.67	512	Promoter (<=1kb)	3	108074062	108085426	11365	2	109674	uc012cwa.2	0	ENSMUSG00000027889	adenosine monophosphate deaminase 2	uc012cwa.2;uc057lgj.1;uc008qxz.2;uc008qya.2	109674;109674;109674;109674	0;0;0;0	Unchanged	Unchanged	Unchanged
Ampd3	776.021613660162	-1.50423553840347	0.20314290163185	-7.4048146714452	1.31333752586643e-13	3.52741800205744e-12	34557	chr7	110770610	110775129	4520	*	8.73	8.64	8.81	0.17	0.375	0.734	418.05	381.08	434.58	462	Promoter (<=1kb)	7	110772604	110794150	21547	1	11717	uc009jfm.1	0	ENSMUSG00000005686	adenosine monophosphate deaminase 3	uc009jfl.3;uc009jfm.1;uc009jfn.3	11717;11717;11717	0;0;0	Unchanged	FGF_down	Unchanged
Anapc1	1841.71735249875	-0.308785572276895	0.146520813270042	-2.10745194068636	0.0350784233639223	0.0827753832271666	22023	chr2	128686384	128688235	1852	*	7.86	7.87	7.84	-0.03	0.91	0.978	279.01	188.87	220.62	238	Promoter (<=1kb)	2	128610083	128687395	77313	2	17222	uc008mgq.2	0	ENSMUSG00000014355	anaphase promoting complex subunit 1	uc008mgq.2;uc008mgr.2	17222;17222	0;0	Unchanged	Unchanged	Unchanged
Anapc11	344.560759075192	-0.124343666481464	0.174466471599798	-0.712708094233088	0.476026406734531	0.61727976709245	7479	chr11	120598582	120599611	1030	*	7.05	7.26	6.8	-0.45	0.0893	0.349	174.04	132.04	106.51	117	Promoter (<=1kb)	11	120598421	120608198	9778	1	66156	uc007mtm.2	161	ENSMUSG00000025135	anaphase promoting complex subunit 11	uc007mtl.1;uc007mtm.2;uc007mtn.2	21681;66156;66156	0;0;0	Unchanged	Unchanged	Unchanged
Anapc15	161.89540649002	-0.0398866361810983	0.186469294902708	-0.213904579850048	0.830621468689594	0.894376790755838	34388	chr7	101895515	101897797	2283	*	7.75	7.72	7.77	0.05	0.835	0.958	245.86	177.17	208.26	229	Promoter (<=1kb)	7	101896331	101899538	3208	1	75430	uc009ipq.2	0	ENSMUSG00000030649	anaphase prompoting complex C subunit 15	uc009ipp.2;uc057aiu.1;uc009ipq.2;uc009ipr.2;uc009ips.2;uc057aiv.1;uc009ipt.1;uc009ipu.2;uc009ipv.2	75430;75430;75430;75430;75430;75430;75430;791260;791260	0;0;0;0;0;0;0;5988;0	Unchanged	Unchanged	Unchanged
Anapc2	497.171052406492	-0.603437195825285	0.181958846110761	-3.31633887949567	0.000912051609385533	0.00379555739393311	20287	chr2	25279774	25280148	375	*	3.42	2.94	3.78	0.83	0.34	0.704	12.89	2.51	10.46	17	Exon (uc008ird.2/99152, exon 9 of 13)	2	25272466	25285916	13451	1	99152	uc008ird.2	7308	ENSMUSG00000026965	anaphase promoting complex subunit 2	uc008ird.2;uc008ire.2	99152;99152	0;0	Unchanged	FGF_down	Unchanged
Anapc4	726.731813855377	-0.133367400252254	0.138568662005978	-0.962464371969621	0.335816391647378	0.482097274802314	28288	chr5	52834103	52834937	835	*	6.45	6.32	6.57	0.25	0.398	0.752	82.87	76.89	91.29	99	Promoter (<=1kb)	5	52834135	52866734	32600	1	52206	uc008xkw.1	0	ENSMUSG00000029176	anaphase promoting complex subunit 4	uc008xkw.1;uc008xkx.1	52206;52206	0;0	Unchanged	Unchanged	Unchanged
Anapc5	4149.88315378589	-0.263310807159299	0.126312860249999	-2.08459223105354	0.0371063302949229	0.0866129416257813	29318	chr5	122820855	122822533	1679	*	8.33	8.41	8.25	-0.16	0.443	0.786	365.57	314.23	267.21	340	Promoter (<=1kb)	5	122787459	122821342	33884	2	59008	uc008zmf.3	0	ENSMUSG00000029472	anaphase-promoting complex subunit 5	uc008zmf.3;uc008zmg.3;uc008zmh.3;uc008zmi.3;uc008zmj.3;uc008zmk.3;uc008zml.2;uc008zmm.1;uc008zmn.1	59008;59008;59008;59008;59008;59008;59008;59008;80751	0;0;0;0;0;0;0;-2851;0	Unchanged	Unchanged	Unchanged
Anapc7	522.795846748251	-0.000921457327511493	0.129538415943889	-0.00711339042396993	0.994324383470464	0.996713527748775	29297	chr5	122421687	122423853	2167	*	8.22	8.14	8.29	0.16	0.474	0.806	325.05	238.18	303.35	324	Promoter (<=1kb)	5	122422444	122443434	20991	1	56317	uc008zlg.2	0	ENSMUSG00000029466	anaphase promoting complex subunit 7	uc008zlg.2;uc008zlh.3	56317;56317	0;0	Unchanged	Unchanged	Unchanged
Ang2	4.15374103303585	-0.0845919543852679	1.00882880370724	-0.0838516446739124	0.933174386053498	0.960580506598175	11614	chr14	51199156	51199492	337	*	4.18	4.41	3.91	-0.5	0.426	0.773	17.5	25.07	17.12	13	Distal Intergenic	14	51195486	51195923	438	2	11731	uc007tmu.1	-3233	ENSMUSG00000047894	angiogenin, ribonuclease A family, member 2	uc007tmu.1;uc007tmv.2	11731;503847	-3233;-4203	Unchanged	Unchanged	Unchanged
Angpt2	873.332467761423	-1.36930942318536	0.180800532620626	-7.57359175516696	3.63044079364348e-14	1.06090533901288e-12	35564	chr8	18738825	18741762	2938	*	6.9	7.38	6.18	-1.19	1.92e-05	0.000665	185.09	147.08	68.47	77	Promoter (<=1kb)	8	18690263	18741562	51300	2	11601	uc009kzu.2	0	ENSMUSG00000031465	angiopoietin 2	uc009kzu.2;uc009kzt.2	11601;244329	0;0	FGF_down	FGF_down	FGF_down
Angpt4	825.676239164891	0.66806735153161	0.222950630293002	2.99648110729104	0.00273115161086341	0.00972957497855127	22399	chr2	151910726	151914180	3455	*	7.83	7.52	8.08	0.56	0.0122	0.0946	201.66	166.31	253.9	288	Promoter (<=1kb)	2	151911332	151944654	33323	1	11602	uc008neq.1	0	ENSMUSG00000027460	angiopoietin 4	uc008neq.1	11602	0	Unchanged	FGF_up	Unchanged
Angptl2	1063.10715641079	-0.513812842831471	0.244761148447533	-2.09924183674768	0.0357955877325615	0.0841851366744539	20706	chr2	33215032	33217701	2670	*	7.38	7.27	7.49	0.21	0.408	0.759	165.75	143.74	148.35	210	Promoter (<=1kb)	2	33215961	33230124	14164	1	26360	uc008jhp.1	0	ENSMUSG00000004105	angiopoietin-like 2	uc008jhm.2;uc008jhn.2;uc008jho.2;uc008jhp.1;uc008jhq.1;uc008jhr.1	241308;241308;241308;26360;26360;26360	0;0;0;0;0;0	Unchanged	Unchanged	Unchanged
Angptl4	146.536381297261	3.07151530174398	0.380153505924577	8.07967111673402	6.49416762808047e-16	2.33087962434888e-14	16384	chr17	33780778	33781530	753	*	4.39	1.44	5.29	3.85	1.87e-06	9.76e-05	4.6	0.84	49.45	29	Promoter (<=1kb)	17	33774900	33781575	6676	2	57875	uc008bzp.2	45	ENSMUSG00000002289	angiopoietin-like 4	uc008bzp.2;uc012apl.1	57875;57875	0;0	FGF_up	FGF_up	FGF_up
Angptl6	3.49275067143558	-1.30729745151883	1.07741675754099	-1.21336283510432	0.22499112894295	0.358620672601959	37733	chr9	20878492	20878938	447	*	5.21	5.16	5.27	0.11	0.808	0.95	47.88	23.4	39.94	37	Promoter (<=1kb)	9	20873809	20879710	5902	2	70726	uc009ojj.1	772	ENSMUSG00000038742	angiopoietin-like 6	uc012gow.1;uc012gox.1;uc009ojj.1	319278;319278;70726	9850;9850;0	Unchanged	Unchanged	Unchanged
Ank1	401.282415423694	2.31017742702666	0.199470039671789	11.5815760142619	5.10978990077375e-31	6.63828357543998e-29	35622	chr8	23057955	23059216	1262	*	6.36	5.83	6.75	0.92	0.00858	0.0735	73.67	40.11	92.24	123	Promoter (<=1kb)	8	23058259	23150497	92239	1	11733	uc009lei.2	0	ENSMUSG00000031543	ankyrin 1, erythroid	uc009lee.3;uc009lef.3;uc009leg.2;uc009leh.2;uc009lei.2;uc009lej.2;uc012gbg.2;uc012gbh.2	11733;11733;11733;11733;11733;11733;11733;11733	0;0;0;0;0;0;0;0	Unchanged	FGF_up	Unchanged
Ankfy1	894.318891615172	0.0744167797717603	0.133078348313587	0.559195246370233	0.576028477017728	0.703237217294779	5734	chr11	72689476	72690958	1483	*	6.89	6.95	6.83	-0.12	0.668	0.905	134.44	112.82	113.16	115	Promoter (<=1kb)	11	72690002	72725180	35179	1	11736	uc007jzg.1	0	ENSMUSG00000020790	ankyrin repeat and FYVE domain containing 1	uc007jzg.1;uc007jzh.1;uc011xyl.1;uc007jzd.1;uc007jze.1;uc007jzf.1	11736;11736;11736;67128;67128;67128	0;0;0;0;0;0	Unchanged	Unchanged	Unchanged
Ankhd1	709.595182207203	-0.173338663987705	0.145647617300327	-1.19012358183848	0.23399782288868	0.36920686193604	17815	chr18	36560532	36561549	1018	*	7.2	7.39	6.98	-0.42	0.13	0.436	201.66	134.55	114.11	138	Promoter (<=1kb)	18	36560603	36658908	98306	1	108857	uc008env.2	0	ENSMUSG00000024483	ankyrin repeat and KH domain containing 1	uc008env.2;uc008enp.2;uc008enq.2	108857;240215;240215	0;32380;32380	Unchanged	Unchanged	Unchanged
Ankib1	1183.78614079057	0.102327400219414	0.118525974898559	0.863333124296096	0.387954336987094	0.534874868574201	27626	chr5	3802057	3804434	2378	*	8.18	8.27	8.09	-0.18	0.456	0.794	373.85	243.19	252.95	292	Promoter (<=1kb)	5	3689999	3803124	113126	2	70797	uc008who.3	0	ENSMUSG00000040351	ankyrin repeat and IBR domain containing 1	uc008who.3;uc012drr.2;uc012drs.2;uc008whq.3;uc008whs.2;uc008wht.2;uc008whv.2;uc012drt.1;uc008whu.2;uc008whw.2	70797;70797;70797;70797;79264;79264;79264;79264;79264;79264	0;0;0;0;0;0;0;0;0;-1985	Unchanged	Unchanged	Unchanged
Ankle1	80.1971867827423	-2.4635590957466	0.298163426021467	-8.26244562795315	1.42717751651847e-16	5.48476709885171e-15	36236	chr8	71404781	71406739	1959	*	7.05	7.23	6.85	-0.38	0.17	0.504	175.88	123.68	120.77	110	Promoter (<=1kb)	8	71406012	71410542	4531	1	234396	uc009mdc.3	0	ENSMUSG00000046295	ankyrin repeat and LEM domain containing 1	uc009mdc.3;uc009mdd.3;uc009mdb.2	234396;234396;68251	0;0;0	Unchanged	FGF_down	Unchanged
Ankle2	1576.56290655376	0.113637605144366	0.142298674759235	0.798585126225788	0.424531014968727	0.570432230568434	28877	chr5	110229807	110231958	2152	*	7.95	7.77	8.11	0.34	0.13	0.437	244.02	193.88	251.05	303	Promoter (<=1kb)	5	110231004	110238180	7177	1	71782	uc008yqe.2	0	ENSMUSG00000029501	ankyrin repeat and LEM domain containing 2	uc008yqe.2;uc008yqf.2;uc008yqg.2	71782;71782;71782	0;0;0	Unchanged	Unchanged	Unchanged
Ankmy2	155.056828265136	-0.611312370745852	0.205092381914998	-2.98066834583458	0.00287620101634709	0.010193736324535	7931	chr12	36155465	36159001	3537	*	8.97	8.9	9.03	0.14	0.507	0.827	562.62	390.28	544.89	504	Promoter (<=1kb)	12	36157124	36188215	31092	1	217473	uc007njs.2	0	ENSMUSG00000036188	ankyrin repeat and MYND domain containing 2	uc007njs.2;uc007njt.2;uc007njp.2;uc007njq.2;uc007njr.3	217473;217473;66912;66912;66912	0;0;0;0;0	Unchanged	FGF_down	Unchanged
Ankrd1	115.780584058872	-0.776092375926156	0.254433385631961	-3.050277281806	0.00228630179977927	0.00835398321949309	19380	chr19	36119285	36120050	766	*	5.23	5.49	4.92	-0.56	0.203	0.551	46.96	42.62	27.58	33	Promoter (<=1kb)	19	36111965	36119844	7880	2	107765	uc008hhh.1	0	ENSMUSG00000024803	ankyrin repeat domain 1 (cardiac muscle)	uc008hhh.1	107765	0	Unchanged	FGF_down	Unchanged
Ankrd10	998.343233626626	0.158035451497927	0.161294121713723	0.979796720542737	0.327186471248756	0.473797435128945	35490	chr8	11633594	11637383	3790	*	9.05	8.9	9.18	0.28	0.155	0.481	541.44	416.18	542.03	622	Promoter (<=1kb)	8	11611581	11635757	24177	2	102334	uc009kvo.3	0	ENSMUSG00000031508	ankyrin repeat domain 10	uc009kvo.3;uc009kvp.3;uc009kvq.3;uc009kvr.3;uc009kvs.3;uc033jej.1	102334;102334;102334;102334;102334;102465714	0;0;0;0;0;0	Unchanged	Unchanged	Unchanged
Ankrd11	2676.80507863887	0.200660497684169	0.154538677877011	1.29844839130735	0.19413329965097	0.320657987483195	37348	chr8	123039875	123042271	2397	*	8.46	8.41	8.5	0.09	0.682	0.911	407	274.95	340.44	386	Promoter (<=1kb)	8	122883822	123042284	158463	2	77087	uc009ntz.2	13	ENSMUSG00000035569	ankyrin repeat domain 11	uc029wwr.1;uc009ntz.2;uc012gml.1;uc009nub.2	100503178;77087;77087;77087	0;0;0;0	Unchanged	Unchanged	Unchanged
Ankrd12	125.23792225901	-0.238411304518044	0.203798372355352	-1.16983910010007	0.242065725414653	0.379365486905657	16980	chr17	66075877	66078325	2449	*	7.42	7.44	7.39	-0.05	0.855	0.964	208.11	139.56	177.83	158	Promoter (<=1kb)	17	65967501	66077046	109546	2	106585	uc008dgs.1	0	ENSMUSG00000034647	ankyrin repeat domain 12	uc008dgs.1;uc008dgt.1;uc008dgu.1;uc008dgv.1;uc008dgw.2;uc008dgx.2	106585;106585;106585;106585;72900;72900	0;0;0;0;0;0	Unchanged	Unchanged	Unchanged
Ankrd13a	1167.50970402047	0.248162181638007	0.121185724416549	2.04778395172194	0.0405811735190742	0.093077372078291	28988	chr5	114776683	114776949	267	*	2.95	-0.19	3.87	4.05	0.00231	0.0284	0.92	0.84	16.17	13	Promoter (1-2kb)	5	114775140	114805821	30682	1	68420	uc008zaf.2	1543	ENSMUSG00000041870	ankyrin repeat domain 13a	uc008yzz.1;uc008zab.1;uc057lnl.1;uc057lnm.1;uc008zac.1;uc008zad.1;uc008zae.2;uc008zaf.2	26431;26431;26431;26431;26431;26431;67642;68420	-3191;-3191;-3191;-3191;-3191;-3191;-1700;0	FGF_up	Unchanged	Unchanged
Ankrd13b	790.32861644054	0.951587189647598	0.187803772820074	5.06692264675252	4.04298477771321e-07	3.90636653704351e-06	5928	chr11	77489218	77490106	889	*	5.86	5.51	6.13	0.62	0.101	0.376	57.09	34.26	67.52	73	Promoter (<=1kb)	11	77470487	77489678	19192	2	268445	uc007kgx.1	0	ENSMUSG00000037907	ankyrin repeat domain 13b	uc007kgy.1;uc007kgx.1;uc011xzw.1	216963;268445;268445	0;0;0	Unchanged	FGF_up	Unchanged
Ankrd13c	511.50555971735	0.0177680412259282	0.133505011663529	0.133088945534934	0.894123037558209	0.935120628709811	25090	chr3	157946389	157948561	2173	*	8.3	8.32	8.28	-0.03	0.883	0.97	371.09	266.59	291.94	331	Promoter (<=1kb)	3	157947466	158006837	59372	1	433667	uc008rvk.1	0	ENSMUSG00000039988	ankyrin repeat domain 13c	uc008rvk.1;uc008rvl.4	433667;433667	0;0	Unchanged	Unchanged	Unchanged
Ankrd13d	147.235790451366	-0.588682931171942	0.22058121939953	-2.66878083625825	0.00761271065321931	0.0232784686411086	18695	chr19	4282455	4283136	682	*	5.17	5.08	5.25	0.18	0.705	0.919	43.28	24.24	33.28	43	Promoter (<=1kb)	19	4270180	4283137	12958	2	68423	uc008fzr.1	1	ENSMUSG00000005986	ankyrin repeat domain 13 family, member D	uc008fzt.2;uc008fzu.2;uc008fzv.2;uc008fzr.1;uc008fzs.1	110355;110355;110355;68423;68423	5091;0;0;0;0	Unchanged	FGF_down	Unchanged
Ankrd16	178.475463129494	-0.0474978381996784	0.197780782149432	-0.240153960781648	0.810210903295892	0.881693591568106	20174	chr2	11777740	11779202	1463	*	6.81	6.87	6.74	-0.14	0.65	0.898	143.65	91.09	107.46	106	Promoter (<=1kb)	2	11777753	11780814	3062	1	320816	uc008ijg.2	0	ENSMUSG00000047909	ankyrin repeat domain 16	uc008ijg.2;uc008ijh.3;uc012bqv.2;uc008iji.3;uc008ijc.1;uc008ijd.1;uc008ije.1	320816;320816;320816;320816;50755;50755;50755	0;0;0;-4087;0;0;0	Unchanged	Unchanged	Unchanged
Ankrd26	248.142953974306	-0.742277139921621	0.159668755763877	-4.64885654285002	3.33780251382835e-06	2.60400885413031e-05	31975	chr6	118561537	118562863	1327	*	6.67	6.86	6.45	-0.41	0.16	0.488	131.68	100.28	91.29	83	Promoter (<=1kb)	6	118502564	118562256	59693	2	232339	uc009dlr.1	0	ENSMUSG00000007827	ankyrin repeat domain 26	uc009dlr.1;uc012erf.1	232339;232339	0;0	Unchanged	FGF_down	Unchanged
Ankrd27	17.4693152600384	0.49594319272155	0.474698187830353	1.04475476299646	0.296136327344581	0.441214333635307	33356	chr7	35586241	35587504	1264	*	7.25	6.84	7.57	0.73	0.00536	0.0526	132.6	96.11	168.32	212	Promoter (<=1kb)	7	35586247	35609114	22868	1	245886	uc009gkc.1	0	ENSMUSG00000034867	ankyrin repeat domain 27 (VPS9 domain)	uc009gkb.3;uc009gkc.1;uc012fil.1;uc009gkd.1;uc012fin.1	243923;245886;245886;245886;245886	0;0;0;0;0	Unchanged	Unchanged	Unchanged
Ankrd28	571.252869484082	0.0666473833560754	0.179058933182169	0.372209206051007	0.709737092305755	0.810121070312137	11392	chr14	31829400	31830711	1312	*	7.31	7.29	7.33	0.03	0.888	0.972	166.67	147.08	153.1	168	Promoter (<=1kb)	14	31700015	31830415	130401	2	105522	uc007sya.1	0	ENSMUSG00000014496	ankyrin repeat domain 28	uc007sya.1	105522	0	Unchanged	Unchanged	Unchanged
Ankrd29	23.3585048988243	-1.01933305865875	0.455746841405672	-2.23662122487736	0.0253111065038667	0.0635275818845474	17531	chr18	12305435	12305666	232	*	3.19	3.08	3.29	0.21	0.806	0.949	11.05	5.85	8.56	11	Promoter (<=1kb)	18	12252357	12305720	53364	2	225187	uc008ecd.2	54	ENSMUSG00000057766	ankyrin repeat domain 29	uc008ecd.2	225187	0	Unchanged	Unchanged	Unchanged
Ankrd34a	81.3614645134086	-0.687058143102394	0.253241544685549	-2.71305462125307	0.00666661168749155	0.0207877231643358	24268	chr3	96594958	96596984	2027	*	7.59	7.45	7.72	0.28	0.262	0.624	205.34	143.74	193.04	230	Promoter (<=1kb)	3	96596636	96599778	3143	1	545554	uc008qng.1	0	ENSMUSG00000049097	ankyrin repeat domain 34A	uc008qnh.1;uc008qng.1;uc008qnf.3;uc056ztt.1	280411;545554;69870;69870	0;0;0;0	Unchanged	FGF_down	Unchanged
Ankrd37	5.73265239640824	-0.0662939432455794	0.949955599310708	-0.0697863597979553	0.944363704011571	0.967432501101079	35932	chr8	45999288	46000962	1675	*	6.88	6.92	6.84	-0.08	0.781	0.943	142.73	99.45	116.97	112	Promoter (<=1kb)	8	45996908	45999850	2943	2	654824	uc009lpr.1	0	ENSMUSG00000050914	ankyrin repeat domain 37	uc009lpp.3;uc009lpq.3;uc009lpr.1;uc009lps.1	192169;192169;654824;67620	0;0;0;0	Unchanged	Unchanged	Unchanged
Ankrd39	81.2869964461857	-0.0207088801231192	0.234745287275367	-0.0882185127696587	0.929703003619589	0.95824511031919	173	chr1	36546302	36547219	918	*	6.21	6.2	6.21	0.01	0.987	0.997	85.64	61.84	58.01	90	Promoter (<=1kb)	1	36538171	36547252	9082	2	109346	uc007aqo.2	33	ENSMUSG00000079610	ankyrin repeat domain 39	uc007aqo.2;uc007aqp.2;uc011wjm.2;uc007aqq.4;uc056ycm.1;uc007aqr.4	109346;109346;109346;20353;20353;20353	0;0;0;0;0;0	Unchanged	Unchanged	Unchanged
Ankrd40	847.11111349979	0.00123337030265463	0.117801449622099	0.0104699076845932	0.991646374925003	0.996067787313406	6370	chr11	94326535	94329121	2587	*	8.36	8.35	8.37	0.02	0.909	0.977	376.62	274.11	358.5	303	Promoter (<=1kb)	11	94328001	94339509	11509	1	71452	uc007kyk.1	0	ENSMUSG00000020864	ankyrin repeat domain 40	uc007kyh.1;uc007kyj.1;uc007kyk.1;uc007kyl.1	67684;67684;71452;71452	0;0;0;0	Unchanged	Unchanged	Unchanged
Ankrd42	12.9768389139647	-0.971298801702389	0.584784001897832	-1.66095310157285	0.0967228661096137	0.186848504241491	34155	chr7	92636341	92638044	1704	*	6.96	7.03	6.89	-0.14	0.64	0.892	161.14	99.45	124.57	112	Promoter (<=1kb)	7	92581723	92637142	55420	2	73845	uc009ihx.2	0	ENSMUSG00000041343	ankyrin repeat domain 42	uc009ihx.2;uc009ihy.2;uc009ihz.2;uc009iia.2;uc012foz.2;uc012fpa.2	73845;73845;73845;73845;73845;73845	0;0;0;0;0;0	Unchanged	Unchanged	Unchanged
Ankrd44	115.412955506868	0.0864482357539453	0.209181855803756	0.413268327799169	0.679410032043601	0.788226432050584	314	chr1	54925574	54926605	1032	*	5.44	5.49	5.38	-0.12	0.784	0.944	53.41	36.77	37.09	46	Promoter (<=1kb)	1	54645340	54926387	281048	2	329154	uc011wkz.1	0	ENSMUSG00000052331	ankyrin repeat domain 44	uc011wkz.1;uc007azu.2;uc007azv.2	329154;329154;329154	0;0;0	Unchanged	Unchanged	Unchanged
Ankrd50	138.699796671435	0.351007343100224	0.242536553948234	1.4472348080576	0.147831170742314	0.261411178090271	23413	chr3	38484161	38484872	712	*	5.49	5.37	5.61	0.24	0.554	0.853	45.12	37.61	46.6	51	Promoter (<=1kb)	3	38449261	38484816	35556	2	99696	uc008pbd.2	0	ENSMUSG00000044864	ankyrin repeat domain 50	uc008pbd.2	99696	0	Unchanged	Unchanged	Unchanged
Ankrd52	2014.89951371081	-0.0610817320906824	0.14086242038302	-0.433626881638089	0.664559410828204	0.775892749655045	4377	chr10	128375906	128378116	2211	*	7.98	8.18	7.76	-0.42	0.0946	0.361	347.15	233.16	180.68	252	Promoter (<=1kb)	10	128377124	128385496	8373	1	237615	uc007hml.1	0	ENSMUSG00000014498	ankyrin repeat domain 52	uc033ftd.1;uc007hml.1;uc007hmm.1	102465551;237615;237615	-4722;0;0	Unchanged	Unchanged	Unchanged
Ankrd54	192.027422507538	-0.0222380508720186	0.17307751914708	-0.128486073648426	0.897764318494051	0.937288533773664	13500	chr15	79062060	79062902	843	*	6.77	6.66	6.87	0.22	0.455	0.794	120.63	81.06	113.16	121	Promoter (<=1kb)	15	79053094	79062859	9766	2	223690	uc007wsi.1	0	ENSMUSG00000033055	ankyrin repeat domain 54	uc007wsi.1;uc007wsj.1	223690;223690	0;0	Unchanged	Unchanged	Unchanged
Ankrd55	33.8563781890698	-0.0808310878615268	0.362060224812058	-0.223253156028077	0.823338483218192	0.890276347104075	10827	chr13	112318421	112319175	755	*	4.7	4.2	5.06	0.86	0.112	0.399	18.42	18.39	41.84	25	Promoter (<=1kb)	13	112318425	112339874	21450	1	77318	uc007rwe.1	0	ENSMUSG00000049985	ankyrin repeat domain 55	uc011zen.1;uc007rwd.2;uc011zeo.1;uc007rwc.1;uc007rwe.1	77318;77318;77318;77318;77318	0;0;0;0;0	Unchanged	Unchanged	Unchanged
Ankrd9	127.58444963432	-0.141677832658013	0.201088956672418	-0.704553024703447	0.481088440816229	0.621734584108493	9042	chr12	110977914	110979866	1953	*	7.99	7.98	7.99	0	0.984	0.997	305.71	200.57	243.44	264	Promoter (<=1kb)	12	110975353	110979021	3669	2	74251	uc007pci.1	0	ENSMUSG00000037904	ankyrin repeat domain 9	uc007pci.1;uc007pcj.1	74251;74251	0;0	Unchanged	Unchanged	Unchanged
Anks1	309.108817632697	0.214347005309386	0.15002830198077	1.42871046648825	0.153087468280167	0.268206013029106	16168	chr17	27908818	27910367	1550	*	7.19	7	7.36	0.36	0.151	0.473	139.04	117.83	158.81	170	Promoter (<=1kb)	17	27909306	28062779	153474	1	224650	uc008bpv.2	0	ENSMUSG00000024219	ankyrin repeat and SAM domain containing 1	uc008bpv.2;uc008bpw.2;uc008bpx.2;uc008bpu.1	224650;224650;224650;68776	0;0;0;0	Unchanged	Unchanged	Unchanged
Anks3	333.787747506804	0.303711576272422	0.166571912745321	1.82330605002285	0.0682570505109974	0.141314440967857	14358	chr16	4963035	4964256	1222	*	6.6	6.5	6.7	0.19	0.534	0.842	102.21	79.39	82.73	125	Promoter (<=1kb)	16	4941415	4964237	22823	2	72615	uc007ybc.2	0	ENSMUSG00000022515	ankyrin repeat and sterile alpha motif domain containing 3	uc007ybc.2;uc007ybd.2;uc007ybe.2;uc007ybf.3	72615;72615;72615;74684	0;0;0;0	Unchanged	Unchanged	Unchanged
Anln	639.146400538882	-1.30380198208835	0.15027434808359	-8.67614465619312	4.09411348604041e-18	1.85351683277102e-16	37846	chr9	22386200	22391411	5212	*	9.2	9.27	9.13	-0.14	0.48	0.81	694.3	538.2	581.97	539	Promoter (<=1kb)	9	22331214	22389206	57993	2	68743	uc009ook.2	0	ENSMUSG00000036777	anillin, actin binding protein	uc009ook.2	68743	0	Unchanged	FGF_down	Unchanged
Ano10	545.55007954798	-0.778246991429448	0.13917963408416	-5.59167292363228	2.24892162464016e-08	2.73997056653407e-07	39782	chr9	122293546	122294424	879	*	6.86	6.81	6.91	0.1	0.717	0.924	121.55	102.79	102.7	138	Promoter (<=1kb)	9	122175874	122294423	118550	2	102566	uc009ser.2	0	ENSMUSG00000037949	anoctamin 10	uc009ser.2;uc009ses.2;uc009set.2	102566;102566;102566	0;0;0	Unchanged	FGF_down	Unchanged
Ano6	3233.3707460397	0.27389215507799	0.152599911735745	1.79483822737909	0.0726794782379475	0.14864221832648	13898	chr15	95789381	95792327	2947	*	8.14	8.17	8.11	-0.06	0.776	0.942	321.37	254.05	295.74	255	Promoter (<=1kb)	15	95790843	95975472	184630	1	105722	uc007xju.2	0	ENSMUSG00000064210	anoctamin 6	uc007xju.2;uc007xjv.2;uc011zyg.2	105722;105722;105722	0;0;0	Unchanged	Unchanged	Unchanged
Ano8	394.52762411538	-0.292356575995162	0.181521036375768	-1.61059336059515	0.107268381884111	0.203217139136837	36242	chr8	71486135	71486461	327	*	3.69	3.37	3.95	0.58	0.448	0.789	7.37	13.37	19.97	11	Promoter (<=1kb)	8	71476019	71486067	10049	2	382014	uc009mdm.2	-68	ENSMUSG00000034863	anoctamin 8	uc009mdl.2;uc009mdm.2;uc009mdn.1;uc009mdo.1	382014;382014;70359;70359	0;0;0;0	Unchanged	Unchanged	Unchanged
Anp32a	369.381918425134	-0.757684038546725	0.174879337142746	-4.33261042114004	1.47351717271545e-05	9.8940883417388e-05	38519	chr9	62341376	62345507	4132	*	8.94	9.03	8.84	-0.18	0.358	0.718	581.96	461.31	425.07	494	Promoter (<=1kb)	9	62341343	62378802	37460	1	11737	uc009qah.4	33	ENSMUSG00000032249	acidic (leucine-rich) nuclear phosphoprotein 32 family, member A	uc009qah.4	11737	0	Unchanged	FGF_down	Unchanged
Anp32b	2090.54846249489	0.312677010459036	0.162938456335771	1.91898841741017	0.0549857997080762	0.118819431949182	25459	chr4	46449940	46454501	4562	*	9.68	9.73	9.63	-0.1	0.629	0.888	1017.51	679.43	732.22	849	Promoter (<=1kb)	4	46451117	46472523	21407	1	67628	uc008stt.1	0	ENSMUSG00000028333	acidic (leucine-rich) nuclear phosphoprotein 32 family, member B	uc008stt.1;uc012dds.1	67628;67628	0;0	Unchanged	Unchanged	Unchanged
Anp32e	1133.91060948048	0.182769200118826	0.131207169881178	1.39298180339034	0.163625293343621	0.281550461566794	24214	chr3	95929249	95930850	1602	*	8.28	8.26	8.31	0.04	0.84	0.96	346.23	268.26	290.99	342	Promoter (<=1kb)	3	95929257	95947387	18131	1	66471	uc008qlu.2	0	ENSMUSG00000015749	acidic (leucine-rich) nuclear phosphoprotein 32 family, member E	uc008qlu.2;uc008qlv.2;uc029uns.1	66471;66471;66471	0;0;0	Unchanged	Unchanged	Unchanged
Anpep	836.109785604815	-0.144399056870648	0.141045955184304	-1.02377311481185	0.305942451827192	0.452104869465702	33928	chr7	79847830	79848517	688	*	4.48	3.98	4.84	0.86	0.127	0.431	16.57	15.04	30.43	27	Promoter (<=1kb)	7	79821803	79848194	26392	2	16790	uc009hze.1	0	ENSMUSG00000039062	alanyl (membrane) aminopeptidase	uc009hze.1	16790	0	Unchanged	Unchanged	Unchanged
Antxr1	439.420157528052	-0.816139357550546	0.165471184630067	-4.93221438750881	8.13026099489623e-07	7.31172907531977e-06	31524	chr6	87335176	87335787	612	*	4.61	4.77	4.42	-0.36	0.518	0.834	22.1	32.59	25.68	17	Promoter (<=1kb)	6	87133853	87335775	201923	2	69538	uc009cte.1	0	ENSMUSG00000033420	anthrax toxin receptor 1	uc009cte.1;uc009ctf.1;uc009ctg.1	69538;69538;69538	0;0;0	Unchanged	FGF_down	Unchanged
Antxr2	6610.37851038969	1.22072002638132	0.207287328254059	5.8890238813111	3.88483312524357e-09	5.46253241328367e-08	28691	chr5	98029800	98032060	2261	*	7.72	7.58	7.84	0.26	0.249	0.608	203.5	179.68	247.24	211	Promoter (<=1kb)	5	97884688	98030962	146275	2	71914	uc008yga.1	0	ENSMUSG00000029338	anthrax toxin receptor 2	uc008yga.1	71914	0	Unchanged	FGF_up	Unchanged
Anxa1	2223.54104400567	-0.233154314652119	0.162655041218759	-1.43342814895325	0.151735518795824	0.266501531322218	19157	chr19	20388559	20391780	3222	*	8.13	8.29	7.95	-0.34	0.115	0.405	347.15	278.29	262.46	231	Promoter (<=1kb)	19	20373434	20390671	17238	2	16952	uc008gyi.1	0	ENSMUSG00000024659	annexin A1	uc008gyi.1	16952	0	Unchanged	Unchanged	Unchanged
Anxa11	426.290441773661	0.199596638684206	0.155135305566958	1.28659712858243	0.198234745059908	0.325946027370479	11234	chr14	25841841	25843026	1186	*	7.36	7.26	7.44	0.18	0.472	0.805	179.56	127.86	185.43	163	Promoter (<=1kb)	14	25842155	25882301	40147	1	11744	uc007sru.2	0	ENSMUSG00000021866	annexin A11	uc007sru.2;uc007srv.2	11744;11744	0;0	Unchanged	Unchanged	Unchanged
Anxa2	8389.00107578296	0.712250953867552	0.107112031107214	6.64958872038031	2.93913139560428e-11	5.71195096589631e-10	38798	chr9	69475739	69478975	3237	*	7.07	6.84	7.27	0.43	0.105	0.384	131.68	97.78	151.2	157	Promoter (<=1kb)	9	69478465	69491785	13321	1	12306	uc009qnh.1	0	ENSMUSG00000032231	annexin A2	uc009qng.1;uc009qnh.1	12306;12306	0;0	Unchanged	FGF_up	Unchanged
Anxa5	5967.24169594702	0.425732234357308	0.167680568044419	2.53894794920142	0.0111186363883442	0.0321767414318376	23386	chr3	36472245	36472815	571	*	3.53	4.2	2.26	-1.94	0.0301	0.175	17.5	19.22	8.56	1	Intron (uc008ozj.3/11747, intron 2 of 12)	3	36448923	36475887	26965	2	11747	uc008ozj.3	3072	ENSMUSG00000027712	annexin A5	uc033hsz.1;uc008ozj.3;uc029uli.1	102466786;11747;72282	0;0;0	Unchanged	FGF_up	Unchanged
Anxa7	331.514299898033	0.708987993510308	0.153785066895056	4.61025252857696	4.02180135234011e-06	3.07934463569308e-05	11010	chr14	20478301	20480348	2048	*	7.12	7.01	7.23	0.22	0.388	0.744	146.41	111.15	148.35	152	Promoter (<=1kb)	14	20455261	20480133	24873	2	11750	uc007sjr.2	0	ENSMUSG00000021814	annexin A7	uc007sjr.2;uc007sjs.2;uc007sjt.2;uc007sju.2;uc007sjv.2;uc007sjw.2	11750;11750;11750;11750;11750;74843	0;0;0;0;0;16553	Unchanged	FGF_up	Unchanged
Aoc3	12.0784076480272	0.824687728965347	0.774727908128976	1.06448692542525	0.28710817421555	0.430714403122259	6750	chr11	101337863	101338573	711	*	4.55	4.33	4.74	0.42	0.464	0.799	27.62	12.54	26.63	27	3' UTR	11	101330606	101339430	8825	1	11754	uc007lop.2	7257	ENSMUSG00000019326	amine oxidase, copper containing 3	uc007lop.2;uc007loq.1	11754;11754	0;0	Unchanged	Unchanged	Unchanged
Aox1	202.762014846229	-0.832229006854546	0.237245292956266	-3.5078841669915	0.000451685672237887	0.00205580622794639	344	chr1	58029201	58031324	2124	*	7.84	8.04	7.6	-0.44	0.054	0.255	290.98	235.67	177.83	211	Promoter (<=1kb)	1	58029969	58106410	76442	1	11761	uc007bbl.1	0	ENSMUSG00000063558	aldehyde oxidase 1	uc007bbl.1;uc011wlj.1;uc007bbk.2	11761;68549;68549	0;0;33227	Unchanged	FGF_down	Unchanged
Ap1g1	1172.48685867821	0.324951804709233	0.115105458105091	2.82307902734336	0.00475648455749221	0.015673973926426	36931	chr8	109778570	109779994	1425	*	8.06	8.05	8.07	0.02	0.921	0.98	287.3	244.03	253.9	285	Promoter (<=1kb)	8	109778583	109829755	51173	1	11765	uc057lxv.1	0	ENSMUSG00000031731	adaptor protein complex AP-1, gamma 1 subunit	uc057lxv.1;uc012gkl.4;uc033jhq.3	11765;11765;11765	0;0;0	Unchanged	FGF_up	Unchanged
Ap1g2	266.76854806807	-0.476951842831773	0.189120175208518	-2.52195114723165	0.0116705914937147	0.0334044651260912	11692	chr14	55105551	55106842	1292	*	6.6	6.65	6.55	-0.1	0.747	0.932	114.18	86.91	97.95	90	Promoter (<=1kb)	14	55098835	55106267	7433	2	11766	uc007tyd.3	0	ENSMUSG00000040701	adaptor protein complex AP-1, gamma 2 subunit	uc007tyd.3;uc007tye.3;uc007tyf.3;uc007tyg.1;uc007tyh.2;uc007tyj.2	11766;11766;11766;319984;319984;319984	0;0;0;0;0;10093	Unchanged	FGF_down	Unchanged
Ap1m1	474.021595724804	0.0686603275827366	0.132387920905981	0.518629850162067	0.604018888994454	0.726500328193792	36280	chr8	72239117	72240993	1877	*	7.31	7.33	7.3	-0.04	0.889	0.972	190.61	132.04	150.25	164	Promoter (<=1kb)	8	72240132	72257379	17248	1	11767	uc009mfp.1	0	ENSMUSG00000003033	adaptor-related protein complex AP-1, mu subunit 1	uc009mfp.1	11767	0	Unchanged	Unchanged	Unchanged
Ap1m2	32.160396705981	-0.602590766458129	0.375300671102991	-1.60562134005021	0.108357133748605	0.204691712116853	37774	chr9	21308830	21310842	2013	*	7.34	7.26	7.42	0.17	0.477	0.808	159.3	146.25	169.27	174	Promoter (1-2kb)	9	21295457	21312333	16877	2	11768	uc009okx.2	1491	ENSMUSG00000003309	adaptor protein complex AP-1, mu 2 subunit	uc009okx.2;uc009oky.2;uc012gpe.1	11768;11768;11768	0;0;0	Unchanged	Unchanged	Unchanged
Ap1s1	1512.01088042268	0.727301617331788	0.114615851333947	6.34555874137085	2.21619613413227e-10	3.75715974399275e-09	29802	chr5	137044752	137046055	1304	*	7.3	7.14	7.44	0.3	0.24	0.597	167.59	113.66	174.97	172	Promoter (<=1kb)	5	137034994	137046060	11067	2	11769	uc009abm.1	5	ENSMUSG00000004849	adaptor protein complex AP-1, sigma 1	uc009abm.1	11769	0	Unchanged	FGF_up	Unchanged
Ap1s2	105.724839772317	-0.843155558077415	0.216047910127508	-3.90263232622708	9.51521872912154e-05	0.000521678413992939	40699	chrX	163909139	163909658	520	*	5.51	5.4	5.61	0.2	0.619	0.884	48.8	35.94	51.35	46	Promoter (<=1kb)	20	163909017	163929546	20530	1	108012	uc009uuw.2	122	ENSMUSG00000031367	adaptor-related protein complex 1, sigma 2 subunit	uc009uuw.2;uc009uux.2;uc009uuy.2	108012;108012;108012	0;0;0	Unchanged	FGF_down	Unchanged
Ap2a1	1396.19942590717	-0.116858202498559	0.156916006565934	-0.744718177934615	0.456442107683479	0.600528226151836	33477	chr7	44928759	44929505	747	*	6.86	6.7	7	0.29	0.346	0.709	132.6	76.05	109.36	146	Promoter (<=1kb)	7	44900373	44929490	29118	2	11771	uc009grv.1	0	ENSMUSG00000060279	adaptor-related protein complex 2, alpha 1 subunit	uc009grv.1;uc009grw.1	11771;11771	0;0	Unchanged	Unchanged	Unchanged
Ap2b1	1718.94716689327	0.15573204195706	0.134099648779245	1.16131580786932	0.24551349322574	0.38332818694109	6114	chr11	83301707	83303726	2020	*	7.92	7.73	8.08	0.35	0.124	0.425	243.1	182.18	252	290	Promoter (<=1kb)	11	83302697	83344580	41884	1	71770	uc007kor.1	0	ENSMUSG00000035152	adaptor-related protein complex 2, beta 1 subunit	uc007kon.1;uc007koo.1;uc007kop.1;uc007koq.1;uc007kor.1;uc007kos.1;uc007kot.2;uc007kou.2	103737;103737;103737;103737;71770;71770;71770;71770	0;0;0;0;0;0;0;0	Unchanged	Unchanged	Unchanged
Ap2m1	727.705684801168	0.0910164611567955	0.121831231461599	0.74707002518877	0.455021292720318	0.599472496758514	14637	chr16	20535472	20538339	2868	*	8.45	8.33	8.56	0.24	0.269	0.632	375.7	265.75	366.11	391	Promoter (<=1kb)	16	20535480	20544909	9430	1	11773	uc007ypy.2	0	ENSMUSG00000022841	adaptor-related protein complex 2, mu 1 subunit	uc007ypy.2;uc033gyi.3;uc007ypw.1;uc007ypx.2	11773;11773;13544;13544	0;0;0;0	Unchanged	Unchanged	Unchanged
Ap2s1	330.1445113441	0.0542262526239038	0.168193015497263	0.322404901675518	0.747145971320585	0.838059481400514	32827	chr7	16738423	16739012	590	*	4.88	4.54	5.16	0.61	0.213	0.566	24.86	21.73	33.28	38	Promoter (<=1kb)	7	16738444	16749290	10847	1	232910	uc012faj.1	0	ENSMUSG00000008036	adaptor-related protein complex 2, sigma 1 subunit	uc012faj.1	232910	0	Unchanged	Unchanged	Unchanged
Ap3b1	629.050392955678	0.261363046871459	0.153901920717191	1.69824421718387	0.0894616782300145	0.175401243143887	10499	chr13	94358032	94359719	1688	*	7.51	7.46	7.56	0.1	0.67	0.907	194.29	157.11	168.32	209	Promoter (<=1kb)	13	94358960	94566316	207357	1	11774	uc007rlv.2	0	ENSMUSG00000021686	adaptor-related protein complex 3, beta 1 subunit	uc007rlv.2;uc029scr.2	11774;328309	0;0	Unchanged	Unchanged	Unchanged
Ap3d1	1030.82268010012	-0.249678229425325	0.1371357107836	-1.82066529570344	0.0686577506272149	0.142018535667879	3517	chr10	80740779	80742235	1457	*	6.53	6.51	6.55	0.03	0.913	0.979	104.97	77.72	77.98	109	Promoter (<=1kb)	10	80706978	80742211	35234	2	11776	uc007gek.1	0	ENSMUSG00000020198	adaptor-related protein complex 3, delta 1 subunit	uc007gek.1	11776	0	Unchanged	Unchanged	Unchanged
Ap3m2	110.674800070059	0.0554382918830053	0.216069736691653	0.256575921884515	0.797506164435493	0.873647265646437	35613	chr8	22805197	22805565	369	*	3.82	3.96	3.66	-0.3	0.683	0.911	21.18	10.03	13.31	12	Promoter (<=1kb)	8	22787354	22805654	18301	2	64933	uc009ldy.2	89	ENSMUSG00000031539	adaptor-related protein complex 3, mu 2 subunit	uc009ldy.2;uc009ldz.2;uc009lea.2;uc009leb.2	64933;64933;64933;64933	0;0;0;0	Unchanged	Unchanged	Unchanged
Ap3s1	81.6351628795784	0.66319152983928	0.28101402676242	2.3599944012758	0.0182752108703345	0.0486037650917307	17980	chr18	46740418	46742704	2287	*	8.07	8.01	8.13	0.12	0.611	0.88	304.79	212.27	271.97	288	Promoter (<=1kb)	18	46741876	46790826	48951	1	11777	uc008evv.2	0	ENSMUSG00000024480	adaptor-related protein complex 3, sigma 1 subunit	uc008evv.2;uc008evw.2;uc012bct.2;uc008evu.1	11777;11777;11777;67526	0;0;0;0	Unchanged	FGF_up	Unchanged
Ap3s2	272.050594165524	-0.395823128616409	0.159669755800111	-2.47901129824447	0.0131747132840462	0.0369235683623424	33932	chr7	79920255	79921145	891	*	5.68	5.82	5.52	-0.3	0.441	0.784	63.54	49.31	44.69	47	Promoter (<=1kb)	7	79875325	79920640	45316	2	11778	uc009hzf.2	0	ENSMUSG00000063801	adaptor-related protein complex 3, sigma 2 subunit	uc009hzf.2;uc009hzh.1	11778;70420	0;0	Unchanged	FGF_down	Unchanged
Ap4e1	203.702609736933	-0.0270661676932791	0.174332664082734	-0.155255860028814	0.876619612183289	0.925071305387134	21967	chr2	127006824	127009337	2514	*	7.26	7.39	7.13	-0.25	0.322	0.688	190.61	143.74	148.35	132	Promoter (<=1kb)	2	127008711	127013572	4862	1	108011	uc008mel.1	0	ENSMUSG00000001998	adaptor-related protein complex AP-4, epsilon 1	uc008mel.1;uc008mem.1;uc008men.1;uc008meo.1	108011;108011;108011;108011	0;0;0;0	Unchanged	Unchanged	Unchanged
Ap4m1	190.98309737219	-0.00318825627117662	0.21900029905971	-0.0145582279333206	0.98838462499844	0.994536893343567	29874	chr5	138170272	138173031	2760	*	8.48	8.56	8.4	-0.16	0.421	0.77	413.45	341.8	328.07	347	Promoter (<=1kb)	5	138172021	138178687	6667	1	11781	uc009aev.3	0	ENSMUSG00000019518	adaptor-related protein complex AP-4, mu 1	uc009aev.3;uc009aeu.1;uc012efh.1;uc012efi.1;uc012efg.1	11781;17220;723885;723925;723926	0;0;-4662;-4454;-4868	Unchanged	Unchanged	Unchanged
Ap5b1	210.410270476933	0.296252914623712	0.178594570566772	1.65880134924343	0.0971558283893135	0.18753334317007	18792	chr19	5566531	5569016	2486	*	8.83	8.75	8.91	0.17	0.484	0.812	531.31	329.27	425.07	540	Promoter (<=1kb)	19	5568025	5571261	3237	1	381201	uc008gdv.1	0	ENSMUSG00000049562	adaptor-related protein complex 5, beta 1 subunit	uc008gdv.1;uc008gdw.1	381201;381201	0;0	Unchanged	Unchanged	Unchanged
Ap5m1	168.436507497825	0.49232716434252	0.194319783149274	2.53359259856892	0.01128999065471	0.0325386950337819	11595	chr14	49073285	49074506	1222	*	5.71	5.56	5.85	0.29	0.444	0.786	44.2	50.14	65.61	50	5' UTR	14	49066495	49076041	9547	1	74385	uc007tjx.2	6790	ENSMUSG00000036291	adaptor-related protein complex 5, mu 1 subunit	uc007tjx.2;uc007tjy.2;uc007tjz.2;uc007tka.2	74385;74385;74385;74385	0;0;0;0	Unchanged	FGF_up	Unchanged
Ap5z1	305.690922116814	0.283351609690367	0.171033177306966	1.65670552434289	0.0975790255793978	0.188259001408388	30041	chr5	142462895	142464857	1963	*	7.58	7.34	7.79	0.45	0.0474	0.235	166.67	157.11	228.23	213	Promoter (<=1kb)	5	142463931	142470701	6771	1	231855	uc009aip.1	0	ENSMUSG00000039623	adaptor-related protein complex 5, zeta 1 subunit	uc009aio.1;uc009aip.1;uc009aiq.1;uc012ege.1	17425;231855;231855;231855	0;0;0;0	Unchanged	Unchanged	Unchanged
Apaf1	124.293128972739	-0.064218577923159	0.228821405165109	-0.280649346929852	0.778979363073983	0.860477019173775	3778	chr10	91081785	91082719	935	*	5.92	5.76	6.06	0.3	0.444	0.787	69.98	38.44	57.06	76	Promoter (<=1kb)	10	90989311	91082743	93433	2	11783	uc007gtg.1	24	ENSMUSG00000019979	apoptotic peptidase activating factor 1	uc007gtg.1;uc007gth.1;uc007gti.1;uc007gtj.1;uc007gtk.1;uc007gtl.1;uc007gtm.1	11783;11783;11783;11783;11783;67454;67454	0;0;0;0;0;0;0	Unchanged	Unchanged	Unchanged
Apba1	12.8016820832237	3.17389470471638	0.720519413307753	4.40500928371339	1.05779347612781e-05	7.3213606880944e-05	19228	chr19	23758395	23758982	588	*	5.51	5.51	5.5	-0.01	0.985	0.997	56.17	35.1	48.5	42	Promoter (<=1kb)	19	23758876	23949597	190722	1	319924	uc008hai.1	0	ENSMUSG00000024897	amyloid beta (A4) precursor protein binding, family A, member 1	uc008hai.1;uc012bjp.1	319924;319924	0;0	Unchanged	FGF_up	Unchanged
Apba3	268.676268046583	0.0859754791486083	0.160562001239191	0.535465916499942	0.592327719964613	0.716984090441266	3578	chr10	81266087	81268774	2688	*	7.18	7.19	7.17	-0.03	0.925	0.981	159.3	133.71	159.76	128	Promoter (<=1kb)	10	81268172	81273247	5076	1	57267	uc007ggz.2	0	ENSMUSG00000004931	amyloid beta (A4) precursor protein-binding, family A, member 3	uc011xje.1;uc007ggt.1;uc007ggv.2;uc007ggw.2;uc007ggx.2;uc033frl.1;uc007gha.2;uc007ghb.2;uc007ggz.2;uc007ggy.1	100526465;17179;17179;17179;17179;27375;27375;27375;57267;66047	-2823;13152;8788;8788;8788;17007;0;0;0;0	Unchanged	Unchanged	Unchanged
Apbb1	83.6109734489195	-1.16985072536907	0.248688847993248	-4.70407392534481	2.55020838865611e-06	2.04290151884838e-05	34439	chr7	105581038	105581534	497	*	4.28	4.27	4.29	0.01	0.992	0.998	11.97	26.74	18.07	21	Promoter (<=1kb)	7	105558465	105581491	23027	2	11785	uc009iyi.2	0	ENSMUSG00000037032	amyloid beta (A4) precursor protein-binding, family B, member 1	uc009iyi.2;uc057luw.1;uc009iyj.2	11785;11785;11785	0;0;0	Unchanged	FGF_down	Unchanged
Apbb2	3157.10097754078	1.30437001216317	0.19860087234574	6.56779598577204	5.10654382597789e-11	9.47723785839872e-10	28453	chr5	66541439	66557602	16164	*	10.31	9.88	10.65	0.77	7.33e-06	0.000304	964.1	914.26	1772.55	1440	Promoter (<=1kb)	5	66462098	66543617	81520	2	11787	uc012dwr.1	0	ENSMUSG00000029207	amyloid beta (A4) precursor protein-binding, family B, member 2	uc008xoy.2;uc008xoz.2;uc008xpa.2;uc008xpb.2;uc033ijy.2;uc057lmg.1;uc008xpc.2;uc008xpd.2;uc012dwr.1	11787;11787;11787;11787;11787;11787;11787;11787;11787	0;0;0;0;0;0;0;0;0	Unchanged	FGF_up	FGF_up
Apc	1807.80085124561	1.16683633568967	0.162733674124971	7.17022055799958	7.48770356434511e-13	1.82266869655912e-11	17691	chr18	34220546	34222591	2046	*	7.83	7.66	7.97	0.31	0.207	0.557	240.33	165.47	223.47	279	Promoter (<=1kb)	18	34220984	34300202	79219	1	11789	uc008ekd.1	0	ENSMUSG00000005871	adenomatosis polyposis coli	uc008ekd.1;uc008eke.2;uc008ekc.1	11789;11789;633395	0;0;0	Unchanged	FGF_up	Unchanged
Apcdd1	788.490911766338	-0.430095495752578	0.206237562081715	-2.08543725697342	0.0370296279096309	0.0865086225128829	18189	chr18	62921548	62923063	1516	*	6.41	6.51	6.31	-0.2	0.524	0.837	95.77	86.08	88.44	70	Promoter (<=1kb)	18	62922327	62953195	30869	1	494504	uc008fdl.1	0	ENSMUSG00000071847	adenomatosis polyposis coli down-regulated 1	uc008fdl.1	494504	0	Unchanged	Unchanged	Unchanged
Apeh	524.210534720235	0.0771717138651459	0.130867406109478	0.589693921193697	0.555395871345226	0.686320456401793	39470	chr9	108093815	108094509	695	*	5.85	5.73	5.97	0.23	0.543	0.847	67.22	39.28	58.96	66	Promoter (<=1kb)	9	108085414	108094480	9067	2	235606	uc009ros.2	0	ENSMUSG00000032590	acylpeptide hydrolase	uc009rov.1;uc009ros.2;uc009rot.2;uc009rou.2	12217;235606;235606;235606	0;0;0;0	Unchanged	Unchanged	Unchanged
Apex1	529.136851874796	-0.366766904339815	0.179979557405398	-2.03782534876271	0.0415674023573067	0.0948841850600707	11602	chr14	50923472	50926026	2555	*	8.12	8.19	8.05	-0.15	0.571	0.862	372.93	212.27	261.51	267	Promoter (<=1kb)	14	50924949	50927188	2240	1	11792	uc007tly.2	0	ENSMUSG00000035960	apurinic/apyrimidinic endonuclease 1	uc007tly.2;uc007tlz.2;uc007tma.2;uc007tmb.2;uc007tmc.2;uc007tmd.2;uc029sja.1;uc007tlx.1	11792;219024;219024;219024;219024;219024;66246;66246	0;3183;0;0;0;0;0;0	Unchanged	Unchanged	Unchanged
Apex2	374.446505036871	0.999062111545071	0.151200088486525	6.60754978085946	3.90732817276026e-11	7.44822748338606e-10	40599	chrX	150586939	150589080	2142	*	7.8	7.92	7.67	-0.25	0.286	0.653	273.48	209.76	218.72	188	Promoter (<=1kb)	20	150571507	150588085	16579	2	77622	uc009uol.1	0	ENSMUSG00000025269	apurinic/apyrimidinic endonuclease 2	uc009uoo.2;uc009uoi.1;uc009uol.1;uc009uom.1;uc012hqo.1;uc009uon.1	18639;77622;77622;77622;77622;77622	-841;0;0;0;0;0	Unchanged	FGF_up	Unchanged
Aph1a	477.064090897256	-0.218438163165614	0.154008512499219	-1.41835123020698	0.156088246659938	0.272146859821966	24211	chr3	95893948	95895249	1302	*	7.03	7.04	7.01	-0.02	0.935	0.984	146.41	116.16	126.47	132	Promoter (<=1kb)	3	95893921	95898592	4672	1	226548	uc008qlq.2	27	ENSMUSG00000015750	aph1 homolog A, gamma secretase subunit	uc008qlk.1;uc008qlq.2;uc008qlr.2;uc008qln.3;uc057lgb.1;uc008qlo.2;uc008qls.1	100042889;226548;226548;229600;229600;229600;23831	0;0;0;0;0;0;9390	Unchanged	Unchanged	Unchanged
Aph1b	201.8244788143	-1.73633690476368	0.187448794369599	-9.26299318490191	1.98780064748843e-20	1.13675566214266e-18	38723	chr9	66794620	66796631	2012	*	7.73	7.79	7.68	-0.11	0.659	0.903	256.91	184.69	207.3	203	Promoter (<=1kb)	9	66775487	66795423	19937	2	208117	uc009qfe.1	0	ENSMUSG00000032375	aph1 homolog B, gamma secretase subunit	uc009qfe.1;uc009qff.1	208117;208117	0;0	Unchanged	FGF_down	Unchanged
Aph1c	8.94492065474886	-2.54214113025558	0.818760613752652	-3.10486494777039	0.00190365922810125	0.00714814171984485	38726	chr9	66834966	66835876	911	*	5.88	6.02	5.71	-0.31	0.414	0.765	79.19	50.98	44.69	60	Promoter (<=1kb)	9	66814994	66834706	19713	2	68318	uc009qfi.1	-260	ENSMUSG00000053040	aph1 homolog C, gamma secretase subunit	uc009qfi.1	68318	0	Unchanged	FGF_down	Unchanged
Aplf	41.578138891337	-0.202687445583018	0.324326595879625	-0.624948580098087	0.532004806649308	0.665256481384446	31525	chr6	87671575	87672142	568	*	5.04	5.15	4.91	-0.24	0.639	0.891	45.12	25.91	36.14	24	Promoter (<=1kb)	6	87628429	87672168	43740	2	72103	uc009ctq.2	26	ENSMUSG00000030051	aprataxin and PNKP like factor	uc009ctt.1;uc009ctq.2;uc009ctr.2	613264;72103;72103	18705;0;0	Unchanged	Unchanged	Unchanged
Apobec1	165.948726499476	0.12783432856736	0.237409622099127	0.538454707256915	0.590263166277932	0.715312237622076	32072	chr6	122601678	122603161	1484	*	6.6	6.69	6.51	-0.18	0.55	0.851	122.47	84.41	95.09	87	Promoter (<=1kb)	6	122577792	122602444	24653	2	11810	uc009dpk.1	0	ENSMUSG00000040613	apolipoprotein B mRNA editing enzyme, catalytic polypeptide 1	uc009dpk.1;uc009dpl.1;uc009dpm.1	11810;11810;14562	0;0;6910	Unchanged	Unchanged	Unchanged
Apobr	312.850592930579	0.521502071359969	0.187978742855498	2.77426087353322	0.0055327291956328	0.0178144340911108	34929	chr7	126587016	126589055	2040	*	6.19	6.4	5.93	-0.47	0.169	0.503	94.84	74.38	51.35	71	Promoter (2-3kb)	7	126585008	126589093	4086	1	171504	uc009jsb.2	2008	ENSMUSG00000042759	apolipoprotein B receptor	uc009jrx.2;uc009jry.2;uc012ftt.1;uc009jsa.1;uc009jsb.2;uc009jsc.1	12752;12752;12752;12752;171504;246779	0;0;0;0;0;5855	Unchanged	FGF_up	Unchanged
Apoc1	2.71800982873692	1.45104905241672	1.27411652119063	1.13886683696775	0.254758699456327	0.393750934424159	32923	chr7	19694872	19695397	526	*	4.19	4.47	3.83	-0.64	0.323	0.689	27.62	16.71	10.46	18	Promoter (2-3kb)	7	19689480	19692659	3180	2	11812	uc009fmw.3	-2213	ENSMUSG00000040564	apolipoprotein C-I	uc009fmv.3;uc009fmw.3;uc057age.1;uc057agf.1;uc009fmy.3;uc057agg.1;uc009fmx.3	11812;11812;11816;11816;11816;11816;11816	-2213;-2213;3001;3224;3791;3791;3791	Unchanged	Unchanged	Unchanged
Apol10b	39.8263296823346	-2.5802720623871	0.39223047513532	-6.57845890607276	4.75349204700967e-11	8.87714639779056e-10	13404	chr15	77596167	77596555	389	*	4.68	5.07	4.14	-0.93	0.0861	0.342	37.75	29.25	15.22	20	Promoter (<=1kb)	15	77584158	77596125	11968	2	328561	uc007wnu.2	-42	ENSMUSG00000050014	apolipoprotein L 10B	uc007wnu.2	328561	-42	Unchanged	FGF_down	Unchanged
Apol6	400.769872028923	-1.29538070078748	0.158494499563994	-8.17303253015701	3.0073285242028e-16	1.12675832355084e-14	13366	chr15	77043648	77046362	2715	*	7.48	7.78	7.11	-0.67	0.00747	0.0667	247.7	191.38	122.67	154	Promoter (<=1kb)	15	77045075	77052351	7277	1	71939	uc007wmz.2	0	ENSMUSG00000033576	apolipoprotein L 6	uc007wmy.1;uc007wmz.2;uc007wna.3;uc007wnb.2	17189;71939;71939;71939	0;0;0;0	Unchanged	FGF_down	Unchanged
Apol7a	156.747882435954	-1.54739359131138	0.204606751219064	-7.56276898045582	3.94578042057266e-14	1.1474444668293e-12	13401	chr15	77397185	77399267	2083	*	7.4	7.54	7.25	-0.29	0.243	0.601	213.63	157.95	145.49	158	Promoter (<=1kb)	15	77388217	77399110	10894	2	75761	uc007wnl.2	0	ENSMUSG00000010601	apolipoprotein L 7a	uc007wnn.2;uc007wno.2;uc007wnl.2;uc007wnm.2	223672;223672;75761;75761	0;0;0;0	Unchanged	FGF_down	Unchanged
Apol9a	109.260147218214	-0.541387130933828	0.22327877486693	-2.42471381911015	0.0153204584954371	0.0419784777481578	13402	chr15	77410268	77411027	760	*	6.18	6.25	6.1	-0.16	0.63	0.888	79.19	73.54	60.86	76	Promoter (<=1kb)	15	77403789	77411034	7246	2	223672	uc007wnn.2	7	ENSMUSG00000057346	apolipoprotein L 9a	uc007wnn.2;uc007wno.2	223672;223672	0;0	Unchanged	FGF_down	Unchanged
Apol9b	63.2657547260122	-0.766116944101388	0.301624164095937	-2.53997204235172	0.0110861330397097	0.0320904485566991	13406	chr15	77729128	77729933	806	*	5.52	5.86	5.07	-0.78	0.0606	0.276	68.14	47.64	33.28	34	Promoter (<=1kb)	15	77729072	77736382	7311	1	71898	uc007wny.2	56	ENSMUSG00000068246	apolipoprotein L 9b	uc007wny.2;uc007wnz.2	71898;71898	0;0	Unchanged	FGF_down	Unchanged
Apold1	3.18175342909276	-1.96213198281641	1.19942456870479	-1.63589443972724	0.101861681904532	0.194854484974867	32322	chr6	134983195	134984729	1535	*	6.32	6.49	6.13	-0.36	0.269	0.633	103.13	76.05	64.66	75	Promoter (1-2kb)	6	134982001	134986836	4836	1	381823	uc012euq.1	1194	ENSMUSG00000090698	apolipoprotein L domain containing 1	uc012euq.1	381823	0	Unchanged	Unchanged	Unchanged
Apoo	8.51227412305053	0.398747907588655	0.711896440685498	0.560120664748223	0.575397136070503	0.702609988793896	40335	chrX	94367133	94367554	422	*	5.07	5.06	5.08	0.02	0.969	0.993	34.99	31.76	25.68	42	Promoter (<=1kb)	20	94367154	94417093	49940	1	68316	uc009ttl.3	0	ENSMUSG00000079508	apolipoprotein O	uc012hmd.2;uc009ttl.3;uc009ttm.3;uc012hme.2	68316;68316;68316;68316	0;0;0;0	Unchanged	Unchanged	Unchanged
Apool	65.2117764565309	-0.195261887321152	0.304720324599599	-0.640790493964344	0.521658809901805	0.657538257177101	40484	chrX	112311401	112312147	747	*	5.89	5.81	5.97	0.15	0.67	0.907	59.85	52.65	54.2	71	Promoter (<=1kb)	20	112311352	112348484	37133	1	68117	uc009udg.2	49	ENSMUSG00000025525	apolipoprotein O-like	uc009udg.2;uc009udh.2;uc057cfr.1;uc057cfs.1	68117;68117;68117;68117	0;0;0;0	Unchanged	Unchanged	Unchanged
Apopt1	109.512971547717	-0.600687299435349	0.230402625581161	-2.60712002704046	0.00913073476893172	0.0272485747711041	9094	chr12	111712355	111715681	3327	*	7.87	7.88	7.85	-0.03	0.886	0.971	269.8	202.24	232.03	229	Promoter (<=1kb)	12	111713269	111727116	13848	1	68020	uc007pdt.2	0	ENSMUSG00000037787	apoptogenic, mitochondrial 1	uc007pdt.2;uc007pdu.2;uc011yuy.1;uc007pdr.4;uc057kpi.1;uc057kpj.1;uc007pds.4	68020;68020;68020;70369;70369;70369;70369	0;0;0;0;0;0;0	Unchanged	FGF_down	Unchanged
App	10370.6357992057	0.135901064672522	0.124910050529164	1.08799143140841	0.276598890259183	0.419159368121941	15365	chr16	85171949	85174095	2147	*	7.67	7.54	7.78	0.24	0.344	0.707	228.36	144.58	206.35	234	Promoter (<=1kb)	16	84954436	85173707	219272	2	11820	uc007ztm.2	0	ENSMUSG00000022892	amyloid beta (A4) precursor protein	uc007ztm.2;uc007ztn.2;uc007zto.2;uc007ztp.2;uc007ztq.2;uc012ahn.1	11820;11820;11820;11820;11820;11820	0;0;0;0;0;0	Unchanged	Unchanged	Unchanged
Appbp2os	2.45237449862103	-1.90840982881862	1.51970212987386	-1.25577887357243	0.20919615329339	0.339485733083856	6152	chr11	85233164	85236081	2918	*	8.53	8.55	8.52	-0.03	0.905	0.977	450.28	298.35	365.16	369	Promoter (<=1kb)	11	85235166	85238304	3139	1	654810	uc007krk.2	0	ENSMUSG00000085628	amyloid beta precursor protein (cytoplasmic tail) binding protein 2, opposite strand	uc007krk.2;uc007krj.2	654810;66884	0;0	Unchanged	Unchanged	Unchanged
Appl1	921.497656398294	0.298902881483454	0.117566720079899	2.54241065226894	0.0110090743976076	0.0319137659956842	11255	chr14	26969322	26971152	1831	*	8.52	8.47	8.57	0.1	0.625	0.886	383.06	327.6	345.19	416	Promoter (<=1kb)	14	26918988	26970551	51564	2	72993	uc007sth.1	0	ENSMUSG00000040760	adaptor protein, phosphotyrosine interaction, PH domain and leucine zipper containing 1	uc007sth.1;uc057krt.1;uc007sti.1	72993;72993;72993	0;0;0	Unchanged	FGF_up	Unchanged
Appl2	133.705443349238	-1.88017835562947	0.299539052944304	-6.27690558926574	3.45377654504799e-10	5.67026610802384e-09	3690	chr10	83648140	83648593	454	*	4.51	4.37	4.64	0.27	0.628	0.887	22.1	19.22	24.72	25	Promoter (<=1kb)	10	83600033	83648664	48632	2	216190	uc007gkk.2	71	ENSMUSG00000020263	adaptor protein, phosphotyrosine interaction, PH domain and leucine zipper containing 2	uc007gkk.2	216190	0	Unchanged	FGF_down	Unchanged
Aprt	1102.44618120169	0.144736516671479	0.120610595524789	1.20003152328132	0.230127097911696	0.364736649547884	37321	chr8	122575805	122576948	1144	*	7.66	7.59	7.72	0.12	0.64	0.892	241.26	145.41	181.63	240	Promoter (<=1kb)	8	122574637	122576907	2271	2	11821	uc009ntf.1	0	ENSMUSG00000006589	adenine phosphoribosyl transferase	uc009ntf.1;uc009ntg.1;uc009nth.1;uc012gmg.1;uc012gmh.1;uc012gmi.1;uc009ntd.1;uc009nte.1	11821;11821;11821;50917;50917;50917;67177;67177	0;0;0;4220;0;0;0;0	Unchanged	Unchanged	Unchanged
Aptx	137.13516820998	0.148482923740195	0.194933645240658	0.761710086305952	0.446233054124541	0.591611476749475	25313	chr4	40702059	40704639	2581	*	8.3	8.42	8.16	-0.27	0.196	0.542	371.09	315.06	299.55	271	Promoter (<=1kb)	4	40682078	40702916	20839	2	66408	uc008sho.1	0	ENSMUSG00000028411	aprataxin	uc008sho.1;uc008shp.2;uc008shq.2;uc008shr.2	66408;66408;66408;66408	0;0;0;0	Unchanged	Unchanged	Unchanged
Aqp11	27.1861429091414	-1.59981868776653	0.465996140150128	-3.43311574909423	0.000596687306459643	0.00261231014168705	34195	chr7	97737950	97738688	739	*	5.61	5.51	5.71	0.2	0.626	0.886	56.17	35.1	47.55	57	Promoter (<=1kb)	7	97726379	97738247	11869	2	66333	uc009ijs.1	0	ENSMUSG00000042797	aquaporin 11	uc009ijs.1;uc009ijt.1	66333;66333	0;0	Unchanged	FGF_down	Unchanged
Aqp5	26.1400866740636	-2.39823315154198	0.489859988824963	-4.89575226850976	9.79303727377515e-07	8.66368478876096e-06	14069	chr15	99591764	99592194	431	*	4.35	4.79	3.71	-1.08	0.0756	0.316	29.47	25.91	16.17	10	Promoter (<=1kb)	15	99591028	99594829	3802	1	11830	uc007xpt.1	736	ENSMUSG00000044217	aquaporin 5	uc007xpt.1;uc007xpu.1	11830;11830	0;0	Unchanged	FGF_down	Unchanged
Aqp7	8.47974745008384	1.99991821662763	0.743279223476644	2.69066880044505	0.00713089496245169	0.0220399422268484	25337	chr4	41047998	41050202	2205	*	6.87	5.38	7.59	2.21	1.99e-14	1.29e-11	43.28	40.11	178.78	207	Promoter (<=1kb)	4	41033074	41048136	15063	2	11832	uc008sig.1	0	ENSMUSG00000028427	aquaporin 7	uc008sif.1;uc008sig.1	11832;11832	-2550;0	FGF_up	FGF_up	FGF_up
Aqr	1068.29036950884	0.172265204074568	0.135495951676139	1.27136790393793	0.203597795412213	0.332568108619211	21631	chr2	114174754	114175335	582	*	5.3	5.33	5.26	-0.08	0.853	0.963	41.44	39.28	31.38	45	Promoter (<=1kb)	2	114101161	114175339	74179	2	11834	uc008lqd.4	4	ENSMUSG00000040383	aquarius	uc008lqd.4;uc008lqe.3;uc008lqg.2;uc008lqh.2;uc008lqi.2	11834;11834;11834;11834;11834	0;0;0;0;0	Unchanged	Unchanged	Unchanged
Ar	483.394731023541	1.31241500836226	0.174832142493221	7.50671466725948	6.06296787506694e-14	1.689151329669e-12	40352	chrX	98148700	98150692	1993	*	6.46	6.34	6.58	0.24	0.436	0.781	95.77	66.02	88.44	103	Promoter (<=1kb)	20	98148757	98323218	174462	1	11835	uc009tuv.2	0	ENSMUSG00000046532	androgen receptor	uc009tuv.2	11835	0	Unchanged	FGF_up	Unchanged
Arap1	218.382016231621	0.0914418859137065	0.186817390910074	0.489472021144556	0.624507558050793	0.743336988514742	34365	chr7	101347641	101348449	809	*	5.13	4.77	5.42	0.66	0.174	0.51	36.83	17.55	43.74	42	Promoter (<=1kb)	7	101348069	101412586	64518	1	69710	uc009iok.1	0	ENSMUSG00000032812	ArfGAP with RhoGAP domain, ankyrin repeat and PH domain 1	uc009ioh.1;uc009ioi.1;uc009ioj.1;uc012fqj.1;uc009iok.1	56018;56018;56018;56018;69710	0;0;0;0;0	Unchanged	Unchanged	Unchanged
Arc	70.0456241141115	4.91597231616044	0.546474370245443	8.99579666280138	2.34525067968223e-19	1.18271882377899e-17	13245	chr15	74679356	74679703	348	*	3	-0.19	3.92	4.11	0.00186	0.0242	0.92	0.84	14.26	16	Distal Intergenic	15	74669081	74672570	3490	2	11838	uc007wfo.2	-6786	ENSMUSG00000022602	activity regulated cytoskeletal-associated protein	NA	NA	NA	FGF_up	FGF_up	FGF_up
Arcn1	1510.31556727548	0.493712847584498	0.119989447518765	4.11463555999196	3.8779160821156e-05	0.000235512464499216	38136	chr9	44766849	44768571	1723	*	7.67	7.54	7.78	0.24	0.308	0.674	211.79	161.29	226.32	213	Promoter (<=1kb)	9	44742143	44767808	25666	2	213827	uc009pei.3	0	ENSMUSG00000032096	archain 1	uc009pei.3;uc009pej.1;uc009pek.1	213827;213827;76568	0;0;0	Unchanged	FGF_up	Unchanged
Arel1	813.994701461521	-0.0140445716427699	0.170062947633333	-0.0825845478878264	0.934181888298911	0.961203678456317	8651	chr12	84969894	84971704	1811	*	6.88	6.82	6.94	0.12	0.658	0.902	129.84	96.11	125.52	120	Promoter (<=1kb)	12	84918148	84970886	52739	2	68497	uc007oga.3	0	ENSMUSG00000042350	apoptosis resistant E3 ubiquitin protein ligase 1	uc007oga.3;uc011ypf.2;uc007ogb.2;uc007ogc.2	68497;68497;68497;73736	0;0;0;0	Unchanged	Unchanged	Unchanged
Arf1	2754.82618973966	0.524309847037682	0.1097075268416	4.77916021017136	1.76028889592719e-06	1.45598428263819e-05	5332	chr11	59226507	59228274	1768	*	8.37	8.22	8.5	0.28	0.191	0.535	337.94	259.07	338.53	385	Promoter (<=1kb)	11	59211412	59228162	16751	2	11840	uc007jdm.2	0	ENSMUSG00000048076	ADP-ribosylation factor 1	uc007jdm.2;uc007jdn.2;uc007jdo.2	11840;11840;11840	0;0;0	Unchanged	FGF_up	Unchanged
Arf2	255.438507148711	0.554221779458794	0.181916980403997	3.0465643076748	0.00231472959089587	0.00844237048226655	6899	chr11	103966717	103968159	1443	*	7.41	7.44	7.37	-0.07	0.786	0.945	194.29	152.93	166.41	165	Promoter (<=1kb)	11	103966725	103985350	18626	1	11841	uc007lvx.2	0	ENSMUSG00000062421	ADP-ribosylation factor 2	uc007lvx.2;uc007lvy.2	11841;11841	0;0	Unchanged	FGF_up	Unchanged
Arf3	17.8265427474355	0.300626093996986	0.479271746865699	0.627256031600017	0.530491419727915	0.664128359546249	13993	chr15	98761981	98763888	1908	*	8.16	8.09	8.23	0.14	0.492	0.818	297.43	245.7	280.53	320	Promoter (<=1kb)	15	98737626	98763118	25493	2	11842	uc007xnp.1	0	ENSMUSG00000051853	ADP-ribosylation factor 3	uc007xnp.1	11842	0	Unchanged	Unchanged	Unchanged
Arf4	5415.17961289759	0.987543921281082	0.161432061173806	6.11739647069141	9.51165147193517e-10	1.47449102973501e-08	11252	chr14	26636125	26640090	3966	*	10.17	10.15	10.19	0.04	0.818	0.952	1256	1018.73	1141.13	1197	Promoter (<=1kb)	14	26638197	26657258	19062	1	11843	uc007sta.1	0	ENSMUSG00000021877	ADP-ribosylation factor 4	uc007sta.1;uc007ssw.3;uc033goq.1;uc007ssy.3	11843;211922;211922;211922	0;0;0;0	Unchanged	FGF_up	Unchanged
Arf5	762.582926755634	0.396007898683784	0.148973560419003	2.65824282892865	0.00785492739459979	0.0238946531484492	30589	chr6	28423051	28424263	1213	*	7.39	7.12	7.61	0.49	0.0472	0.235	141.81	137.06	169.27	222	Promoter (<=1kb)	6	28423640	28426499	2860	1	11844	uc009bcq.1	0	ENSMUSG00000020440	ADP-ribosylation factor 5	uc009bcq.1;uc009bcr.1;uc009bco.2	11844;56223;74375	0;-3638;0	Unchanged	FGF_up	Unchanged
Arf6	1740.37945761862	1.29470458741198	0.163893008146537	7.8996938432809	2.79589312031396e-15	9.36036822800909e-14	8155	chr12	69370928	69374405	3478	*	8.82	8.77	8.87	0.1	0.637	0.891	505.53	368.55	461.21	473	Promoter (<=1kb)	12	69372150	69375980	3831	1	11845	uc007nsj.1	0	ENSMUSG00000044147	ADP-ribosylation factor 6	uc007nsj.1	11845	0	Unchanged	FGF_up	Unchanged
Arfgap1	796.549189204768	0.87283323674771	0.128537767961705	6.79048073254042	1.11760503631655e-11	2.31100612353899e-10	23171	chr2	180966483	180968227	1745	*	7.69	7.59	7.78	0.18	0.432	0.778	217.31	168.81	199.7	239	Promoter (<=1kb)	2	180967225	180982524	15300	1	228998	uc008okj.2	0	ENSMUSG00000027575	ADP-ribosylation factor GTPase activating protein 1	uc008okj.2;uc008okk.2;uc008okl.2;uc008okm.2;uc008okn.2;uc008oko.2	228998;228998;228998;228998;228998;228998	0;0;0;0;0;0	Unchanged	FGF_up	Unchanged
Arfgap2	1059.3863384777	0.337878250200543	0.122006578748863	2.76934451949537	0.00561692059485859	0.018027238171254	21371	chr2	91265276	91266341	1066	*	7.41	7.37	7.44	0.06	0.789	0.945	186.93	144.58	162.61	184	Promoter (<=1kb)	2	91265115	91277371	12257	1	77038	uc008kvq.2	161	ENSMUSG00000027255	ADP-ribosylation factor GTPase activating protein 2	uc008kvq.2;uc008kvr.2;uc008kvm.2;uc008kvn.3;uc008kvo.3;uc008kvp.3	77038;77038;80708;80708;80708;80708	0;0;0;0;0;0	Unchanged	FGF_up	Unchanged
Arfgef1	1161.79508313569	0.278369539168887	0.113852311827496	2.44500559277759	0.0144849895724989	0.040056915717732	35	chr1	10231723	10233569	1847	*	7.63	7.55	7.7	0.15	0.543	0.847	218.23	157.11	183.53	233	Promoter (<=1kb)	1	10137507	10232670	95164	2	211673	uc007ahn.1	0	ENSMUSG00000067851	ADP-ribosylation factor guanine nucleotide-exchange factor 1(brefeldin A-inhibited)	uc007ahn.1	211673	0	Unchanged	FGF_up	Unchanged
Arfgef2	892.231118651735	-0.446360535868039	0.135716413301788	-3.28892080927222	0.00100572316470429	0.00412222334175092	22907	chr2	166805555	166807834	2280	*	7.78	7.86	7.69	-0.16	0.475	0.807	255.99	207.26	206.35	208	Promoter (<=1kb)	2	166805581	166898052	92472	1	99371	uc008nyr.3	0	ENSMUSG00000074582	ADP-ribosylation factor guanine nucleotide-exchange factor 2 (brefeldin A-inhibited)	uc008nyr.3	99371	0	Unchanged	FGF_down	Unchanged
Arfip1	459.914901403887	0.250479348959082	0.162560874610383	1.54083416172199	0.12335715283947	0.226407354228707	23851	chr3	84581699	84583407	1709	*	7.09	7.03	7.15	0.12	0.655	0.901	150.09	111.98	132.18	152	Promoter (<=1kb)	3	84496093	84582625	86533	2	99889	uc008pqe.2	0	ENSMUSG00000074513	ADP-ribosylation factor interacting protein 1	uc008pqe.2;uc008pqf.2;uc008pqg.3	99889;99889;99889	0;0;0	Unchanged	Unchanged	Unchanged
Arfip2	890.414305762975	0.265400617275351	0.125527619797596	2.1142806475841	0.0344913042531346	0.0816802196222438	34442	chr7	105639400	105640365	966	*	6.93	6.84	7.01	0.17	0.551	0.852	134.44	95.27	111.26	147	Promoter (<=1kb)	7	105634201	105640416	6216	2	76932	uc009iyr.2	51	ENSMUSG00000030881	ADP-ribosylation factor interacting protein 2	uc009iys.1;uc009iyt.2;uc009iyw.2;uc009iyu.1;uc009iyv.1;uc009iyx.1;uc009iyq.2;uc009iyr.2;uc012frp.1	14356;14356;14356;14356;14356;14356;76932;76932;76932	0;0;0;0;0;0;0;0;0	Unchanged	Unchanged	Unchanged
Arglu1	702.170934628817	0.245492444599292	0.156732453452648	1.5663153303056	0.117274813783689	0.217905123720293	35439	chr8	8689117	8690819	1703	*	7.64	7.63	7.65	0.02	0.943	0.986	240.33	157.11	195.89	206	Promoter (<=1kb)	8	8666576	8690537	23962	2	234023	uc009kug.1	0	ENSMUSG00000040459	arginine and glutamate rich 1	uc009kug.1;uc009kuh.1	234023;234023	0;0	Unchanged	Unchanged	Unchanged
Arhgap1	510.172126595655	-0.0943593543290986	0.140091823387945	-0.67355361681457	0.50059515030105	0.6396315198202	21382	chr2	91650227	91651069	843	*	6.11	6.28	5.92	-0.36	0.296	0.663	89.32	66.02	57.06	64	Promoter (<=1kb)	2	91650118	91672325	22208	1	228359	uc008kwi.3	109	ENSMUSG00000027247	Rho GTPase activating protein 1	uc008kwi.3;uc008kwj.3;uc008kwk.3;uc008kwl.3;uc012bzl.2;uc008kwm.3;uc057ldo.1;uc008kwh.1;uc012bzj.1;uc012bzk.1	228359;228359;228359;228359;228359;228359;381410;381410;381410;381410	0;0;0;0;0;-2139;0;0;0;0	Unchanged	Unchanged	Unchanged
Arhgap10	342.196974509475	0.317290578731424	0.188387925517782	1.68424052581583	0.0921351941550586	0.179611782831718	36351	chr8	77510075	77510426	352	*	3.03	1.12	3.83	2.71	0.0104	0.0843	1.84	2.51	11.41	17	Intron (uc009mhm.1/78514, intron 1 of 22)	8	77250366	77517907	267542	2	78514	uc009mhm.1	7481	ENSMUSG00000037148	Rho GTPase activating protein 10	uc009mhm.1;uc009mhn.1;uc012gge.1	78514;78514;78514	0;0;0	Unchanged	Unchanged	Unchanged
Arhgap11a	273.246034978259	-1.0301952465082	0.168627413749559	-6.10929874094027	1.00069859382851e-09	1.5452648053538e-08	21629	chr2	113847368	113849483	2116	*	7.59	7.77	7.38	-0.39	0.112	0.4	247.7	188.87	183.53	150	Promoter (<=1kb)	2	113831492	113848661	17170	2	228482	uc008lpr.2	0	ENSMUSG00000041219	Rho GTPase activating protein 11A	uc008lpr.2;uc012cbc.2;uc008lps.1	228482;228482;228482	0;0;0	Unchanged	FGF_down	Unchanged
Arhgap12	223.640944181618	-1.03447071631577	0.194702209539125	-5.3130918173165	1.07780696443574e-07	1.16263076163682e-06	17447	chr18	6134713	6137325	2613	*	8.02	8.04	7.99	-0.05	0.83	0.956	315.84	211.43	243.44	265	Promoter (<=1kb)	18	6024448	6136098	111651	2	75415	uc008dzc.2	0	ENSMUSG00000041225	Rho GTPase activating protein 12	uc008dzc.2;uc008dzd.2;uc008dze.1	75415;75415;75415	0;0;0	Unchanged	FGF_down	Unchanged
Arhgap15os	2.93429726194988	-0.673744490959117	1.3305448278971	-0.506367374351422	0.612598773616693	0.732764265639182	20849	chr2	44064259	44066352	2094	*	6.95	7.13	6.75	-0.38	0.206	0.556	123.39	156.28	135.03	80	Promoter (<=1kb)	2	44059238	44065324	6087	2	320872	uc029txa.1	0	ENSMUSG00000085089	Rho GTPase activating protein 15, opposite strand	uc029txa.1;uc008jov.1;uc008jow.1;uc008jox.1;uc056zmn.1	320872;76117;76117;76117;76117	0;0;0;0;0	Unchanged	Unchanged	Unchanged
Arhgap17	621.096176317096	0.827019191355696	0.128303863158927	6.44578558270915	1.15003153859799e-10	2.03030678719692e-09	34862	chr7	123366577	123370932	4356	*	8.66	8.62	8.69	0.07	0.717	0.924	400.56	387.77	399.39	427	Promoter (<=1kb)	7	123279149	123369915	90767	2	70497	uc009jpi.2	0	ENSMUSG00000030766	Rho GTPase activating protein 17	uc009jpi.2;uc009jpj.2;uc009jpk.2;uc009jpl.2;uc009jpm.2;uc009jpn.2;uc009jpo.2	70497;70497;70497;70497;70497;70497;70497	0;0;0;0;0;0;0	Unchanged	FGF_up	Unchanged
Arhgap18	352.995308453581	-1.13424372057329	0.219017311399367	-5.1787857011223	2.23334840603391e-07	2.27950300161548e-06	2675	chr10	26772075	26774756	2682	*	8.1	8.04	8.17	0.12	0.553	0.853	287.3	239.85	288.13	286	Promoter (<=1kb)	10	26772512	26918648	146137	1	73910	uc007ese.1	0	ENSMUSG00000039031	Rho GTPase activating protein 18	uc007ese.1	73910	0	Unchanged	FGF_down	Unchanged
Arhgap19	117.619891217457	-1.36637965069554	0.244764455669556	-5.58242677417271	2.37185483492629e-08	2.87801106467401e-07	19532	chr19	41800625	41802040	1416	*	7.57	7.27	7.82	0.54	0.0281	0.167	185.09	124.52	221.57	230	Promoter (<=1kb)	19	41766588	41802084	35497	2	71085	uc008hmh.2	44	ENSMUSG00000025154	Rho GTPase activating protein 19	uc008hmh.2;uc012bls.1;uc012blt.1	71085;71085;71085	0;0;0	Unchanged	FGF_down	Unchanged
Arhgap23	298.399880787293	0.86359867370587	0.166226978827773	5.19529789806648	2.04392276022475e-07	2.10051288307878e-06	6552	chr11	97449298	97451277	1980	*	7.96	8.03	7.88	-0.15	0.49	0.816	294.66	228.98	240.59	230	Promoter (<=1kb)	11	97450160	97502400	52241	1	58996	uc007lec.1	0	ENSMUSG00000049807	Rho GTPase activating protein 23	uc007lec.1	58996	0	Unchanged	FGF_up	Unchanged
Arhgap26	68.3275374201741	-0.104176129220126	0.282976093807381	-0.36814462952845	0.712765394526107	0.812491368180833	17903	chr18	38993175	38993723	549	*	4.73	4.44	4.97	0.52	0.324	0.689	27.62	15.88	29.48	33	Promoter (<=1kb)	18	38993145	39100149	107005	1	71302	uc008esq.1	30	ENSMUSG00000036452	Rho GTPase activating protein 26	uc008esq.1;uc008esr.1;uc008est.2	71302;71302;71302	0;0;0	Unchanged	Unchanged	Unchanged
Arhgap27	38.980305210683	0.796850330528435	0.36745366328638	2.16857364654274	0.030115067737976	0.0731278524185878	6880	chr11	103339640	103340737	1098	*	6.72	6.62	6.81	0.18	0.536	0.843	109.58	87.75	91.29	133	Promoter (<=1kb)	11	103331484	103339721	8238	2	544817	uc007luc.2	0	ENSMUSG00000034255	Rho GTPase activating protein 27	uc007luc.2;uc007lud.2;uc029roj.1;uc029rok.1	544817;544817;544817;653030	0;0;0;-4016	Unchanged	Unchanged	Unchanged
Arhgap33	82.595658509126	-0.21386860017835	0.249793744651708	-0.856180768163554	0.391897798600135	0.538384922308954	33268	chr7	30534434	30535127	694	*	5.42	5.7	5.07	-0.63	0.166	0.498	68.14	35.94	31.38	36	Promoter (<=1kb)	7	30522226	30535060	12835	2	233071	uc009geq.2	0	ENSMUSG00000036882	Rho GTPase activating protein 33	uc009ggd.3;uc009geq.2;uc009ger.2;uc009ges.2;uc009get.1	14447;233071;233071;233071;333193	0;0;0;0;0	Unchanged	Unchanged	Unchanged
Arhgap35	1589.46426593816	-0.625475436453386	0.124563315432293	-5.02134544414374	5.13107825884845e-07	4.81748997248678e-06	32823	chr7	16609272	16609697	426	*	3.37	3.55	3.17	-0.38	0.687	0.913	9.21	14.21	0.95	17	Intron (uc009fhw.1/232906, intron 1 of 6)	7	16494473	16614993	120521	2	232906	uc009fhw.1	5296	ENSMUSG00000058230	Rho GTPase activating protein 35	uc057lsz.1;uc057lta.1;uc009fhw.1	102634559;102634559;232906	0;0;0	Unchanged	FGF_down	Unchanged
Arhgap39	532.748651862483	0.466421295741479	0.170951855162555	2.72837808807613	0.00636466113990609	0.0199980022499382	13354	chr15	76816479	76818791	2313	*	7.45	7.1	7.73	0.63	0.014	0.104	165.75	108.64	210.16	214	Promoter (<=1kb)	15	76723985	76818170	94186	2	223666	uc007wmh.2	0	ENSMUSG00000033697	Rho GTPase activating protein 39	uc007wmh.2;uc007wmi.2;uc007wmj.2	223666;223666;223666	0;0;0	Unchanged	FGF_up	Unchanged
Arhgap4	26.2836723938953	-1.30818545467653	0.472292289041696	-2.76986409693646	0.00560796865208602	0.0180130183632712	40209	chrX	73914346	73914973	628	*	5.38	5.43	5.34	-0.09	0.831	0.957	46.04	40.11	39.94	41	Downstream (1-2kb)	20	73906401	73911298	4898	2	171207	uc009tnf.2	-3048	ENSMUSG00000031389	Rho GTPase activating protein 4	uc009tna.2;uc009tnb.2;uc009tnc.2;uc009tnd.2;uc009tne.2;uc012hkj.1;uc012hkk.1;uc012hkl.1;uc009tnf.2;uc009tng.2;uc009tnh.2;uc057cfg.1;uc009tni.2	171207;171207;171207;171207;171207;171207;171207;171207;171207;56292;56292;56292;56292	-3048;-3048;-3048;-3048;-3048;-3048;-3048;-3048;-3048;0;0;0;0	Unchanged	FGF_down	Unchanged
Arhgap40	29.3541617459352	1.54278560907936	0.4491449343981	3.43493935013838	0.000592686459982731	0.00259757489126581	22730	chr2	158510279	158511703	1425	*	6.33	5.71	6.76	1.05	0.000952	0.0145	58.93	45.96	106.51	111	Promoter (1-2kb)	2	158512796	158550628	37833	1	545481	uc012cih.1	-1093	ENSMUSG00000074625	Rho GTPase activating protein 40	uc008nqi.1;uc012cih.1	246747;545481	7667;-1093	FGF_up	FGF_up	FGF_up
Arhgap42	642.291140044352	-0.77598409804128	0.228267885219087	-3.39944489912151	0.000675227834935591	0.00291242262112962	37648	chr9	9235254	9235702	449	*	3.83	3.57	4.05	0.48	0.486	0.814	12.89	10.86	15.22	18	Intron (uc012gnz.1/71544, intron 1 of 22)	9	8994953	9239013	244061	2	71544	uc012gnz.1	3311	ENSMUSG00000050730	Rho GTPase activating protein 42	uc009odq.2;uc012gnz.1;uc009odp.2	100579151;71544;71544	0;0;0	Unchanged	FGF_down	Unchanged
Arhgap44	78.6601144051884	-0.430827579369404	0.249064147927677	-1.72978561127356	0.0836685861458318	0.166418196308035	5527	chr11	65162558	65162914	357	*	3.27	2.21	3.88	1.66	0.0864	0.342	0.92	8.36	12.36	17	Promoter (<=1kb)	11	65051477	65162567	111091	2	216831	uc007jkw.1	0	ENSMUSG00000033389	Rho GTPase activating protein 44	uc007jku.1;uc007jkv.1;uc007jkw.1	216831;216831;216831	0;0;0	Unchanged	Unchanged	Unchanged
Arhgap5	640.158636661571	0.505549919230379	0.155749931748583	3.24590780589526	0.00117076747643009	0.00470986633399273	8045	chr12	52503818	52505282	1465	*	8.02	8.06	7.98	-0.07	0.732	0.929	287.3	244.86	238.69	267	Promoter (<=1kb)	12	52503972	52545639	41668	1	11855	uc007nnj.1	0	ENSMUSG00000035133	Rho GTPase activating protein 5	uc007nnj.1	11855	0	Unchanged	FGF_up	Unchanged
Arhgap6	569.745120822252	-0.171801179334908	0.178722893282807	-0.961271251708387	0.336415798760533	0.48263613333164	40739	chrX	169036086	169039349	3264	*	7.92	8.01	7.81	-0.2	0.402	0.755	308.48	208.09	227.27	222	Promoter (<=1kb)	20	169036611	169251527	214917	1	11856	uc009uxl.2	0	ENSMUSG00000031355	Rho GTPase activating protein 6	uc009uxj.2;uc009uxk.2;uc009uxl.2;uc009uxm.2;uc009uxn.2;uc009uxo.2;uc009uxp.2	11856;11856;11856;11856;11856;11856;11856	0;0;0;0;0;0;0	Unchanged	Unchanged	Unchanged
Arhgdia	4639.74002015419	0.118070877855854	0.167403205662492	0.705308344536136	0.480618368625907	0.621529873058702	7477	chr11	120580012	120582916	2905	*	9.15	9.09	9.22	0.13	0.503	0.824	610.5	477.19	553.45	637	Promoter (<=1kb)	11	120577235	120581247	4013	2	192662	uc007mtj.1	0	ENSMUSG00000025132	Rho GDP dissociation inhibitor (GDI) alpha	uc007mtj.1;uc007mtk.2	192662;192662	0;0	Unchanged	Unchanged	Unchanged
Arhgdib	123.419260759663	0.191399207821322	0.22499720879217	0.850673698792938	0.394950637332421	0.541398098107247	32360	chr6	136939464	136940022	559	*	4.27	4.36	4.16	-0.2	0.748	0.932	20.26	20.89	22.82	13	Promoter (<=1kb)	6	136923660	136939527	15868	2	11857	uc057aex.2	0	ENSMUSG00000030220	Rho, GDP dissociation inhibitor (GDI) beta	uc057aex.2;uc009emo.3;uc009emp.3;uc057aey.2;uc057aez.2;uc057afa.2	11857;11857;11857;11857;11857;11857	0;0;0;0;0;0	Unchanged	Unchanged	Unchanged
Arhgdig	367.387323502116	-0.0630953407182313	0.156208313659861	-0.403917942905521	0.686273061425031	0.793147193414693	16041	chr17	26200460	26201632	1173	*	6.54	6.49	6.59	0.1	0.742	0.931	100.37	79.39	95.09	97	Promoter (<=1kb)	17	26199183	26201350	2168	2	14570	uc008bdp.1	0	ENSMUSG00000073433	Rho GDP dissociation inhibitor (GDI) gamma	uc008bdm.2;uc008bdn.2;uc008bdp.1;uc008bdq.1;uc008bdr.1;uc008bds.1;uc008bdo.1;uc012ans.1	12005;12005;14570;50782;50782;50782;69191;69191	0;0;0;0;0;0;-1373;-1373	Unchanged	Unchanged	Unchanged
Arhgef1	371.878335681128	-0.671731808672583	0.166598900833538	-4.03203025537223	5.52970660378524e-05	0.000322710221330279	32992	chr7	24904367	24904987	621	*	6.04	5.94	6.14	0.21	0.541	0.846	68.14	54.32	69.42	72	Promoter (1-2kb)	7	24902986	24909960	6975	1	16801	uc029wdx.1	1381	ENSMUSG00000040940	Rho guanine nucleotide exchange factor (GEF) 1	uc009fqt.1;uc029wdx.1;uc009fqv.3;uc009fqw.3;uc009fqx.3;uc009fqy.3;uc009fqz.3;uc009fra.1	12518;16801;16801;16801;16801;16801;16801;16801	6856;0;0;0;0;0;0;-3324	Unchanged	FGF_down	Unchanged
Arhgef10	148.951656019982	-0.450271085149023	0.225660541052401	-1.99534700683211	0.0460050463823344	0.102814568878396	35545	chr8	14911702	14912074	373	*	4.53	4.74	4.28	-0.46	0.409	0.76	26.7	26.74	21.87	17	Promoter (<=1kb)	8	14911663	14961285	49623	1	234094	uc009kzf.2	39	ENSMUSG00000071176	Rho guanine nucleotide exchange factor (GEF) 10	uc009kzf.2;uc009kzg.2;uc009kzh.2	234094;234094;234094	0;0;0	Unchanged	Unchanged	Unchanged
Arhgef10l	1284.72022949488	-0.580735195376426	0.150809342795556	-3.85079057179963	0.000117737148754646	0.00063273129582533	27137	chr4	140661247	140668690	7444	*	10.14	9.94	10.31	0.37	0.0452	0.228	1112.35	854.09	1206.74	1326	Promoter (<=1kb)	4	140514485	140665905	151421	2	72754	uc008vmy.2	0	ENSMUSG00000040964	Rho guanine nucleotide exchange factor (GEF) 10-like	uc008vmy.2;uc056zye.1	72754;72754	0;0	Unchanged	FGF_down	Unchanged
Arhgef11	247.641559298915	-0.227481699697999	0.171870278672592	-1.32356624690966	0.185647141215841	0.309982485584204	23899	chr3	87617593	87618385	793	*	5.82	5.89	5.75	-0.14	0.73	0.928	72.74	45.96	58.01	50	Promoter (<=1kb)	3	87618751	87699145	80395	1	213498	uc008psk.1	-366	ENSMUSG00000041977	Rho guanine nucleotide exchange factor (GEF) 11	uc008psk.1;uc012crh.1;uc008psl.1;uc008psm.1	213498;213498;213498;213498	-366;-366;-366;-366	Unchanged	Unchanged	Unchanged
Arhgef15	6.0307456239901	-1.28691315946818	0.837309234060778	-1.53696281746102	0.124302414993876	0.227478558261646	5552	chr11	68947082	68947365	284	*	3.39	3.66	3.05	-0.62	0.449	0.79	11.97	13.37	9.51	7	Exon (uc007jol.1/442801, exon 12 of 16)	11	68943154	68956858	13705	2	442801	uc007jol.1	9493	ENSMUSG00000052921	Rho guanine nucleotide exchange factor (GEF) 15	uc007jol.1;uc007jom.1;uc007jon.1	442801;442801;442801	0;0;4809	Unchanged	Unchanged	Unchanged
Arhgef17	4678.07672850933	-1.32056418860499	0.1506338509828	-8.76671598043241	1.83953051194812e-18	8.55489053649956e-17	34337	chr7	100921511	100932675	11165	*	9.92	9.95	9.89	-0.07	0.729	0.928	1151.03	832.36	877.72	1014	Promoter (<=1kb)	7	100869746	100932161	62416	2	207212	uc009inv.1	0	ENSMUSG00000032875	Rho guanine nucleotide exchange factor (GEF) 17	uc009inv.1;uc009inw.2	207212;233571	0;31691	Unchanged	FGF_down	Unchanged
Arhgef18	337.04323265901	-0.675125177941638	0.168330436950002	-4.01071363072721	6.05354982834842e-05	0.000349526703132466	35404	chr8	3393026	3393833	808	*	5.2	5.32	5.06	-0.26	0.56	0.857	43.28	36.77	26.63	40	Promoter (<=1kb)	8	3393008	3450640	57633	1	102098	uc009kri.1	18	ENSMUSG00000004568	rho/rac guanine nucleotide exchange factor (GEF) 18	uc009kri.1;uc009krj.1;uc009krg.2;uc009krh.2;uc012fyi.1	102098;102098;319493;319493;319493	0;0;39611;39611;39611	Unchanged	FGF_down	Unchanged
Arhgef19	340.027547520882	-1.66927232197888	0.173232336380996	-9.6360319144319	5.63232155571396e-22	3.56177286951816e-20	27168	chr4	141242325	141243216	892	*	4.86	4.9	4.82	-0.08	0.872	0.968	32.23	27.58	28.53	28	Promoter (<=1kb)	4	141242884	141257562	14679	1	213649	uc008vob.1	0	ENSMUSG00000028919	Rho guanine nucleotide exchange factor (GEF) 19	uc008vob.1	213649	0	Unchanged	FGF_down	Unchanged
Arhgef2	1024.34324564502	0.281803796507279	0.127135839202655	2.21655670245808	0.0266533990777149	0.0661602130377672	23958	chr3	88619600	88623261	3662	*	8.26	8.23	8.28	0.04	0.832	0.957	344.39	257.4	293.84	327	Promoter (<=1kb)	3	88621106	88639536	18431	1	16800	uc008pvw.2	0	ENSMUSG00000028059	rho/rac guanine nucleotide exchange factor (GEF) 2	uc008pvu.2;uc008pvv.2;uc008pvw.2;uc008pvx.2;uc008pvy.2;uc008pvz.2	16800;16800;16800;16800;16800;16800	0;0;0;0;0;0	Unchanged	Unchanged	Unchanged
Arhgef3	352.564156938251	2.22185909719406	0.213002799601735	10.4311262638257	1.7875676864531e-25	1.57095654327114e-23	11257	chr14	27114445	27115403	959	*	5.55	5.42	5.66	0.24	0.564	0.859	57.09	28.41	52.3	49	Promoter (<=1kb)	14	27114899	27403911	289013	1	71704	uc007sto.2	0	ENSMUSG00000021895	Rho guanine nucleotide exchange factor (GEF) 3	uc007sto.2	71704	0	Unchanged	FGF_up	Unchanged
Arhgef37	207.377194065779	2.51941885728703	0.212377841011846	11.862908320772	1.84454801379638e-32	2.6885412025481e-30	18159	chr18	61535914	61536304	391	*	3.44	1.85	4.17	2.33	0.0091	0.0764	5.52	1.67	17.12	19	Promoter (<=1kb)	18	61493794	61536536	42743	2	328967	uc008fca.2	232	ENSMUSG00000045094	Rho guanine nucleotide exchange factor (GEF) 37	uc008fca.2	328967	0	Unchanged	FGF_up	Unchanged
Arhgef39	157.398680639774	0.0241208606284228	0.207111727251645	0.11646303639347	0.907285579388899	0.943684382982867	25395	chr4	43499031	43500048	1018	*	5.67	6.13	5.01	-1.12	0.00605	0.0573	84.72	55.16	32.33	32	Promoter (<=1kb)	4	43496142	43499660	3519	2	230098	uc008spz.3	0	ENSMUSG00000051517	Rho guanine nucleotide exchange factor (GEF) 39	uc008spz.3;uc008spy.2	230098;622404	0;0	Unchanged	Unchanged	Unchanged
Arhgef4	65.0296685629463	-0.000123836534106835	0.26638762018749	-0.000464873457781842	0.999629084658668	0.999796386597523	135	chr1	34801387	34802504	1118	*	6.07	5.98	6.15	0.17	0.609	0.879	66.3	60.17	70.37	72	Promoter (<=1kb)	1	34801722	34808911	7190	1	226970	uc007apg.1	0	ENSMUSG00000037509	Rho guanine nucleotide exchange factor (GEF) 4	uc007apf.1;uc007apg.1;uc007aph.1;uc007api.1	226970;226970;226970;226970	0;0;0;0	Unchanged	Unchanged	Unchanged
Arhgef40	1042.01512354759	1.17409907757927	0.165350990329142	7.10064738797236	1.24173827564409e-12	2.91576736159099e-11	11628	chr14	51983545	51987105	3561	*	8.4	7.84	8.8	0.96	1.52e-05	0.000549	269.8	187.2	416.51	475	Promoter (<=1kb)	14	51984833	51988584	3752	1	268739	uc007tno.2	0	ENSMUSG00000004562	Rho guanine nucleotide exchange factor (GEF) 40	uc029sjc.1;uc007tno.2;uc007tnp.2;uc007tnq.2;uc007tnr.2;uc007tns.2;uc007tnt.2;uc007tnu.1	100502764;268739;268739;268739;268739;268739;268739;268739	0;0;0;0;0;0;0;-1480	Unchanged	FGF_up	FGF_up
Arhgef5	819.070371189447	-0.875769505063152	0.181183838396392	-4.83359615744067	1.34088464680646e-06	1.15048480248606e-05	30976	chr6	43264591	43266939	2349	*	8.48	8.65	8.28	-0.37	0.472	0.804	511.06	290.83	242.49	380	Promoter (<=1kb)	6	43265644	43289320	23677	1	54324	uc009bso.2	0	ENSMUSG00000033542	Rho guanine nucleotide exchange factor (GEF) 5	uc009bso.2	54324	0	Unchanged	FGF_down	Unchanged
Arhgef7	649.768631718047	0.384755487302956	0.139065108019648	2.76672914422642	0.0056621776904864	0.0181432567712315	35491	chr8	11757671	11759122	1452	*	7.11	7.04	7.17	0.14	0.602	0.876	151.01	111.98	138.84	150	Promoter (<=1kb)	8	11758330	11835219	76890	1	54126	uc009kvw.3	0	ENSMUSG00000031511	Rho guanine nucleotide exchange factor (GEF7)	uc009kvu.2;uc009kvv.2;uc009kvw.3;uc009kvx.3	54126;54126;54126;54126	0;0;0;0	Unchanged	FGF_up	Unchanged
Arid1a	1563.00627693552	-0.183610245217428	0.127371327564014	-1.44153514553853	0.149433555676015	0.26334854872305	26785	chr4	133751783	133757978	6196	*	10.04	10.18	9.88	-0.3	0.142	0.458	1383.99	937.66	852.99	1027	Promoter (<=1kb)	4	133679008	133753611	74604	2	93760	uc008vdh.1	0	ENSMUSG00000007880	AT rich interactive domain 1A (SWI-like)	uc008vdh.1;uc008vdi.1;uc008vdj.1	93760;93760;93760	0;0;0	Unchanged	Unchanged	Unchanged
Arid1b	393.299313018125	-0.69522968559058	0.166091953611896	-4.18581195820666	2.84148516970556e-05	0.000177344285892015	15623	chr17	4993525	4997459	3935	*	9.25	9.21	9.28	0.07	0.726	0.927	673.12	512.29	546.79	699	Promoter (<=1kb)	17	4995074	5098186	103113	1	239985	uc008aex.1	0	ENSMUSG00000069729	AT rich interactive domain 1B (SWI-like)	uc008aex.1;uc008aey.1	239985;239985	0;0	Unchanged	FGF_down	Unchanged
Arid2	917.331709036162	-0.28356641662041	0.146846492675777	-1.93103976440553	0.0534781351052915	0.116233982683841	13907	chr15	96283794	96289716	5923	*	10.59	10.6	10.57	-0.03	0.882	0.97	1766.14	1339.64	1455.89	1592	Promoter (<=1kb)	15	96287522	96405463	117942	1	77044	uc007xkd.2	0	ENSMUSG00000033237	AT rich interactive domain 2 (ARID, RFX-like)	uc007xjz.1;uc007xkd.2	70040;77044	0;0	Unchanged	Unchanged	Unchanged
Arid3a	87.343991131102	0.467515806695886	0.253280734034957	1.84584038133497	0.0649153853335107	0.135998016740775	3427	chr10	79926245	79928341	2097	*	7.2	7.11	7.28	0.17	0.525	0.838	169.43	106.97	150.25	161	Promoter (<=1kb)	10	79927043	79955018	27976	1	13496	uc007gap.2	0	ENSMUSG00000019564	AT rich interactive domain 3A (BRIGHT-like)	uc011xih.1;uc007gao.3;uc007gap.2;uc011xii.2;uc007gaq.2	114229;114229;13496;13496;13496	0;0;0;0;0	Unchanged	Unchanged	Unchanged
Arid3b	26.2477911919893	1.45889408048941	0.428428584851849	3.40522115487205	0.000661104910912109	0.00285883113565956	38384	chr9	57836444	57836747	304	*	3.54	3.47	3.6	0.13	0.858	0.965	13.81	8.36	13.31	11	Promoter (<=1kb)	9	57790496	57836484	45989	2	56380	uc009pvt.3	0	ENSMUSG00000004661	AT rich interactive domain 3B (BRIGHT-like)	uc012gua.3;uc009pvt.3;uc009pvu.1;uc009pvv.1	56380;56380;56380;56380	0;0;0;0	Unchanged	FGF_up	Unchanged
Arid4a	226.91816459923	-0.0416723290444062	0.16484390095744	-0.252798731420251	0.800423748049164	0.875506967757263	8241	chr12	71015965	71017471	1507	*	7.55	7.71	7.38	-0.33	0.152	0.475	227.44	191.38	161.66	171	Promoter (<=1kb)	12	71015967	71067338	51372	1	238247	uc011ynm.1	0	ENSMUSG00000048118	AT rich interactive domain 4A (RBP1-like)	uc011ynm.1;uc007nud.1;uc007nue.1;uc007nub.2;uc007nuc.3	238247;238247;238247;73204;73204	0;0;0;0;0	Unchanged	Unchanged	Unchanged
Arid4b	466.207936553637	0.279092142492807	0.146980210971282	1.89884162397439	0.0575853025808542	0.123255647644407	9296	chr13	14063769	14065521	1753	*	8.05	8.08	8.01	-0.08	0.738	0.93	302.03	240.68	221.57	293	Promoter (<=1kb)	13	14063784	14165682	101899	1	94246	uc007pmy.2	0	ENSMUSG00000039219	AT rich interactive domain 4B (RBP1-like)	uc007pmu.1;uc007pmv.1;uc007pmw.2;uc007pmy.2;uc007pmz.2;uc007pna.2	14593;14593;14593;94246;94246;94246	0;0;0;0;0;0	Unchanged	Unchanged	Unchanged
Arid5a	99.5306069036636	1.43457235333645	0.318282465983851	4.5072302330636	6.56793548483664e-06	4.78950365556849e-05	155	chr1	36307765	36308483	719	*	5.79	5.38	6.11	0.72	0.0522	0.25	44.2	39.28	62.76	75	Promoter (<=1kb)	1	36307733	36324029	16297	1	214855	uc007apu.2	32	ENSMUSG00000037447	AT rich interactive domain 5A (MRF1-like)	uc007apu.2;uc007apv.2;uc007apw.2;uc007apx.2;uc007apy.2;uc011wjg.1;uc011wjh.1;uc056ycj.1	214855;214855;214855;214855;214855;214855;214855;214855	0;0;0;0;0;0;0;0	Unchanged	FGF_up	Unchanged
Arid5b	266.862522692223	-1.11941332962605	0.163848289975849	-6.83201106212979	8.37323914449671e-12	1.75882169165245e-10	3198	chr10	68135704	68137539	1836	*	6.27	5.86	6.59	0.73	0.0217	0.141	63.54	52.65	97	96	Promoter (<=1kb)	10	68095593	68136626	41034	2	71371	uc007fmf.1	0	ENSMUSG00000019947	AT rich interactive domain 5B (MRF1-like)	uc007fmf.1;uc007fmg.1;uc007fmh.1;uc011xfr.1;uc007fmi.1	71371;71371;71371;71371;71371	0;0;0;0;0	Unchanged	FGF_down	Unchanged
Arih1	1167.97949712797	0.153417835275523	0.125446819336678	1.22297110510052	0.221340610083084	0.354334713596707	38439	chr9	59484737	59487427	2691	*	8.47	8.48	8.46	-0.02	0.937	0.984	388.59	325.93	363.26	343	Promoter (<=1kb)	9	59388554	59486374	97821	2	23806	uc009pxs.2	0	ENSMUSG00000025234	ariadne RBR E3 ubiquitin protein ligase 1	uc009pxu.1;uc009pxs.2	100504377;23806	-2996;0	Unchanged	Unchanged	Unchanged
Arl1	254.505933372821	0.360578432265083	0.196406210026236	1.83588101525362	0.0663752560589954	0.138329042792871	3761	chr10	88730404	88732137	1734	*	7.17	7.28	7.05	-0.24	0.366	0.725	179.56	132.04	128.38	136	Promoter (<=1kb)	10	88731414	88743202	11789	1	104303	uc007grw.1	0	ENSMUSG00000060904	ADP-ribosylation factor-like 1	uc007grw.1;uc011xlj.1	104303;237433	0;0	Unchanged	Unchanged	Unchanged
Arl10	321.387041859574	-0.262169963117641	0.189111023930772	-1.38632829365682	0.165646681098422	0.284128750357109	10059	chr13	54574662	54576466	1805	*	7.72	7.51	7.9	0.39	0.103	0.38	214.55	150.43	242.49	235	Promoter (<=1kb)	13	54575013	54581128	6116	1	56795	uc007qoj.2	0	ENSMUSG00000025870	ADP-ribosylation factor-like 10	uc007qoj.2	56795	0	Unchanged	Unchanged	Unchanged
Arl13b	44.5927688188781	0.252552310385533	0.324495396303556	0.778292429607468	0.436396637434506	0.582056981432564	15310	chr16	62846606	62846960	355	*	4.13	4	4.25	0.25	0.701	0.918	11.97	20.06	16.17	22	Promoter (<=1kb)	16	62793689	62847040	53352	2	68146	uc007zpu.2	80	ENSMUSG00000022911	ADP-ribosylation factor-like 13B	uc007zpu.2;uc007zpw.2	68146;68146	0;0	Unchanged	Unchanged	Unchanged
Arl14ep	254.192568232525	-0.197407502649537	0.173354384313314	-1.13875113935827	0.254806966338896	0.393759212978648	21565	chr2	106973536	106974904	1369	*	7.03	7.15	6.89	-0.26	0.353	0.715	170.35	114.49	128.38	109	Promoter (<=1kb)	2	106962529	106974397	11869	2	212772	uc008llr.1	0	ENSMUSG00000027122	ADP-ribosylation factor-like 14 effector protein	uc008llq.1;uc008llr.1;uc008lls.1	212772;212772;212772	-3145;0;0	Unchanged	Unchanged	Unchanged
Arl15	87.6508914198467	-0.121475785436064	0.25678707563273	-0.473060356081957	0.636170119303382	0.752971406804716	10860	chr13	113793844	113795688	1845	*	7.05	7.09	7.01	-0.08	0.801	0.947	167.59	104.46	112.21	146	Promoter (<=1kb)	13	113794508	114157461	362954	1	218639	uc007rxj.1	0	ENSMUSG00000042348	ADP-ribosylation factor-like 15	uc007rxj.1;uc007rxk.2;uc011zev.1	218639;218639;218639	0;0;0	Unchanged	Unchanged	Unchanged
Arl16	74.8196500841376	0.0581970232721331	0.255848042975362	0.227467142587202	0.820060516024054	0.888206913232396	7467	chr11	120466462	120467454	993	*	6.28	6.29	6.26	-0.03	0.929	0.983	97.61	59.34	70.37	83	Promoter (<=1kb)	11	120464326	120467481	3156	2	70317	uc007msv.2	27	ENSMUSG00000057594	ADP-ribosylation factor-like 16	uc007msx.2;uc007msy.2;uc007msz.2;uc007msu.2;uc007msv.2;uc007msw.1	15239;15239;15239;67291;70317;70317	0;0;0;0;0;0	Unchanged	Unchanged	Unchanged
Arl2	215.127683406266	-0.559227438668953	0.21133173461128	-2.64620663667757	0.00814000757210525	0.0246551876588449	18854	chr19	6140002	6142060	2059	*	8.78	8.8	8.76	-0.04	0.835	0.958	497.24	392.78	415.56	449	Promoter (<=1kb)	19	6134389	6141137	6749	2	56327	uc008gho.1	0	ENSMUSG00000024944	ADP-ribosylation factor-like 2	uc008gho.1	56327	0	Unchanged	FGF_down	Unchanged
Arl2bp	688.659964919485	0.0603674519732012	0.144890075026225	0.416643113493279	0.676939469305858	0.78619964407187	36674	chr8	94666677	94667782	1106	*	7.81	7.82	7.81	0	0.993	0.998	246.78	203.91	215.86	234	Promoter (<=1kb)	8	94667091	94674457	7367	1	107566	uc009mwu.3	0	ENSMUSG00000031776	ADP-ribosylation factor-like 2 binding protein	uc009mwt.3;uc009mwu.3	107566;107566	0;0	Unchanged	Unchanged	Unchanged
Arl4c	2126.76409049082	1.28082624350569	0.228629989545644	5.60217951306858	2.11673166866553e-08	2.59745142750414e-07	869	chr1	88698770	88703517	4748	*	8.84	8.73	8.95	0.22	0.336	0.701	508.29	340.13	427.92	560	Promoter (<=1kb)	1	88698225	88702191	3967	2	320982	uc007byt.2	0	ENSMUSG00000049866	ADP-ribosylation factor-like 4C	uc007byt.2	320982	0	Unchanged	FGF_up	Unchanged
Arl4d	31.6822353502206	2.80879162638808	0.606050605295908	4.63458266000192	3.57658300414065e-06	2.77040311506734e-05	6776	chr11	101665559	101665978	420	*	4.07	3.82	4.28	0.46	0.472	0.804	16.57	11.7	20.92	18	Promoter (<=1kb)	11	101665541	101667832	2292	1	80981	uc007lpq.2	18	ENSMUSG00000034936	ADP-ribosylation factor-like 4D	uc007lpq.2	80981	0	Unchanged	FGF_up	Unchanged
Arl5a	701.39558068167	0.425210827835127	0.140303671326294	3.03064648141847	0.00244030784480913	0.00881925450455693	20938	chr2	52423526	52425795	2270	*	7.86	7.86	7.86	0.01	0.975	0.995	274.4	189.71	234.88	231	Promoter (<=1kb)	2	52397951	52424874	26924	2	75423	uc008jqy.1	0	ENSMUSG00000036093	ADP-ribosylation factor-like 5A	uc008jra.2;uc008jrb.2;uc008jrc.1;uc033hmw.1;uc008jrd.2;uc008jqy.1	12298;12298;12298;12298;12298;75423	132816;132816;250064;250348;0;0	Unchanged	FGF_up	Unchanged
Arl5b	110.227562469829	1.7671691895789	0.269591245132151	6.55499472437487	5.56438438188966e-11	1.02631978599298e-09	20208	chr2	15055291	15056082	792	*	6.31	6.21	6.41	0.19	0.554	0.853	79.19	69.36	101.75	68	Promoter (<=1kb)	2	15055362	15075113	19752	1	75869	uc008ikx.1	0	ENSMUSG00000017418	ADP-ribosylation factor-like 5B	uc008iku.2;uc008ikv.2;uc008ikx.1;uc008iky.1	74455;74455;75869;75869	0;0;0;0	Unchanged	FGF_up	Unchanged
Arl6ip1	1989.69018611144	-0.915154199117748	0.126916630489378	-7.21067204186721	5.56764029335949e-13	1.38923667612177e-11	34757	chr7	118128513	118129594	1082	*	7.08	7.27	6.86	-0.41	0.133	0.441	182.32	127.03	116.97	116	Promoter (<=1kb)	7	118118890	118129625	10736	2	54208	uc009jjo.2	31	ENSMUSG00000030654	ADP-ribosylation factor-like 6 interacting protein 1	uc009jjp.1;uc009jjo.2	233789;54208	0;0	Unchanged	FGF_down	Unchanged
Arl6ip4	401.68149667224	-0.23995528046812	0.156614662774451	-1.53213802729118	0.125488377525433	0.229087687213071	29386	chr5	124115818	124117254	1437	*	7.83	7.7	7.94	0.25	0.287	0.654	234.81	180.51	223.47	269	Promoter (<=1kb)	5	124116108	124118195	2088	1	65105	uc008zoz.1	0	ENSMUSG00000029404	ADP-ribosylation factor-like 6 interacting protein 4	uc008zpa.3;uc008zpb.3;uc008zpc.3;uc008zoz.1;uc008zox.1;uc008zoy.1	19679;19679;19679;65105;66627;66627	7300;0;0;0;0;0	Unchanged	Unchanged	Unchanged
Arl6ip5	4923.50280966271	1.36711872260494	0.176852114148941	7.7302933537655	1.07299034218227e-14	3.35716768841951e-13	31709	chr6	97207247	97213152	5906	*	9.41	9.35	9.47	0.13	0.505	0.825	740.34	562.43	694.19	728	Promoter (<=1kb)	6	97210792	97233315	22524	1	65106	uc009dar.1	0	ENSMUSG00000035199	ADP-ribosylation factor-like 6 interacting protein 5	uc009dam.3;uc009dan.3;uc009dao.3;uc009dap.3;uc009daq.4;uc009dar.1	22200;22200;22200;22200;22200;65106	0;0;0;0;0;0	Unchanged	FGF_up	Unchanged
Arl8a	538.244203372518	0.756404432705789	0.131006527220743	5.77379195336784	7.7507127814953e-09	1.04438014841524e-07	1305	chr1	135145989	135148109	2121	*	8.1	7.94	8.25	0.31	0.158	0.485	283.61	207.26	294.79	315	Promoter (<=1kb)	1	135146834	135156268	9435	1	68724	uc007csu.1	0	ENSMUSG00000026426	ADP-ribosylation factor-like 8A	uc007css.1;uc007cst.1;uc011wsh.1;uc007csu.1	320139;320139;320139;68724	13264;12653;12239;0	Unchanged	FGF_up	Unchanged
Arl8b	1020.80585676703	0.342954890779374	0.122691522190281	2.79526151976084	0.00518577464340299	0.0168711863263402	31784	chr6	108782582	108784679	2098	*	7.55	7.55	7.55	0	0.991	0.998	205.34	170.48	198.75	176	Promoter (<=1kb)	6	108783059	108823723	40665	1	67166	uc009ddo.1	0	ENSMUSG00000030105	ADP-ribosylation factor-like 8B	uc009ddo.1	67166	0	Unchanged	FGF_up	Unchanged
Armc10	247.062127497357	-0.0097590865430944	0.180692716958656	-0.0540092965967596	0.956927757441054	0.976203529953523	27748	chr5	21645833	21646439	607	*	5.32	5.23	5.39	0.16	0.716	0.924	46.04	29.25	37.09	47	Promoter (<=1kb)	5	21645984	21662592	16609	1	67211	uc008wos.1	0	ENSMUSG00000038525	armadillo repeat containing 10	uc008wop.2;uc012dsq.1;uc008woq.1;uc008wos.1;uc008wot.1;uc008wou.1	320118;320118;320118;67211;67211;67211	0;0;0;0;0;0	Unchanged	Unchanged	Unchanged
Armc5	443.713070919546	0.176310897522986	0.159721354528145	1.10386552908877	0.269651473886701	0.411222958907967	35025	chr7	128238582	128239079	498	*	5.14	5.23	5.05	-0.18	0.698	0.917	44.2	30.92	34.23	32	Promoter (1-2kb)	7	128237357	128245100	7744	1	233912	uc009jyk.1	1225	ENSMUSG00000042178	armadillo repeat containing 5	uc009jyj.2;uc009jyk.1	100043133;233912	0;0	Unchanged	Unchanged	Unchanged
Armc6	218.086527496777	-0.467079596904116	0.173772828682743	-2.68787474109006	0.00719083652495701	0.0222079788491695	36126	chr8	70229249	70229522	274	*	3.1	3.67	2.15	-1.52	0.114	0.403	13.81	11.7	1.9	7	Intron (uc009lzi.2/76813, intron 3 of 7)	8	70220192	70234422	14231	2	76813	uc009lzi.2	4900	ENSMUSG00000002343	armadillo repeat containing 6	uc009lzk.2;uc009lzl.2;uc009lzm.2;uc009lzi.2;uc009lzj.1	234373;234373;234373;76813;76813	0;0;0;0;0	Unchanged	FGF_down	Unchanged
Armc7	42.5459484794444	0.592669377329896	0.323145664414503	1.83406259961351	0.0666447023502044	0.138769596252551	7152	chr11	115475741	115476270	530	*	5.18	4.96	5.38	0.42	0.356	0.717	32.23	30.09	36.14	47	Promoter (<=1kb)	11	115475677	115490466	14790	1	276905	uc007mht.1	64	ENSMUSG00000057219	armadillo repeat containing 7	uc007mhp.1;uc007mhq.1;uc011yhl.1;uc007mhr.1;uc007mhs.1;uc007mht.1	217316;217316;217316;217316;217316;276905	0;0;0;0;0;0	Unchanged	Unchanged	Unchanged
Armc8	287.704061944644	0.0797279458146139	0.160995862348001	0.495217359327394	0.620446698214458	0.739690328568284	39289	chr9	99568000	99569749	1750	*	7.53	7.62	7.44	-0.19	0.473	0.805	238.49	156.28	153.1	193	Promoter (<=1kb)	9	99478391	99568899	90509	2	74125	uc009ref.2	0	ENSMUSG00000032468	armadillo repeat containing 8	uc009ref.2;uc009reg.1;uc009reh.1	74125;74125;74125	0;0;0	Unchanged	Unchanged	Unchanged
Armc9	196.518334109899	-0.925545589188909	0.179030082668915	-5.16977691900274	2.34373600568937e-07	2.38200108333328e-06	785	chr1	86154821	86155092	272	*	3.89	3.34	4.28	0.94	0.169	0.503	11.05	9.19	19.97	19	Promoter (<=1kb)	1	86154780	86170331	15552	1	78795	uc007bva.1	41	ENSMUSG00000062590	armadillo repeat containing 9	uc007bva.1;uc007bvb.1;uc007bvc.1;uc007bvd.1;uc007bve.2;uc007bvf.1;uc007bvg.1;uc007bvh.1;uc007bvi.1;uc007bvj.2	78795;78795;78795;78795;78795;78795;78795;78795;78795;78795	0;0;0;0;0;0;0;0;0;0	Unchanged	FGF_down	Unchanged
Armcx5	54.9840090918842	0.852597733294057	0.288844836243484	2.95174995815177	0.00315978686955338	0.0110523186025467	40506	chrX	135742485	135743255	771	*	5.3	5.04	5.52	0.48	0.265	0.627	34.07	31.76	43.74	48	Promoter (<=1kb)	20	135742692	135747318	4627	1	494468	uc009uhk.1	0	ENSMUSG00000072969	armadillo repeat containing, X-linked 5	uc033jta.1;uc009uhk.1;uc009uhl.3;uc009uhm.1;uc009uhn.1;uc009uho.1;uc009uhp.1;uc009uhq.1	102465755;494468;494468;67298;67298;67298;67298;67298	-1922;0;0;0;0;0;0;0	Unchanged	FGF_up	Unchanged
Armt1	195.435398757804	-0.132074442744586	0.183172543079857	-0.721038429253047	0.470885871121028	0.612807919385728	2348	chr10	4432556	4434009	1454	*	7.94	7.89	7.99	0.11	0.61	0.88	249.54	223.97	268.16	242	Promoter (<=1kb)	10	4432605	4440469	7865	1	73419	uc007ehb.1	0	ENSMUSG00000061759	acidic residue methyltransferase 1	uc007ehd.2;uc007ehc.2;uc007ehe.1;uc007eha.1;uc007ehb.1;uc007egy.1;uc007egz.1	66084;66084;66084;73419;73419;73419;73419	0;0;-3385;0;0;0;0	Unchanged	Unchanged	Unchanged
Arnt	342.799613132497	-0.322728862964719	0.164073071295711	-1.96698251831381	0.0491852262118222	0.108481606142037	24165	chr3	95434371	95435441	1071	*	7.18	7.26	7.1	-0.16	0.539	0.845	178.64	127.86	143.59	130	Promoter (<=1kb)	3	95434390	95491622	57233	1	11863	uc008qjr.2	0	ENSMUSG00000015522	aryl hydrocarbon receptor nuclear translocator	uc012ctt.1;uc008qjq.1;uc057bql.1;uc008qjr.2;uc008qjs.2;uc008qjt.3;uc008qju.3;uc008qjv.3	100043305;100043305;100043305;11863;11863;11863;11863;11863	7022;6700;0;0;0;0;0;0	Unchanged	Unchanged	Unchanged
Arpc1a	1446.93757501087	0.332620405586959	0.118413718930495	2.80896849276557	0.0049700510362633	0.0162754815651851	30190	chr5	145083537	145084768	1232	*	6.94	6.96	6.92	-0.03	0.909	0.978	147.33	101.12	124.57	118	Promoter (<=1kb)	5	145083869	145108756	24888	1	56443	uc009ama.1	0	ENSMUSG00000029621	actin related protein 2/3 complex, subunit 1A	uc009ama.1;uc012egt.1	56443;56443	0;0	Unchanged	FGF_up	Unchanged
Arpc1b	5411.96999134284	0.639153265828715	0.117807823472048	5.42538896816447	5.78284685267806e-08	6.56377830799698e-07	30193	chr5	145113507	145117444	3938	*	9.15	9.15	9.16	0	0.992	0.998	638.13	501.42	574.37	566	Promoter (<=1kb)	5	145114256	145128186	13931	1	11867	uc009amb.2	0	ENSMUSG00000029622	actin related protein 2/3 complex, subunit 1B	uc009amb.2;uc009amc.2;uc009ama.1;uc012egt.1	11867;11867;56443;56443	0;0;0;0	Unchanged	FGF_up	Unchanged
Arpc2	12.1595019084493	2.28653685798361	0.709613335801249	3.22222926574767	0.00127197310785572	0.00506923060523226	601	chr1	74236395	74238115	1721	*	7.72	7.78	7.65	-0.13	0.573	0.863	252.31	188.03	204.45	197	Promoter (<=1kb)	1	74236518	74268213	31696	1	76709	uc007bln.1	0	ENSMUSG00000006304	actin related protein 2/3 complex, subunit 2	uc007bln.1;uc007blo.1;uc007blp.1	76709;76709;76709	0;0;0	Unchanged	FGF_up	Unchanged
Arpc3	751.121135369753	0.709292731916968	0.143557403983438	4.94083002503166	7.77907018362734e-07	7.0435944571753e-06	29296	chr5	122391338	122392496	1159	*	6.39	5.94	6.73	0.79	0.0134	0.101	64.46	58.5	89.39	123	Promoter (<=1kb)	5	122391878	122406181	14304	1	56378	uc008zlf.2	0	ENSMUSG00000029465	actin related protein 2/3 complex, subunit 3	uc008zlf.2	56378	0	Unchanged	FGF_up	Unchanged
Arpc5	1055.03128713582	0.545032710592742	0.130821825610169	4.16622156165947	3.09689730451341e-05	0.000192081559852332	1482	chr1	152766511	152767791	1281	*	7.17	7.05	7.28	0.23	0.363	0.723	151.94	112.82	151.2	160	Promoter (<=1kb)	1	152766542	152775580	9039	1	67771	uc007czj.2	0	ENSMUSG00000008475	actin related protein 2/3 complex, subunit 5	uc007czj.2;uc007czk.2	67771;67771	0;-1070	Unchanged	FGF_up	Unchanged
Arpc5l	398.425797932695	0.302278563047558	0.143750902658192	2.10279419090891	0.0354837640518746	0.0836163146585183	20839	chr2	39007184	39009322	2139	*	7.78	7.59	7.95	0.35	0.105	0.383	203.5	183.02	240.59	253	Promoter (<=1kb)	2	39008139	39015872	7734	1	74192	uc008joa.1	0	ENSMUSG00000026755	actin related protein 2/3 complex, subunit 5-like	uc008jnz.1;uc008joa.1	66489;74192	0;0	Unchanged	Unchanged	Unchanged
Arpin	151.527645877589	-0.713445081125688	0.220106331815813	-3.24136554927781	0.00118958533991692	0.00477431967182237	33933	chr7	79934063	79936250	2188	*	7.77	7.84	7.7	-0.15	0.518	0.833	256.91	202.24	203.5	211	Promoter (<=1kb)	7	79925359	79935264	9906	2	70420	uc009hzh.1	0	ENSMUSG00000039043	actin-related protein 2/3 complex inhibitor	uc009hzh.1	70420	0	Unchanged	FGF_down	Unchanged
Arrb1	266.913511498949	-0.561797606243431	0.28570663442712	-1.96634427957863	0.0492588551875392	0.108583887348113	34265	chr7	99535098	99536335	1238	*	6.79	6.65	6.91	0.26	0.352	0.714	100.37	100.28	103.65	137	Promoter (<=1kb)	7	99535486	99606771	71286	1	109689	uc009ilu.1	0	ENSMUSG00000018909	arrestin, beta 1	uc009ilu.1;uc009ilv.1	109689;109689	0;0	Unchanged	Unchanged	Unchanged
Arrb2	116.075468074821	-0.316636792312924	0.226350564598415	-1.39887785513013	0.161849614303563	0.279215314539886	5672	chr11	70431767	70432492	726	*	4.48	4.68	4.25	-0.43	0.456	0.794	31.31	20.06	17.12	21	Promoter (<=1kb)	11	70432580	70440828	8249	1	216869	uc007jur.2	-88	ENSMUSG00000060216	arrestin, beta 2	uc007jur.2;uc007jus.2;uc007jut.2;uc007juu.2	216869;216869;216869;216869	0;0;0;0	Unchanged	Unchanged	Unchanged
Arrdc1	132.127358683044	-0.795997368065672	0.218054128600622	-3.65045767843995	0.000261773441296894	0.00127650598546735	20265	chr2	24934075	24935192	1118	*	7.07	7.23	6.88	-0.35	0.212	0.565	177.72	122.85	128.38	108	Promoter (<=1kb)	2	24925352	24935281	9930	2	215705	uc008ipm.2	89	ENSMUSG00000026972	arrestin domain containing 1	uc008ipm.2;uc008ipn.2	215705;215705	0;0	Unchanged	FGF_down	Unchanged
Arrdc2	81.3257314014554	-0.12200775051045	0.239694031211446	-0.50901455448768	0.610742022318258	0.731128670948299	36206	chr8	70838484	70839576	1093	*	7.11	7.02	7.19	0.16	0.572	0.862	164.83	95.27	133.13	158	Promoter (<=1kb)	8	70835138	70839518	4381	2	70807	uc009mbs.1	0	ENSMUSG00000002910	arrestin domain containing 2	uc009mbs.1;uc009mbt.1;uc012gfj.1;uc009mbv.2;uc009mbw.2;uc009mbx.2	70807;70807;84036;84036;84036;84036	0;0;16009;17432;17432;23682	Unchanged	Unchanged	Unchanged
Arrdc3	108.211903955725	0.793239901097343	0.264922829690607	2.99423006323667	0.00275138394857524	0.00979581202066467	10354	chr13	80882549	80887242	4694	*	9.34	9.45	9.22	-0.24	0.173	0.508	711.8	688.62	570.56	618	Promoter (<=1kb)	13	80883422	80889643	6222	1	105171	uc007rhh.1	0	ENSMUSG00000074794	arrestin domain containing 3	uc007rhh.1;uc007rhi.3;uc007rhj.3	105171;105171;105171	0;0;0	Unchanged	FGF_up	Unchanged
Arsb	2368.22194786609	-0.112953763899229	0.111331553302116	-1.01457098683166	0.310310375258599	0.456647829462198	10459	chr13	93770791	93772897	2107	*	8.08	8.08	8.08	0	0.988	0.998	319.53	222.3	250.1	290	Promoter (<=1kb)	13	93771679	93873809	102131	1	11881	uc011zcv.1	0	ENSMUSG00000042082	arylsulfatase B	uc011zcv.1;uc007rlo.1	11881;11881	0;0	Unchanged	Unchanged	Unchanged
Artn	54.2074691081884	0.516237153912189	0.352338100228068	1.46517550494264	0.142873040774951	0.254488611526411	26269	chr4	117928467	117929896	1430	*	6.73	6.72	6.73	0.01	0.966	0.993	122.47	88.58	106.51	106	Promoter (<=1kb)	4	117926160	117929763	3604	2	11876	uc008ujh.2	0	ENSMUSG00000028539	artemin	uc008ujh.2;uc008uji.2;uc008ujj.2;uc012djv.2;uc008ujk.3;uc008ujl.3;uc008ujm.3;uc033idz.1	11876;11876;11876;11876;20441;20441;20441;20441	0;0;0;0;0;0;0;0	Unchanged	Unchanged	Unchanged
Arv1	151.711204467189	0.625981327404897	0.210010009047915	2.98072139629343	0.00287570284878798	0.010193736324535	37413	chr8	124722128	124723030	903	*	6.11	5.81	6.36	0.55	0.135	0.444	73.67	38.44	78.93	85	Promoter (<=1kb)	8	124722139	124734123	11985	1	68865	uc009nxn.1	0	ENSMUSG00000031982	ARV1 homolog, fatty acid homeostasis modulator	uc009nxh.1;uc009nxi.1;uc009nxj.1;uc009nxk.1;uc009nxm.1;uc009nxn.1;uc012gmw.1;uc012gmx.1	234875;234875;234875;234875;234875;68865;68865;68865	0;0;0;0;0;0;0;0	Unchanged	FGF_up	Unchanged
Arx	3.60766053990598	-1.10912141916201	1.0636182221362	-1.04278151321479	0.297049495275471	0.442078890241867	40309	chrX	93280030	93282876	2847	*	6.95	7.19	6.65	-0.54	0.0602	0.274	175.88	117	92.24	109	Distal Intergenic	20	93286507	93298357	11851	1	11878	uc009tsq.3	-3631	ENSMUSG00000035277	aristaless related homeobox	uc009tsq.3;uc009tsr.3	11878;11878	0;0	Unchanged	Unchanged	Unchanged
As3mt	322.901294397863	-0.544108172026354	0.169902301402733	-3.20247676184568	0.0013625129265069	0.00536742073091973	19753	chr19	46707149	46708529	1381	*	7.54	7.41	7.66	0.25	0.318	0.683	203.5	137.06	188.29	217	Promoter (<=1kb)	19	46707443	46741095	33653	1	57344	uc008huc.1	0	ENSMUSG00000003559	arsenic (+3 oxidation state) methyltransferase	uc008huc.1;uc008hud.1;uc008hub.1	57344;57344;66439	0;0;0	Unchanged	FGF_down	Unchanged
Asah1	3273.70325111688	-0.11166559337788	0.12353635185325	-0.903908782335814	0.366043771904632	0.512049995529513	35922	chr8	41373652	41375726	2075	*	7.35	7.32	7.38	0.06	0.807	0.949	187.85	132.04	165.46	168	Promoter (<=1kb)	8	41340646	41374697	34052	2	11886	uc012gcr.2	0	ENSMUSG00000031591	N-acylsphingosine amidohydrolase 1	uc012gcr.2	11886	0	Unchanged	Unchanged	Unchanged
Asap1	495.027111996871	-0.271038909224441	0.153400199144936	-1.76687455906336	0.0772492385428127	0.156356121772006	13101	chr15	64310934	64314480	3547	*	8.38	8.28	8.48	0.19	0.394	0.749	367.41	255.73	319.52	393	Promoter (<=1kb)	15	64086840	64312475	225636	2	13196	uc007vzh.2	0	ENSMUSG00000022377	ArfGAP with SH3 domain, ankyrin repeat and PH domain1	uc007vzh.2;uc007vzi.2;uc007vzj.2;uc007vzk.2;uc007vzl.2;uc007vzm.2;uc007vzn.1	13196;13196;13196;13196;13196;13196;13196	0;0;0;0;0;0;0	Unchanged	Unchanged	Unchanged
Asb1	428.435728893312	1.07788885538888	0.152240279383698	7.08018180045652	1.43965468563845e-12	3.36727060719192e-11	923	chr1	91540538	91541401	864	*	5.9	5.92	5.87	-0.04	0.91	0.978	69.06	51.81	51.35	66	Promoter (<=1kb)	1	91540565	91559590	19026	1	65247	uc007caz.1	0	ENSMUSG00000026311	ankyrin repeat and SOCS box-containing 1	uc007caz.1;uc007cba.1;uc033fkl.1;uc033fkm.1;uc007cbb.3;uc007cbc.1	65247;65247;65247;65247;65247;65247	0;0;0;0;0;0	Unchanged	FGF_up	Unchanged
Asb13	112.030600649122	-1.06916959921996	0.218830985935647	-4.88582361701908	1.02997375988959e-06	9.08505267763868e-06	9208	chr13	3634102	3634677	576	*	5.64	5.34	5.9	0.56	0.15	0.472	43.28	37.61	54.2	65	Promoter (<=1kb)	13	3634032	3651779	17748	1	142688	uc007piz.2	70	ENSMUSG00000033781	ankyrin repeat and SOCS box-containing 13	uc007piz.2;uc033ggn.1	142688;142688	0;0	Unchanged	FGF_down	Unchanged
Asb3	70.463975084537	0.0132470552779496	0.257625374643199	0.051419838966935	0.958990976473707	0.976675347426663	4919	chr11	30953234	30955158	1925	*	7.31	7.23	7.38	0.15	0.566	0.86	165.75	135.38	139.79	194	Promoter (<=1kb)	11	30954398	31029760	75363	1	65257	uc007iid.1	0	ENSMUSG00000020305	ankyrin repeat and SOCS box-containing 3	uc007iid.1;uc007iie.1;uc007iif.1;uc007iig.1;uc007iic.1	65257;65257;65257;65257;66753	0;0;0;0;0	Unchanged	Unchanged	Unchanged
Asb5	12.6430241620045	0.461080167532141	0.834994253463181	0.552195617658191	0.580814336535112	0.707129769814369	35991	chr8	54548682	54549068	387	*	4.39	4.69	4	-0.69	0.239	0.596	25.78	25.91	18.07	14	Promoter (1-2kb)	8	54550331	54587836	37506	1	76294	uc009lse.1	-1263	ENSMUSG00000031519	ankyrin repeat and SOCs box-containing 5	uc009lse.1	76294	-1263	Unchanged	Unchanged	Unchanged
Asb6	489.522693720238	0.473139669817191	0.141590536548393	3.34160517610214	0.000832954521665469	0.00350544804329073	20546	chr2	30827114	30828304	1191	*	7.46	7.31	7.6	0.29	0.242	0.599	186.01	131.21	179.73	209	Promoter (<=1kb)	2	30823097	30828300	5204	2	72323	uc008jcx.2	0	ENSMUSG00000039483	ankyrin repeat and SOCS box-containing 6	uc008jcv.1;uc008jcw.1;uc008jcx.2	66617;66617;72323	0;0;0	Unchanged	FGF_up	Unchanged
Asb7	210.841254279852	0.809621185534349	0.170702160240301	4.74288775487451	2.10693022872143e-06	1.71656646855341e-05	33794	chr7	66688714	66689606	893	*	5.86	5.92	5.8	-0.12	0.745	0.932	68.14	52.65	57.06	54	Promoter (<=1kb)	7	66644565	66688920	44356	2	117589	uc009hhm.4	0	ENSMUSG00000030509	ankyrin repeat and SOCS box-containing 7	uc009hhm.4;uc009hhn.4;uc012fmt.3;uc009hhp.2;uc009hhq.2;uc009hhr.2;uc009hhs.2;uc012fmu.1	117589;117589;117589;72635;72635;72635;72635;72635	0;0;0;0;0;0;0;0	Unchanged	FGF_up	Unchanged
Asb8	441.103040667474	-0.127287459261049	0.135209487903543	-0.941409225304179	0.34649518779974	0.491958955165419	13965	chr15	98144563	98146401	1839	*	7.75	7.65	7.85	0.2	0.4	0.753	231.13	169.65	210.16	250	Promoter (<=1kb)	15	98134640	98145702	11063	2	78541	uc007xlx.2	0	ENSMUSG00000048175	ankyrin repeat and SOCS box-containing 8	uc007xlx.2;uc007xly.2;uc011zyr.1	78541;78541;78541	0;0;0	Unchanged	Unchanged	Unchanged
Ascc1	74.3688489281483	-0.579050417187638	0.316237908331566	-1.83105947115145	0.0670916669535494	0.139554403659732	3043	chr10	60003256	60004210	955	*	5.77	5.83	5.72	-0.11	0.786	0.945	72.74	40.95	55.15	50	Promoter (<=1kb)	10	60003327	60099990	96664	1	69090	uc007fei.2	0	ENSMUSG00000044475	activating signal cointegrator 1 complex subunit 1	uc057kit.1;uc007fef.1;uc007feg.2;uc007feh.2;uc007fei.2;uc007fej.2	52717;52717;69090;69090;69090;69090	0;0;0;0;0;-3517	Unchanged	Unchanged	Unchanged
Ascc2	388.123889305433	0.240542664275497	0.149467399632957	1.60933196714595	0.107543772679849	0.203573514581812	4538	chr11	4636375	4638901	2527	*	7.9	7.83	7.96	0.13	0.589	0.87	267.96	187.2	227.27	270	Promoter (<=1kb)	11	4637793	4683385	45593	1	75452	uc007hva.3	0	ENSMUSG00000020412	activating signal cointegrator 1 complex subunit 2	uc007hva.3;uc011xqz.3	75452;75452	0;0	Unchanged	Unchanged	Unchanged
Ascc3	885.498210046449	0.243218464670596	0.121754005234194	1.99762187866235	0.045757669449423	0.10243410100384	2947	chr10	50591110	50594197	3088	*	8.8	8.67	8.92	0.25	0.213	0.565	454.89	361.86	528.72	443	Promoter (<=1kb)	10	50592669	50851202	258534	1	77987	uc007fak.2	0	ENSMUSG00000038774	activating signal cointegrator 1 complex subunit 3	uc007fak.2	77987	0	Unchanged	Unchanged	Unchanged
Asf1a	67.6851432583695	-0.0680627504422998	0.261067948830219	-0.260708948560221	0.794316964700975	0.872019506026091	2953	chr10	53596768	53599244	2477	*	7.33	7.49	7.15	-0.34	0.225	0.58	220.08	140.4	116.97	167	Promoter (<=1kb)	10	53596961	53609225	12265	1	66403	uc007fbr.2	0	ENSMUSG00000019857	anti-silencing function 1A histone chaperone	uc007fbr.2;uc007fbp.1;uc011xdv.1;uc007fbq.1	66403;71567;71567;71567	0;-3607;0;0	Unchanged	Unchanged	Unchanged
Asf1b	105.969456688474	-1.28198118964205	0.247309747022656	-5.18370668797218	2.17518924537323e-07	2.22948240343475e-06	36463	chr8	83955733	83956245	513	*	4.95	5.09	4.79	-0.3	0.554	0.853	42.36	25.91	29.48	26	Promoter (<=1kb)	8	83955694	83970195	14502	1	66929	uc009mlk.1	39	ENSMUSG00000005470	anti-silencing function 1B histone chaperone	uc009mlk.1	66929	0	Unchanged	FGF_down	Unchanged
Asgr1	24.4190948468368	2.38030034377567	0.501066558057141	4.75046738901347	2.02947022741345e-06	1.65911273310845e-05	5655	chr11	70062915	70063333	419	*	3.47	-0.19	4.41	4.6	0.00024	0.00504	0.92	0.84	26.63	16	Distal Intergenic	11	70054698	70057895	3198	1	11889	uc007jts.2	8217	ENSMUSG00000020884	asialoglycoprotein receptor 1	NA	NA	NA	FGF_up	FGF_up	FGF_up
Ash1l	1720.036347992	0.371081958470762	0.159540504876219	2.32594198419185	0.0200216458852123	0.0523286052088469	23972	chr3	88949413	88952237	2825	*	8.6	8.51	8.69	0.18	0.366	0.725	404.24	323.42	402.25	422	Promoter (<=1kb)	3	88950364	88985790	35427	1	192195	uc008pxi.1	0	ENSMUSG00000028053	ASH1 like histone lysine methyltransferase	uc008pxi.1;uc008pxg.2;uc008pxh.2	192195;65111;65111	0;0;0	Unchanged	Unchanged	Unchanged
Asl	328.625488565041	-0.252327875715931	0.174039875450183	-1.44982794927452	0.147106503464434	0.260345139152281	29546	chr5	130023260	130024877	1618	*	7.59	7.58	7.6	0.02	0.927	0.982	217.31	166.31	193.99	195	Promoter (<=1kb)	5	130011503	130024331	12829	2	109900	uc008zty.1	0	ENSMUSG00000025533	argininosuccinate lyase	uc008zty.1;uc008zua.2	109900;12909	0;0	Unchanged	Unchanged	Unchanged
Asns	1277.94823344445	0.42528346315252	0.213984841656013	1.98744668015399	0.046872919091111	0.104324977463121	30444	chr6	7692096	7693231	1136	*	7.03	7.02	7.04	0.03	0.917	0.98	144.57	114.49	142.64	121	Promoter (<=1kb)	6	7675171	7693182	18012	2	27053	uc009axf.1	0	ENSMUSG00000029752	asparagine synthetase	uc009axf.1	27053	0	Unchanged	Unchanged	Unchanged
Asnsd1	207.827580291924	-0.450483579921362	0.169435042628082	-2.658739142352	0.00784336648924189	0.0238655591342716	298	chr1	53352010	53352683	674	*	5.49	5.44	5.54	0.1	0.805	0.949	50.65	35.94	41.84	51	Promoter (<=1kb)	1	53325507	53352752	27246	2	70396	uc007aze.2	69	ENSMUSG00000026095	asparagine synthetase domain containing 1	uc007aze.2;uc007azg.2;uc007azh.2;uc011wku.2	70396;70396;70396;70396	0;0;0;0	Unchanged	FGF_down	Unchanged
Asph	1861.68769172814	-0.577394486426338	0.114874035722338	-5.02632716606176	4.99962657636788e-07	4.71630125025642e-06	25131	chr4	9668183	9669278	1096	*	6.59	6.63	6.55	-0.08	0.8	0.947	106.82	91.09	80.83	107	Promoter (<=1kb)	4	9449085	9669162	220078	2	65973	uc008ryf.2	0	ENSMUSG00000028207	aspartate-beta-hydroxylase	uc008ryf.2;uc008ryg.2;uc008ryh.1;uc008ryi.2;uc012dak.1;uc008ryn.2;uc008ryo.4	65973;65973;65973;65973;65973;65973;65973	0;0;0;0;0;0;0	Unchanged	FGF_down	Unchanged
Aspm	406.901615175728	-2.06378080284118	0.165491695090507	-12.4706004232569	1.08009128062681e-35	1.92675387851517e-33	1401	chr1	139454779	139455644	866	*	5.98	6.49	5.16	-1.33	0.00037	0.007	104.97	75.21	30.43	41	Promoter (<=1kb)	1	139454819	139458444	3626	1	12316	uc007cwj.1	0	ENSMUSG00000033952	abnormal spindle microtubule assembly	uc007cwh.1;uc007cwi.1;uc007cwj.1;uc007cwg.2;uc011wtd.1	12316;12316;12316;226470;226470	0;0;0;32396;31745	FGF_down	FGF_down	FGF_down
Aspscr1	676.553262537652	0.269178168532487	0.216858919677081	1.24125938159848	0.21450994458056	0.346104254494711	7488	chr11	120672321	120674242	1922	*	8.19	8.23	8.15	-0.08	0.711	0.922	340.7	260.74	247.24	320	Promoter (<=1kb)	11	120672973	120709447	36475	1	68938	uc007mua.3	0	ENSMUSG00000025142	alveolar soft part sarcoma chromosome region, candidate 1 (human)	uc007mua.3;uc007mub.2;uc011yji.2	68938;68938;68938	0;0;0	Unchanged	Unchanged	Unchanged
Asrgl1	65.1669537122664	-1.13198281733579	0.294372041680387	-3.84541551865457	0.00012034832421076	0.000645313221609243	18999	chr19	9135188	9135595	408	*	5.26	5.36	5.15	-0.22	0.654	0.9	50.65	31.76	22.82	48	Promoter (<=1kb)	19	9111719	9135566	23848	2	66514	uc008gon.1	0	ENSMUSG00000024654	asparaginase like 1	uc008gon.1	66514	0	Unchanged	FGF_down	Unchanged
Asxl1	1040.96274588211	0.408584659172424	0.123303379152622	3.31365338063191	0.000920855852383475	0.0038242074870352	22489	chr2	153345731	153348403	2673	*	8.53	8.53	8.53	0	0.995	0.999	423.58	315.06	337.58	400	Promoter (<=1kb)	2	153346139	153404007	57869	1	228790	uc033hqy.1	0	ENSMUSG00000042548	additional sex combs like 1	uc033hqy.1;uc008nhr.2	228790;72326	0;0	Unchanged	FGF_up	Unchanged
Atad2	421.848842688346	-1.30882051634109	0.174581011259516	-7.49692367399295	6.533299583129e-14	1.8117400607322e-12	12925	chr15	58132996	58135090	2095	*	8.04	8.05	8.03	-0.02	0.942	0.986	313.08	215.61	252	270	Promoter (<=1kb)	15	58094047	58135082	41036	2	70472	uc007vtf.1	0	ENSMUSG00000022360	ATPase family, AAA domain containing 2	uc007vtf.1;uc007vth.1	70472;70472	0;0	Unchanged	FGF_down	Unchanged
Atad2b	316.110418393795	0.370067092267342	0.156796193432768	2.3601790589771	0.0182661160249211	0.0485903892120758	7606	chr12	4916612	4918860	2249	*	8.29	8.31	8.28	-0.03	0.904	0.976	380.3	254.05	280.53	341	Promoter (<=1kb)	12	4917353	4954994	37642	1	320817	uc007myt.1	0	ENSMUSG00000052812	ATPase family, AAA domain containing 2B	uc007myt.1;uc033gcm.1	320817;320817	0;0	Unchanged	FGF_up	Unchanged
Atad3a	1888.67457592031	-0.1163215079207	0.127509558602152	-0.912257160921089	0.361633359790719	0.508008916922481	27578	chr4	155760015	155761081	1067	*	7.54	7.54	7.55	0.01	0.967	0.993	227.44	144.58	164.51	210	Promoter (<=1kb)	4	155740640	155761098	20459	2	108888	uc008wen.2	17	ENSMUSG00000029036	ATPase family, AAA domain containing 3A	uc008wen.2;uc012dqx.1;uc008wep.1	108888;70448;70448	0;0;0	Unchanged	Unchanged	Unchanged
Atad5	272.397958352639	-0.611666423819365	0.156782638099635	-3.90136580959081	9.56514798025767e-05	0.000524175372123061	6056	chr11	80088580	80090498	1919	*	7.21	7.4	6.99	-0.41	0.103	0.381	183.24	154.61	120.77	134	Promoter (<=1kb)	11	80089400	80102994	13595	1	237877	uc007klf.2	0	ENSMUSG00000017550	ATPase family, AAA domain containing 5	uc007klf.2;uc007klg.2;uc011yar.1	237877;237877;237877	0;0;0	Unchanged	FGF_down	Unchanged
Atat1	20.3287394258887	0.251079942116959	0.468688212858712	0.535707822873386	0.592160496210129	0.716854274354651	16533	chr17	35909120	35910488	1369	*	6.71	6.41	6.96	0.55	0.0531	0.253	91.16	79.39	114.11	135	Promoter (<=1kb)	17	35897595	35910068	12474	2	73242	uc008cja.4	0	ENSMUSG00000024426	alpha tubulin acetyltransferase 1	uc008cjg.1;uc008cjh.1;uc012arw.3;uc008cja.4;uc008cjb.4;uc008cjc.4;uc008cjd.4;uc008cje.4;uc008cjf.1	66973;66973;73242;73242;73242;73242;73242;73242;73242	0;0;0;0;0;0;0;0;0	Unchanged	Unchanged	Unchanged
Ate1	337.3435490876	-0.639306267750872	0.166806340457853	-3.83262570233297	0.000126782779506904	0.000675270846999338	35068	chr7	130517785	130521064	3280	*	8.56	8.55	8.56	0.02	0.929	0.983	418.05	330.1	365.16	392	Promoter (<=1kb)	7	130391493	130519580	128088	2	11907	uc009kaa.3	0	ENSMUSG00000030850	arginyltransferase 1	uc009kaa.3;uc009kab.3;uc009kac.3;uc033jcn.2	11907;11907;11907;11907	0;0;0;0	Unchanged	FGF_down	Unchanged
Atf1	442.205131952145	0.646875600678362	0.147296495456638	4.39165642517812	1.12490360148916e-05	7.73136736342635e-05	14109	chr15	100226513	100229576	3064	*	9.65	9.66	9.64	-0.02	0.917	0.98	935.55	681.94	720.81	873	Promoter (<=1kb)	15	100227859	100261248	33390	1	11908	uc007xqs.1	0	ENSMUSG00000023027	activating transcription factor 1	uc007xqs.1	11908	0	Unchanged	FGF_up	Unchanged
Atf2	414.745776941054	0.385206906007642	0.150407830399719	2.56108279059626	0.0104346486703072	0.0305374439048754	21165	chr2	73891656	73892626	971	*	7.49	7.44	7.54	0.11	0.653	0.9	194.29	152.93	184.48	189	Promoter (<=1kb)	2	73816509	73892639	76131	2	11909	uc008kdd.2	13	ENSMUSG00000027104	activating transcription factor 2	uc008kdd.2;uc008kde.2;uc008kdf.2;uc008kdg.2;uc008kdh.2;uc008kdi.2;uc033hnn.1;uc008kdj.2;uc008kdk.2;uc008kdl.2	11909;11909;11909;11909;11909;11909;11909;11909;11909;11909	0;0;0;0;0;0;0;0;0;0	Unchanged	FGF_up	Unchanged
Atf3	5.15297960078244	5.75952030803582	1.50623081156833	3.82379663448714	0.000131412318740001	0.000697246946918536	2227	chr1	191216329	191216943	615	*	4.6	4.39	4.78	0.38	0.482	0.812	20.26	21.73	22.82	32	Promoter (1-2kb)	1	191170296	191218039	47744	2	11910	uc011wyt.2	1096	ENSMUSG00000026628	activating transcription factor 3	uc011wyt.2	11910	0	Unchanged	FGF_up	Unchanged
Atf4	2141.33429114214	0.569201566972449	0.160664871559078	3.54278792525689	0.000395920957688815	0.00182212063392249	13599	chr15	80253381	80258206	4826	*	9.65	9.62	9.67	0.06	0.748	0.932	840.71	729.57	756	878	Promoter (<=1kb)	15	80255184	80257545	2362	1	11911	uc007wvl.2	0	ENSMUSG00000042406	activating transcription factor 4	uc007wvl.2;uc033gvi.1;uc007wvk.2;uc007wvi.2;uc007wvj.2;uc007wvh.2;uc007wvm.1	11911;11911;239555;239555;239555;239555;66538	0;0;0;0;0;0;0	Unchanged	FGF_up	Unchanged
Atf6	2958.50408009714	0.538614542443112	0.187105485516156	2.87866783251849	0.00399358721170213	0.0135365827645285	1869	chr1	170866477	170869192	2716	*	8.14	8.18	8.09	-0.09	0.675	0.908	333.34	248.2	270.07	275	Promoter (<=1kb)	1	170704457	170867771	163315	2	226641	uc007dmj.1	0	ENSMUSG00000026663	activating transcription factor 6	uc007dmj.1;uc007dmk.1;uc007dml.1;uc007dmm.1;uc007dmn.1	226641;80915;80915;80915;80915	0;0;0;0;0	Unchanged	FGF_up	Unchanged
Atf6b	1352.23776933946	0.124047740271197	0.161003794145647	0.770464701962121	0.441024285677879	0.586592728958604	16428	chr17	34647149	34648095	947	*	7.17	6.9	7.4	0.5	0.0517	0.249	136.28	101.96	157.86	180	Promoter (<=1kb)	17	34647146	34655074	7929	1	12915	uc008cdh.4	3	ENSMUSG00000015461	activating transcription factor 6 beta	uc008cdh.4;uc012aqj.2;uc008cdg.1	12915;12915;56299	0;0;0	Unchanged	Unchanged	Unchanged
Atf7	743.477125302666	0.484914931390186	0.131724681272108	3.68127617927943	0.000232069459138621	0.0011475772344331	14230	chr15	102624067	102626235	2169	*	8.32	8.31	8.33	0.02	0.917	0.98	334.26	302.53	314.76	331	Promoter (<=1kb)	15	102523839	102625464	101626	2	223922	uc007xwk.2	0	ENSMUSG00000099083	activating transcription factor 7	uc007xwk.2;uc007xwl.2;uc007xwm.2;uc007xwn.2;uc007xwo.3;uc007xwp.3	223922;223922;223922;223922;223922;223922	0;0;0;0;0;0	Unchanged	FGF_up	Unchanged
Atf7ip	505.478142715045	-0.536317623535176	0.187972941386136	-2.85316396913462	0.00432862803393544	0.0144634504505441	32346	chr6	136532001	136534773	2773	*	7.29	7.26	7.32	0.06	0.797	0.947	159.3	146.25	175.92	143	Promoter (<=1kb)	6	136532950	136587683	54734	1	54343	uc009elw.1	0	ENSMUSG00000030213	activating transcription factor 7 interacting protein	uc009elu.1;uc009elv.1;uc009elw.1	54343;54343;54343	0;0;0	Unchanged	FGF_down	Unchanged
Atg10	32.9172749219481	-0.548751426830208	0.423458699766867	-1.29587944971333	0.195017020276899	0.321761930749517	10397	chr13	91223186	91224916	1731	*	7.57	7.58	7.55	-0.03	0.886	0.971	201.66	182.18	192.09	183	Promoter (<=1kb)	13	90935349	91223987	288639	2	66795	uc007rjr.1	0	ENSMUSG00000021619	autophagy related 10	uc007rjr.1	66795	0	Unchanged	Unchanged	Unchanged
Atg101	121.745068059941	0.223048335588487	0.220820305321686	1.01008978890576	0.312452273931216	0.458775132435614	14170	chr15	101283497	101285002	1506	*	7.42	7.41	7.43	0.02	0.922	0.981	194.29	146.25	178.78	167	Promoter (<=1kb)	15	101284301	101290934	6634	1	68118	uc007xsw.1	0	ENSMUSG00000037204	autophagy related 101	uc007xsw.1	68118	0	Unchanged	Unchanged	Unchanged
Atg14	66.4741836776186	0.0609360864531819	0.256227900058585	0.237819872228002	0.812020804995254	0.882697356660022	11563	chr14	47567891	47568419	529	*	5.41	5.47	5.36	-0.11	0.798	0.947	55.25	33.43	40.89	41	Promoter (<=1kb)	14	47540893	47568434	27542	2	100504663	uc007tik.2	15	ENSMUSG00000037526	autophagy related 14	uc007tik.2	100504663	0	Unchanged	Unchanged	Unchanged
Atg16l1	686.887447614429	0.702186340250143	0.128734399284708	5.45453541673187	4.91010484729222e-08	5.63742297164617e-07	842	chr1	87755997	87757131	1135	*	7.29	7.26	7.32	0.05	0.831	0.957	159.3	147.92	140.74	178	Promoter (<=1kb)	1	87756011	87767983	11973	1	77040	uc007bxi.2	0	ENSMUSG00000026289	autophagy related 16-like 1 (S. cerevisiae)	uc007bxi.2;uc007bxj.2;uc007bxl.2;uc007bxm.2;uc007bxn.2	77040;77040;77040;77040;77040	0;0;0;0;0	Unchanged	FGF_up	Unchanged
Atg2a	313.543164688739	-0.485124635431552	0.169832267008663	-2.85649272647821	0.00428349818601638	0.0143407199773859	18857	chr19	6241705	6243018	1314	*	7.36	7.1	7.59	0.49	0.0628	0.281	168.51	105.3	187.33	198	Promoter (<=1kb)	19	6241668	6262304	20637	1	329015	uc008ghu.1	37	ENSMUSG00000024773	autophagy related 2A	uc008ghu.1;uc008ghv.1	329015;329015	0;-2441	Unchanged	FGF_down	Unchanged
Atg4b	423.275146060067	0.171188351393946	0.164675755551792	1.03954799430148	0.298549949161153	0.443649010614708	977	chr1	93753535	93755655	2121	*	7.89	7.84	7.94	0.09	0.674	0.908	258.75	200.57	231.08	259	Promoter (<=1kb)	1	93755033	93789529	34497	1	66615	uc007cej.1	0	ENSMUSG00000026280	autophagy related 4B, cysteine peptidase	uc007cej.1;uc007cef.1;uc007ceg.1;uc007ceh.1	66615;67026;67026;67026	0;0;0;0	Unchanged	Unchanged	Unchanged
Atg4c	36.6683264907614	-1.22183389469474	0.352272214767847	-3.46843674713303	0.000523495746397888	0.00233637832746361	25964	chr4	99193737	99195276	1540	*	6.97	6.87	7.06	0.2	0.448	0.79	119.71	113.66	130.28	137	Promoter (<=1kb)	4	99193934	99226626	32693	1	242557	uc008tut.1	0	ENSMUSG00000028550	autophagy related 4C, cysteine peptidase	uc008tut.1;uc008tuu.1;uc012dhi.1	242557;242557;242557	0;0;0	Unchanged	FGF_down	Unchanged
Atg4d	379.40563850598	0.453230498341951	0.147064799976282	3.08184214315763	0.00205723902953982	0.00762422352901084	37770	chr9	21264153	21266023	1871	*	7.19	7.25	7.13	-0.12	0.676	0.909	186.01	118.67	123.62	157	Promoter (<=1kb)	9	21265285	21274837	9553	1	235040	uc009okt.2	0	ENSMUSG00000002820	autophagy related 4D, cysteine peptidase	uc009okt.2	235040	0	Unchanged	FGF_up	Unchanged
Atg7	234.760956839198	-0.0802732018015422	0.178232784211882	-0.450384042175506	0.652433549391377	0.766301668860627	31861	chr6	114642685	114644140	1456	*	6.9	6.7	7.08	0.38	0.149	0.47	109.58	98.61	136.94	134	Promoter (<=1kb)	6	114643097	114860614	217518	1	74244	uc009dhz.2	0	ENSMUSG00000030314	autophagy related 7	uc009dhz.2;uc009dia.2;uc009dib.2;uc009dic.2	74244;74244;74244;74244	0;0;0;0	Unchanged	Unchanged	Unchanged
Atg9a	602.457692361035	-0.339826103584129	0.164129606690629	-2.07047412368857	0.0384079667960841	0.0889980649761141	639	chr1	75191229	75193224	1996	*	7.7	7.81	7.59	-0.22	0.356	0.717	253.23	194.72	182.58	203	Promoter (<=1kb)	1	75180861	75192010	11150	2	245860	uc007boa.2	0	ENSMUSG00000033124	autophagy related 9A	uc007boa.2;uc007bob.2;uc011wnh.2;uc033fjn.1;uc007bnz.1;uc007boc.1;uc033fjo.1;uc033fjp.1;uc029qpe.3;uc029qpf.3;uc029qpg.3;uc007boe.2	245860;245860;245860;245860;245860;245860;245860;52231;52231;52231;52231;52231	0;0;0;0;-1602;-1602;0;0;0;0;0;0	Unchanged	Unchanged	Unchanged
Atic	1514.00350520148	-0.235055432235446	0.141245505496906	-1.66416220755849	0.0960800182441268	0.185786827059344	554	chr1	71556691	71558306	1616	*	7.47	7.41	7.53	0.12	0.616	0.882	189.69	150.43	160.71	210	Promoter (<=1kb)	1	71557156	71563198	6043	1	108147	uc007bjr.2	0	ENSMUSG00000026192	5-aminoimidazole-4-carboxamide ribonucleotide formyltransferase/IMP cyclohydrolase	uc007bjr.2;uc007bjs.2;uc007bjt.2	108147;108147;108147	0;0;0	Unchanged	Unchanged	Unchanged
Atl1	40.5300778506213	-0.830245125809349	0.351931132425321	-2.35911247773888	0.0183187024756338	0.0486869317297698	8200	chr12	69894710	69895266	557	*	4.63	4.48	4.77	0.29	0.583	0.868	21.18	23.4	26.63	28	Promoter (1-2kb)	12	69893105	69964085	70981	1	73991	uc007nsy.2	1605	ENSMUSG00000021066	atlastin GTPase 1	uc057kok.1;uc011yne.1;uc011ynf.1;uc007nsx.1;uc007nsy.2	399510;399510;399510;399510;73991	0;0;0;0;0	Unchanged	FGF_down	Unchanged
Atl3	1366.84627996297	-1.02047861391452	0.121726159182895	-8.38339614725901	5.1422047290793e-17	2.09046363680122e-15	18932	chr19	7493425	7496133	2709	*	8.82	8.89	8.75	-0.14	0.517	0.833	561.7	388.6	389.88	471	Promoter (<=1kb)	19	7494040	7538609	44570	1	109168	uc012bhw.1	0	ENSMUSG00000024759	atlastin GTPase 3	uc012bhw.1;uc008glg.2	109168;109168	0;0	Unchanged	FGF_down	Unchanged
Atm	412.032781609899	-1.06360746300823	0.148246069810715	-7.17460816577648	7.25145710441071e-13	1.76876357779422e-11	38267	chr9	53535215	53536714	1500	*	6.19	6.27	6.1	-0.18	0.627	0.887	97.61	56.83	63.71	73	Promoter (<=1kb)	9	53437122	53536671	99550	2	11920	uc009pmd.2	0	ENSMUSG00000034218	ataxia telangiectasia mutated	uc012gtj.1;uc009pmd.2;uc009pme.2;uc009pmf.1	11920;11920;11920;244879	-1249;0;0;0	Unchanged	FGF_down	Unchanged
Atmin	487.433999301088	0.532433384369895	0.137230496401151	3.87984739786621	0.00010452202010532	0.000568615013335815	37084	chr8	116942884	116944568	1685	*	6.74	6.37	7.04	0.67	0.0165	0.117	77.35	87.75	139.79	123	Promoter (<=1kb)	8	116943393	116960445	17053	1	234776	uc009nop.2	0	ENSMUSG00000047388	ATM interactor	uc009nop.2;uc009noo.1;uc012glh.1	234776;72155;72155	0;0;0	Unchanged	FGF_up	Unchanged
Atn1	1426.35661520711	-0.0564415251645273	0.15791874442407	-0.357408649431514	0.720785902499071	0.818854950366576	32124	chr6	124755292	124759466	4175	*	8.56	8.68	8.43	-0.25	0.203	0.552	427.26	391.11	328.07	362	Promoter (<=1kb)	6	124739183	124756021	16839	2	13498	uc009dro.2	0	ENSMUSG00000004263	atrophin 1	uc009dro.2;uc009drq.1;uc009drr.1;uc009drs.2;uc009drt.2	13498;13498;13498;13807;13807	0;0;0;0;0	Unchanged	Unchanged	Unchanged
Atoh8	95.0057999531128	-3.91646127464734	0.382576122785016	-10.2370771237288	1.35261008216354e-24	1.13051718195934e-22	31281	chr6	72234002	72235829	1828	*	5.54	6.08	4.68	-1.4	0.00275	0.0322	87.48	47.64	17.12	34	Promoter (<=1kb)	6	72206177	72235577	29401	2	71093	uc009cic.2	0	ENSMUSG00000037621	atonal bHLH transcription factor 8	uc009cic.2;uc012enh.2	71093;71093	0;0	FGF_down	FGF_down	FGF_down
Atox1	288.353871484052	0.0841839157400743	0.162909071699034	0.51675400800024	0.605327889384464	0.727269695810526	5274	chr11	55460166	55461138	973	*	5.42	5.77	4.96	-0.81	0.0743	0.312	71.82	37.61	32.33	30	Promoter (<=1kb)	11	55446643	55461138	14496	2	11927	uc007izj.1	0	ENSMUSG00000018585	antioxidant 1 copper chaperone	uc007izj.1	11927	0	Unchanged	Unchanged	Unchanged
Atp10a	313.654744274818	-0.525445024314598	0.326245093798876	-1.61058368172281	0.107270492872683	0.203217139136837	33678	chr7	58657863	58658806	944	*	4.84	4.96	4.7	-0.26	0.634	0.89	40.52	21.73	19.02	33	Promoter (<=1kb)	7	58658202	58829426	171225	1	11982	uc009hef.2	0	ENSMUSG00000025324	ATPase, class V, type 10A	uc009hef.2	11982	0	Unchanged	Unchanged	Unchanged
Atp11a	3208.79306276811	-0.219854880464867	0.156472681593074	-1.40506878406179	0.16000082547019	0.276931493923881	35496	chr8	12756434	12758328	1895	*	6.39	6.47	6.3	-0.17	0.619	0.884	114.18	63.51	69.42	88	Promoter (<=1kb)	8	12757016	12859720	102705	1	50770	uc009kwf.1	0	ENSMUSG00000031441	ATPase, class VI, type 11A	uc009kwf.1;uc009kwg.1;uc009kwh.1;uc009kwj.2;uc012fzr.1	50770;50770;50770;50770;50770	0;0;0;0;0	Unchanged	Unchanged	Unchanged
Atp13a1	2607.29180525833	-0.0750549810794084	0.134128063937859	-0.559577010775173	0.575767989250803	0.702991011086484	36099	chr8	69790668	69792147	1480	*	7.24	7.19	7.3	0.11	0.693	0.915	172.19	119.51	133.13	181	Promoter (<=1kb)	8	69791163	69807749	16587	1	170759	uc009lxr.3	0	ENSMUSG00000031862	ATPase type 13A1	uc009lxr.3;uc012gep.2	170759;170759	0;0	Unchanged	Unchanged	Unchanged
Atp13a2	983.328623032731	-0.585271595481037	0.127423525270849	-4.59312041663417	4.36666921082671e-06	3.32847132702812e-05	27156	chr4	140986915	140987316	402	*	4.3	3.9	4.61	0.71	0.239	0.596	16.57	13.37	20.92	28	Promoter (<=1kb)	4	140986873	140998162	11290	1	74772	uc008vnm.2	42	ENSMUSG00000036622	ATPase type 13A2	uc008vnm.2;uc012dnx.1;uc008vnn.2;uc008vno.2	74772;74772;74772;74772	0;0;0;0	Unchanged	FGF_down	Unchanged
Atp13a3	4759.56377065958	0.704491794721391	0.185212959941177	3.80368520078257	0.000142559322918773	0.000749282773757772	14828	chr16	30387530	30390009	2480	*	8.06	8.19	7.92	-0.27	0.247	0.605	336.1	248.2	214.91	270	Promoter (<=1kb)	16	30312423	30388530	76108	2	224088	uc012aee.2	0	ENSMUSG00000022533	ATPase type 13A3	uc012aee.2;uc012aef.2	224088;224088	0;0	Unchanged	FGF_up	Unchanged
Atp1a1	23668.5955961344	0.491992573574425	0.140418220671656	3.50376590175478	0.000458728426577183	0.00207994011929078	24356	chr3	101600563	101605192	4630	*	8.68	8.35	8.95	0.6	0.00245	0.0297	363.72	290.83	511.6	480	Promoter (<=1kb)	3	101576219	101604707	28489	2	11928	uc008qrj.2	0	ENSMUSG00000033161	ATPase, Na+/K+ transporting, alpha 1 polypeptide	uc008qrj.2	11928	0	Unchanged	FGF_up	FGF_up
Atp1a3	8026.50188610424	0.884658172129338	0.146486427480741	6.03918183645816	1.54897611983666e-09	2.29694324867094e-08	32997	chr7	24996358	24996906	549	*	4.68	3.28	5.38	2.09	0.000428	0.00785	11.97	7.52	54.2	29	Intron (uc009frf.3/232975, intron 8 of 22)	7	24978167	25005937	27771	2	232975	uc009frf.3	9031	ENSMUSG00000040907	ATPase, Na+/K+ transporting, alpha 3 polypeptide	uc009frf.3;uc009fre.3;uc009frg.2	232975;232975;232975	0;0;0	FGF_up	FGF_up	FGF_up
Atp1b1	5601.63642928806	-0.73341420808314	0.149777179771178	-4.89670194887909	9.74584852893765e-07	8.62832456428614e-06	1707	chr1	164454716	164458798	4083	*	8.84	8.79	8.89	0.1	0.628	0.887	494.48	393.62	523.02	427	Promoter (<=1kb)	1	164437099	164458355	21257	2	11931	uc007dip.2	0	ENSMUSG00000026576	ATPase, Na+/K+ transporting, beta 1 polypeptide	uc007dip.2	11931	0	Unchanged	FGF_down	Unchanged
Atp2a1	2.56198316164974	-1.37821108668212	1.26380917112231	-1.0905215108213	0.275483483039256	0.418158317155852	34918	chr7	126465389	126465760	372	*	3.88	3.98	3.77	-0.2	0.763	0.938	15.65	15.88	12.36	15	Promoter (2-3kb)	7	126445860	126463073	17214	2	11937	uc009jrf.1	-2316	ENSMUSG00000030730	ATPase, Ca++ transporting, cardiac muscle, fast twitch 1	uc009jrf.1;uc009jrg.2;uc009jrh.2;uc009jri.2;uc009jrj.2;uc009jrk.2;uc009jrl.2;uc009jrm.2;uc009jrn.2	11937;20399;20399;20399;20399;20399;20399;20399;20399	-2316;7334;0;0;0;0;0;0;0	Unchanged	Unchanged	Unchanged
Atp2a2	20984.7293287791	0.675135336955851	0.144120390257885	4.68452337485198	2.80612143876153e-06	2.22848926485567e-05	29301	chr5	122500621	122503395	2775	*	8.75	8.75	8.76	0	0.995	0.999	471.46	391.95	386.08	478	Promoter (<=1kb)	5	122453513	122502225	48713	2	11938	uc008zli.2	0	ENSMUSG00000029467	ATPase, Ca++ transporting, cardiac muscle, slow twitch 2	uc008zli.2;uc008zlj.2	11938;11938	0;0	Unchanged	FGF_up	Unchanged
Atp2b1	7859.48606627031	2.20572510541847	0.465415147841725	4.73926367813146	2.14496234805917e-06	1.74280013487445e-05	3913	chr10	98913383	98917422	4040	*	8.11	7.88	8.3	0.42	0.0496	0.242	264.28	207.26	313.81	317	Promoter (<=1kb)	10	98915152	99026143	110992	1	67972	uc007gxf.2	0	ENSMUSG00000019943	ATPase, Ca++ transporting, plasma membrane 1	uc007gxf.2	67972	0	Unchanged	FGF_up	Unchanged
Atp2c1	1790.64273123278	0.650387704942255	0.128247026379459	5.07136674668681	3.94968777313924e-07	3.82549985936469e-06	39380	chr9	105494144	105495912	1769	*	7.53	7.38	7.67	0.28	0.257	0.618	196.13	137.89	184.48	222	Promoter (<=1kb)	9	105411362	105495133	83772	2	235574	uc009rif.3	0	ENSMUSG00000032570	ATPase, Ca++-sequestering	uc009rif.3;uc009rig.3;uc009rih.1;uc009rii.3;uc009rik.1	235574;235574;235574;235574;235574	0;0;0;0;0	Unchanged	FGF_up	Unchanged
Atp2c2	26.0207507088666	0.716984698402069	0.483496396536269	1.48291632272441	0.138096644125491	0.24756728522392	37142	chr8	119708429	119710621	2193	*	7.01	6.19	7.53	1.34	6.93e-07	4.51e-05	63.54	82.73	186.38	183	Intron (uc009nqg.1/69047, intron 1 of 26)	8	119700009	119757718	57710	1	69047	uc009nqg.1	8420	ENSMUSG00000034112	ATPase, Ca++ transporting, type 2C, member 2	uc009nqg.1	69047	0	FGF_up	Unchanged	Unchanged
Atp5a1	6687.92976407292	0.0244433953039816	0.115561554811105	0.211518401114768	0.832482775007435	0.895171761303541	18511	chr18	77772942	77775222	2281	*	8.42	8.41	8.44	0.03	0.891	0.973	392.27	288.32	368.96	325	Promoter (<=1kb)	18	77773768	77782869	9102	1	11946	uc008fru.2	0	ENSMUSG00000025428	ATP synthase, H+ transporting, mitochondrial F1 complex, alpha subunit 1	uc008fru.2	11946	0	Unchanged	Unchanged	Unchanged
Atp5b	13314.5271461412	0.194394658830402	0.120922227901525	1.60760070504747	0.107922657716842	0.20416138098001	4350	chr10	128083233	128084388	1156	*	7.88	7.91	7.84	-0.07	0.756	0.936	275.33	206.42	227.27	231	Promoter (<=1kb)	10	128083307	128090388	7082	1	11947	uc007hle.1	0	ENSMUSG00000025393	ATP synthase, H+ transporting mitochondrial F1 complex, beta subunit	uc007hle.1;uc011xpy.2	11947;751518	0;-898	Unchanged	Unchanged	Unchanged
Atp5c1	1489.28245332422	-0.176485464415672	0.113768787256458	-1.55126435529139	0.120838345221448	0.223120639902169	20157	chr2	10079183	10081246	2064	*	8.15	8.2	8.1	-0.11	0.621	0.884	328.73	260.74	279.58	268	Promoter (<=1kb)	2	10056030	10080510	24481	2	11949	uc008ihm.4	0	ENSMUSG00000025781	ATP synthase, H+ transporting, mitochondrial F1 complex, gamma polypeptide 1	uc008ihm.4;uc008ihn.4;uc008iho.1;uc008ihp.1;uc012bpd.1	11949;11949;16588;16588;16588	0;0;0;0;0	Unchanged	Unchanged	Unchanged
Atp5e	520.104425422813	0.282694673126066	0.188194418328555	1.50214164499039	0.133060531664019	0.240051241426167	23110	chr2	174463100	174464456	1357	*	7.3	7.2	7.38	0.18	0.465	0.799	165.75	128.7	156.9	177	Promoter (<=1kb)	2	174461075	174464101	3027	2	67126	uc008off.1	0	ENSMUSG00000016252	ATP synthase, H+ transporting, mitochondrial F1 complex, epsilon subunit	uc008ofe.2;uc008ofg.1;uc008off.1	545486;66390;67126	12505;0;0	Unchanged	Unchanged	Unchanged
Atp5f1	1180.62000322129	0.035398326113569	0.148289992508141	0.23871014837111	0.81133034696012	0.882349436475647	24436	chr3	105959432	105960441	1010	*	7.24	7.18	7.29	0.11	0.676	0.908	174.96	115.33	169.27	144	Promoter (<=1kb)	3	105942678	105960248	17571	2	11950	uc008qvl.2	0	ENSMUSG00000000563	ATP synthase, H+ transporting, mitochondrial F0 complex, subunit B1	uc008qvl.2;uc008qvm.2;uc008qvn.1;uc008qvo.1;uc008qvp.1	11950;11950;11950;70465;70465	0;0;0;0;0	Unchanged	Unchanged	Unchanged
Atp5g1	576.392196999607	-0.112312753372424	0.16037393805361	-0.700317986422956	0.483728741526772	0.623748615678927	6467	chr11	96073996	96075653	1658	*	7.3	7.29	7.32	0.03	0.904	0.976	184.16	128.7	171.17	148	Promoter (<=1kb)	11	96072793	96075631	2839	2	11951	uc007lbf.2	0	ENSMUSG00000006057	ATP synthase, H+ transporting, mitochondrial F0 complex, subunit C1 (subunit 9)	uc007lbf.2;uc007lbg.2	11951;11951	0;0	Unchanged	Unchanged	Unchanged
Atp5g2	161.641559358776	-0.278678394556313	0.181155917267488	-1.53833448423784	0.123966852244169	0.227073075558974	14231	chr15	102669172	102671777	2606	*	8.85	8.84	8.86	0.02	0.917	0.98	500.01	413.67	443.14	483	Promoter (<=1kb)	15	102662868	102671047	8180	2	67942	uc007xwr.1	0	ENSMUSG00000062683	ATP synthase, H+ transporting, mitochondrial F0 complex, subunit C2 (subunit 9)	uc007xwr.1;uc012aad.1	67942;751542	0;89	Unchanged	Unchanged	Unchanged
Atp5g3	2536.00898766151	0.169307966693529	0.136124939778301	1.24376890060904	0.213584629340846	0.344874829759767	21168	chr2	73910221	73912054	1834	*	8.33	8.23	8.43	0.2	0.354	0.715	338.86	260.74	311.91	377	Promoter (<=1kb)	2	73908447	73911326	2880	2	228033	uc008kdm.2	0	ENSMUSG00000018770	ATP synthase, H+ transporting, mitochondrial F0 complex, subunit C3 (subunit 9)	uc008kdm.2;uc056zng.1;uc056znh.1	228033;228033;228033	0;0;0	Unchanged	Unchanged	Unchanged
Atp5h	314.40807796011	0.190979343107132	0.181912399626026	1.04984236093717	0.29379059556048	0.43853942776806	7146	chr11	115419250	115419927	678	*	5.9	5.65	6.11	0.46	0.215	0.568	54.33	45.96	55.15	83	Promoter (<=1kb)	11	115415697	115419919	4223	2	71679	uc007mhm.1	0	ENSMUSG00000034566	ATP synthase, H+ transporting, mitochondrial F0 complex, subunit D	uc007mhn.2;uc007mhm.1	70382;71679	0;0	Unchanged	Unchanged	Unchanged
Atp5j	19.8536522392316	0.724194762317648	0.444727677788671	1.62840047626129	0.103439996717505	0.197179400441407	15359	chr16	84833896	84836816	2921	*	8.95	8.83	9.06	0.24	0.205	0.555	493.56	413.67	514.46	556	Promoter (<=1kb)	16	84827871	84834998	7128	2	11957	uc056zct.1	0	ENSMUSG00000022890	ATP synthase, H+ transporting, mitochondrial F0 complex, subunit F	uc056zct.1;uc056zcu.1;uc007zth.2;uc007zti.2;uc056zcv.1;uc007ztj.1;uc007ztk.1;uc007ztl.2	11957;11957;11957;11957;11957;14390;14390;14390	0;0;0;0;0;0;0;0	Unchanged	Unchanged	Unchanged
Atp5j2	1221.82101898392	0.176304418969704	0.143340042658182	1.22997325590401	0.218707119900098	0.351182259692898	30196	chr5	145189967	145192179	2213	*	8.59	8.49	8.69	0.19	0.363	0.723	420.82	300.02	387.98	437	Promoter (<=1kb)	5	145183706	145191592	7887	2	57423	uc009amk.1	0	ENSMUSG00000038690	ATP synthase, H+ transporting, mitochondrial F0 complex, subunit F2	uc009amk.1;uc009amm.1	57423;67235	0;0	Unchanged	Unchanged	Unchanged
Atp5k	261.955927366896	-0.0545788867341201	0.180429304789588	-0.302494579789956	0.762275064748452	0.849166891031177	28848	chr5	108433565	108434376	812	*	6.26	6.1	6.4	0.31	0.35	0.712	78.27	58.5	76.08	93	Promoter (<=1kb)	5	108433253	108434378	1126	2	11958	uc008yoa.1	2	ENSMUSG00000050856	ATP synthase, H+ transporting, mitochondrial F1F0 complex, subunit E	uc008yoa.1;uc008yob.1;uc008ynz.2;uc012eas.2	11958;11958;18587;18587	0;0;45192;45192	Unchanged	Unchanged	Unchanged
Atp5l	92.9207794084716	0.372731816932392	0.248235255988994	1.50152650737459	0.133219435923505	0.240265383757014	38144	chr9	44919571	44922307	2737	*	8.5	8.49	8.52	0.03	0.864	0.966	409.77	307.54	373.72	361	Promoter (<=1kb)	9	44913248	44920742	7495	2	27425	uc009per.2	0	ENSMUSG00000038717	ATP synthase, H+ transporting, mitochondrial F0 complex, subunit G	uc057lzm.1;uc009peu.2;uc009per.2;uc009pes.2	140630;140630;27425;27425	37832;0;0;0	Unchanged	Unchanged	Unchanged
Atp5o	1012.88601769323	-0.0765013601495143	0.134240948020758	-0.56988095866013	0.568758440457008	0.697698732398914	15445	chr16	91930395	91932340	1946	*	7.75	7.78	7.73	-0.05	0.844	0.96	253.23	185.53	202.55	222	Promoter (<=1kb)	16	91925223	91931630	6408	2	28080	uc007zys.1	0	ENSMUSG00000022956	ATP synthase, H+ transporting, mitochondrial F1 complex, O subunit	uc007zys.1	28080	0	Unchanged	Unchanged	Unchanged
Atp5s	24.4008084329607	-0.85363569015654	0.406309929561802	-2.10094715400426	0.0356456054662538	0.0839314965588387	8183	chr12	69733787	69734376	590	*	5.24	5.31	5.17	-0.14	0.758	0.936	43.28	35.94	39.94	32	Intron (uc007nsr.1/68055, intron 1 of 4)	12	69724962	69744658	19697	1	68055	uc007nsr.1	8825	ENSMUSG00000054894	ATP synthase, H+ transporting, mitochondrial F0 complex, subunit S	uc007nsr.1;uc007nss.1	68055;68055	0;0	Unchanged	Unchanged	Unchanged
Atp6ap2	1907.26148931752	0.188225657994205	0.119403241874052	1.57638649537462	0.1149367587359	0.214309538285722	39932	chrX	12587790	12588489	700	*	6.15	6.07	6.22	0.16	0.636	0.89	67.22	66.86	68.47	81	Promoter (<=1kb)	20	12587759	12617051	29293	1	70495	uc009sqx.2	31	ENSMUSG00000031007	ATPase, H+ transporting, lysosomal accessory protein 2	uc009sqx.2	70495	0	Unchanged	Unchanged	Unchanged
Atp6v0a1	1580.81432009807	-0.408936361884405	0.147906530563079	-2.7648296551044	0.0056952528340012	0.0182394592368656	6716	chr11	101008747	101010087	1341	*	6.9	6.91	6.9	-0.01	0.973	0.994	136.28	103.63	114.11	124	Promoter (<=1kb)	11	101009452	101044823	35372	1	11975	uc029rof.1	0	ENSMUSG00000019302	ATPase, H+ transporting, lysosomal V0 subunit A1	uc029rof.1;uc007lmt.2;uc007lmu.3;uc007lmv.3;uc007lmw.3;uc007lmx.3	11975;11975;11975;11975;11975;11975	0;0;0;0;0;0	Unchanged	FGF_down	Unchanged
Atp6v0a2	3294.72610795359	0.0909659782220884	0.134146568824915	0.678108870162866	0.497702667043583	0.637161769120063	29429	chr5	124628185	124630253	2069	*	7.7	7.41	7.94	0.53	0.0205	0.136	177.72	162.13	221.57	268	Promoter (<=1kb)	5	124629052	124724455	95404	1	21871	uc029voj.2	0	ENSMUSG00000038023	ATPase, H+ transporting, lysosomal V0 subunit A2	uc029voj.2;uc029voh.1;uc029voi.1	21871;67978;67978	0;0;0	Unchanged	Unchanged	Unchanged
Atp6v0b	1731.03037195254	0.320358097238834	0.141222193963997	2.26846849101145	0.0233006673702035	0.0593541296693674	26266	chr4	117885990	117887764	1775	*	6.94	6.61	7.21	0.6	0.0284	0.169	112.34	83.57	159.76	137	Promoter (<=1kb)	4	117884330	117887329	3000	2	114143	uc008ujc.1	0	ENSMUSG00000033379	ATPase, H+ transporting, lysosomal V0 subunit B	uc008ujc.1;uc008ujb.2;uc012dju.2;uc008ujd.1;uc008uje.1	114143;53418;53418;67728;67728	0;0;0;0;0	Unchanged	Unchanged	Unchanged
Atp6v0d1	642.069411799085	0.0578392044800923	0.130106049210553	0.444554306514142	0.656641874962707	0.769731629026508	36773	chr8	105565111	105566034	924	*	6.46	6.45	6.47	0.02	0.947	0.988	95.77	79.39	88.44	89	Promoter (<=1kb)	8	105524470	105566040	41571	2	11972	uc009ndg.1	6	ENSMUSG00000013160	ATPase, H+ transporting, lysosomal V0 subunit D1	uc009ndh.2;uc033jhh.1;uc009ndi.2;uc009ndg.1	11604;11604;11604;11972	0;0;0;0	Unchanged	Unchanged	Unchanged
Atp6v0e	1383.03013584819	0.316397367138919	0.14681030946341	2.15514406512287	0.0311505623924137	0.0751467414969351	16095	chr17	26676053	26677699	1647	*	7.56	7.69	7.43	-0.26	0.268	0.631	227.44	185.53	155.95	188	Promoter (<=1kb)	17	26676396	26697951	21556	1	11974	uc008beh.1	0	ENSMUSG00000015575	ATPase, H+ transporting, lysosomal V0 subunit E	uc008beh.1;uc008bei.2	11974;11974	0;0	Unchanged	Unchanged	Unchanged
Atp6v1b2	727.193048000336	0.262943716902077	0.156346147832241	1.68180489604525	0.0926066790249885	0.180354412205746	36077	chr8	69090088	69090424	337	*	3.99	3.63	4.28	0.66	0.319	0.685	13.81	10.86	20.92	18	Promoter (1-2kb)	8	69088736	69107363	18628	1	11966	uc009lww.2	1352	ENSMUSG00000006273	ATPase, H+ transporting, lysosomal V1 subunit B2	uc009lwt.1;uc009lww.2;uc009lwx.3	110877;11966;11966	0;0;0	Unchanged	Unchanged	Unchanged
Atp6v1c1	539.050537197159	0.187128735893695	0.136149987837852	1.37443079404866	0.169307981576202	0.289006258030474	12741	chr15	38661908	38663012	1105	*	6.8	6.39	7.12	0.72	0.0102	0.0828	93	75.21	125.52	152	Promoter (<=1kb)	15	38661904	38692444	30541	1	66335	uc007vnv.2	4	ENSMUSG00000022295	ATPase, H+ transporting, lysosomal V1 subunit C1	uc007vnv.2	66335	0	Unchanged	Unchanged	Unchanged
Atp6v1d	402.793809146258	0.289309082196964	0.190941930787866	1.51516788901848	0.129729892722688	0.235299463876806	8406	chr12	78860528	78861542	1015	*	6.78	6.74	6.81	0.08	0.781	0.943	102.21	111.15	117.92	107	Promoter (<=1kb)	12	78842982	78861638	18657	2	73834	uc007nzj.1	96	ENSMUSG00000021114	ATPase, H+ transporting, lysosomal V1 subunit D	uc007nzk.1;uc007nzj.1	13665;73834	0;0	Unchanged	Unchanged	Unchanged
Atp6v1e1	650.843760865922	0.620481082843997	0.165826674687896	3.74174471032366	0.000182747108793957	0.000932618891676078	32038	chr6	120821545	120823401	1857	*	7.34	7.3	7.37	0.07	0.769	0.94	172.19	143.74	163.56	168	Promoter (<=1kb)	6	120795244	120822685	27442	2	11973	uc009dnr.1	0	ENSMUSG00000019210	ATPase, H+ transporting, lysosomal V1 subunit E1	uc009dnr.1	11973	0	Unchanged	FGF_up	Unchanged
Atp6v1f	651.307475016019	0.204357120678389	0.132880692643914	1.53789927349351	0.124073244977104	0.227129682852847	30634	chr6	29467307	29468966	1660	*	7.93	7.71	8.12	0.41	0.0575	0.266	227.44	191.38	280.53	275	Promoter (<=1kb)	6	29467783	29470509	2727	1	66144	uc009bdp.1	0	ENSMUSG00000004285	ATPase, H+ transporting, lysosomal V1 subunit F	uc009bdq.1;uc009bdp.1;uc012ejd.1	333088;66144;668210	15178;0;-2471	Unchanged	Unchanged	Unchanged
Atp6v1g1	305.435932690948	0.28681569517554	0.168201044095688	1.70519568839521	0.088157933887469	0.173446186820338	25733	chr4	63544803	63546517	1715	*	7.49	7.2	7.74	0.54	0.0236	0.149	163.91	130.37	220.62	206	Promoter (<=1kb)	4	63544831	63550701	5871	1	66290	uc057lir.1	0	ENSMUSG00000039105	ATPase, H+ transporting, lysosomal V1 subunit G1	uc008tgq.2;uc057lir.1	66290;66290	0;0	Unchanged	Unchanged	Unchanged
Atp6v1h	1108.92461364527	0.467449582030475	0.139669718059552	3.34682126179395	0.000817438987949046	0.00345108823170858	7	chr1	5082592	5085555	2964	*	8.25	8.18	8.32	0.13	0.54	0.846	333.34	248.2	329.98	307	Promoter (<=1kb)	1	5083086	5099777	16692	1	108664	uc007afm.2	0	ENSMUSG00000033793	ATPase, H+ transporting, lysosomal V1 subunit H	uc007afm.2;uc007afn.2;uc057atz.1	108664;108664;108664	0;0;0	Unchanged	FGF_up	Unchanged
Atp7a	696.54636498834	0.68530544563449	0.126298328207465	5.42608485291086	5.76035825912859e-08	6.5524896360118e-07	40467	chrX	106027295	106028129	835	*	4.94	5.08	4.79	-0.29	0.587	0.869	46.04	21.73	32.33	23	Promoter (<=1kb)	20	106027224	106128160	100937	1	11977	uc009ubl.3	71	ENSMUSG00000033792	ATPase, Cu++ transporting, alpha polypeptide	uc009ubl.3;uc012hnn.2;uc009ubk.1	11977;11977;66142	0;0;0	Unchanged	FGF_up	Unchanged
Atp8b2	2859.00905183418	0.485790070785662	0.187312947046919	2.59346766170936	0.00950134740986876	0.0281856798815467	24026	chr3	89961445	89964509	3065	*	8.75	8.68	8.82	0.14	0.478	0.808	453.97	366.88	445.99	457	Promoter (<=1kb)	3	89939481	89963332	23852	2	54667	uc033huy.1	0	ENSMUSG00000060671	ATPase, class I, type 8B, member 2	uc033hux.1;uc033huy.1	54667;54667	0;0	Unchanged	FGF_up	Unchanged
Atp8b3	50.8823582460003	0.00281521182806724	0.330351396930158	0.00852187051190954	0.993200613387309	0.996284828468746	3490	chr10	80537957	80539207	1251	*	6.53	6.42	6.63	0.22	0.457	0.795	88.4	82.73	101.75	97	Promoter (<=1kb)	10	80519585	80539124	19540	2	67331	uc007gdo.1	0	ENSMUSG00000003341	ATPase, class I, type 8B, member 3	uc007gdq.1;uc007gdr.1;uc007gds.1;uc007gdo.1;uc011xis.1;uc007gdp.1	66932;66932;66932;67331;67331;67331	7595;8779;0;0;0;0	Unchanged	Unchanged	Unchanged
Atp9a	9.6235846966322	-0.110263049573452	0.724862733366162	-0.152115765506947	0.879095629834372	0.926242893218982	23033	chr2	168740866	168742864	1999	*	7.35	7.18	7.5	0.33	0.182	0.523	161.14	128.7	172.12	191	Promoter (<=1kb)	2	168634438	168741800	107363	2	11981	uc008obc.1	0	ENSMUSG00000027546	ATPase, class II, type 9A	uc008obc.1;uc008obd.2;uc008obe.1	11981;11981;11981	0;0;0	Unchanged	Unchanged	Unchanged
Atp9b	1702.56755991144	0.136499393193552	0.139281794171567	0.980023225615628	0.327074654181136	0.473779141196975	18567	chr18	80932715	80934601	1887	*	7.77	7.52	7.98	0.46	0.0476	0.236	195.21	172.99	219.67	286	Promoter (<=1kb)	18	80734141	80934058	199918	2	50771	uc008fth.2	0	ENSMUSG00000024566	ATPase, class II, type 9B	uc008fth.2;uc008fti.2;uc008ftj.2;uc008ftk.1	50771;50771;50771;50771	0;0;0;0	Unchanged	Unchanged	Unchanged
Atpaf1	102.948316891211	-0.222670744089423	0.216299285601118	-1.0294566783732	0.303265127071255	0.449092404752279	26181	chr4	115784013	115785985	1973	*	7.48	7.43	7.53	0.1	0.685	0.912	205.34	139.56	172.12	198	Promoter (<=1kb)	4	115784814	115812314	27501	1	230649	uc008ufj.3	0	ENSMUSG00000028710	ATP synthase mitochondrial F1 complex assembly factor 1	uc008ufj.3;uc008ufi.2	230649;75173	0;-2979	Unchanged	Unchanged	Unchanged
Atpaf2	132.581122272792	-0.0408908339093378	0.20600478255725	-0.198494585425336	0.842658120678335	0.902136318375802	5401	chr11	60416433	60417060	628	*	6.71	6.56	6.85	0.3	0.31	0.676	111.42	76.89	107.46	124	Promoter (<=1kb)	11	60400624	60417099	16476	2	246782	uc007jfv.2	39	ENSMUSG00000042709	ATP synthase mitochondrial F1 complex assembly factor 2	uc007jfv.2;uc007jfw.2	246782;66771	0;0	Unchanged	Unchanged	Unchanged
Atpif1	708.794740953502	0.0788793739863082	0.196918439260162	0.400568754671549	0.688737653724427	0.795111477538384	26692	chr4	132534838	132536591	1754	*	7.13	7.26	6.98	-0.28	0.297	0.663	179.56	127.86	129.33	124	Promoter (<=1kb)	4	132530555	132535414	4860	2	11983	uc008vbl.3	0	ENSMUSG00000054428	ATPase inhibitory factor 1	uc008vbl.3;uc012dmi.1	11983;68598	0;0	Unchanged	Unchanged	Unchanged
Atr	538.384235114591	-0.664676164993559	0.150305522044868	-4.42216730264337	9.77157442943901e-06	6.8019719033579e-05	39204	chr9	95856851	95858731	1881	*	7.91	8.01	7.8	-0.21	0.374	0.733	304.79	209.76	226.32	218	Promoter (<=1kb)	9	95857597	95863538	5942	1	245000	uc009rbn.2	0	ENSMUSG00000032409	ataxia telangiectasia and Rad3 related	uc009rbn.2;uc009rbo.2;uc012gym.1;uc012gyn.1;uc033jmd.1;uc033jme.1	245000;245000;245000;245000;73410;73410	0;0;0;0;0;0	Unchanged	FGF_down	Unchanged
Atrn	1196.49846668916	-0.044797201445187	0.142824067893944	-0.313653028552945	0.753784579406949	0.842529382923196	22095	chr2	130905758	130907287	1530	*	6.87	6.88	6.87	-0.01	0.964	0.992	135.36	100.28	110.31	123	Promoter (<=1kb)	2	130906496	131030329	123834	1	11990	uc008mkc.2	0	ENSMUSG00000027312	attractin	uc008mkc.2;uc057led.1;uc008mkb.2;uc029ueq.1	11990;613258;613258;613258	0;0;0;0	Unchanged	Unchanged	Unchanged
Atrnl1	2065.66608972349	-0.53880201055127	0.218363846472282	-2.46745063001839	0.0136078984995475	0.0379648932928551	19957	chr19	57609565	57612611	3047	*	8.7	8.84	8.53	-0.31	0.463	0.798	581.04	338.46	320.47	419	Promoter (<=1kb)	19	57611034	58133343	522310	1	226255	uc008iai.3	0	ENSMUSG00000054843	attractin like 1	uc008iai.3	226255	0	Unchanged	FGF_down	Unchanged
Atrx	1305.06105477552	-0.179185287234001	0.116374267661533	-1.53973288798818	0.123625476724473	0.22665618926383	40462	chrX	105927695	105929866	2172	*	7.62	7.51	7.73	0.22	0.358	0.719	209.03	155.44	207.3	216	Promoter (<=1kb)	20	105797615	105929372	131758	2	22589	uc009ubb.2	0	ENSMUSG00000031229	ATRX, chromatin remodeler	uc009ubb.2;uc009ube.1;uc009ubf.1;uc009ubg.1	22589;22589;22589;22589	0;0;0;0	Unchanged	Unchanged	Unchanged
Atxn1	291.506685255752	0.250649564989386	0.177807519464142	1.40966796986296	0.158637746723564	0.275386833527964	9862	chr13	45963161	45966468	3308	*	8.68	8.56	8.78	0.23	0.33	0.696	465.01	289.15	413.66	468	Promoter (<=1kb)	13	45549755	45964991	415237	2	20238	uc011yyv.3	0	ENSMUSG00000046876	ataxin 1	uc011yyv.3;uc011yyw.3;uc011yyx.3	20238;20238;20238	0;0;0	Unchanged	Unchanged	Unchanged
Atxn10	1266.80474955317	0.408351179847004	0.125375638116112	3.25702174667158	0.00112587806955705	0.00455226477921036	13779	chr15	85335543	85337935	2393	*	8.34	8.05	8.59	0.54	0.0156	0.113	311.24	218.12	357.55	412	Promoter (<=1kb)	15	85336381	85463836	127456	1	54138	uc007xdd.1	0	ENSMUSG00000016541	ataxin 10	uc007xdd.1	54138	0	Unchanged	FGF_up	Unchanged
Atxn1l	543.966071155327	0.130163522755321	0.136693109005621	0.952231781852066	0.340979446083146	0.487195019675525	36929	chr8	109736642	109738135	1494	*	7.11	6.97	7.23	0.26	0.302	0.668	136.28	114.49	147.4	153	Promoter (<=1kb)	8	109726451	109737739	11289	2	52335	uc009njh.1	0	ENSMUSG00000069895	ataxin 1-like	uc009njh.1;uc009nji.1	52335;52335	0;0	Unchanged	Unchanged	Unchanged
Atxn2	32.2797415373543	0.431453007954392	0.376060617405964	1.14729644101135	0.251259124431948	0.390411993657129	29248	chr5	121710366	121713900	3535	*	8.97	8.86	9.07	0.21	0.273	0.637	511.98	417.02	502.1	574	Promoter (<=1kb)	5	121711609	121814950	103342	1	20239	uc008zke.1	0	ENSMUSG00000042605	ataxin 2	uc008zke.1	20239	0	Unchanged	Unchanged	Unchanged
Atxn2l	107.016785930231	0.28665889787386	0.277413118967076	1.03332855685128	0.301450167658251	0.446890980896616	34923	chr7	126501150	126503684	2535	*	8.92	8.91	8.94	0.03	0.871	0.968	549.73	411.17	481.17	501	Promoter (<=1kb)	7	126491708	126503302	11595	2	233871	uc009jrs.1	0	ENSMUSG00000032637	ataxin 2-like	uc009jrr.1;uc009jrs.1;uc009jrt.2;uc009jru.2;uc009jrv.1	233871;233871;233871;233871;233871	-1909;0;0;0;0	Unchanged	Unchanged	Unchanged
Atxn3	433.410311104965	0.520892869676725	0.155616603335141	3.3472833779498	0.000816077408478576	0.00344899476171709	8876	chr12	101956365	101958230	1866	*	8.24	8.08	8.38	0.3	0.148	0.468	295.58	244.86	315.71	350	Promoter (<=1kb)	12	101918901	101958243	39343	2	110616	uc007otv.2	13	ENSMUSG00000021189	ataxin 3	uc007otv.2;uc007otw.2;uc011yql.1	110616;110616;110616	0;0;0	Unchanged	FGF_up	Unchanged
Atxn7	172.383187361301	0.575552737376095	0.206309978112036	2.78974745983223	0.00527491686206189	0.0171134110573734	10951	chr14	14012078	14013778	1701	*	6.94	7.02	6.85	-0.16	0.581	0.867	151.01	107.81	93.19	138	Promoter (<=1kb)	14	14012491	14107302	94812	1	246103	uc007sgi.3	0	ENSMUSG00000021738	ataxin 7	uc007sgi.3	246103	0	Unchanged	FGF_up	Unchanged
Atxn7l1	217.393267008114	-0.360508261703769	0.18126788993313	-1.98881479691059	0.0467216489270978	0.10406581214623	7875	chr12	33147717	33148509	793	*	6.61	6.64	6.58	-0.07	0.824	0.954	111.42	88.58	97.95	93	Promoter (<=1kb)	12	33147686	33251157	103472	1	380753	uc007nin.2	31	ENSMUSG00000020564	ataxin 7-like 1	uc007nil.1;uc007nim.1;uc007nin.2;uc007nio.2;uc007nip.2	320046;320046;380753;380753;380753	0;0;0;0;0	Unchanged	Unchanged	Unchanged
Atxn7l2	159.406562268662	0.143238640130595	0.200637083327392	0.713919070966874	0.475277223932832	0.616575858075025	24499	chr3	108209669	108211353	1685	*	7.34	7.34	7.35	0.02	0.944	0.987	188.77	134.55	156.9	170	Promoter (<=1kb)	3	108202228	108210527	8300	2	72522	uc008qyl.2	0	ENSMUSG00000048997	ataxin 7-like 2	uc008qyn.1;uc008qyl.2;uc008qym.2	17306;72522;72522	15246;0;0	Unchanged	Unchanged	Unchanged
Atxn7l3	701.342839100746	0.165647553997665	0.135499266154115	1.22249779426303	0.221519437505308	0.35452601996029	6808	chr11	102295209	102297072	1864	*	8.05	7.98	8.11	0.13	0.545	0.848	270.72	235.67	253.9	300	Promoter (<=1kb)	11	102289300	102296629	7330	2	217218	uc007lrg.1	0	ENSMUSG00000059995	ataxin 7-like 3	uc007lre.1;uc007lrf.1;uc007lrg.1;uc007lrh.1	217218;217218;217218;217218	-1765;-150;0;0	Unchanged	Unchanged	Unchanged
Atxn7l3b	1214.35757586298	0.613309722128283	0.176911302482797	3.46676392927423	0.00052676430372779	0.00234745971594129	4048	chr10	112928217	112929449	1233	*	7.37	7.34	7.4	0.06	0.799	0.947	169.43	154.61	180.68	157	Promoter (<=1kb)	10	112925428	112929026	3599	2	382423	uc007has.1	0	ENSMUSG00000074748	ataxin 7-like 3B	uc007has.1	382423	0	Unchanged	FGF_up	Unchanged
AU021063	4.96682317116056	-0.0163465662635786	0.849413643684386	-0.0192445299002666	0.984646034446983	0.992451459243577	14160	chr15	101219697	101221993	2297	*	6.98	6.72	7.21	0.49	0.065	0.287	116.02	94.43	135.03	161	Promoter (<=1kb)	15	101221247	101222155	909	1	105968	uc029svg.1	0	ENSMUSG00000115944	expressed sequence AU021063	uc029svg.1;uc007xss.2;uc029svf.1;uc007xst.2;uc007xsu.1	105968;380977;380977;380977;56149	0;0;0;0;0	Unchanged	Unchanged	Unchanged
AU022252	90.3546430555496	0.122297543110315	0.253062455438852	0.48327019864812	0.628903897254566	0.747054213794622	26299	chr4	119232069	119232714	646	*	5.42	5.48	5.35	-0.13	0.769	0.94	55.25	34.26	44.69	37	Promoter (<=1kb)	4	119225138	119232724	7587	2	230696	uc008ulo.2	10	ENSMUSG00000078584	expressed sequence AU022252	uc008ulo.2;uc008ulp.2;uc008ulq.1;uc012dkf.1;uc008ulr.1	230696;56401;56401;56401;56401	0;0;0;0;0	Unchanged	Unchanged	Unchanged
AU040320	10.5811044001935	-0.228976743962417	0.593386675117889	-0.385881169166674	0.69958467740118	0.802301937045011	26484	chr4	126752342	126754378	2037	*	7.3	7.29	7.3	0.01	0.968	0.993	174.96	138.73	140.74	175	Promoter (<=1kb)	4	126753555	126869694	116140	1	100317	uc008utv.1	0	ENSMUSG00000028830	expressed sequence AU040320	uc008utv.1;uc008utw.1;uc008utx.1;uc008utu.2;uc008utt.2	100317;100317;100317;26562;26562	0;0;0;0;0	Unchanged	Unchanged	Unchanged
AU041133	17.0644872895316	-0.477978067945982	0.493594744524183	-0.968361339435946	0.332863940307699	0.479439601657944	3633	chr10	82127994	82128555	562	*	5.55	5.28	5.78	0.5	0.217	0.57	42.36	35.1	47.55	62	Promoter (<=1kb)	10	82128013	82153065	25053	1	216177	uc007gjk.2	0	ENSMUSG00000078435	expressed sequence AU041133	uc007gjk.2	216177	0	Unchanged	Unchanged	Unchanged
Auh	81.5168959710687	-0.444841013944758	0.243338311021218	-1.82807636034742	0.0675380922457135	0.140141541409856	10030	chr13	52928833	52929660	828	*	5.87	5.72	6	0.28	0.464	0.799	66.3	39.28	62.76	65	Promoter (<=1kb)	13	52835110	52929677	94568	2	11992	uc007qnd.1	17	ENSMUSG00000021460	AU RNA binding protein/enoyl-coenzyme A hydratase	uc007qnd.1;uc007qne.1;uc007qnf.2;uc007qng.1	11992;11992;11992;11992	0;0;0;0	Unchanged	Unchanged	Unchanged
Aunip	36.568721236515	-1.50283310393703	0.376559391462504	-3.99095903065979	6.5806648665227e-05	0.000375248599640645	26826	chr4	134511029	134512932	1904	*	7.07	7.32	6.75	-0.57	0.0247	0.153	166.67	153.77	104.6	111	Promoter (<=1kb)	4	134510999	134523922	12924	1	69885	uc008vfg.1	30	ENSMUSG00000078521	aurora kinase A and ninein interacting protein	uc008vfg.1;uc008vfd.2;uc008vfe.2;uc008vff.2;uc033ifj.1;uc033ifk.1	69885;71904;71904;71904;71904;71904	0;0;0;0;0;0	Unchanged	FGF_down	Unchanged
Aup1	1832.55436695643	0.254213763053331	0.141221651393473	1.80010473284326	0.071844102435478	0.147286464554593	31351	chr6	83052482	83056023	3542	*	9.26	9.22	9.3	0.08	0.662	0.904	662.07	527.33	599.09	660	Promoter (<=1kb)	6	83054521	83057682	3162	1	11993	uc009cly.2	0	ENSMUSG00000068328	ancient ubiquitous protein 1	uc033isp.1;uc009cly.2;uc009clz.2;uc009cma.2;uc009clt.1;uc012env.1;uc009clu.4;uc009clv.4;uc009clw.1;uc029vwv.1;uc009clx.1;uc009cmb.1;uc009cmc.1;uc009cmd.1	102465630;11993;11993;11993;16950;16950;64704;64704;64704;64704;64704;93838;93838;93838	2771;0;0;0;0;0;0;0;0;0;0;-1821;-1821;-4389	Unchanged	Unchanged	Unchanged
Aurka	277.357228444128	-1.13950875504396	0.18069498310909	-6.30625563276436	2.8586674431351e-10	4.74538795560426e-09	23068	chr2	172369662	172371840	2179	*	7.86	7.8	7.91	0.11	0.627	0.887	247.7	197.23	209.21	272	Promoter (<=1kb)	2	172356190	172370570	14381	2	20878	uc008ocn.2	0	ENSMUSG00000027496	aurora kinase A	uc008ocn.2;uc008oco.2;uc008ocp.1;uc008ocq.1	20878;20878;67337;67337	0;0;0;0	Unchanged	FGF_down	Unchanged
Aurkaip1	448.519435411984	0.0894548397794217	0.148756472846525	0.601350906401997	0.547606290047122	0.679305829321911	27590	chr4	155830633	155832578	1946	*	7.17	7.14	7.19	0.05	0.825	0.955	155.62	126.19	142.64	150	Promoter (<=1kb)	4	155831269	155833098	1830	1	66077	uc008wey.2	0	ENSMUSG00000065990	aurora kinase A interacting protein 1	uc008wey.2	66077	0	Unchanged	Unchanged	Unchanged
Aurkb	223.955687479429	-1.27214757857381	0.193088845252188	-6.58840533699547	4.44575559615517e-11	8.367822186653e-10	5562	chr11	69045048	69047269	2222	*	7.22	7.5	6.86	-0.64	0.0132	0.1	206.26	156.28	119.82	113	Promoter (<=1kb)	11	69045637	69051664	6028	1	20877	uc007jpa.2	0	ENSMUSG00000020897	aurora kinase B	uc007jpa.2	20877	0	Unchanged	FGF_down	Unchanged
Auts2	296.410514133505	-1.27647743879042	0.198715877510044	-6.42363083808387	1.33061671692574e-10	2.32848184490431e-09	29565	chr5	131536794	131539197	2404	*	8.35	8.64	8	-0.64	0.00846	0.0728	474.22	322.58	213.01	298	Promoter (<=1kb)	5	131437682	131538687	101006	2	319974	uc008zuu.1	0	ENSMUSG00000029673	autism susceptibility candidate 2	uc008zuu.1;uc008zuv.1	319974;319974	0;0	Unchanged	FGF_down	Unchanged
AV039307	8.92570679810365	-0.397766352823658	0.673083279729023	-0.590961571625721	0.554546169436715	0.68562489056663	21779	chr2	120850668	120851472	805	*	5.54	5.36	5.7	0.33	0.412	0.763	40.52	41.79	43.74	60	Promoter (<=1kb)	2	120850656	120866690	16035	1	100502700	uc008lwz.2	12	ENSMUSG00000087519	expressed sequence AV039307	uc008lwz.2;uc008lxa.2;uc008lww.3;uc008lwx.3;uc008lwy.3	100502700;100502700;140810;140810;140810	0;0;0;0;0	Unchanged	Unchanged	Unchanged
AV051173	9.95933681646793	0.249652495258689	0.696880437960526	0.358242937611101	0.720161517068701	0.818502325219201	26227	chr4	116684782	116686797	2016	*	7.9	7.91	7.9	0	0.989	0.998	265.2	214.78	240.59	238	Promoter (<=1kb)	4	116684962	116686022	1061	2	100502959	uc008uhc.3	0	NA	expressed sequence AV051173	uc008uhc.3;uc008uhd.1	100502959;18477	0;0	Unchanged	Unchanged	Unchanged
Aven	23.4448036723925	0.137370181515166	0.416385676726742	0.329910919595145	0.741467272382383	0.83391520085765	21613	chr2	112492127	112494081	1955	*	7.88	7.95	7.81	-0.14	0.575	0.864	298.35	194.72	215.86	232	Promoter (<=1kb)	2	112492964	112631253	138290	1	74268	uc008lpe.2	0	ENSMUSG00000003604	apoptosis, caspase activation inhibitor	uc008lpe.2	74268	0	Unchanged	Unchanged	Unchanged
Avil	298.315739350632	4.65904465590023	0.599765967465141	7.7681044084433	7.9669380741503e-15	2.55283763705749e-13	4279	chr10	127001759	127002186	428	*	3.96	1.18	4.85	3.68	3.71e-05	0.00113	3.68	0.84	23.77	34	Promoter (1-2kb)	10	127000709	127020994	20286	1	11567	uc007hhl.2	1050	ENSMUSG00000025432	advillin	uc007hhl.2;uc007hhj.2;uc011xph.1;uc011xpj.1;uc011xpk.1	11567;52468;52468;52468;723882	0;23042;23042;6146;3319	FGF_up	FGF_up	FGF_up
Avl9	596.393478001242	0.548539885930473	0.141035727048523	3.8893682998617	0.00010050549283618	0.000548762745718603	31195	chr6	56714848	56716034	1187	*	7.74	7.67	7.81	0.13	0.546	0.849	224.68	183.02	224.42	223	Promoter (<=1kb)	6	56714905	56737157	22253	1	78937	uc009cbk.2	0	ENSMUSG00000029787	AVL9 cell migration associated	uc009cbk.2;uc009cbl.2	78937;78937	0;0	Unchanged	FGF_up	Unchanged
Avpi1	604.262034122874	-0.304073002043182	0.180023591763711	-1.68907307683479	0.091205426586865	0.178060643346326	19560	chr19	42124488	42129066	4579	*	9.61	9.57	9.66	0.09	0.628	0.887	863.73	652.69	735.08	884	Promoter (<=1kb)	19	42123275	42128993	5719	2	69534	uc008hnh.1	0	ENSMUSG00000018821	arginine vasopressin-induced 1	uc008hnh.1;uc008hng.1	69534;84095	0;0	Unchanged	Unchanged	Unchanged
[truncated: 8,318 more rows]
